# Supplementary material for: Quantitative proteomic analysis of MDCK cell adhesion
Source: Royal Society of Chemistry journal article supplement (doi:10.1039/d0mo00055h), 2020-11-12
Supplement: d0mo00055h3.xlsx [file d0mo00055h3.xlsx]

## Sheet: Sheet1
Table S2. Quantitative of proteins between MDCKADH cell and MDCKSUS cell
Protein IDs	Majority protein IDs	Fasta headers	Number of proteins	Peptides	Razor + unique peptides	Unique peptides	Sequence coverage [%]	Mol. weight [kDa]	Sequence length	Score	Intensity	SU_CK1/Ref	SU_CK2/Ref	SU_CK3/Ref	AD_CK1/Ref	AD_CK2/Ref	AD_CK3/Ref	P.value	FC(3/1)	SU/AD-1	SU/AD-2	SU/AD-3
P54714;A0A0A0MPD0	P54714;A0A0A0MPD0	sp|P54714|TPIS_CANLF Triosephosphate isomerase OS=Canis lupus familiaris GN=TPI1 PE=1 SV=3;tr|A0A0A0MPD0|A0A0A0MPD0_CANLF Triosephosphate isomerase OS=Canis lupus familiaris GN=TPI1 PE=3 SV=1	2	12	12	12	67.1	26.714	249	121.86	28848000000	1.33783	1.28519	1.28871	0.876773	0.868726	0.792872	0.000133159	1.54104
A4GT58	A4GT58	tr|A4GT58|A4GT58_CANLF Cdc42 GTPase-activating protein OS=Canis lupus familiaris GN=ARHGAP1 PE=2 SV=1	1	10	10	10	22.8	50.585	439	29.693	5226100000	1.25608	1.37326	1.16603	0.973433	0.815225	0.908972	0.00838181	1.40693
J9P9T3;B4YY02	J9P9T3;B4YY02	tr|J9P9T3|J9P9T3_CANLF Adenylate kinase isoenzyme 1 OS=Canis lupus familiaris GN=AK1 PE=3 SV=1;tr|B4YY02|B4YY02_CANLF Adenylate kinase isoenzyme 1 OS=Canis lupus familiaris GN=AK1 PE=3 SV=1	2	3	3	3	16.5	21.65	194	7.494	432290000	1.12555	1.08444	1.13622	0.912016	0.955294	0.902518	0.00105863	1.20809
Q8HZQ9;Q4PLA8;C0KKU9;O46605;Q6PSM2;Q8WNU6;O77794;F1PH11;O18808;Q8HYR5;F1Q234;F1PM25	Q8HZQ9;Q4PLA8;C0KKU9;O46605;Q6PSM2;Q8WNU6	tr|Q8HZQ9|Q8HZQ9_CANLF Multidrug resistance p-glycoprotein OS=Canis lupus familiaris PE=2 SV=1;tr|Q4PLA8|Q4PLA8_CANLF ATP binding cassette subfamily B member 1 OS=Canis lupus familiaris GN=MDR1 PE=2 SV=1;tr|C0KKU9|C0KKU9_CANLF p-glycoprotein OS=Canis lupus	12	23	23	21	18.7	141.54	1281	77.357	2624100000	1.18255	1.21069	1.14627	0.871117	0.848676	0.873147	9.85878e-05	1.36506
E2QS13	E2QS13	tr|E2QS13|E2QS13_CANLF Parkinsonism associated deglycase OS=Canis lupus familiaris GN=PARK7 PE=4 SV=1	1	8	8	8	49.7	19.954	189	44.112	5214900000	1.15501	1.21912	1.25884	0.877166	0.912741	0.83824	0.000835309	1.38233
E2QS94;F6USW0	E2QS94	tr|E2QS94|E2QS94_CANLF Uncharacterized protein OS=Canis lupus familiaris GN=HRSP12 PE=4 SV=1	2	6	6	6	61.3	14.318	137	34.956	5603700000	1.29819	1.3317	1.38372	0.758018	0.826738	0.716103	0.00015032	1.7444
E2QSC8	E2QSC8	tr|E2QSC8|E2QSC8_CANLF Tetraspanin OS=Canis lupus familiaris GN=TSPAN8 PE=3 SV=1	1	3	3	3	13.1	25.802	237	65.953	5496700000	1.10998	1.1269	1.17257	0.9045	0.942647	0.958246	0.00120992	1.21532
E2QTC7	E2QTC7	tr|E2QTC7|E2QTC7_CANLF Peptidylprolyl isomerase D OS=Canis lupus familiaris GN=PPID PE=4 SV=1	1	14	13	13	36	41.257	372	30.483	2946400000	1.22884	1.22235	1.17561	0.960083	0.972952	0.88696	0.0010448	1.28611
E2QTE2	E2QTE2	tr|E2QTE2|E2QTE2_CANLF Pyridoxamine 5-phosphate oxidase OS=Canis lupus familiaris GN=PNPO PE=3 SV=1	1	3	3	3	16.1	30.065	261	20.265	215220000	1.15336	1.22831	1.08501	0.890427	0.868767	0.985493	0.0117301	1.26305
E2QUL3;F1Q0U3;J9P2B0;E2R463;F1PTR5	E2QUL3	tr|E2QUL3|E2QUL3_CANLF Acyl-CoA synthetase long chain family member 1 OS=Canis lupus familiaris GN=ACSL1 PE=4 SV=1	5	24	24	24	37.8	77.952	698	79.86	7218800000	1.1807	1.11923	1.0635	0.921045	0.887587	0.890286	0.00336495	1.24621
E2QUQ7	E2QUQ7	tr|E2QUQ7|E2QUQ7_CANLF Tetraspanin OS=Canis lupus familiaris GN=UPK1B PE=3 SV=1	1	3	3	3	13.5	29.746	260	8.0065	1677100000	1.51164	1.38814	1.43276	0.730563	0.618339	0.876462	0.00106802	1.94689
E2QV08;F1Q1R1	E2QV08;F1Q1R1	tr|E2QV08|E2QV08_CANLF Malate dehydrogenase OS=Canis lupus familiaris GN=MDH1 PE=3 SV=2;tr|F1Q1R1|F1Q1R1_CANLF Malate dehydrogenase OS=Canis lupus familiaris GN=MDH1 PE=3 SV=2	2	12	12	12	37.6	38.246	348	46.073	19613000000	1.29731	1.26231	1.23581	0.862301	0.858552	0.915327	0.000111577	1.43974
E2QV12	E2QV12	tr|E2QV12|E2QV12_CANLF Phosphoglucomutase 2 OS=Canis lupus familiaris GN=PGM2 PE=4 SV=1	1	8	8	8	16.3	68.473	615	28.131	746490000	1.13105	1.16659	1.40566	1.01881	0.972522	0.964325	0.047064	1.25295
E2QV97	E2QV97	tr|E2QV97|E2QV97_CANLF Asparaginyl-tRNA synthetase OS=Canis lupus familiaris GN=NARS PE=4 SV=1	1	15	15	15	32.4	64.222	559	132.83	4652000000	1.15982	1.16669	1.13971	0.997198	0.983882	0.896772	0.00380838	1.20445
E2QVP4	E2QVP4	tr|E2QVP4|E2QVP4_CANLF NADH dehydrogenase [ubiquinone] flavoprotein 2 OS=Canis lupus familiaris GN=NDUFV2 PE=4 SV=1	1	5	5	5	24.5	27.402	249	24.443	3099300000	1.06074	1.24807	1.20501	0.978487	0.899022	1.02938	0.0412444	1.20879
E2QVU9	E2QVU9	tr|E2QVU9|E2QVU9_CANLF Biliverdin reductase B OS=Canis lupus familiaris GN=BLVRB PE=4 SV=1	1	7	7	7	51	22.079	206	109.97	5197600000	1.47424	1.38241	1.37575	0.77829	0.862974	0.713151	0.000311107	1.79764
E2QWF5	E2QWF5	tr|E2QWF5|E2QWF5_CANLF Peptidylprolyl isomerase OS=Canis lupus familiaris GN=FKBP4 PE=4 SV=2	1	19	19	19	48.8	51.518	459	267.31	11964000000	1.17333	1.17488	1.12036	0.95968	0.881886	0.877343	0.00148124	1.27572
E2QX60;E2QX58	E2QX60;E2QX58	tr|E2QX60|E2QX60_CANLF Tensin 4 OS=Canis lupus familiaris GN=TNS4 PE=4 SV=1;tr|E2QX58|E2QX58_CANLF Tensin 4 OS=Canis lupus familiaris GN=TNS4 PE=4 SV=2	2	5	5	5	9.8	76.333	715	27.102	274280000	1.13752	1.35158	1.0818	0.977235	0.91636	0.949126	0.0447167	1.25615
E2QX73	E2QX73	tr|E2QX73|E2QX73_CANLF 3-hydroxy-3-methylglutaryl coenzyme A synthase OS=Canis lupus familiaris GN=HMGCS1 PE=3 SV=1	1	8	8	8	16.5	57.25	520	25.031	1780900000	1.43801	1.40415	1.3341	0.701448	0.705274	0.691557	2.33563e-05	1.99032
E2QXB6	E2QXB6	tr|E2QXB6|E2QXB6_CANLF Lactamase beta 2 OS=Canis lupus familiaris GN=LACTB2 PE=4 SV=1	1	4	4	4	16	32.643	288	15.274	259080000	1.23084	1.03704	1.26273	0.876718	0.900788	0.906504	0.0165559	1.31542
E2QXC2	E2QXC2	tr|E2QXC2|E2QXC2_CANLF Uncharacterized protein OS=Canis lupus familiaris PE=4 SV=2	1	1	1	1	3.3	46.292	418	-2	1326800000	1.78481	1.8731	1.87937	0.601365	0.519527	0.484528	9.15458e-06	3.44912
E2QXD1	E2QXD1	tr|E2QXD1|E2QXD1_CANLF Annexin OS=Canis lupus familiaris GN=ANXA7 PE=3 SV=2	1	11	11	11	26	52.567	488	120.13	2280200000	1.22139	1.29774	1.32313	0.937717	0.944019	0.876421	0.000642603	1.39305
E2QXD6	E2QXD6	tr|E2QXD6|E2QXD6_CANLF Uncharacterized protein OS=Canis lupus familiaris PE=4 SV=2	1	7	7	7	14.9	53.19	483	42.382	1065600000	1.25422	1.33054	1.19893	0.904982	0.702228	0.850592	0.00349859	1.53946
E2QXF0;W0S257	E2QXF0;W0S257	tr|E2QXF0|E2QXF0_CANLF Folate receptor beta OS=Canis lupus familiaris GN=FOLR2 PE=4 SV=1;tr|W0S257|W0S257_CANLF Folate binding protein (Fragment) OS=Canis lupus familiaris GN=FBP PE=4 SV=1	2	3	3	3	12.9	29.669	255	5.5766	150240000	1.30666	1.02182	1.31679	0.968654	0.916707	0.878168	0.0426374	1.31906
J9NRH1;E2QXL2	J9NRH1;E2QXL2	tr|J9NRH1|J9NRH1_CANLF Dynamin 1 like OS=Canis lupus familiaris GN=DNM1L PE=3 SV=1;tr|E2QXL2|E2QXL2_CANLF Dynamin 1 like OS=Canis lupus familiaris GN=DNM1L PE=3 SV=2	2	10	10	1	15.6	81.886	736	26.38	715610000	1.2264	1.16926	1.23342	0.925858	0.887333	0.851443	0.000406407	1.36194
E2QXN8	E2QXN8	tr|E2QXN8|E2QXN8_CANLF Annexin OS=Canis lupus familiaris GN=ANXA11 PE=3 SV=1	1	16	16	15	36.8	54.429	505	281.21	16160000000	1.46734	1.43231	1.28924	0.752651	0.773848	0.691691	0.000389793	1.88842
E2QXP3	E2QXP3	tr|E2QXP3|E2QXP3_CANLF Arginyl aminopeptidase OS=Canis lupus familiaris GN=RNPEP PE=4 SV=2	1	9	9	9	17.1	72.265	650	44.237	1075700000	1.19752	1.13985	1.33384	0.886206	0.914257	0.872072	0.00480852	1.37369
J9P388;E2QY31	J9P388;E2QY31	tr|J9P388|J9P388_CANLF Platelet-activating factor acetylhydrolase IB subunit alpha OS=Canis lupus familiaris GN=PAFAH1B1 PE=3 SV=1;tr|E2QY31|E2QY31_CANLF Platelet-activating factor acetylhydrolase IB subunit alpha OS=Canis lupus familiaris GN=PAFAH1B1 PE=3	2	9	9	9	31	46.621	410	31.227	2038000000	1.23499	1.14305	1.07857	0.927741	0.889324	0.921292	0.00696649	1.26229
E2QY46;J9P4U9	E2QY46;J9P4U9	tr|E2QY46|E2QY46_CANLF Dicarbonyl and L-xylulose reductase OS=Canis lupus familiaris GN=DCXR PE=4 SV=1;tr|J9P4U9|J9P4U9_CANLF Dicarbonyl and L-xylulose reductase OS=Canis lupus familiaris GN=DCXR PE=3 SV=1	2	6	6	6	31.6	25.719	244	24.191	1539000000	1.19362	1.09294	1.222	0.968654	0.940399	0.927682	0.00545669	1.23683
E2QYC2;J9NUU1	E2QYC2	tr|E2QYC2|E2QYC2_CANLF Tubulin beta chain OS=Canis lupus familiaris GN=TUBB6 PE=3 SV=1	2	16	9	6	46.2	49.867	446	97.115	10183000000	1.27598	1.30453	1.27066	0.880015	0.928506	0.772199	0.0008661	1.49229
E2QYG6	E2QYG6	tr|E2QYG6|E2QYG6_CANLF ATPase H+ transporting V1 subunit A OS=Canis lupus familiaris GN=ATP6V1A PE=3 SV=1	1	14	14	14	26.9	68.401	618	93.092	8334900000	1.26074	1.20984	1.2284	0.851234	0.843062	0.735343	0.000460641	1.52244
E2QYH0;E2QYI2	E2QYH0;E2QYI2	tr|E2QYH0|E2QYH0_CANLF NECAP endocytosis associated 2 OS=Canis lupus familiaris GN=NECAP2 PE=4 SV=1;tr|E2QYI2|E2QYI2_CANLF NECAP endocytosis associated 2 OS=Canis lupus familiaris GN=NECAP2 PE=4 SV=2	2	2	2	2	9	28.692	267	4.2873	97567000	1.2277	1.33519	1.11108	0.946628	0.972282	0.930811	0.0139929	1.28924
E2QYQ0	E2QYQ0	tr|E2QYQ0|E2QYQ0_CANLF Adenine phosphoribosyltransferase OS=Canis lupus familiaris GN=APRT PE=3 SV=1	1	6	6	6	37.2	19.691	180	14.989	1331200000	1.27865	1.40222	1.22028	1.06238	0.900897	0.76699	0.017987	1.42885
E2QZ37	E2QZ37	tr|E2QZ37|E2QZ37_CANLF Migration and invasion enhancer 1 OS=Canis lupus familiaris GN=MIEN1 PE=4 SV=1	1	2	2	2	15.7	12.34	115	4.2774	312710000	1.1415	1.52513	1.51322	0.926984	0.823677	0.684301	0.0157015	1.7166
E2QZ69	E2QZ69	tr|E2QZ69|E2QZ69_CANLF Histidyl-tRNA synthetase OS=Canis lupus familiaris GN=HARS PE=3 SV=1	1	11	11	10	21.4	57.346	509	33.191	1449300000	1.22702	1.1495	1.13258	0.977055	0.903426	0.888675	0.00348151	1.26721
E2R0K3;E2QZQ6;F1PX07;F1Q409;F1PNZ5;J9NXV1;E2R4K8;F1PWZ8;E2RNP3;E2R9X8;F1PHV5	E2R0K3;E2QZQ6	tr|E2R0K3|E2R0K3_CANLF Copine 3 OS=Canis lupus familiaris GN=CPNE3 PE=4 SV=1;tr|E2QZQ6|E2QZQ6_CANLF Copine 3 OS=Canis lupus familiaris GN=CPNE3 PE=4 SV=1	11	12	12	10	22.3	59.63	533	33.427	2233000000	1.29322	1.06374	1.24838	0.820853	0.61845	0.844738	0.0118199	1.57849
E2QZV5	E2QZV5	tr|E2QZV5|E2QZV5_CANLF Protein kinase cAMP-dependent type I regulatory subunit alpha OS=Canis lupus familiaris GN=PRKAR1A PE=4 SV=1	1	4	4	4	8.3	57.216	515	10.971	203340000	1.26644	1.24328	1.17633	0.929877	0.800145	0.955139	0.00375279	1.37275
E2R002	E2R002	tr|E2R002|E2R002_CANLF Prostaglandin reductase 1 OS=Canis lupus familiaris GN=PTGR1 PE=4 SV=2	1	16	16	16	57.1	35.731	329	210.78	39008000000	1.40492	1.33213	1.23526	0.953464	0.840432	0.807121	0.00230114	1.52721
F1PQF1;E2R097	F1PQF1;E2R097	tr|F1PQF1|F1PQF1_CANLF X-prolyl aminopeptidase 1 OS=Canis lupus familiaris GN=XPNPEP1 PE=3 SV=2;tr|E2R097|E2R097_CANLF X-prolyl aminopeptidase 1 OS=Canis lupus familiaris GN=XPNPEP1 PE=3 SV=2	2	10	10	10	21.2	69.838	623	54.833	1273200000	1.34476	1.19017	1.27191	0.897237	0.91669	0.839411	0.00157589	1.43474
J9P7N4;E2R0C6	J9P7N4;E2R0C6	tr|J9P7N4|J9P7N4_CANLF Acyl-CoA synthetase short chain family member 2 OS=Canis lupus familiaris GN=ACSS2 PE=4 SV=1;tr|E2R0C6|E2R0C6_CANLF Acyl-CoA synthetase short chain family member 2 OS=Canis lupus familiaris GN=ACSS2 PE=4 SV=2	2	6	6	6	8.8	79	701	13.682	924040000	1.07701	1.47595	1.16207	0.807931	0.857982	0.739319	0.0257603	1.54456
E2R0I9;J9P9E9;REV__E2QZZ2	E2R0I9;J9P9E9	tr|E2R0I9|E2R0I9_CANLF Glucose-6-phosphate 1-dehydrogenase OS=Canis lupus familiaris GN=G6PD PE=3 SV=2;tr|J9P9E9|J9P9E9_CANLF Glucose-6-phosphate 1-dehydrogenase OS=Canis lupus familiaris GN=G6PD PE=3 SV=1	3	22	22	22	48.6	59.678	518	104.29	13863000000	1.28002	1.23565	1.27781	0.969797	0.919365	0.915899	0.000129287	1.35237
E2R0N3	E2R0N3	tr|E2R0N3|E2R0N3_CANLF Annexin OS=Canis lupus familiaris GN=ANXA3 PE=3 SV=1	1	10	9	9	34.4	36.219	323	75.313	1260300000	1.27038	1.32254	1.23516	1.04563	0.877579	0.922161	0.00434623	1.34537
E2R0S6	E2R0S6	tr|E2R0S6|E2R0S6_CANLF Annexin OS=Canis lupus familiaris PE=3 SV=2	1	16	16	16	49.5	42.615	386	228.37	29809000000	1.30194	1.32589	1.29465	1.01107	0.867908	0.865757	0.00131648	1.42909
E2R125	E2R125	tr|E2R125|E2R125_CANLF Perilipin OS=Canis lupus familiaris GN=PLIN3 PE=3 SV=1	1	7	7	7	21.4	47.929	443	48.372	1057400000	1.4893	1.40558	1.40676	0.745276	0.778114	0.732419	2.4861e-05	1.90692
E2R134	E2R134	tr|E2R134|E2R134_CANLF Carnosine dipeptidase 2 OS=Canis lupus familiaris GN=CNDP2 PE=4 SV=2	1	9	9	8	22.6	52.599	473	29.568	2053400000	1.17688	1.37471	1.31921	0.967902	0.683855	0.832835	0.0102204	1.55792
E2R1M6	E2R1M6	tr|E2R1M6|E2R1M6_CANLF Phosphohistidine phosphatase 1 OS=Canis lupus familiaris GN=PHPT1 PE=4 SV=2	1	4	4	4	33.1	14.487	130	10.007	310030000	1.57263	1.25137	1.37476	0.835921	0.702375	0.791706	0.00357056	1.80204
E2R1R4;E2RJ52;J9NUC4;E2QUI3	E2R1R4	tr|E2R1R4|E2R1R4_CANLF Uncharacterized protein OS=Canis lupus familiaris GN=ATP6V1E1 PE=3 SV=1	4	8	8	8	35	26.173	226	35.462	2870600000	1.15713	1.22035	1.27248	0.887405	0.893263	0.858182	0.000655397	1.38316
E2R210	E2R210	tr|E2R210|E2R210_CANLF Uncharacterized protein OS=Canis lupus familiaris PE=3 SV=2	1	3	3	3	17.1	18.579	170	8.642	174930000	1.40093	1.33691	1.21564	0.792012	0.908406	0.805742	0.00181891	1.57751
E2R273;F1PDT4	E2R273	tr|E2R273|E2R273_CANLF SH3 domain containing GRB2 like 1, endophilin A2 OS=Canis lupus familiaris GN=SH3GL1 PE=4 SV=2	2	6	6	6	14.4	43.557	389	10.152	464410000	1.31593	1.16804	1.25596	0.857114	0.594475	0.890602	0.0106333	1.59677
E2R2C3	E2R2C3	tr|E2R2C3|E2R2C3_CANLF Glucose-6-phosphate isomerase OS=Canis lupus familiaris GN=GPI PE=3 SV=1	1	11	11	11	21.3	62.837	558	39.476	5479800000	1.24599	1.15702	1.25774	0.948211	0.984768	0.849608	0.00469098	1.31559
E2R2G0	E2R2G0	tr|E2R2G0|E2R2G0_CANLF Chromosome 1 open reading frame 116 OS=Canis lupus familiaris GN=C1orf116 PE=4 SV=2	1	6	6	6	17.8	50.134	489	20.763	669580000	1.25255	1.19575	1.18286	0.918824	0.84044	0.905971	0.000573265	1.36242
E2R2I5;J9P1M6;J9NY44	E2R2I5;J9P1M6;J9NY44	tr|E2R2I5|E2R2I5_CANLF Ubiquitin conjugating enzyme E2 V1 OS=Canis lupus familiaris GN=UBE2V1 PE=3 SV=1;tr|J9P1M6|J9P1M6_CANLF Ubiquitin conjugating enzyme E2 V1 OS=Canis lupus familiaris GN=UBE2V1 PE=3 SV=1;tr|J9NY44|J9NY44_CANLF Ubiquitin conjugating enz	3	3	3	3	18.4	16.495	147	3.4068	759170000	1.33391	1.37239	1.27309	0.876922	0.861921	0.989418	0.0010901	1.45858
E2R2N2;F6XJ47;E2RIY9;E2QVF3	E2R2N2	tr|E2R2N2|E2R2N2_CANLF Mitogen-activated protein kinase OS=Canis lupus familiaris GN=MAPK1 PE=3 SV=1	4	16	16	12	48.6	41.389	360	56.124	3533600000	1.21196	1.17208	1.12711	0.975099	0.877713	0.963676	0.0041535	1.24664
E2R2R3	E2R2R3	tr|E2R2R3|E2R2R3_CANLF ArfGAP with dual PH domains 1 OS=Canis lupus familiaris GN=ADAP1 PE=4 SV=1	1	1	1	1	3.2	43.433	374	1.9579	111360000	0.915063	0.762038	0.796757	0.665851	0.644591	0.628145	0.019958	1.27611
E2R2S9	E2R2S9	tr|E2R2S9|E2R2S9_CANLF PDZ and LIM domain 7 OS=Canis lupus familiaris GN=PDLIM7 PE=4 SV=1	1	2	1	1	5	48.499	441	2.0884	113630000	1.24303	1.16885	1.47983	1.01012	0.747225	0.896187	0.0268479	1.46661
E2R2V4	E2R2V4	tr|E2R2V4|E2R2V4_CANLF Thimet oligopeptidase 1 OS=Canis lupus familiaris GN=THOP1 PE=3 SV=1	1	7	7	7	12.5	78.301	687	25.927	600750000	1.31192	1.2696	1.21665	0.967727	0.930165	1.07741	0.00621967	1.27657
E2R3G3	E2R3G3	tr|E2R3G3|E2R3G3_CANLF Protein-L-isoaspartate O-methyltransferase OS=Canis lupus familiaris GN=PCMT1 PE=3 SV=1	1	4	4	4	13.6	30.316	286	15.007	1084300000	1.12365	1.16661	1.23802	0.911731	0.848555	0.888856	0.00154099	1.33186
E2R3J1	E2R3J1	tr|E2R3J1|E2R3J1_CANLF Eukaryotic translation initiation factor 4A2 OS=Canis lupus familiaris GN=EIF4A2 PE=3 SV=1	1	14	4	4	35.6	46.402	407	14.887	1429700000	1.24921	1.23339	1.31546	0.850264	0.863048	0.850252	8.62275e-05	1.48156
E2R3U8	E2R3U8	tr|E2R3U8|E2R3U8_CANLF Uncharacterized protein OS=Canis lupus familiaris GN=MAD2L1 PE=4 SV=2	1	3	3	3	16.5	23.736	206	9.0446	659700000	1.22375	1.22368	1.25717	0.867197	0.9283	0.948891	0.000287693	1.34988
E2R3Y5;F1P6R6	E2R3Y5;F1P6R6	tr|E2R3Y5|E2R3Y5_CANLF AMP deaminase OS=Canis lupus familiaris GN=AMPD2 PE=3 SV=1;tr|F1P6R6|F1P6R6_CANLF AMP deaminase OS=Canis lupus familiaris GN=AMPD2 PE=3 SV=2	2	2	2	2	2.8	92.029	799	2.8402	35464000	1.30226	1.05992	1.12415	0.923144	0.791885	0.873693	0.0217669	1.34674
E2R412	E2R412	tr|E2R412|E2R412_CANLF Phosphodiesterase 12 OS=Canis lupus familiaris GN=PDE12 PE=4 SV=2	1	3	3	3	6.8	67.616	616	5.3178	342730000	1.30264	1.27289	1.12756	0.970893	0.899919	1.11679	0.0463767	1.23949
E2R413	E2R413	tr|E2R413|E2R413_CANLF Capping actin protein, gelsolin like OS=Canis lupus familiaris GN=CAPG PE=4 SV=2	1	11	11	11	42.4	38.826	349	138.96	27997000000	1.25987	1.22213	1.21922	0.937773	0.880527	0.830771	0.000474499	1.39718
E2R431;E2R557	E2R431	tr|E2R431|E2R431_CANLF S-adenosylmethionine synthase OS=Canis lupus familiaris GN=MAT2A PE=3 SV=1	2	14	14	14	41.5	43.674	395	47.108	14762000000	1.48388	1.45283	1.46073	0.719642	0.73852	0.705685	6.12713e-07	2.03224
E2R4S5	E2R4S5	tr|E2R4S5|E2R4S5_CANLF Malic enzyme OS=Canis lupus familiaris GN=ME2 PE=3 SV=2	1	7	7	7	12	65.346	584	16.404	750330000	1.13258	1.28057	1.09589	0.89927	0.891438	1.00321	0.0235906	1.25596
E2R507;J9PBK0;J9PB83;J9P3C7;J9NZ87;J9NVR3;F1P8F4;E2R974	E2R507	tr|E2R507|E2R507_CANLF Fatty acid binding protein 3 OS=Canis lupus familiaris GN=FABP3 PE=3 SV=1	8	9	9	9	63.9	14.805	133	47.586	22972000000	1.76595	1.61193	1.62974	0.576471	0.573344	0.612556	2.75301e-05	2.84141
E2R529	E2R529	tr|E2R529|E2R529_CANLF Ubiquitin like modifier activating enzyme 6 OS=Canis lupus familiaris GN=UBA6 PE=4 SV=2	1	8	8	8	8.4	117.92	1052	28.313	261190000	1.21549	1.19288	1.22383	1.04933	0.907903	1.05616	0.0137763	1.20535
E2R5P5	E2R5P5	tr|E2R5P5|E2R5P5_CANLF Protein S100 OS=Canis lupus familiaris GN=S100A6 PE=3 SV=1	1	3	3	3	24.4	10.039	90	4.2226	37076000000	1.60578	1.81687	1.6182	0.863701	0.532579	0.737423	0.00120821	2.36249
E2R5R9	E2R5R9	tr|E2R5R9|E2R5R9_CANLF UTP--glucose-1-phosphate uridylyltransferase OS=Canis lupus familiaris GN=UGP2 PE=3 SV=2	1	9	9	1	21.1	56.907	508	61.665	1188800000	1.21572	1.24204	1.32974	0.882434	0.826102	0.823275	0.000448299	1.49597
J9P8A6;E2R6L9;J9P954;J9P838	J9P8A6;E2R6L9;J9P954	tr|J9P8A6|J9P8A6_CANLF Importin subunit alpha OS=Canis lupus familiaris PE=3 SV=1;tr|E2R6L9|E2R6L9_CANLF Importin subunit alpha OS=Canis lupus familiaris GN=KPNA2 PE=3 SV=1;tr|J9P954|J9P954_CANLF Importin subunit alpha OS=Canis lupus familiaris PE=3 SV=1	4	8	8	8	20.6	57.929	529	64.192	3012400000	1.11518	1.15866	1.19274	0.768583	0.928369	0.919285	0.00738662	1.32503
E2R6W9;J9NW86	E2R6W9;J9NW86	tr|E2R6W9|E2R6W9_CANLF Ubiquitin conjugating enzyme E2 K OS=Canis lupus familiaris GN=UBE2K PE=3 SV=1;tr|J9NW86|J9NW86_CANLF Ubiquitin conjugating enzyme E2 K OS=Canis lupus familiaris GN=UBE2K PE=3 SV=1	2	7	7	7	42.5	22.406	200	26.451	1805700000	1.4635	1.38397	1.05895	0.923477	0.945454	0.916946	0.0395069	1.40222
E2R740	E2R740	tr|E2R740|E2R740_CANLF AMP deaminase OS=Canis lupus familiaris GN=AMPD3 PE=3 SV=1	1	2	2	2	2.5	88.861	767	4.0758	112420000	1.21973	1.52161	1.3012	0.90146	1.04328	0.819289	0.0186891	1.46255
E2R761;F1PIB3;J9JHZ0;J9NU05;J9P3N9;J9NT18;J9NVM0;J9NSR4;E2RLK0;H9N9H3;H9N9H2	E2R761;F1PIB3;J9JHZ0;J9NU05;J9P3N9;J9NT18	tr|E2R761|E2R761_CANLF L-lactate dehydrogenase OS=Canis lupus familiaris GN=LDHB PE=3 SV=1;tr|F1PIB3|F1PIB3_CANLF L-lactate dehydrogenase OS=Canis lupus familiaris GN=LDHB PE=3 SV=2;tr|J9JHZ0|J9JHZ0_CANLF L-lactate dehydrogenase OS=Canis lupus familiaris P	11	13	11	11	39.5	36.622	334	57.233	17267000000	1.27105	1.30962	1.24698	0.991952	0.869257	0.904488	0.000969544	1.38397
E2R7F1	E2R7F1	tr|E2R7F1|E2R7F1_CANLF Moesin OS=Canis lupus familiaris GN=MSN PE=4 SV=2	1	23	15	14	32.4	67.908	577	53.431	10724000000	1.18393	1.29005	1.18449	0.915274	0.915277	0.917696	0.00100566	1.3312
E2R7H9;E2RQ55	E2R7H9	tr|E2R7H9|E2R7H9_CANLF Ribonucleotide reductase regulatory subunit M2 OS=Canis lupus familiaris GN=RRM2 PE=4 SV=2	2	7	7	7	22.6	43.873	381	20.559	448470000	1.22724	1.46546	1.13373	0.789833	1.02742	0.848422	0.0337222	1.43545
E2R7N5;F1Q473	E2R7N5;F1Q473	tr|E2R7N5|E2R7N5_CANLF Coronin OS=Canis lupus familiaris GN=CORO1B PE=3 SV=1;tr|F1Q473|F1Q473_CANLF Coronin OS=Canis lupus familiaris GN=CORO1B PE=3 SV=2	2	7	7	7	17.4	54.208	489	36.991	2338600000	1.19735	1.22465	1.22984	1.05597	0.847819	1.01075	0.0184654	1.25297
E2R7T7	E2R7T7	tr|E2R7T7|E2R7T7_CANLF Transient receptor potential cation channel subfamily V member 4 OS=Canis lupus familiaris GN=TRPV4 PE=4 SV=1	1	4	4	4	18.2	23.864	209	6.0171	212490000	1.31868	1.27148	1.11174	0.918374	1.01102	0.694213	0.0334938	1.411
E2R857	E2R857	tr|E2R857|E2R857_CANLF Bleomycin hydrolase OS=Canis lupus familiaris GN=BLMH PE=4 SV=1	1	8	8	8	18.2	52.441	455	21.451	582310000	1.17114	1.18121	1.22682	0.984989	0.850694	0.896079	0.00277858	1.31021
E2R864;J9P1R5	E2R864;J9P1R5	tr|E2R864|E2R864_CANLF 3(2), 5-bisphosphate nucleotidase 1 OS=Canis lupus familiaris GN=BPNT1 PE=4 SV=1;tr|J9P1R5|J9P1R5_CANLF 3(2), 5-bisphosphate nucleotidase 1 OS=Canis lupus familiaris GN=BPNT1 PE=4 SV=1	2	12	12	12	46.8	33.45	308	52.807	3560900000	1.24645	1.28044	1.27316	0.927509	0.865747	0.84925	0.000119379	1.43805
E2R8E3	E2R8E3	tr|E2R8E3|E2R8E3_CANLF Uncharacterized protein OS=Canis lupus familiaris GN=DCTPP1 PE=4 SV=1	1	2	2	2	18.2	18.63	170	5.1343	121650000	1.26306	1.13718	1.0097	0.841285	0.797219	0.90499	0.022145	1.34065
E2R8P1	E2R8P1	tr|E2R8P1|E2R8P1_CANLF Ribonucleoside-diphosphate reductase OS=Canis lupus familiaris GN=RRM1 PE=3 SV=1	1	17	17	17	26.4	90.208	792	83.161	3812700000	1.21089	1.15942	1.19042	0.989714	0.908426	0.986617	0.00179335	1.23432
E2R8W3	E2R8W3	tr|E2R8W3|E2R8W3_CANLF Coiled-coil domain containing 22 OS=Canis lupus familiaris GN=CCDC22 PE=4 SV=1	1	5	5	5	13.6	70.797	627	15.386	183370000	1.37537	1.43375	1.32423	1.01292	0.879438	1.13942	0.0107572	1.36334
E2R8W7	E2R8W7	tr|E2R8W7|E2R8W7_CANLF Calcium binding protein 39 OS=Canis lupus familiaris GN=CAB39 PE=4 SV=1	1	8	8	7	22.3	39.871	341	24.143	1505700000	1.15155	1.42197	1.28845	1.06558	0.819531	0.890159	0.0276283	1.39157
E2R913	E2R913	tr|E2R913|E2R913_CANLF Calcium regulated heat stable protein 1 OS=Canis lupus familiaris GN=CARHSP1 PE=4 SV=1	1	2	2	2	12.3	16.616	154	8.0771	1387700000	1.26119	1.40067	1.38308	0.800219	0.80367	0.811782	0.000247408	1.67446
E2R9D7	E2R9D7	tr|E2R9D7|E2R9D7_CANLF DnaJ heat shock protein family (Hsp40) member B1 OS=Canis lupus familiaris GN=DNAJB1 PE=4 SV=1	1	4	4	4	16.2	38.16	340	18.26	793110000	1.15906	1.15621	1.13101	0.898453	0.896687	0.884737	1.34038e-05	1.28599
E2R9K5	E2R9K5	tr|E2R9K5|E2R9K5_CANLF Uncharacterized protein OS=Canis lupus familiaris GN=GGCT PE=4 SV=1	1	3	3	3	17.6	21.102	188	7.6527	194390000	1.46893	1.33717	1.15289	0.744943	0.678602	0.581083	0.00322866	1.97492
E2R9R2	E2R9R2	tr|E2R9R2|E2R9R2_CANLF Cytochrome c oxidase subunit OS=Canis lupus familiaris GN=LOC612644 PE=3 SV=2	1	4	4	4	43	10.142	86	15.525	12230000000	1.06159	1.09054	1.08116	0.890338	0.8034	0.971459	0.0184036	1.21315
E2RA22	E2RA22	tr|E2RA22|E2RA22_CANLF Proteasome 26S subunit, non-ATPase 10 OS=Canis lupus familiaris GN=PSMD10 PE=4 SV=1	1	2	2	2	13.3	24.525	226	9.1827	315690000	1.2252	1.20549	1.29498	1.07909	0.866591	0.953676	0.015008	1.285
E2RA27	E2RA27	tr|E2RA27|E2RA27_CANLF BCL2 associated athanogene 3 OS=Canis lupus familiaris GN=BAG3 PE=4 SV=1	1	12	12	12	30.4	61.891	579	56.018	3507400000	1.47498	1.40324	1.25584	0.751564	0.762348	0.669758	0.000781915	1.89317
E2RA30	E2RA30	tr|E2RA30|E2RA30_CANLF Chromosome 9 open reading frame 64 OS=Canis lupus familiaris GN=C9orf64 PE=4 SV=1	1	5	5	5	19.6	38.791	341	21.075	384230000	1.43123	1.55432	1.07434	0.955542	0.715015	0.970791	0.0465204	1.53705
E2RAB7	E2RAB7	tr|E2RAB7|E2RAB7_CANLF F-box protein 22 OS=Canis lupus familiaris GN=FBXO22 PE=4 SV=2	1	3	3	3	9.5	44.122	401	9.0871	245200000	1.49695	1.33051	1.1341	0.816218	0.697662	1.02111	0.0280691	1.56275
E2RAC6	E2RAC6	tr|E2RAC6|E2RAC6_CANLF ATPase H+ transporting V1 subunit B2 OS=Canis lupus familiaris GN=ATP6V1B2 PE=3 SV=2	1	10	10	8	22.1	56.578	511	27.68	3198900000	1.30445	1.20992	1.1556	0.932081	0.924931	0.880131	0.00258627	1.3408
E2RAF1;J9NZ48;J9P1U9;E2RQ77	E2RAF1;J9NZ48	tr|E2RAF1|E2RAF1_CANLF Uncharacterized protein OS=Canis lupus familiaris GN=HYPK PE=3 SV=1;tr|J9NZ48|J9NZ48_CANLF Uncharacterized protein OS=Canis lupus familiaris GN=HYPK PE=3 SV=1	4	3	3	3	9.8	47.075	417	18.23	185330000	1.02045	1.36172	1.18135	0.877766	0.915328	0.753166	0.0369205	1.39951
F1PNB8;E2RAU6;J9NZM5	F1PNB8;E2RAU6	tr|F1PNB8|F1PNB8_CANLF Uncharacterized protein OS=Canis lupus familiaris GN=AKR1B1 PE=4 SV=2;tr|E2RAU6|E2RAU6_CANLF Uncharacterized protein OS=Canis lupus familiaris GN=AKR1B1 PE=4 SV=2	3	6	6	6	21.2	35.697	316	17.877	922100000	1.25172	1.19252	1.26219	0.897908	0.875424	0.80716	0.000421855	1.43633
E2RBS1;E1UGY9	E2RBS1	tr|E2RBS1|E2RBS1_CANLF Carbonic anhydrase 4 OS=Canis lupus familiaris GN=CA4 PE=4 SV=1	2	5	5	5	24.7	35.209	312	23.179	1285300000	1.36915	1.28885	1.39621	0.802507	0.642538	0.624827	0.000526998	1.95867
E2RC20;Q50KA8	E2RC20;Q50KA8	tr|E2RC20|E2RC20_CANLF Nucleoside diphosphate kinase OS=Canis lupus familiaris GN=NME1 PE=3 SV=2;sp|Q50KA8|NDKB_CANLF Nucleoside diphosphate kinase B OS=Canis lupus familiaris GN=NME2 PE=2 SV=1	2	17	17	8	61	32.732	292	47.063	41294000000	1.3242	1.37733	1.23201	0.876211	0.758627	0.936656	0.00252161	1.52967
E2RC43	E2RC43	tr|E2RC43|E2RC43_CANLF THO complex 3 OS=Canis lupus familiaris GN=THOC3 PE=4 SV=1	1	2	2	2	5.4	38.783	351	5.4126	52749000	1.24714	1.10779	1.1752	0.908177	0.884842	0.861423	0.00234107	1.3299
E2RC92;E2RC90	E2RC92	tr|E2RC92|E2RC92_CANLF Prefoldin subunit 5 OS=Canis lupus familiaris GN=PFDN5 PE=3 SV=1	2	3	3	3	24.7	17.394	154	9.7244	328340000	1.13683	1.28636	1.19641	1.0348	1.00897	0.881862	0.0227052	1.23721
E2RCI8	E2RCI8	tr|E2RCI8|E2RCI8_CANLF Annexin OS=Canis lupus familiaris GN=ANXA6 PE=3 SV=2	1	29	29	29	43.8	76.168	674	100.78	18352000000	1.4326	1.40311	1.39212	0.81368	0.759374	0.782672	6.08426e-06	1.7947
E2RCN0	E2RCN0	tr|E2RCN0|E2RCN0_CANLF Thiosulfate sulfurtransferase like domain containing 1 OS=Canis lupus familiaris GN=TSTD1 PE=4 SV=2	1	2	2	2	15.7	12.303	115	5.5319	405380000	1.26606	1.22007	1.15138	0.948155	0.854168	0.95989	0.00348495	1.31688
E2RCQ9	E2RCQ9	tr|E2RCQ9|E2RCQ9_CANLF S-formylglutathione hydrolase OS=Canis lupus familiaris GN=ESD PE=3 SV=1	1	6	6	6	31.9	31.392	282	51.804	1217600000	1.15993	1.23423	1.14333	0.922915	0.86923	0.846891	0.00113078	1.34045
E2RCY8	E2RCY8	tr|E2RCY8|E2RCY8_CANLF Aconitate hydratase, mitochondrial OS=Canis lupus familiaris GN=ACO2 PE=3 SV=1	1	24	24	24	35.9	85.721	781	116.95	20544000000	1.12069	1.07193	1.1701	0.862765	0.867228	0.871828	0.000876588	1.29245
E2RDJ1	E2RDJ1	tr|E2RDJ1|E2RDJ1_CANLF Uncharacterized protein OS=Canis lupus familiaris GN=RPL7L1 PE=4 SV=1	1	1	1	1	6.5	28.883	247	5.4834	931990000	1.1317	1.1057	1.03559	0.887485	0.830598	0.944729	0.00962657	1.22915
E2RDN1;J9JHU3	E2RDN1;J9JHU3	tr|E2RDN1|E2RDN1_CANLF Phosphoserine aminotransferase OS=Canis lupus familiaris GN=PSAT1 PE=3 SV=2;tr|J9JHU3|J9JHU3_CANLF Phosphoserine aminotransferase OS=Canis lupus familiaris GN=PSAT1 PE=3 SV=1	2	11	11	11	29	45.27	411	34.37	2283000000	1.26699	1.35401	1.39958	0.8105	0.846932	0.777695	0.000268991	1.65107
E2REC1	E2REC1	tr|E2REC1|E2REC1_CANLF Serpin family B member 5 OS=Canis lupus familiaris GN=SERPINB5 PE=3 SV=2	1	10	10	10	34.9	43.462	387	68.831	2930300000	1.53752	1.3936	1.17724	0.652764	0.662114	0.685146	0.0026052	2.05416
E2RF18	E2RF18	tr|E2RF18|E2RF18_CANLF NADH-cytochrome b5 reductase OS=Canis lupus familiaris GN=CYB5R1 PE=3 SV=1	1	10	10	10	34.1	33.943	305	26.965	2755800000	1.30746	1.24956	1.27696	0.693071	0.765123	0.715728	3.37597e-05	1.76363
E2RF42	E2RF42	tr|E2RF42|E2RF42_CANLF Amidophosphoribosyltransferase OS=Canis lupus familiaris GN=PPAT PE=3 SV=1	1	7	7	7	17.6	57.179	517	20.321	1259500000	1.30765	1.31596	1.22477	0.904511	0.908631	0.897073	0.000205381	1.41996
E2RF46	E2RF46	tr|E2RF46|E2RF46_CANLF Asparagine synthetase (glutamine-hydrolyzing) OS=Canis lupus familiaris GN=ASNS PE=4 SV=2	1	14	14	14	26	64.422	561	36.543	3134400000	1.18357	1.26354	1.08844	0.939507	0.928366	0.922761	0.00814181	1.26693
E2RFE1	E2RFE1	tr|E2RFE1|E2RFE1_CANLF Integrin beta OS=Canis lupus familiaris PE=3 SV=2	1	23	23	23	26.6	113.2	1009	137.3	6834100000	1.12405	1.09285	1.12079	0.899583	0.910441	0.881559	7.77106e-05	1.24005
E2RFF7	E2RFF7	tr|E2RFF7|E2RFF7_CANLF Tyrosine-protein kinase OS=Canis lupus familiaris GN=CSK PE=3 SV=2	1	6	6	6	16.2	50.584	450	13.516	391640000	1.24255	1.34815	1.19903	0.94086	0.841538	0.905255	0.00226741	1.41005
E2RFR8	E2RFR8	tr|E2RFR8|E2RFR8_CANLF Tyrosine-protein phosphatase non-receptor type OS=Canis lupus familiaris GN=PTPN6 PE=3 SV=2	1	1	1	1	2.4	67.687	595	2.2365	106390000	1.29384	1.53458	1.28957	0.824038	0.892085	0.856794	0.00348017	1.60051
E2RFY9	E2RFY9	tr|E2RFY9|E2RFY9_CANLF Adenylate kinase 4, mitochondrial OS=Canis lupus familiaris GN=AK4 PE=3 SV=2	1	5	5	5	22.4	25.392	223	12.255	303790000	1.39365	1.29819	1.18129	0.79929	0.694543	0.97805	0.0105594	1.56688
E2RGD3	E2RGD3	tr|E2RGD3|E2RGD3_CANLF Twinfilin actin binding protein 2 OS=Canis lupus familiaris GN=TWF2 PE=4 SV=2	1	10	8	8	26.9	39.469	349	44.829	1586600000	1.17875	1.26873	1.13069	1.05094	0.88195	1.00905	0.0309234	1.21626
E2RGG9	E2RGG9	tr|E2RGG9|E2RGG9_CANLF Tryptophanyl-tRNA synthetase OS=Canis lupus familiaris GN=WARS PE=3 SV=1	1	9	9	9	25	53.871	476	80.173	4264600000	1.27515	1.20156	1.26118	0.991414	1.00389	0.855919	0.00489034	1.31098
E2RGH5;J9P920;S5U8H7;S5U7Q4	E2RGH5;J9P920	tr|E2RGH5|E2RGH5_CANLF Ubiquitin like modifier activating enzyme 1 OS=Canis lupus familiaris GN=UBA1 PE=3 SV=2;tr|J9P920|J9P920_CANLF Ubiquitin like modifier activating enzyme 1 OS=Canis lupus familiaris GN=UBA1 PE=3 SV=1	4	22	22	13	23.6	117.23	1057	323.31	19033000000	1.18704	1.14138	1.15455	0.974856	0.925096	0.966817	0.000562291	1.21494
L7N0B7;E2RGI4	L7N0B7;E2RGI4	tr|L7N0B7|L7N0B7_CANLF Chloride intracellular channel protein OS=Canis lupus familiaris GN=CLIC4 PE=3 SV=1;tr|E2RGI4|E2RGI4_CANLF Chloride intracellular channel protein OS=Canis lupus familiaris GN=CLIC4 PE=3 SV=1	2	7	7	7	24.9	28.844	253	18.428	1235700000	1.37766	1.18824	1.0617	0.734252	0.848152	0.716799	0.0116865	1.57777
E2RGP2;J9NZ77	E2RGP2	tr|E2RGP2|E2RGP2_CANLF Serpin family B member 6 OS=Canis lupus familiaris GN=SERPINB6 PE=3 SV=2	2	9	9	9	30.5	42.615	380	63.165	4192400000	1.2162	1.16304	1.37578	0.885951	0.916911	0.759728	0.00765329	1.46533
F1P6U4;U5XYR4;U5XY96;E2RGZ3;J9NYF5;E2JCD1	F1P6U4;U5XYR4;U5XY96;E2RGZ3;J9NYF5	tr|F1P6U4|F1P6U4_CANLF Insulin degrading enzyme OS=Canis lupus familiaris GN=IDE PE=3 SV=2;tr|U5XYR4|U5XYR4_CANLF Insulin-degrading protein enzyme 15b OS=Canis lupus familiaris GN=IDE PE=2 SV=1;tr|U5XY96|U5XY96_CANLF Insulin-degrading enzyme isoform 15a OS	6	17	17	17	19.7	104.33	902	41.313	1518000000	1.14018	1.18885	1.08411	0.888915	0.8141	0.909573	0.00312104	1.30642
E2RND9;E2RH37;F1PM22	E2RND9;E2RH37;F1PM22	tr|E2RND9|E2RND9_CANLF GTP:AMP phosphotransferase AK3, mitochondrial OS=Canis lupus familiaris GN=AK3 PE=3 SV=2;tr|E2RH37|E2RH37_CANLF GTP:AMP phosphotransferase AK3, mitochondrial OS=Canis lupus familiaris GN=LOC480491 PE=3 SV=1;tr|F1PM22|F1PM22_CANLF GTP	3	7	7	3	32.2	25.419	227	32.337	2025500000	1.1095	1.1494	1.15069	0.890593	0.901228	0.945811	0.000492926	1.24545
E2RHG2;J9P7L3	E2RHG2	tr|E2RHG2|E2RHG2_CANLF Uncharacterized protein OS=Canis lupus familiaris GN=PRDX1 PE=4 SV=1	2	13	13	9	60.8	22.124	199	62.777	175000000000	1.2088	1.24855	1.19517	0.942825	0.955275	0.81731	0.00263545	1.34511
E2RHJ7	E2RHJ7	tr|E2RHJ7|E2RHJ7_CANLF Golgi reassembly stacking protein 2 OS=Canis lupus familiaris GN=GORASP2 PE=4 SV=1	1	7	7	7	25.1	47.805	459	45.878	1416300000	1.30389	1.25874	1.38001	1.06918	0.9923	0.923802	0.00436357	1.32069
E2RHK9;J9P3T9	E2RHK9;J9P3T9	tr|E2RHK9|E2RHK9_CANLF RAN binding protein 1 OS=Canis lupus familiaris GN=RANBP1 PE=4 SV=2;tr|J9P3T9|J9P3T9_CANLF RAN binding protein 1 OS=Canis lupus familiaris GN=RANBP1 PE=4 SV=1	2	5	5	5	34.4	24.095	209	21.525	1766400000	1.22889	1.1478	1.24854	0.990858	0.863232	0.960157	0.00538357	1.28817
E2RHR7	E2RHR7	tr|E2RHR7|E2RHR7_CANLF Tyrosine--tRNA ligase OS=Canis lupus familiaris GN=YARS PE=3 SV=2	1	16	16	16	30.1	63.023	564	43.84	2240000000	1.22759	1.32937	1.21011	0.935757	0.871752	0.912734	0.00110828	1.38483
E2RHW7	E2RHW7	tr|E2RHW7|E2RHW7_CANLF Threonyl-tRNA synthetase OS=Canis lupus familiaris GN=TARS PE=3 SV=1	1	12	12	11	18	83.652	723	30.236	1755200000	1.24886	1.20981	1.1764	0.862297	0.840465	0.978514	0.00262981	1.35572
E2RHZ8	E2RHZ8	tr|E2RHZ8|E2RHZ8_CANLF ATPase H+ transporting V1 subunit H OS=Canis lupus familiaris GN=ATP6V1H PE=4 SV=1	1	6	6	6	16.8	55.835	483	36.424	1100000000	1.20707	1.14762	1.09004	0.882211	0.820888	0.881829	0.00190761	1.33262
E2RI17;J9P758	E2RI17;J9P758	tr|E2RI17|E2RI17_CANLF Uncharacterized protein OS=Canis lupus familiaris PE=4 SV=2;tr|J9P758|J9P758_CANLF Uncharacterized protein OS=Canis lupus familiaris PE=4 SV=1	2	3	3	3	14.5	24.198	221	7.289	327760000	1.15394	1.28309	1.21218	0.919418	0.938534	0.903411	0.00157041	1.32153
F1PRU1;E2RII4	F1PRU1;E2RII4	tr|F1PRU1|F1PRU1_CANLF Echinoderm microtubule associated protein like 2 OS=Canis lupus familiaris GN=EML2 PE=4 SV=2;tr|E2RII4|E2RII4_CANLF Echinoderm microtubule associated protein like 2 OS=Canis lupus familiaris GN=EML2 PE=4 SV=2	2	11	11	11	20.3	70.615	649	65.519	2386500000	1.22118	1.13674	1.05795	0.969509	0.85132	0.958943	0.0246483	1.22883
E2RIL1	E2RIL1	tr|E2RIL1|E2RIL1_CANLF Spectrin repeat containing nuclear envelope family member 3 OS=Canis lupus familiaris GN=SYNE3 PE=4 SV=2	1	7	7	7	9.1	105.27	917	14.142	469170000	1.23149	1.22459	1.16746	0.861041	0.904921	0.958741	0.000998594	1.32988
E2RIQ2	E2RIQ2	tr|E2RIQ2|E2RIQ2_CANLF Cortactin OS=Canis lupus familiaris GN=CTTN PE=4 SV=2	1	12	12	12	24	60.571	541	36.367	2280400000	1.23863	1.32608	1.17233	0.86814	0.663018	0.902111	0.00749942	1.53581
E2RIW6	E2RIW6	tr|E2RIW6|E2RIW6_CANLF Phosphoribosyl pyrophosphate synthetase associated protein 2 OS=Canis lupus familiaris GN=PRPSAP2 PE=4 SV=2	1	4	4	4	14.8	39.677	359	27.58	414520000	1.22224	1.33329	1.18332	0.885006	0.974345	0.864257	0.00383332	1.37276
E2RJA0;E2RA66;E2REH3;E2REG4	E2RJA0	tr|E2RJA0|E2RJA0_CANLF p21 (RAC1) activated kinase 2 OS=Canis lupus familiaris GN=PAK2 PE=4 SV=1	4	12	12	12	28.4	57.969	524	51.193	1202800000	1.27807	1.14675	1.08371	0.940488	0.996692	0.79466	0.0356527	1.28431
E2RJL1;J9P5U3;J9P859	E2RJL1;J9P5U3;J9P859	tr|E2RJL1|E2RJL1_CANLF Galectin OS=Canis lupus familiaris GN=LGALS1 PE=2 SV=1;tr|J9P5U3|J9P5U3_CANLF Galectin OS=Canis lupus familiaris GN=LGALS1 PE=4 SV=1;tr|J9P859|J9P859_CANLF Galectin OS=Canis lupus familiaris PE=4 SV=1	3	7	7	7	58.5	14.733	135	27.68	8425900000	1.04543	1.25439	1.23237	0.945756	0.838846	0.973723	0.0297293	1.28055
E2RKJ6	E2RKJ6	tr|E2RKJ6|E2RKJ6_CANLF Serpin family B member 1 OS=Canis lupus familiaris GN=SERPINB1 PE=3 SV=1	1	10	10	10	28.3	42.817	378	42.356	4425200000	1.2255	1.36349	1.16392	0.874407	0.867386	0.890559	0.003267	1.42569
E2RKN3	E2RKN3	tr|E2RKN3|E2RKN3_CANLF Coiled-coil-helix-coiled-coil-helix domain containing 2 OS=Canis lupus familiaris GN=CHCHD2 PE=4 SV=2	1	2	2	2	21.7	15.741	152	22.883	193410000	1.11321	0.927797	1.10728	0.871426	0.845503	0.690872	0.040894	1.30754
E2RKT9	E2RKT9	tr|E2RKT9|E2RKT9_CANLF Ubiquitin conjugating enzyme E2 L5, pseudogene OS=Canis lupus familiaris GN=UBE2L5P PE=3 SV=1	1	3	3	3	16.2	17.861	154	5.3908	1387900000	1.29491	1.42922	1.47774	0.904095	0.716524	0.943622	0.00356092	1.63864
E2RL01;F1PZY2	E2RL01	tr|E2RL01|E2RL01_CANLF Uncharacterized protein OS=Canis lupus familiaris GN=ACACA PE=4 SV=2	2	24	24	24	11.9	265.49	2346	64.217	1809200000	1.23093	1.18455	1.16491	0.817864	0.923959	0.874593	0.000905674	1.36843
E2RLB3	E2RLB3	tr|E2RLB3|E2RLB3_CANLF Peptidylprolyl isomerase OS=Canis lupus familiaris GN=FKBP5 PE=4 SV=1	1	13	13	13	28.1	51.032	456	61.533	4231900000	1.28798	1.43262	1.15397	0.848961	0.854217	0.837788	0.00527597	1.52484
E2RLF1	E2RLF1	tr|E2RLF1|E2RLF1_CANLF Prosaposin OS=Canis lupus familiaris GN=PSAP PE=4 SV=1	1	2	2	2	3.8	57.983	524	5.0767	77234000	1.0962	1.29596	1.49948	1.03976	0.81503	0.644827	0.0467134	1.5569
E2RLQ6	E2RLQ6	tr|E2RLQ6|E2RLQ6_CANLF 6-phosphogluconolactonase OS=Canis lupus familiaris GN=PGLS PE=4 SV=1	1	7	7	7	39.9	27.5	258	31.968	1134000000	1.19796	1.15018	1.17114	0.901488	0.821443	0.795158	0.000663519	1.3976
E2RLU9	E2RLU9	tr|E2RLU9|E2RLU9_CANLF Quinoid dihydropteridine reductase OS=Canis lupus familiaris GN=QDPR PE=4 SV=1	1	6	6	6	34.3	25.602	242	26.744	784700000	1.06448	1.1585	1.07772	0.934497	0.798917	0.919082	0.0141648	1.24438
E2RLZ8	E2RLZ8	tr|E2RLZ8|E2RLZ8_CANLF Meningioma expressed antigen 5 (hyaluronidase) OS=Canis lupus familiaris GN=MGEA5 PE=4 SV=1	1	3	3	3	3.7	102.92	916	5.6508	149490000	1.22115	1.0806	1.22405	0.825216	0.471483	0.719297	0.0119142	1.74891
E2RLZ9	E2RLZ9	tr|E2RLZ9|E2RLZ9_CANLF Abhydrolase domain containing 14B OS=Canis lupus familiaris GN=ABHD14B PE=4 SV=1	1	3	3	3	14.3	22.311	210	8.56	683320000	1.45697	1.25832	1.48386	0.815522	0.834757	0.708558	0.00164795	1.78018
E2RM30	E2RM30	tr|E2RM30|E2RM30_CANLF Tissue specific transplantation antigen P35B OS=Canis lupus familiaris GN=TSTA3 PE=3 SV=1	1	7	7	7	27.7	35.863	321	27.478	1981500000	1.21688	1.237	1.04965	0.955421	0.994028	0.892589	0.0292644	1.23275
E2RM54	E2RM54	tr|E2RM54|E2RM54_CANLF Polypeptide N-acetylgalactosaminyltransferase OS=Canis lupus familiaris GN=GALNT1 PE=3 SV=2	1	3	3	3	5	64.204	559	7.0453	215150000	1.26813	1.3004	1.11684	0.875893	0.839844	0.796311	0.00305545	1.46708
E2RMA1;F1PK55;J9P3B9	E2RMA1	tr|E2RMA1|E2RMA1_CANLF Tumor protein, translationally-controlled 1 OS=Canis lupus familiaris GN=TPT1 PE=3 SV=1	3	5	5	5	28.5	19.595	172	15.934	14898000000	1.34684	1.35442	1.2671	0.915754	0.906125	0.798078	0.000664446	1.51467
E2RMB9	E2RMB9	tr|E2RMB9|E2RMB9_CANLF N-Myc downstream regulated gene 1 OS=Canis lupus familiaris GN=NDRG1 PE=2 SV=1	1	8	8	7	30.2	41.736	384	44.175	4495300000	1.11228	1.138	1.25813	0.965614	0.915096	0.856657	0.00942381	1.28167
E2RMC1	E2RMC1	tr|E2RMC1|E2RMC1_CANLF Uncharacterized protein OS=Canis lupus familiaris GN=ST13 PE=4 SV=2	1	8	8	8	23.9	44.146	393	29.825	10881000000	1.0539	1.13116	1.27309	0.925685	0.944417	0.95501	0.0311217	1.22408
J9NT98;E2RN79	J9NT98;E2RN79	tr|J9NT98|J9NT98_CANLF Myosin XIX OS=Canis lupus familiaris GN=MYO19 PE=3 SV=1;tr|E2RN79|E2RN79_CANLF Myosin XIX OS=Canis lupus familiaris GN=MYO19 PE=3 SV=2	2	4	4	4	4	107.35	960	4.701	6186400000	1.02422	1.12752	1.15347	0.95126	0.681112	0.856054	0.0369485	1.32824
E2RN98	E2RN98	tr|E2RN98|E2RN98_CANLF Mitochondrial ribosomal protein L43 OS=Canis lupus familiaris GN=MRPL43 PE=4 SV=1	1	2	2	2	8.4	28.474	261	10.333	283790000	1.15268	1.11691	1.16464	0.92184	0.892775	0.839913	0.000743216	1.29372
E2RNB6	E2RNB6	tr|E2RNB6|E2RNB6_CANLF Crystallin alpha B OS=Canis lupus familiaris GN=CRYAB PE=3 SV=1	1	5	5	5	38.3	20.067	175	23.639	763260000	1.63198	1.37929	1.32927	0.513886	0.704481	0.742622	0.00250261	2.21345
E2RNC3;B4YUE1;F1PAK1;B4YUE0;F1PFB8;F1PFB9;B4YY01;J9NUZ0	E2RNC3	tr|E2RNC3|E2RNC3_CANLF Dynamin 2 OS=Canis lupus familiaris GN=DNM2 PE=3 SV=2	8	17	17	17	20.8	98.277	870	89.216	2647500000	1.2683	1.20814	1.19256	0.920265	0.899382	0.852733	0.000404689	1.37293
E2RNS3;J9JHL5	E2RNS3;J9JHL5	tr|E2RNS3|E2RNS3_CANLF Enoyl-CoA hydratase and 3-hydroxyacyl CoA dehydrogenase OS=Canis lupus familiaris GN=EHHADH PE=3 SV=2;tr|J9JHL5|J9JHL5_CANLF Enoyl-CoA hydratase and 3-hydroxyacyl CoA dehydrogenase OS=Canis lupus familiaris GN=EHHADH PE=4 SV=1	2	13	13	13	20.9	79.628	723	29.115	889020000	1.10614	1.05302	1.00818	0.891324	0.85979	0.882968	0.003987	1.20245
E2RNV4	E2RNV4	tr|E2RNV4|E2RNV4_CANLF Heme binding protein 1 OS=Canis lupus familiaris GN=HEBP1 PE=4 SV=1	1	6	6	6	43.4	21.035	189	24.414	583800000	1.29878	1.23078	1.27877	0.904613	0.68061	0.918529	0.00548095	1.52105
E2RPG9	E2RPG9	tr|E2RPG9|E2RPG9_CANLF Coatomer subunit gamma OS=Canis lupus familiaris GN=COPG1 PE=3 SV=2	1	21	21	18	28.9	97.75	874	133.96	6895500000	1.1412	1.18394	1.1743	0.968336	0.90214	0.868046	0.00139777	1.27786
E2RPH0	E2RPH0	tr|E2RPH0|E2RPH0_CANLF Nudix hydrolase 9 OS=Canis lupus familiaris GN=NUDT9 PE=4 SV=2	1	2	2	2	7.4	38.837	350	5.1504	215720000	1.501	1.24994	1.5587	0.82046	0.872342	0.780739	0.0034039	1.7423
E2RPP1;Q867A1	E2RPP1;Q867A1	tr|E2RPP1|E2RPP1_CANLF Laminin subunit alpha 3 OS=Canis lupus familiaris GN=LAMA3 PE=4 SV=2;tr|Q867A1|Q867A1_CANLF Laminin alpha 3 (Fragment) OS=Canis lupus familiaris PE=2 SV=1	2	12	12	12	4.1	367.68	3337	29.943	829410000	1.19244	1.17195	1.20581	0.784092	0.890306	0.7189	0.00152653	1.49175
E2RPZ9;J9P9K7;F1PMS5	E2RPZ9	tr|E2RPZ9|E2RPZ9_CANLF Glycylpeptide N-tetradecanoyltransferase OS=Canis lupus familiaris GN=NMT1 PE=3 SV=1	3	5	5	5	9.3	56.773	496	9.5677	629320000	1.19458	1.15723	1.23366	0.877062	0.872231	0.94247	0.000707757	1.33202
E2RQ04	E2RQ04	tr|E2RQ04|E2RQ04_CANLF Proline rich coiled-coil 1 OS=Canis lupus familiaris GN=PRRC1 PE=4 SV=2	1	1	1	1	2.1	44.116	420	2.7123	140610000	1.17447	1.16773	1.30879	0.872246	0.830401	0.805057	0.00158394	1.45591
E2RQ14	E2RQ14	tr|E2RQ14|E2RQ14_CANLF Annexin OS=Canis lupus familiaris GN=ANXA5 PE=2 SV=2	1	12	12	12	38	35.943	321	323.31	26109000000	1.63746	1.47587	1.40021	0.605699	0.727696	0.635185	0.000427006	2.29279
E2RQD3	E2RQD3	tr|E2RQD3|E2RQD3_CANLF Kynurenine aminotransferase 1 OS=Canis lupus familiaris GN=KYAT1 PE=4 SV=2	1	6	6	6	12.5	58.476	519	20.67	1261100000	1.39786	1.16583	1.42298	0.594828	0.725328	0.757895	0.00267081	1.91847
E2RQG8	E2RQG8	tr|E2RQG8|E2RQG8_CANLF Eukaryotic translation initiation factor 4H OS=Canis lupus familiaris GN=EIF4H PE=4 SV=2	1	4	4	4	19.5	27.737	251	24.502	2375400000	1.47327	1.48387	1.37096	0.829586	0.991603	0.672623	0.00347467	1.73553
E2RQR4	E2RQR4	tr|E2RQR4|E2RQR4_CANLF LanC like 1 OS=Canis lupus familiaris GN=LANCL1 PE=4 SV=1	1	3	3	3	8.5	45.44	399	8.4734	606150000	1.1857	1.26954	1.10628	0.832616	0.807898	0.783381	0.00152882	1.46934
E2RQU4;F1PIL4;F1PV71	E2RQU4;F1PIL4	tr|E2RQU4|E2RQU4_CANLF Ribosomal protein S6 kinase OS=Canis lupus familiaris GN=RPS6KA1 PE=3 SV=2;tr|F1PIL4|F1PIL4_CANLF Ribosomal protein S6 kinase A1 OS=Canis lupus familiaris GN=RPS6KA1 PE=4 SV=2	3	10	10	7	16.9	83.933	744	31.104	901180000	1.24218	1.08864	1.23742	0.919174	0.798012	0.815271	0.00540637	1.409
E2RR68	E2RR68	tr|E2RR68|E2RR68_CANLF Family with sequence similarity 129 member B OS=Canis lupus familiaris GN=FAM129B PE=4 SV=1	1	12	12	12	16.9	84.324	745	40.199	3503100000	1.23831	1.26892	1.18386	0.999242	0.965337	0.96473	0.000750004	1.26006
E2RRC9	E2RRC9	tr|E2RRC9|E2RRC9_CANLF Phosphoglycerate kinase OS=Canis lupus familiaris GN=PGK1 PE=3 SV=1	1	21	21	21	60	44.462	417	199.09	29338000000	1.34527	1.34972	1.36213	0.805844	0.766521	0.758654	3.09902e-06	1.74049
E2RRN0;J9P4C3	E2RRN0;J9P4C3	tr|E2RRN0|E2RRN0_CANLF SEC24 homolog A, COPII coat complex component OS=Canis lupus familiaris GN=SEC24A PE=4 SV=2;tr|J9P4C3|J9P4C3_CANLF SEC24 homolog A, COPII coat complex component OS=Canis lupus familiaris GN=SEC24A PE=4 SV=1	2	2	2	2	1.7	119.56	1091	3.1577	268720000	1.37906	1.27028	1.18971	0.973388	0.87267	1.00935	0.00870367	1.34449
E2RRP1	E2RRP1	tr|E2RRP1|E2RRP1_CANLF Isovaleryl-CoA dehydrogenase OS=Canis lupus familiaris GN=IVD PE=3 SV=1	1	11	11	11	32.9	46.434	423	68.833	3009200000	1.11417	1.17495	1.1234	0.81873	0.869685	0.79012	0.000485734	1.37683
E2RRQ3	E2RRQ3	tr|E2RRQ3|E2RRQ3_CANLF Secretion associated Ras related GTPase 1B OS=Canis lupus familiaris GN=SAR1B PE=3 SV=1	1	5	5	2	25.3	22.423	198	13.893	1183400000	1.22646	1.20142	1.26409	0.97581	0.994869	0.940859	0.000419226	1.26805
E2RRY7	E2RRY7	tr|E2RRY7|E2RRY7_CANLF Uridine monophosphate synthetase OS=Canis lupus familiaris GN=UMPS PE=3 SV=1	1	10	10	9	21.9	52.417	480	16.983	1077800000	1.2661	1.20707	1.31324	0.97427	0.979934	1.015	0.00120948	1.27522
E2RSF2	E2RSF2	tr|E2RSF2|E2RSF2_CANLF Superoxide dismutase OS=Canis lupus familiaris GN=SOD2 PE=3 SV=1	1	5	5	5	23	24.845	222	11.798	4223900000	1.155	1.06739	1.24117	0.830974	0.848016	0.732763	0.00473384	1.43612
E2RSF6;J9NWP6;E2RNQ7;J9P2Y8;J9NXN8	E2RSF6;J9NWP6;E2RNQ7;J9P2Y8	tr|E2RSF6|E2RSF6_CANLF Uncharacterized protein OS=Canis lupus familiaris GN=ARF1 PE=3 SV=1;tr|J9NWP6|J9NWP6_CANLF Uncharacterized protein OS=Canis lupus familiaris GN=LOC480487 PE=3 SV=1;tr|E2RNQ7|E2RNQ7_CANLF Uncharacterized protein OS=Canis lupus familia	5	8	8	4	57.5	20.601	181	64.713	15512000000	1.23413	1.1188	1.2902	0.938641	1.03524	0.827499	0.0231974	1.30048
E2RSI6	E2RSI6	tr|E2RSI6|E2RSI6_CANLF Ezrin OS=Canis lupus familiaris GN=EZR PE=4 SV=1	1	31	31	21	46.8	69.422	586	162.71	244000000000	1.40028	1.31903	1.29715	0.805909	0.829491	0.746347	0.000167399	1.68635
E2RSQ9	E2RSQ9	tr|E2RSQ9|E2RSQ9_CANLF Dihydropyrimidine dehydrogenase [NADP(+)] OS=Canis lupus familiaris GN=DPYD PE=3 SV=2	1	3	3	3	3.8	112.05	1029	6.7376	105240000	1.28073	1.25301	1.24765	0.897214	0.868863	0.687886	0.00262874	1.54093
E2RSU7	E2RSU7	tr|E2RSU7|E2RSU7_CANLF Activator of HSP90 ATPase activity 1 OS=Canis lupus familiaris GN=AHSA1 PE=4 SV=1	1	9	9	9	29.9	38.293	338	36.826	4334500000	1.06714	1.13634	1.10287	0.892111	0.900078	0.927356	0.000988828	1.21577
E2RSV0	E2RSV0	tr|E2RSV0|E2RSV0_CANLF Importin 4 OS=Canis lupus familiaris GN=IPO4 PE=4 SV=2	1	5	5	5	4.6	118.09	1079	7.6021	360080000	1.1755	1.23259	1.30289	0.990098	0.972414	0.892286	0.00388395	1.29991
E2RT65;H9GW55	E2RT65	tr|E2RT65|E2RT65_CANLF Phosphoglycerate mutase OS=Canis lupus familiaris GN=PGAM1 PE=3 SV=2	2	13	13	13	70.1	28.822	254	113.26	25792000000	1.33436	1.22083	1.17708	0.903085	0.887954	0.902352	0.00182681	1.38572
J9P4J0;E2RT71	J9P4J0;E2RT71	tr|J9P4J0|J9P4J0_CANLF Nardilysin convertase OS=Canis lupus familiaris GN=NRDC PE=3 SV=1;tr|E2RT71|E2RT71_CANLF Nardilysin convertase OS=Canis lupus familiaris GN=NRDC PE=4 SV=2	2	6	6	6	6	132.39	1159	23.719	375780000	1.07672	1.16136	1.11997	0.899894	0.865413	1.00515	0.015748	1.21209
E2RT80;E2RT72	E2RT80;E2RT72	tr|E2RT80|E2RT80_CANLF ADP ribosylation factor GTPase activating protein 3 OS=Canis lupus familiaris GN=ARFGAP3 PE=4 SV=2;tr|E2RT72|E2RT72_CANLF ADP ribosylation factor GTPase activating protein 3 OS=Canis lupus familiaris GN=ARFGAP3 PE=4 SV=2	2	2	2	2	3.5	57.275	517	3.2099	57365000	1.28047	1.49417	1.12765	0.927558	0.853099	1.00742	0.0322045	1.39963
E2RTA2	E2RTA2	tr|E2RTA2|E2RTA2_CANLF Uncharacterized protein OS=Canis lupus familiaris PE=4 SV=2	1	2	2	2	6.4	35.525	312	4.4807	128060000	1.36127	1.33718	1.23955	0.915081	0.751337	0.879846	0.00172008	1.54658
E2RTB5	E2RTB5	tr|E2RTB5|E2RTB5_CANLF Ubiquinol-cytochrome c reductase complex III subunit VII OS=Canis lupus familiaris GN=UQCRQ PE=4 SV=1	1	4	4	4	46.3	9.7021	82	7.6491	1354900000	1.12465	1.06625	1.18527	1.03153	0.85233	0.907872	0.036721	1.20934
E2RTJ7	E2RTJ7	tr|E2RTJ7|E2RTJ7_CANLF Valyl-tRNA synthetase OS=Canis lupus familiaris GN=VARS PE=3 SV=2	1	25	25	25	24.8	140.34	1264	137.92	7893300000	1.18012	1.19649	1.1928	0.941929	0.983199	0.963699	6.15871e-05	1.23559
F1P6B7;Q6JDN3	F1P6B7	tr|F1P6B7|F1P6B7_CANLF Annexin OS=Canis lupus familiaris GN=ANXA1 PE=3 SV=1	2	18	18	18	59.7	38.626	345	323.31	264000000000	1.2787	1.24665	1.21838	1.0451	1.01189	0.987116	0.000648528	1.22983
J9NWT2;F1P6K2	J9NWT2;F1P6K2	tr|J9NWT2|J9NWT2_CANLF Nicotinamide phosphoribosyltransferase OS=Canis lupus familiaris GN=NAMPT PE=4 SV=1;tr|F1P6K2|F1P6K2_CANLF Nicotinamide phosphoribosyltransferase OS=Canis lupus familiaris GN=NAMPT PE=4 SV=1	2	4	4	4	13.6	53.489	472	24.113	495180000	1.27358	1.16856	1.07994	1.05506	0.879904	0.950267	0.0484914	1.22073
F1P6P2;E2RE61	F1P6P2	tr|F1P6P2|F1P6P2_CANLF Transgelin OS=Canis lupus familiaris GN=TAGLN2 PE=3 SV=2	2	14	14	14	78.9	22.377	199	167.27	44590000000	1.33078	1.36571	1.3193	0.972142	0.84524	0.829065	0.000647189	1.51743
F1P6R7;F1Q3C4;J9P7D5;Q9TRV2;E2R5B9	F1P6R7;F1Q3C4;J9P7D5	tr|F1P6R7|F1P6R7_CANLF Glutathione S-transferase mu 4 OS=Canis lupus familiaris GN=GSTM4 PE=4 SV=2;tr|F1Q3C4|F1Q3C4_CANLF Glutathione S-transferase mu 4 OS=Canis lupus familiaris GN=GSTM4 PE=4 SV=2;tr|J9P7D5|J9P7D5_CANLF Glutathione S-transferase mu 4 OS=C	5	10	10	10	41.7	25.766	218	35.411	4837200000	1.60067	1.5447	1.49411	0.619755	0.599229	0.549692	1.348e-05	2.62314
F1P6V8;J9PBH6	F1P6V8;J9PBH6	tr|F1P6V8|F1P6V8_CANLF Dynein cytoplasmic 1 light intermediate chain 2 OS=Canis lupus familiaris GN=DYNC1LI2 PE=4 SV=2;tr|J9PBH6|J9PBH6_CANLF Dynein cytoplasmic 1 light intermediate chain 2 OS=Canis lupus familiaris GN=DYNC1LI2 PE=4 SV=1	2	5	5	5	15.2	51.215	462	37.494	354050000	1.27686	1.34315	1.2703	0.994397	0.94469	1.04215	0.00115055	1.30493
F1P719	F1P719	tr|F1P719|F1P719_CANLF EH domain containing 4 OS=Canis lupus familiaris GN=EHD4 PE=3 SV=2	1	15	15	13	32.7	61.228	541	74.087	5010000000	1.22479	1.14368	1.13494	1.00255	0.829696	0.94894	0.014708	1.25969
F1P778	F1P778	tr|F1P778|F1P778_CANLF S100 calcium binding protein P OS=Canis lupus familiaris GN=S100P PE=4 SV=2	1	2	2	2	14.9	12.51	114	4.6759	5470700000	1.37956	1.37086	1.30448	0.785429	0.626559	0.648656	0.000269773	1.96778
F1P797	F1P797	tr|F1P797|F1P797_CANLF 5-aminoimidazole-4-carboxamide ribonucleotide formyltransferase/IMP cyclohydrolase OS=Canis lupus familiaris GN=ATIC PE=3 SV=2	1	20	20	20	45.8	64.726	592	221.04	11163000000	1.29697	1.20391	1.2275	0.999393	1.00195	0.911962	0.00261359	1.27977
F1P7C2;J9P755	F1P7C2;J9P755	tr|F1P7C2|F1P7C2_CANLF Alanyl-tRNA synthetase OS=Canis lupus familiaris GN=AARS PE=3 SV=2;tr|J9P755|J9P755_CANLF Alanyl-tRNA synthetase OS=Canis lupus familiaris GN=AARS PE=3 SV=1	2	12	12	12	14.2	106.77	968	53.946	1916500000	1.19378	1.24017	1.04229	0.917433	0.963738	0.805949	0.0256979	1.29367
F1P7L9;F1PLG7	F1P7L9	tr|F1P7L9|F1P7L9_CANLF Myosin IE OS=Canis lupus familiaris GN=MYO1E PE=3 SV=2	2	6	6	6	5.5	127.14	1108	13.359	357670000	1.16912	1.14252	1.07391	0.882289	0.825891	1.0127	0.0235049	1.24428
F1P7W7	F1P7W7	tr|F1P7W7|F1P7W7_CANLF UDP-N-acetylglucosamine pyrophosphorylase 1 OS=Canis lupus familiaris GN=UAP1 PE=4 SV=2	1	4	4	4	10.9	58.804	522	33.179	294220000	1.18582	1.24928	1.33996	0.83773	0.77514	0.759387	0.00076941	1.59134
F1P8U3	F1P8U3	tr|F1P8U3|F1P8U3_CANLF GM2 ganglioside activator OS=Canis lupus familiaris GN=GM2A PE=4 SV=2	1	5	5	5	20.9	21.577	196	10.582	1283900000	1.16912	1.14761	1.17675	0.915412	0.792041	0.813355	0.00115014	1.38586
Q6Q2K4;F1P8U7	Q6Q2K4;F1P8U7	tr|Q6Q2K4|Q6Q2K4_CANLF Heme oxygenase-1 (Fragment) OS=Canis lupus familiaris PE=2 SV=1;tr|F1P8U7|F1P8U7_CANLF Heme oxygenase OS=Canis lupus familiaris GN=HMOX1 PE=3 SV=2	2	10	10	10	53.4	29.193	253	89.699	3183600000	1.21119	1.36552	1.17595	0.799414	0.819881	0.728608	0.00190586	1.5983
F1P926	F1P926	tr|F1P926|F1P926_CANLF Farnesyl diphosphate synthase OS=Canis lupus familiaris GN=FDPS PE=3 SV=2	1	9	9	9	19.7	48.146	421	28.15	5364100000	1.28674	1.3056	1.11977	0.801398	0.725142	0.873381	0.00388838	1.54676
F1PMS4;F1P975	F1PMS4;F1P975	tr|F1PMS4|F1PMS4_CANLF Calpain 2 OS=Canis lupus familiaris GN=CAPN2 PE=3 SV=2;tr|F1P975|F1P975_CANLF Calpain 2 OS=Canis lupus familiaris GN=CAPN2 PE=3 SV=2	2	13	13	13	24.8	72.905	636	66.788	6276800000	1.22523	1.13379	1.18418	0.928996	0.90336	0.945389	0.000936924	1.27556
F1P996	F1P996	tr|F1P996|F1P996_CANLF G protein pathway suppressor 1 OS=Canis lupus familiaris GN=GPS1 PE=4 SV=2	1	7	7	7	22.4	49.231	433	37.789	954000000	1.24776	1.2032	1.18317	0.917943	0.961142	0.846912	0.00139759	1.33314
F1P9B2	F1P9B2	tr|F1P9B2|F1P9B2_CANLF SWAP switching B-cell complex subunit 70 OS=Canis lupus familiaris GN=SWAP70 PE=4 SV=2	1	10	10	10	17.4	68.732	585	28.689	713750000	1.15031	1.17053	1.06738	0.950141	0.885841	0.85143	0.00548178	1.26078
J9NRT0;F1P9C4	J9NRT0;F1P9C4	tr|J9NRT0|J9NRT0_CANLF Alpha-mannosidase OS=Canis lupus familiaris GN=MAN2A1 PE=3 SV=1;tr|F1P9C4|F1P9C4_CANLF Alpha-mannosidase OS=Canis lupus familiaris GN=MAN2A1 PE=3 SV=2	2	10	10	10	10.2	125.38	1096	28.213	814750000	1.17786	1.1549	1.07835	0.906695	0.826528	1.00024	0.0181468	1.24791
F1P9U4;F1Q3Y2;F6X6E5;E2RSE5	F1P9U4	tr|F1P9U4|F1P9U4_CANLF Dihydropyrimidinase like 2 OS=Canis lupus familiaris GN=DPYSL2 PE=4 SV=2	4	18	18	18	33.2	73.59	677	90.118	5968800000	1.14443	1.11804	1.09502	0.927045	0.803758	0.876301	0.00289994	1.28782
F1P9Y5	F1P9Y5	tr|F1P9Y5|F1P9Y5_CANLF Tumor protein D52 OS=Canis lupus familiaris GN=TPD52 PE=4 SV=2	1	3	3	3	15.4	26.95	247	26.554	299490000	1.40377	1.15432	1.48094	0.997823	0.995241	0.774608	0.0263222	1.45936
G4V2B6;F1P9Z8	G4V2B6;F1P9Z8	tr|G4V2B6|G4V2B6_CANLF Procollagen-lysine 1, 2-oxoglutarate 5-dioxygenase 1 OS=Canis lupus familiaris GN=PLOD1 PE=2 SV=1;tr|F1P9Z8|F1P9Z8_CANLF Uncharacterized protein OS=Canis lupus familiaris GN=PLOD1 PE=4 SV=2	2	5	4	4	7.4	83.556	727	12.975	404200000	1.09721	1.20153	1.01147	0.917599	0.829866	0.863693	0.0183784	1.26772
J9NYF2;F1PAI5	J9NYF2;F1PAI5	tr|J9NYF2|J9NYF2_CANLF Ubiquitin recognition factor in ER associated degradation 1 OS=Canis lupus familiaris GN=UFD1 PE=4 SV=1;tr|F1PAI5|F1PAI5_CANLF Ubiquitin recognition factor in ER associated degradation 1 OS=Canis lupus familiaris GN=UFD1 PE=4 SV=2	2	2	2	2	6.8	34.47	307	4.6202	200210000	1.12843	1.14517	1.27041	0.950382	0.929292	0.972296	0.00769344	1.24265
F1PBC8;Q9TT99	F1PBC8;Q9TT99	tr|F1PBC8|F1PBC8_CANLF Copper transport protein ATOX1 OS=Canis lupus familiaris GN=ATOX1 PE=4 SV=2;sp|Q9TT99|ATOX1_CANLF Copper transport protein ATOX1 OS=Canis lupus familiaris GN=ATOX1 PE=3 SV=1	2	4	4	4	85.1	7.3053	67	17.962	1349000000	1.48625	1.4733	1.43082	0.709869	0.72208	0.797444	2.33407e-05	1.96931
F1PBI6	F1PBI6	tr|F1PBI6|F1PBI6_CANLF Thrombospondin 1 OS=Canis lupus familiaris GN=THBS1 PE=4 SV=2	1	5	5	5	4.9	129.61	1170	10.692	254760000	1.30944	0.986142	1.0769	0.927378	0.75828	0.741303	0.0495081	1.38959
F1PBT3;Q28244	F1PBT3	tr|F1PBT3|F1PBT3_CANLF Fructose-bisphosphate aldolase OS=Canis lupus familiaris PE=3 SV=2	2	20	20	3	34.8	74.896	701	283.66	99378000000	1.37195	1.30781	1.23825	0.88073	0.860852	0.807348	0.000504912	1.53712
F1PBX0	F1PBX0	tr|F1PBX0|F1PBX0_CANLF Uncharacterized protein OS=Canis lupus familiaris GN=TXNRD1 PE=3 SV=2	1	8	8	8	14.2	71.556	655	22.391	1478200000	1.2739	1.27493	1.19262	0.869259	0.808913	0.899358	0.000523224	1.45157
F1PBY1	F1PBY1	tr|F1PBY1|F1PBY1_CANLF Uncharacterized protein OS=Canis lupus familiaris GN=MRPL23 PE=4 SV=2	1	2	2	2	15	18.075	153	3.6996	204000000	1.11054	1.05851	1.10891	0.968383	0.924021	0.752739	0.0360363	1.23923
F1PBZ4	F1PBZ4	tr|F1PBZ4|F1PBZ4_CANLF NAD(P)H quinone dehydrogenase 1 OS=Canis lupus familiaris GN=NQO1 PE=4 SV=1	1	9	9	9	29.1	30.794	275	31.242	142000000000	1.84888	1.65963	1.527	0.481628	0.512556	0.511793	0.00023396	3.34368
F1PC59	F1PC59	tr|F1PC59|F1PC59_CANLF Peroxiredoxin 6 OS=Canis lupus familiaris GN=PRDX6 PE=4 SV=1	1	8	8	8	40.7	24.671	221	37.757	8967500000	1.41921	1.22926	1.38887	0.886016	0.901672	0.878086	0.00152519	1.51451
F1PCG4	F1PCG4	tr|F1PCG4|F1PCG4_CANLF Peroxiredoxin 2 OS=Canis lupus familiaris GN=PRDX2 PE=4 SV=2	1	8	7	7	35.4	21.898	198	43.489	3384300000	1.15362	1.31572	1.14527	0.927904	0.998635	0.927966	0.0136562	1.26628
F1PCH3;J9NVW8;E2RAS8;F1PVJ7;Q28226	F1PCH3	tr|F1PCH3|F1PCH3_CANLF Enolase 1 OS=Canis lupus familiaris GN=ENO1 PE=3 SV=2	5	17	17	13	47.6	46.805	429	106.07	83136000000	1.44357	1.43211	1.43189	0.822963	0.725874	0.756417	2.0891e-05	1.86859
F1PCM1	F1PCM1	tr|F1PCM1|F1PCM1_CANLF Biliverdin reductase A OS=Canis lupus familiaris GN=BLVRA PE=3 SV=2	1	5	5	5	17.9	33.71	296	32.679	811080000	1.20582	1.2485	1.11439	0.833917	0.864538	0.939825	0.00357645	1.35267
F1PDI6;J9NS22	F1PDI6;J9NS22	tr|F1PDI6|F1PDI6_CANLF Uncharacterized protein OS=Canis lupus familiaris PE=3 SV=1;tr|J9NS22|J9NS22_CANLF Ubiquitin conjugating enzyme E2 D2 OS=Canis lupus familiaris GN=UBE2D2 PE=3 SV=1	2	1	1	1	8	15.682	138	4.5187	1074800000	1.31432	1.32851	1.25429	0.993127	0.762349	0.691809	0.00673158	1.59243
F1PDP1	F1PDP1	tr|F1PDP1|F1PDP1_CANLF Uncharacterized protein OS=Canis lupus familiaris PE=4 SV=2	1	10	10	10	8.9	130.91	1178	27.557	1202500000	1.05343	1.1217	1.15977	0.961972	0.862952	0.859438	0.00906889	1.24234
F1PE09	F1PE09	tr|F1PE09|F1PE09_CANLF 6-phosphogluconate dehydrogenase, decarboxylating OS=Canis lupus familiaris GN=PGD PE=3 SV=2	1	18	18	18	48	53.095	483	137.1	43183000000	1.4306	1.36164	1.39586	0.767419	0.804295	0.745745	1.85872e-05	1.8072
F1PE28	F1PE28	tr|F1PE28|F1PE28_CANLF Transketolase OS=Canis lupus familiaris GN=TKT PE=4 SV=2	1	20	20	20	47.7	63.154	576	251.76	59559000000	1.24519	1.24064	1.2668	0.895417	0.891105	0.843955	3.4214e-05	1.4266
F1PEZ0	F1PEZ0	tr|F1PEZ0|F1PEZ0_CANLF Serine and arginine rich splicing factor 4 OS=Canis lupus familiaris GN=SRSF4 PE=4 SV=2	1	6	1	1	11.7	54.848	479	2.668	168560000	1.13102	1.18184	1.083	0.836914	0.83507	1.0411	0.0372223	1.25166
F1PF82;J9P8Z5	F1PF82	tr|F1PF82|F1PF82_CANLF Spermine synthase OS=Canis lupus familiaris GN=SMS PE=4 SV=1	2	4	4	4	8.9	41.423	369	6.0613	781270000	1.41513	1.10664	1.24246	0.762341	0.865172	0.917966	0.0154608	1.47879
F1PFB3	F1PFB3	tr|F1PFB3|F1PFB3_CANLF Glutaredoxin 3 OS=Canis lupus familiaris GN=GLRX3 PE=4 SV=2	1	7	7	7	24.3	37.304	333	23.476	2374400000	1.24162	1.28108	1.14325	1.04322	0.932097	1.0024	0.0117965	1.23112
F1PFD0;J9NSX6	F1PFD0	tr|F1PFD0|F1PFD0_CANLF Sorting nexin OS=Canis lupus familiaris GN=SNX6 PE=3 SV=2	2	7	7	6	17.6	47.217	414	14.115	666050000	1.17411	1.35546	1.04039	0.944262	0.798995	0.933857	0.0440694	1.33351
F1PFF2	F1PFF2	tr|F1PFF2|F1PFF2_CANLF Protein S100 OS=Canis lupus familiaris GN=S100A11 PE=3 SV=2	1	3	3	3	27.6	11.067	98	11.339	15674000000	1.45107	1.58701	1.31941	1.04009	0.937882	0.717688	0.0106548	1.61648
F1PFI3	F1PFI3	tr|F1PFI3|F1PFI3_CANLF Phospholipase C beta 3 OS=Canis lupus familiaris GN=PLCB3 PE=4 SV=2	1	3	3	3	20.8	20.418	197	14.495	1477700000	1.35577	1.48776	1.34567	0.780967	0.74916	0.672567	0.000291744	1.90185
J9NRP8;F1PFK0	J9NRP8;F1PFK0	tr|J9NRP8|J9NRP8_CANLF Twinfilin actin binding protein 1 OS=Canis lupus familiaris GN=TWF1 PE=4 SV=1;tr|F1PFK0|F1PFK0_CANLF Twinfilin actin binding protein 1 OS=Canis lupus familiaris GN=TWF1 PE=4 SV=2	2	13	13	10	36.6	40.085	350	71.384	6847400000	1.18065	1.20665	1.17343	0.828466	0.852345	0.873149	3.35474e-05	1.3942
F1PFM5;Q6Q9F8	F1PFM5	tr|F1PFM5|F1PFM5_CANLF Laminin subunit beta 3 OS=Canis lupus familiaris GN=LAMB3 PE=4 SV=2	2	14	14	14	13.7	129.32	1171	37.171	840100000	1.30536	1.3254	1.20941	0.850927	0.75824	0.863756	0.000734741	1.55289
Q867A2;F1PG66	Q867A2;F1PG66	tr|Q867A2|Q867A2_CANLF Laminin-5 gamma 2 OS=Canis lupus familiaris PE=2 SV=1;tr|F1PG66|F1PG66_CANLF Uncharacterized protein OS=Canis lupus familiaris GN=LAMC2 PE=4 SV=2	2	13	13	13	15.2	130.94	1196	81.204	1568100000	1.34932	1.3566	1.14674	0.751942	0.78323	0.74713	0.00168194	1.68806
F1PHR2;J9NV90;O62755;H9KUV7;Q29536;H9KUV5	F1PHR2	tr|F1PHR2|F1PHR2_CANLF Pyruvate kinase OS=Canis lupus familiaris GN=PKM PE=3 SV=2	6	32	32	32	59.8	59.657	547	323.31	113000000000	1.31343	1.26534	1.25677	0.925437	0.957191	0.871156	0.000300133	1.39283
F1PHW5;F1PHX2	F1PHW5;F1PHX2	tr|F1PHW5|F1PHW5_CANLF Prolyl endopeptidase OS=Canis lupus familiaris GN=PREP PE=4 SV=2;tr|F1PHX2|F1PHX2_CANLF Prolyl endopeptidase OS=Canis lupus familiaris GN=PREP PE=4 SV=2	2	17	17	17	28.6	79.552	699	58.28	2467300000	1.24114	1.09123	1.26692	0.931827	0.69605	0.85743	0.0137746	1.44822
F1PHZ3;J9P6E1;J9P9D6	F1PHZ3	tr|F1PHZ3|F1PHZ3_CANLF Phosphatidylinositol transfer protein beta OS=Canis lupus familiaris GN=PITPNB PE=4 SV=2	3	9	9	7	33.2	31.405	271	20.8	1251100000	1.17049	1.29324	1.21701	0.904539	0.891949	0.940276	0.00123194	1.34493
F1PIA2	F1PIA2	tr|F1PIA2|F1PIA2_CANLF Ubiquitin thioesterase OS=Canis lupus familiaris GN=OTUB1 PE=3 SV=2	1	10	10	10	43.5	31.383	271	38.873	3100600000	1.20519	1.14936	1.11994	0.915035	0.894014	0.890084	0.000589897	1.28726
F1PIC7	F1PIC7	tr|F1PIC7|F1PIC7_CANLF Uncharacterized protein OS=Canis lupus familiaris GN=HSPA5 PE=3 SV=2	1	34	34	31	56.9	72.282	654	296.04	266000000000	1.10632	1.0854	1.20786	0.893413	0.878934	0.880111	0.00283146	1.28167
F1PIF2	F1PIF2	tr|F1PIF2|F1PIF2_CANLF Cathepsin Z OS=Canis lupus familiaris GN=CTSZ PE=3 SV=2	1	4	4	4	14.6	29.288	261	10.669	1545800000	1.18227	1.12672	1.24978	0.880254	0.927255	1.04993	0.0194274	1.24545
F1PIG2	F1PIG2	tr|F1PIG2|F1PIG2_CANLF UMP-CMP kinase OS=Canis lupus familiaris GN=CMPK1 PE=3 SV=2	1	7	7	7	33.3	25.812	228	18.35	1254400000	1.40152	1.53911	1.37816	0.76202	0.770448	0.735301	0.000183496	1.90442
F1PIT4	F1PIT4	tr|F1PIT4|F1PIT4_CANLF Tetraspanin OS=Canis lupus familiaris GN=CD63 PE=3 SV=2	1	4	4	4	16.4	25.614	238	10.9	3460900000	1.34421	1.20864	1.28865	0.756342	0.751514	0.847722	0.000595454	1.63081
F1PIX5	F1PIX5	tr|F1PIX5|F1PIX5_CANLF Thioredoxin related transmembrane protein 3 OS=Canis lupus familiaris GN=TMX3 PE=4 SV=2	1	7	7	7	13.5	51.513	453	15.784	592100000	1.23697	1.26176	1.25007	0.889045	0.826205	0.893364	7.65798e-05	1.43708
F1PJI7;Q1HG71;J9P5W6	F1PJI7;Q1HG71;J9P5W6	tr|F1PJI7|F1PJI7_CANLF Mitogen-activated protein kinase kinase 1 OS=Canis lupus familiaris GN=MAP2K1 PE=3 SV=2;tr|Q1HG71|Q1HG71_CANLF Dual specificity mitogen activated protein kinase kinase 1 OS=Canis lupus familiaris PE=2 SV=1;tr|J9P5W6|J9P5W6_CANLF Mito	3	2	1	1	5	42.327	380	3.0394	173410000	1.21791	1.43302	1.0814	0.899728	0.950214	0.984362	0.0466808	1.31684
F1PJV5	F1PJV5	tr|F1PJV5|F1PJV5_CANLF Adenosine kinase OS=Canis lupus familiaris GN=ADK PE=4 SV=2	1	5	5	5	15.2	40.561	362	11.247	851260000	1.31869	1.4466	1.2644	0.864746	0.866307	0.882193	0.000962754	1.54202
F1PK24	F1PK24	tr|F1PK24|F1PK24_CANLF Sphingomyelin phosphodiesterase 4 OS=Canis lupus familiaris GN=SMPD4 PE=4 SV=2	1	3	3	3	3.5	97.944	867	4.7284	108690000	1.07843	1.10635	1.15106	0.94524	0.931747	0.835289	0.00687019	1.22991
F1PK32	F1PK32	tr|F1PK32|F1PK32_CANLF N-acetyl-alpha-glucosaminidase OS=Canis lupus familiaris GN=NAGLU PE=4 SV=2	1	7	7	7	10.8	83.003	747	23.009	858160000	1.15917	1.21714	1.14663	0.95493	0.819388	0.951946	0.00590787	1.29222
F1PK43;J9PA75;F1PYG1;J9NSI8	F1PK43	tr|F1PK43|F1PK43_CANLF Aldo-keto reductase family 1 member A1 OS=Canis lupus familiaris GN=AKR1A1 PE=4 SV=2	4	15	15	15	52	36.633	325	145.62	5240300000	1.30797	1.25744	1.31479	0.797275	0.942172	0.824666	0.0007942	1.51327
F1PKG4	F1PKG4	tr|F1PKG4|F1PKG4_CANLF Golgi phosphoprotein 3 OS=Canis lupus familiaris GN=GOLPH3 PE=4 SV=2	1	2	2	2	12.6	25.588	223	12.613	493490000	1.17753	1.12927	1.32862	0.932196	1.06802	1.01999	0.0465156	1.2037
F1PKI4;F1PBH0;F1PTB9	F1PKI4;F1PBH0;F1PTB9	tr|F1PKI4|F1PKI4_CANLF Chloride intracellular channel protein OS=Canis lupus familiaris GN=CLIC1 PE=3 SV=2;tr|F1PBH0|F1PBH0_CANLF Chloride intracellular channel protein OS=Canis lupus familiaris GN=CLIC1 PE=3 SV=1;tr|F1PTB9|F1PTB9_CANLF Chloride intracellu	3	9	9	9	41.1	27.02	241	48.978	10891000000	1.44578	1.35172	1.34224	0.839938	0.868659	0.796464	0.000154493	1.65255
F1PL63;F1PS82;Q28245;F6XUY6	F1PL63;F1PS82	tr|F1PL63|F1PL63_CANLF Fructose-bisphosphate aldolase OS=Canis lupus familiaris GN=ALDOC PE=3 SV=1;tr|F1PS82|F1PS82_CANLF Fructose-bisphosphate aldolase OS=Canis lupus familiaris GN=ALDOC PE=3 SV=2	4	14	11	11	53	39.341	364	130.5	21877000000	1.34646	1.30666	1.14616	0.842342	0.970282	0.987373	0.0120819	1.35689
F1PL93	F1PL93	tr|F1PL93|F1PL93_CANLF Rho GDP dissociation inhibitor alpha OS=Canis lupus familiaris GN=ARHGDIA PE=4 SV=2	1	9	9	9	61.8	23.393	204	47.903	16990000000	1.43473	1.3581	1.22985	0.817606	0.862529	0.850251	0.00125034	1.58975
J9PA83;F1PLM5;J9PB13;F1PIZ7	J9PA83;F1PLM5	tr|J9PA83|J9PA83_CANLF S-(hydroxymethyl)glutathione dehydrogenase OS=Canis lupus familiaris PE=3 SV=1;tr|F1PLM5|F1PLM5_CANLF S-(hydroxymethyl)glutathione dehydrogenase OS=Canis lupus familiaris PE=3 SV=2	4	5	5	5	13.1	39.664	374	8.447	808900000	1.38653	1.42638	1.11963	0.806304	0.660114	0.787015	0.0063075	1.74513
F1PMB5	F1PMB5	tr|F1PMB5|F1PMB5_CANLF Sorting nexin 2 OS=Canis lupus familiaris GN=SNX2 PE=4 SV=2	1	11	11	10	31.8	46.085	402	40.314	1352400000	1.20118	1.35153	1.2192	0.883504	0.897862	0.799871	0.0021483	1.46128
F1PMG8	F1PMG8	tr|F1PMG8|F1PMG8_CANLF Collagen beta(1-O)galactosyltransferase 1 OS=Canis lupus familiaris GN=COLGALT1 PE=4 SV=2	1	5	5	5	8.5	71.814	623	12.993	589870000	1.08731	1.17108	1.02955	0.838092	0.833206	0.887063	0.00546976	1.28518
F1PP40	F1PP40	tr|F1PP40|F1PP40_CANLF Cysteine rich protein 2 OS=Canis lupus familiaris GN=CRIP2 PE=4 SV=2	1	5	5	5	35.6	22.565	208	90.096	2731400000	1.57227	1.45783	1.44096	0.720592	0.710342	0.774665	7.93787e-05	2.02714
F1PQ80	F1PQ80	tr|F1PQ80|F1PQ80_CANLF SEC23 interacting protein OS=Canis lupus familiaris GN=SEC23IP PE=4 SV=2	1	12	12	12	13.6	112.06	1005	34.097	1100900000	1.20285	1.14541	1.1209	0.984171	0.909993	0.993886	0.00573177	1.20122
F1PQ93	F1PQ93	tr|F1PQ93|F1PQ93_CANLF Stratifin OS=Canis lupus familiaris GN=SFN PE=3 SV=2	1	13	11	11	59.3	27.833	248	57.43	16008000000	1.14217	1.28336	1.15147	0.994216	0.904063	0.88311	0.00959833	1.28605
F1PQA0	F1PQA0	tr|F1PQA0|F1PQA0_CANLF Endonuclease domain containing 1 OS=Canis lupus familiaris GN=ENDOD1 PE=4 SV=2	1	5	5	5	23.9	37.309	335	72.569	1912400000	1.12317	1.20536	1.26603	0.868917	0.99459	0.973712	0.0112892	1.26693
F1PQM1	F1PQM1	tr|F1PQM1|F1PQM1_CANLF Purine nucleoside phosphorylase OS=Canis lupus familiaris GN=PNP PE=3 SV=2	1	11	11	11	48.4	32.302	289	157.64	20820000000	1.45146	1.36812	1.26574	0.88416	0.89397	0.810901	0.00112656	1.57793
F1PQN5;F1Q1C8;J9P0V2;J9NXU5;Q5MAR8	F1PQN5;F1Q1C8;J9P0V2	tr|F1PQN5|F1PQN5_CANLF Cofilin 1 OS=Canis lupus familiaris GN=CFL1 PE=3 SV=2;tr|F1Q1C8|F1Q1C8_CANLF Uncharacterized protein OS=Canis lupus familiaris PE=3 SV=2;tr|J9P0V2|J9P0V2_CANLF Uncharacterized protein OS=Canis lupus familiaris PE=3 SV=1	5	11	11	9	56.6	18.499	166	47.483	55459000000	1.30276	1.34296	1.3091	0.920116	0.848565	0.808201	0.000195171	1.53473
F1PQT1	F1PQT1	tr|F1PQT1|F1PQT1_CANLF Scavenger receptor class B member 1 OS=Canis lupus familiaris GN=SCARB1 PE=3 SV=2	1	3	3	3	5.1	51.662	455	8.5736	663040000	1.27601	1.23509	1.23219	0.86646	0.611181	0.769222	0.00274992	1.666
F1PQW6	F1PQW6	tr|F1PQW6|F1PQW6_CANLF Uncharacterized protein OS=Canis lupus familiaris GN=PDLIM2 PE=4 SV=1	1	2	2	2	5.1	37.857	356	7.1794	127780000	1.90111	1.19428	1.54839	0.482418	0.602487	0.483487	0.00786773	2.96086
F1PR93	F1PR93	tr|F1PR93|F1PR93_CANLF WD repeat domain 1 OS=Canis lupus familiaris GN=WDR1 PE=2 SV=2	1	19	19	19	43.7	66.364	606	125.3	15313000000	1.25675	1.21534	1.24715	0.865805	0.884241	0.869419	1.16862e-05	1.41984
F1PRF8	F1PRF8	tr|F1PRF8|F1PRF8_CANLF Pyridoxal dependent decarboxylase domain containing 1 OS=Canis lupus familiaris GN=PDXDC1 PE=4 SV=2	1	6	6	6	12.3	86.781	788	25.95	416260000	1.07294	1.12169	1.15428	0.899185	0.880017	0.979306	0.00693538	1.21403
P50551;F1PRR4;J9P328;F1PB84	P50551;F1PRR4	sp|P50551|VASP_CANLF Vasodilator-stimulated phosphoprotein OS=Canis lupus familiaris GN=VASP PE=1 SV=3;tr|F1PRR4|F1PRR4_CANLF Vasodilator-stimulated phosphoprotein OS=Canis lupus familiaris GN=VASP PE=3 SV=1	4	9	9	9	29.7	40.413	384	59.256	4821200000	1.13713	1.09696	1.22784	0.963237	0.904795	0.992702	0.0125838	1.21016
F1PS73	F1PS73	tr|F1PS73|F1PS73_CANLF Cystatin B OS=Canis lupus familiaris GN=CSTB PE=4 SV=2	1	1	1	1	15.6	9.0191	77	11.383	4204300000	1.28961	1.31752	1.19613	0.837754	0.826714	1.0117	0.00589627	1.42116
F1PSC3	F1PSC3	tr|F1PSC3|F1PSC3_CANLF Eukaryotic translation initiation factor 4E OS=Canis lupus familiaris GN=EIF4E PE=3 SV=1	1	5	5	5	27.2	25.083	217	23.303	4439200000	1.22097	1.17569	1.29827	0.98718	0.997841	0.981989	0.00254887	1.24533
F1PSK3	F1PSK3	tr|F1PSK3|F1PSK3_CANLF Uncharacterized protein OS=Canis lupus familiaris PE=4 SV=2	1	4	4	4	22.2	16.836	162	49.075	4222500000	1.45163	1.48834	1.33337	0.76598	0.688542	0.745662	0.00018791	1.94226
F1PSK6	F1PSK6	tr|F1PSK6|F1PSK6_CANLF EH domain containing 1 OS=Canis lupus familiaris GN=EHD1 PE=3 SV=2	1	10	10	7	22.1	53.181	471	40.062	4755400000	1.30331	1.31618	1.20251	0.947294	0.82826	0.921631	0.00182134	1.41703
F1PSQ0	F1PSQ0	tr|F1PSQ0|F1PSQ0_CANLF IQ motif containing GTPase activating protein 2 OS=Canis lupus familiaris GN=IQGAP2 PE=4 SV=2	1	16	14	14	13.1	178.2	1548	53.039	1308600000	1.3598	1.43374	1.17013	0.856803	0.803879	0.777348	0.00342333	1.62577
F1PT97;E2QYP4;F1PWL8	F1PT97;E2QYP4	tr|F1PT97|F1PT97_CANLF Actin-related protein 2/3 complex subunit OS=Canis lupus familiaris GN=ARPC1A PE=3 SV=1;tr|E2QYP4|E2QYP4_CANLF Actin-related protein 2/3 complex subunit OS=Canis lupus familiaris GN=ARPC1A PE=3 SV=2	3	9	9	9	23.9	45.046	401	26.902	2163400000	1.08392	1.10941	1.11798	0.955417	0.848155	0.894165	0.00333559	1.22744
J9NUS5;J9P7I4;F1PTG8	J9NUS5;J9P7I4;F1PTG8	tr|J9NUS5|J9NUS5_CANLF Uncharacterized protein OS=Canis lupus familiaris PE=3 SV=1;tr|J9P7I4|J9P7I4_CANLF Trifunctional purine biosynthetic protein adenosine-3 OS=Canis lupus familiaris GN=LOC100856570 PE=3 SV=1;tr|F1PTG8|F1PTG8_CANLF Trifunctional purine	3	21	21	21	23.9	105.9	988	93.777	5583800000	1.21807	1.18326	1.19403	0.938127	0.799087	0.955699	0.00401383	1.33512
J9P423;F1PTZ7;Q28284	J9P423;F1PTZ7;Q28284	tr|J9P423|J9P423_CANLF CD44 antigen OS=Canis lupus familiaris GN=CD44 PE=4 SV=1;tr|F1PTZ7|F1PTZ7_CANLF CD44 antigen OS=Canis lupus familiaris GN=CD44 PE=4 SV=2;sp|Q28284|CD44_CANLF CD44 antigen (Fragment) OS=Canis lupus familiaris GN=CD44 PE=2 SV=1	3	8	8	8	20.1	39.52	363	64.524	6483700000	1.42566	1.22316	1.22737	0.776091	0.891341	0.747017	0.00368072	1.60541
F1PTZ9;Q28259;F1P7C9;L7N0H7;F1PYE8;Q0QET4;F1PFN3;J9PBA3;J9NTU0;E2RNJ4;J9P1C6;E2R8R0;J9P1L8;J9NW97;E2RNN4;J9P540;J9P6C4;Q9TTK3;Q9TV07;J9P443;F1PKK4;J9NWZ6;Q95LE9;Q9N0F5;J9P442;F1PNE9;J9NTL8;J9NZ39;J9P5N8;Q66N59;J9P8C2;E2R196;J9P980;J9P8U7	F1PTZ9;Q28259;F1P7C9;L7N0H7;F1PYE8;Q0QET4;F1PFN3;J9PBA3	tr|F1PTZ9|F1PTZ9_CANLF Glyceraldehyde-3-phosphate dehydrogenase OS=Canis lupus familiaris GN=GAPDH PE=3 SV=2;sp|Q28259|G3P_CANLF Glyceraldehyde-3-phosphate dehydrogenase OS=Canis lupus familiaris GN=GAPDH PE=2 SV=3;tr|F1P7C9|F1P7C9_CANLF Glyceraldehyde-3-p	34	15	15	13	62.1	35.476	330	283.32	204000000000	1.35999	1.18	1.29523	0.916946	1.03097	0.840939	0.0102443	1.3752
F1PUI4	F1PUI4	tr|F1PUI4|F1PUI4_CANLF Serpin family E member 1 OS=Canis lupus familiaris GN=SERPINE1 PE=3 SV=2	1	4	4	4	8.7	45.292	402	5.9326	562390000	1.25044	1.24433	1.36721	0.768778	0.765719	0.613267	0.000927253	1.79814
F1PUL4	F1PUL4	tr|F1PUL4|F1PUL4_CANLF Phosphoglucomutase 1 OS=Canis lupus familiaris GN=PGM1 PE=3 SV=2	1	14	14	14	26.9	64.684	591	33.864	2169200000	1.45122	1.33636	1.31929	0.835952	0.777358	0.828024	0.000254798	1.68222
F1PUM3	F1PUM3	tr|F1PUM3|F1PUM3_CANLF Glutathione S-transferase omega 1 OS=Canis lupus familiaris GN=GSTO1 PE=4 SV=2	1	10	10	10	44	27.37	241	29.67	3140300000	1.33936	1.119	1.07235	0.826535	0.826894	0.783198	0.0120416	1.44902
F1PUR5	F1PUR5	tr|F1PUR5|F1PUR5_CANLF Anterior gradient 2, protein disulphide isomerase family member OS=Canis lupus familiaris GN=AGR2 PE=4 SV=2	1	1	1	1	6.3	19.868	175	3.6528	276930000	1.28171	1.53765	1.30769	0.860191	0.747406	0.886485	0.00406045	1.65474
F1PUX9	F1PUX9	tr|F1PUX9|F1PUX9_CANLF Histone acetyltransferase type B catalytic subunit OS=Canis lupus familiaris GN=HAT1 PE=3 SV=2	1	6	6	6	18.6	48.786	413	18.514	1183500000	1.28288	1.21845	1.06476	0.920566	1.033	0.92463	0.0369226	1.239
F1PV95	F1PV95	tr|F1PV95|F1PV95_CANLF Ankyrin repeat domain 52 OS=Canis lupus familiaris GN=ANKRD52 PE=4 SV=2	1	2	2	2	2.2	108.29	1015	4.5439	42555000	1.34696	1.36525	1.57616	0.991987	1.03315	0.929925	0.00500636	1.45119
F1PVE5	F1PVE5	tr|F1PVE5|F1PVE5_CANLF Vacuolar protein sorting 4 homolog B OS=Canis lupus familiaris GN=VPS4B PE=3 SV=2	1	8	8	6	23.6	49.206	444	21.373	462290000	1.11058	1.09703	1.18074	0.921735	0.838199	0.94444	0.00531645	1.25292
F1PVW0;E2RA64;J9P1U5	F1PVW0;E2RA64	tr|F1PVW0|F1PVW0_CANLF L-lactate dehydrogenase OS=Canis lupus familiaris GN=LOC476882 PE=3 SV=2;tr|E2RA64|E2RA64_CANLF L-lactate dehydrogenase OS=Canis lupus familiaris GN=LOC476882 PE=3 SV=2	3	14	14	12	38.8	39.798	361	88.248	95914000000	1.33659	1.35996	1.2974	1.00894	0.934577	0.927509	0.000298242	1.39112
F1PWB7	F1PWB7	tr|F1PWB7|F1PWB7_CANLF Non-specific cytotoxic cell receptor protein 1 homolog (zebrafish) OS=Canis lupus familiaris GN=NCCRP1 PE=4 SV=2	1	3	3	3	19	29.139	258	66.77	375020000	1.73701	1.37571	1.20458	0.652887	0.726053	0.710727	0.0094152	2.06603
F1PWC7	F1PWC7	tr|F1PWC7|F1PWC7_CANLF Uncharacterized protein OS=Canis lupus familiaris GN=LOC609365 PE=4 SV=2	1	5	5	5	14.2	43.419	395	25.498	1227900000	1.10849	1.12296	1.17503	0.888342	0.900867	1.03785	0.0205415	1.20496
F1PWQ0;O97555;J9P1V4	F1PWQ0;O97555;J9P1V4	tr|F1PWQ0|F1PWQ0_CANLF Rab GDP dissociation inhibitor OS=Canis lupus familiaris GN=PLXNA3 PE=3 SV=2;sp|O97555|GDIA_CANLF Rab GDP dissociation inhibitor alpha OS=Canis lupus familiaris GN=GDI1 PE=2 SV=1;tr|J9P1V4|J9P1V4_CANLF Rab GDP dissociation inhibitor	3	12	7	7	33.3	50.506	447	21.164	955700000	1.30363	1.40914	1.24628	0.841142	0.839421	0.850213	0.000571204	1.56436
F1PWR0	F1PWR0	tr|F1PWR0|F1PWR0_CANLF Acyl-CoA thioesterase 7 OS=Canis lupus familiaris GN=ACOT7 PE=4 SV=2	1	5	5	1	15.5	47.399	432	54.274	1446100000	1.27467	1.36236	1.2639	0.895538	0.760909	0.809225	0.000678271	1.58209
F1PXG4;P50994	F1PXG4;P50994	tr|F1PXG4|F1PXG4_CANLF Annexin OS=Canis lupus familiaris GN=ANXA4 PE=3 SV=2;sp|P50994|ANXA4_CANLF Annexin A4 OS=Canis lupus familiaris GN=ANXA4 PE=1 SV=2	2	13	13	13	47.3	35.938	319	156.31	7576900000	1.26744	1.31345	1.23251	0.845287	0.752452	0.859264	0.000380789	1.55206
F1PXI2	F1PXI2	tr|F1PXI2|F1PXI2_CANLF Uncharacterized protein OS=Canis lupus familiaris GN=LOC608057 PE=4 SV=2	1	6	6	6	34	27.482	253	32.16	5559500000	1.77247	1.50148	1.39729	0.580689	0.713327	0.57241	0.00150016	2.50277
F1PY21;F1PY20	F1PY21	tr|F1PY21|F1PY21_CANLF Uncharacterized protein OS=Canis lupus familiaris GN=GSR PE=3 SV=2	2	9	9	9	20.9	56.135	521	39.12	2084000000	1.15524	1.0989	1.09389	0.94987	0.869328	0.796636	0.00728342	1.27991
F1PY28	F1PY28	tr|F1PY28|F1PY28_CANLF Branched-chain-amino-acid aminotransferase OS=Canis lupus familiaris GN=BCAT1 PE=3 SV=2	1	10	10	10	27.5	42.88	385	30.64	7272600000	1.52916	1.3823	1.36865	0.802541	0.820383	0.824669	0.000296521	1.7487
F1PY49;J9P432;F1PGJ3	F1PY49	tr|F1PY49|F1PY49_CANLF Glutamine--fructose-6-phosphate transaminase 1 OS=Canis lupus familiaris GN=GFPT1 PE=4 SV=2	3	15	15	15	25.4	79.941	710	62.926	2261900000	1.29689	1.24699	1.23585	0.953769	0.930403	0.888316	0.000234003	1.3633
F1PYE3;A0A097HUC9;P42929	F1PYE3;A0A097HUC9;P42929	tr|F1PYE3|F1PYE3_CANLF Heat shock protein 27 kDa beta-1 OS=Canis lupus familiaris GN=HSPB1 PE=3 SV=1;tr|A0A097HUC9|A0A097HUC9_CANLF Heat shock protein 27 (Fragment) OS=Canis lupus familiaris GN=HSP27 PE=2 SV=1;sp|P42929|HSPB1_CANLF Heat shock protein beta-	3	11	11	11	70.9	22.765	206	203.42	52954000000	1.73365	1.57011	1.53585	0.560841	0.620375	0.611977	9.10868e-05	2.69888
F1PYQ2;F1PWN3	F1PYQ2;F1PWN3	tr|F1PYQ2|F1PYQ2_CANLF Peptidylprolyl isomerase OS=Canis lupus familiaris PE=4 SV=2;tr|F1PWN3|F1PWN3_CANLF Peptidylprolyl isomerase OS=Canis lupus familiaris PE=4 SV=2	2	2	2	2	21.4	15.242	140	38.094	843530000	1.21038	1.31295	1.08116	0.986876	1.01301	0.950638	0.0348931	1.22165
F1PYU3	F1PYU3	tr|F1PYU3|F1PYU3_CANLF Fascin OS=Canis lupus familiaris GN=FSCN1 PE=3 SV=2	1	14	14	14	30.6	54.646	493	39.124	4129700000	1.43563	1.43605	1.23459	0.727203	0.624595	0.708948	0.000777103	1.99262
J9P3Q3;F1PYX5;J9P4S8;J9NX45;J9PA16;J9P6S1;J9P3I6;J9P6L9	J9P3Q3;F1PYX5;J9P4S8;J9NX45;J9PA16	tr|J9P3Q3|J9P3Q3_CANLF Uncharacterized protein OS=Canis lupus familiaris GN=LOC610206 PE=3 SV=1;tr|F1PYX5|F1PYX5_CANLF Uncharacterized protein OS=Canis lupus familiaris PE=3 SV=2;tr|J9P4S8|J9P4S8_CANLF Uncharacterized protein OS=Canis lupus familiaris GN=U	8	5	5	5	34.2	17.125	152	14.42	4492100000	1.31957	1.33062	1.3816	0.890567	0.90262	0.818444	0.000129072	1.54378
F1PZA1;Q0QEQ8	F1PZA1;Q0QEQ8	tr|F1PZA1|F1PZA1_CANLF Isocitrate dehydrogenase [NADP] OS=Canis lupus familiaris GN=IDH1 PE=3 SV=1;tr|Q0QEQ8|Q0QEQ8_CANLF Isocitrate dehydrogenase 1 (Fragment) OS=Canis lupus familiaris GN=IDH1 PE=2 SV=1	2	9	8	8	23.7	46.807	414	16.953	835530000	1.48497	1.22899	1.29188	0.892337	0.872285	0.950078	0.00589176	1.47561
F1PZE3	F1PZE3	tr|F1PZE3|F1PZE3_CANLF Eukaryotic translation initiation factor 4E binding protein 1 OS=Canis lupus familiaris GN=EIF4EBP1 PE=4 SV=2	1	2	2	2	48.3	12.542	118	54.408	891650000	1.48212	1.40294	1.31698	0.849305	0.890583	0.737021	0.000965374	1.69649
F1Q0I8;J9P1Q9;Q9TQQ6;J9P944	F1Q0I8	tr|F1Q0I8|F1Q0I8_CANLF Uncharacterized protein OS=Canis lupus familiaris GN=LOC476006 PE=4 SV=2	4	6	6	3	38.1	23.71	210	25.022	2423300000	1.26735	1.25313	1.19111	0.993996	0.847473	0.815406	0.00416918	1.39698
F1Q0K5	F1Q0K5	tr|F1Q0K5|F1Q0K5_CANLF Triokinase and FMN cyclase OS=Canis lupus familiaris GN=TKFC PE=4 SV=2	1	3	3	3	8.1	59.456	578	15.171	288400000	1.18527	1.46526	1.20038	0.773041	0.854914	0.789147	0.00714016	1.59319
F6XJG2;F1Q146	F6XJG2;F1Q146	tr|F6XJG2|F6XJG2_CANLF Zinc finger protein 185 with LIM domain OS=Canis lupus familiaris GN=ZNF185 PE=4 SV=1;tr|F1Q146|F1Q146_CANLF Zinc finger protein 185 with LIM domain OS=Canis lupus familiaris GN=ZNF185 PE=4 SV=2	2	22	22	22	43.8	70.701	655	157.29	3193300000	1.13145	1.12436	0.964955	0.890115	0.836081	0.85993	0.0201164	1.2454
F1Q1H3	F1Q1H3	tr|F1Q1H3|F1Q1H3_CANLF Programmed cell death 6 OS=Canis lupus familiaris GN=PDCD6 PE=4 SV=2	1	3	3	3	14.3	21.713	189	7.4	587120000	1.27994	1.16541	1.171	1.01769	0.84685	0.960286	0.0134789	1.2802
K0J5K2;F1Q1M8;K0J6C5	K0J5K2;F1Q1M8;K0J6C5	tr|K0J5K2|K0J5K2_CANLF Beta-N-acetylhexosaminidase beta subunit, exons 2-14 (Fragment) OS=Canis lupus familiaris GN=HEXB PE=4 SV=1;tr|F1Q1M8|F1Q1M8_CANLF Hexosaminidase subunit beta OS=Canis lupus familiaris GN=HEXB PE=4 SV=2;tr|K0J6C5|K0J6C5_CANLF Beta-N-	3	12	12	12	31.1	51.764	453	51.406	2622100000	1.19137	1.07948	1.21758	0.882394	0.952073	0.766277	0.0126218	1.34132
F1Q2F6;B9A1S7	F1Q2F6	tr|F1Q2F6|F1Q2F6_CANLF Fatty acid synthase OS=Canis lupus familiaris GN=FASN PE=4 SV=2	2	74	74	74	38	273.45	2518	323.31	55421000000	1.24911	1.17538	1.19996	0.938904	0.95794	0.954938	0.000330493	1.27094
J9P6J1;F1Q3G6;Q66US6	J9P6J1;F1Q3G6;Q66US6	tr|J9P6J1|J9P6J1_CANLF Mucin 1, cell surface associated OS=Canis lupus familiaris GN=MUC1 PE=4 SV=1;tr|F1Q3G6|F1Q3G6_CANLF Mucin 1, cell surface associated OS=Canis lupus familiaris GN=MUC1 PE=4 SV=2;tr|Q66US6|Q66US6_CANLF Endometrial mucin-1 (Fragment) OS	3	4	4	4	15.1	30.934	284	22.811	1504700000	1.0719	1.06036	1.19556	0.89978	0.858191	0.95241	0.0158068	1.22781
F1Q3S9	F1Q3S9	tr|F1Q3S9|F1Q3S9_CANLF ATP-dependent 6-phosphofructokinase OS=Canis lupus familiaris GN=PFKL PE=3 SV=2	1	13	13	11	19.5	85.293	780	51.863	2382100000	1.15263	1.12548	1.18393	0.930511	0.956898	0.806769	0.00653459	1.28501
F1Q3Y0	F1Q3Y0	tr|F1Q3Y0|F1Q3Y0_CANLF Profilin OS=Canis lupus familiaris GN=PFN1 PE=3 SV=1	1	7	7	7	74.5	10.625	98	31.998	17982000000	1.2289	1.27448	1.10034	0.833827	0.858763	0.872318	0.00290387	1.40501
F1Q462	F1Q462	tr|F1Q462|F1Q462_CANLF Superoxide dismutase [Cu-Zn] OS=Canis lupus familiaris GN=SOD1 PE=3 SV=2	1	3	1	1	19.3	15.562	150	2.5967	1232300000	1.70345	1.57649	1.36808	0.740058	0.590667	0.622958	0.00113344	2.37911
F1Q466	F1Q466	tr|F1Q466|F1Q466_CANLF Acetyl-CoA acetyltransferase 2 OS=Canis lupus familiaris GN=ACAT2 PE=3 SV=1	1	6	6	6	23.9	41.961	406	61.144	2466500000	1.19226	1.29756	1.28593	0.891708	0.924353	0.848808	0.000747455	1.41686
F1Q4F5	F1Q4F5	tr|F1Q4F5|F1Q4F5_CANLF Adenylosuccinate synthetase isozyme 2 OS=Canis lupus familiaris GN=ADSS PE=3 SV=2	1	13	13	13	37.5	50.023	456	63.247	3231800000	1.24143	1.20178	1.23791	0.945355	0.916389	0.912577	5.05059e-05	1.32685
F1Q4K1	F1Q4K1	tr|F1Q4K1|F1Q4K1_CANLF Programmed cell death 5 OS=Canis lupus familiaris GN=PDCD5 PE=4 SV=2	1	1	1	1	10.8	12.548	111	3.6228	531130000	1.1821	1.16561	1.42322	1.0538	0.749577	0.874641	0.0398572	1.40811
F2Z4P9;P24409;J9NUV0	F2Z4P9;P24409;J9NUV0	tr|F2Z4P9|F2Z4P9_CANLF Ras-related protein Rab-10 OS=Canis lupus familiaris GN=RAB10 PE=4 SV=1;sp|P24409|RAB10_CANLF Ras-related protein Rab-10 OS=Canis lupus familiaris GN=RAB10 PE=1 SV=1;tr|J9NUV0|J9NUV0_CANLF Ras-related protein Rab-10 OS=Canis lupus fa	3	8	7	6	37.5	22.541	200	26.048	3084600000	0.998224	1.07649	1.01408	0.847197	0.803755	0.870341	0.00358389	1.22508
F6UKT8	F6UKT8	tr|F6UKT8|F6UKT8_CANLF Pirin OS=Canis lupus familiaris GN=PIR PE=3 SV=1	1	9	9	9	39.3	32.149	290	73.664	7094500000	1.59844	1.46845	1.54885	0.64162	0.724448	0.625266	5.67006e-05	2.31791
F6UT62	F6UT62	tr|F6UT62|F6UT62_CANLF Sorting nexin 3 OS=Canis lupus familiaris GN=SNX3 PE=4 SV=1	1	3	3	3	21	18.762	162	8.6678	1018300000	1.18207	1.46178	1.54359	0.830659	0.782126	0.859796	0.00691356	1.69355
J9P1Q5;F6V2R0	J9P1Q5;F6V2R0	tr|J9P1Q5|J9P1Q5_CANLF Sec23 homolog A, coat complex II component OS=Canis lupus familiaris GN=SEC23A PE=4 SV=1;tr|F6V2R0|F6V2R0_CANLF Sec23 homolog A, coat complex II component OS=Canis lupus familiaris GN=SEC23A PE=4 SV=1	2	9	9	9	16.6	86.184	765	44.121	1915100000	1.18125	1.12439	1.16656	0.999554	0.854659	0.957458	0.00892523	1.23492
F6V5M4	F6V5M4	tr|F6V5M4|F6V5M4_CANLF Nuclear distribution C, dynein complex regulator OS=Canis lupus familiaris GN=NUDC PE=4 SV=1	1	14	14	14	44.9	38.369	332	48.982	5864700000	1.16455	1.2333	1.11366	1.01263	0.919261	0.869216	0.0121878	1.25362
F6X5M3	F6X5M3	tr|F6X5M3|F6X5M3_CANLF Clathrin light chain OS=Canis lupus familiaris GN=CLTB PE=3 SV=1	1	3	3	3	12.2	25.16	229	8.3919	857570000	1.09946	1.32617	1.2085	0.970757	0.989695	0.904424	0.0219014	1.26851
F6X7Y8;J9P4K6	F6X7Y8;J9P4K6	tr|F6X7Y8|F6X7Y8_CANLF Peptidyl arginine deiminase 1 OS=Canis lupus familiaris GN=PADI1 PE=4 SV=1;tr|J9P4K6|J9P4K6_CANLF Peptidyl arginine deiminase 1 OS=Canis lupus familiaris GN=PADI1 PE=4 SV=1	2	8	8	8	10.9	74.011	663	12.39	716980000	1.44727	1.37296	1.17756	0.763137	0.473172	0.774119	0.00647976	1.98852
F6XBP8	F6XBP8	tr|F6XBP8|F6XBP8_CANLF Collagen alpha-1(XVII) chain OS=Canis lupus familiaris GN=COL17A1 PE=4 SV=1	1	15	15	0	11.8	148.25	1468	44.862	1805900000	1.34493	1.19229	1.11771	0.785844	0.771227	0.853427	0.00439112	1.51625
F6XGA3	F6XGA3	tr|F6XGA3|F6XGA3_CANLF Jupiter microtubule associated homolog 2 OS=Canis lupus familiaris GN=JPT2 PE=4 SV=1	1	2	2	2	11.2	23.936	233	5.3337	387780000	1.35814	1.41331	1.16447	0.739523	0.739377	0.893001	0.00462812	1.6594
F6XH46;Q6PXE0	F6XH46;Q6PXE0	tr|F6XH46|F6XH46_CANLF Glutathione peroxidase OS=Canis lupus familiaris GN=GPX1 PE=3 SV=1;tr|Q6PXE0|Q6PXE0_CANLF Glutathione peroxidase (Fragment) OS=Canis lupus familiaris PE=2 SV=1	2	5	5	5	37	17.288	154	11.877	1196400000	1.58346	1.48894	1.23736	0.675214	0.704586	0.75055	0.0023382	2.02303
F6XXQ6;F6XYC2;F6V909	F6XXQ6;F6XYC2	tr|F6XXQ6|F6XXQ6_CANLF Active BCR-related OS=Canis lupus familiaris GN=ABR PE=4 SV=1;tr|F6XYC2|F6XYC2_CANLF Active BCR-related OS=Canis lupus familiaris GN=ABR PE=4 SV=1	3	4	4	4	5.1	93.77	822	9.7655	316780000	1.05292	1.12058	1.23566	0.912953	0.946764	0.937294	0.0197936	1.21886
F6Y037;J9P992	F6Y037;J9P992	tr|F6Y037|F6Y037_CANLF Myosin XVIIIA OS=Canis lupus familiaris GN=MYO18A PE=3 SV=1;tr|J9P992|J9P992_CANLF Myosin XVIIIA OS=Canis lupus familiaris GN=MYO18A PE=3 SV=1	2	20	20	20	12.6	233.08	2054	61.44	955820000	1.16882	1.19705	1.10938	0.944273	0.788606	1.03292	0.0357274	1.25651
F6Y290	F6Y290	tr|F6Y290|F6Y290_CANLF Leukotriene A(4) hydrolase OS=Canis lupus familiaris GN=LTA4H PE=3 SV=1	1	17	17	17	30	78.711	701	54.445	2473400000	1.27292	1.24654	1.26225	0.948692	0.847491	0.855782	0.00034979	1.426
F6Y3P9	F6Y3P9	tr|F6Y3P9|F6Y3P9_CANLF Gelsolin OS=Canis lupus familiaris GN=GSN PE=4 SV=1	1	18	18	18	30.9	85.243	783	105.39	12726000000	1.3799	1.27792	1.27543	0.766916	0.824577	0.772225	0.000179072	1.66401
F6Y4T4	F6Y4T4	tr|F6Y4T4|F6Y4T4_CANLF 1-acylglycerol-3-phosphate O-acyltransferase 4 OS=Canis lupus familiaris GN=AGPAT4 PE=4 SV=1	1	7	7	7	19	44.021	378	21.29	1142300000	1.20205	1.17365	1.10848	0.902019	0.933775	1.04253	0.0164278	1.21049
H9GW54	H9GW54	tr|H9GW54|H9GW54_CANLF Uncharacterized protein OS=Canis lupus familiaris GN=DBNL PE=4 SV=2	1	9	9	9	28.6	47.758	426	57.128	1691700000	1.3137	1.30608	1.19797	0.964037	0.930142	0.925205	0.00106746	1.35411
J9NTY9;H9GW57;J9JHF3;J9P910;H9GW58	J9NTY9;H9GW57;J9JHF3;J9P910;H9GW58	tr|J9NTY9|J9NTY9_CANLF Uncharacterized protein OS=Canis lupus familiaris GN=LOC475497 PE=3 SV=1;tr|H9GW57|H9GW57_CANLF Uncharacterized protein OS=Canis lupus familiaris GN=LOC475497 PE=3 SV=2;tr|J9JHF3|J9JHF3_CANLF Uncharacterized protein OS=Canis lupus fa	5	4	4	4	24.7	20.646	182	13.471	293610000	1.22899	1.08695	1.19149	0.822559	1.02538	0.810507	0.0256646	1.31935
H9GW87	H9GW87	tr|H9GW87|H9GW87_CANLF Transaldolase OS=Canis lupus familiaris GN=LOC475937 PE=3 SV=1	1	13	13	13	38.6	37.53	337	38.941	10315000000	1.21734	1.20967	1.19879	1.07186	0.938119	1.00184	0.00630348	1.20386
H9GWB6;J9NZ14	H9GWB6;J9NZ14	tr|H9GWB6|H9GWB6_CANLF Uncharacterized protein OS=Canis lupus familiaris GN=PPP1R7 PE=4 SV=2;tr|J9NZ14|J9NZ14_CANLF Uncharacterized protein OS=Canis lupus familiaris PE=4 SV=1	2	7	7	7	18.2	46.62	407	15.591	1004000000	1.21197	1.31267	1.31819	0.876572	0.842541	0.824663	0.000329051	1.51068
H9GWE2	H9GWE2	tr|H9GWE2|H9GWE2_CANLF Uncharacterized protein OS=Canis lupus familiaris PE=4 SV=2	1	11	11	11	40.3	33.538	310	58.386	23709000000	1.33166	1.26685	1.20004	0.875005	0.783154	0.758402	0.000895141	1.57188
J9NRH5;E2QVP6	J9NRH5;E2QVP6	tr|J9NRH5|J9NRH5_CANLF Tyrosine 3-monooxygenase/tryptophan 5-monooxygenase activation protein gamma OS=Canis lupus familiaris GN=YWHAG PE=3 SV=1;tr|E2QVP6|E2QVP6_CANLF Tyrosine 3-monooxygenase/tryptophan 5-monooxygenase activation protein gamma OS=Canis lu	2	9	6	6	45.1	25.553	224	38.315	8643800000	1.19281	1.24662	1.00365	0.954918	0.932322	0.76709	0.0497305	1.29716
J9NRN6	J9NRN6	tr|J9NRN6|J9NRN6_CANLF Peptidyl-prolyl cis-trans isomerase OS=Canis lupus familiaris PE=3 SV=1	1	3	2	2	15.5	12.922	116	3.6616	1055800000	1.21084	1.26339	1.27461	0.693184	0.582063	0.962558	0.0117566	1.67523
J9NS50	J9NS50	tr|J9NS50|J9NS50_CANLF Uncharacterized protein OS=Canis lupus familiaris PE=4 SV=1	1	2	2	2	16.8	11.068	101	3.49	575390000	1.36081	1.30304	1.45979	0.900511	0.611249	0.678637	0.00283643	1.8826
J9NSM8;F1P8W3	J9NSM8;F1P8W3	tr|J9NSM8|J9NSM8_CANLF Osteoclast stimulating factor 1 OS=Canis lupus familiaris GN=OSTF1 PE=4 SV=1;tr|F1P8W3|F1P8W3_CANLF Osteoclast stimulating factor 1 OS=Canis lupus familiaris GN=OSTF1 PE=4 SV=2	2	6	6	6	40.1	23.049	207	47.59	1721600000	1.38961	1.38913	1.13991	0.779484	0.776352	0.821199	0.00367945	1.64854
J9NT20;F1PI87	J9NT20;F1PI87	tr|J9NT20|J9NT20_CANLF Obg-like ATPase 1 OS=Canis lupus familiaris GN=OLA1 PE=3 SV=1;tr|F1PI87|F1PI87_CANLF Obg-like ATPase 1 OS=Canis lupus familiaris GN=OLA1 PE=3 SV=2	2	10	10	10	28.1	44.628	395	24.991	1563000000	1.28504	1.11119	1.1188	0.942801	0.895162	0.828859	0.0125741	1.31806
J9NZQ3;J9NTK7	J9NZQ3;J9NTK7	tr|J9NZQ3|J9NZQ3_CANLF V-type proton ATPase subunit G OS=Canis lupus familiaris PE=3 SV=1;tr|J9NTK7|J9NTK7_CANLF V-type proton ATPase subunit G OS=Canis lupus familiaris PE=3 SV=1	2	2	2	2	31.1	10.586	90	29.88	1115000000	1.18638	1.251	1.08667	0.881334	0.876782	0.788614	0.00449729	1.38376
J9NTM8;F1Q0C4	J9NTM8;F1Q0C4	tr|J9NTM8|J9NTM8_CANLF Uncharacterized protein OS=Canis lupus familiaris GN=AKAP2 PE=4 SV=1;tr|F1Q0C4|F1Q0C4_CANLF Uncharacterized protein OS=Canis lupus familiaris GN=AKAP2 PE=4 SV=2	2	5	5	5	5.5	126.55	1169	12.262	235640000	1.33374	1.27834	1.19767	1.00861	0.792589	1.01806	0.0168008	1.35133
J9NUK4	J9NUK4	tr|J9NUK4|J9NUK4_CANLF cAMP regulated phosphoprotein 19 OS=Canis lupus familiaris GN=ARPP19 PE=3 SV=1	1	4	4	3	45.5	12.323	112	13.856	340430000	1.4618	1.43499	1.21208	0.683464	0.84109	0.701502	0.00256608	1.84581
J9NV86	J9NV86	tr|J9NV86|J9NV86_CANLF Glia maturation factor beta OS=Canis lupus familiaris GN=GMFB PE=4 SV=1	1	3	3	3	21.1	16.713	142	33.652	1266400000	1.24986	1.46275	1.39588	0.968312	0.810244	0.879387	0.00340214	1.54574
J9NVU0;E2RL88	J9NVU0;E2RL88	tr|J9NVU0|J9NVU0_CANLF Integrin subunit alpha 6 OS=Canis lupus familiaris GN=ITGA6 PE=3 SV=1;tr|E2RL88|E2RL88_CANLF Integrin subunit alpha 6 OS=Canis lupus familiaris GN=ITGA6 PE=3 SV=2	2	22	22	22	22.3	119.5	1073	137.47	4253700000	1.17005	1.23131	1.25124	0.818757	0.879687	0.78679	0.000442986	1.46972
J9NW96	J9NW96	tr|J9NW96|J9NW96_CANLF N-acetylglucosamine kinase OS=Canis lupus familiaris GN=NAGK PE=4 SV=1	1	1	1	1	5.6	29.879	269	4.203	71185000	1.1625	1.12612	1.01726	0.791408	0.795576	0.773111	0.0020386	1.40074
J9NWJ5;P99505	J9NWJ5	tr|J9NWJ5|J9NWJ5_CANLF Thioredoxin OS=Canis lupus familiaris GN=TXN PE=3 SV=1	2	5	5	5	41.6	11.387	101	13.83	20220000000	1.27467	1.21212	1.26619	0.956487	0.671489	0.741807	0.0063245	1.58368
J9NWL7;F1Q2K8	J9NWL7;F1Q2K8	tr|J9NWL7|J9NWL7_CANLF LPS responsive beige-like anchor protein OS=Canis lupus familiaris GN=LRBA PE=4 SV=1;tr|F1Q2K8|F1Q2K8_CANLF LPS responsive beige-like anchor protein OS=Canis lupus familiaris GN=LRBA PE=4 SV=2	2	11	11	11	5.4	317.96	2854	46.999	588110000	1.11936	1.23263	0.913564	0.850008	0.516185	0.740775	0.0464518	1.54989
J9NX46	J9NX46	tr|J9NX46|J9NX46_CANLF GLI pathogenesis related 2 OS=Canis lupus familiaris GN=GLIPR2 PE=3 SV=1	1	2	2	2	17	17.15	153	5.6817	281350000	1.22403	1.39972	1.24566	0.951754	0.748632	1.08325	0.0318881	1.39005
J9NXR3	J9NXR3	tr|J9NXR3|J9NXR3_CANLF Uncharacterized protein OS=Canis lupus familiaris PE=4 SV=1	1	12	12	12	18.2	89.13	818	52.438	5292800000	1.18691	1.14377	1.21261	0.814746	0.887847	0.788946	0.000608556	1.42213
J9NXY7	J9NXY7	tr|J9NXY7|J9NXY7_CANLF PDZ and LIM domain 1 OS=Canis lupus familiaris GN=PDLIM1 PE=4 SV=1	1	6	6	6	26.4	29.8	269	26.951	1455800000	1.02542	1.17934	1.23229	0.864706	0.777145	0.927375	0.0188489	1.33778
J9NYN2	J9NYN2	tr|J9NYN2|J9NYN2_CANLF Cysteine and glycine rich protein 1 OS=Canis lupus familiaris GN=CSRP1 PE=4 SV=1	1	6	6	6	42.5	20.632	193	34.47	1048700000	1.22379	1.20178	0.975269	0.790437	0.883235	0.729081	0.0218058	1.41539
J9NZV9;H9GWI3	J9NZV9;H9GWI3	tr|J9NZV9|J9NZV9_CANLF Uncharacterized protein OS=Canis lupus familiaris PE=4 SV=1;tr|H9GWI3|H9GWI3_CANLF Uncharacterized protein OS=Canis lupus familiaris PE=4 SV=2	2	16	16	16	29.9	173.63	1648	139.76	14138000000	1.10257	1.18927	1.15816	1.02838	0.856605	0.945383	0.0206923	1.21892
J9P092;J9NS37	J9P092	tr|J9P092|J9P092_CANLF Uncharacterized protein OS=Canis lupus familiaris PE=3 SV=1	2	5	5	5	27.7	21.154	184	11.942	811560000	1.25767	1.34956	1.234	0.770697	0.768336	0.814927	0.000206822	1.63182
J9P0X7	J9P0X7	tr|J9P0X7|J9P0X7_CANLF Coactosin like F-actin binding protein 1 OS=Canis lupus familiaris GN=COTL1 PE=4 SV=1	1	3	3	3	22.8	13.758	123	4.7233	737680000	1.43428	1.37211	0.979027	0.58666	0.452036	0.441994	0.00687197	2.55652
J9P2P6	J9P2P6	tr|J9P2P6|J9P2P6_CANLF Spermidine synthase OS=Canis lupus familiaris GN=SRM PE=3 SV=1	1	2	2	2	11.7	27.632	247	6.0346	584710000	1.22001	1.252	1.23732	1.04029	0.917023	0.990869	0.00236575	1.25817
J9P2T7;F1P7L2	J9P2T7;F1P7L2	tr|J9P2T7|J9P2T7_CANLF Uncharacterized protein OS=Canis lupus familiaris PE=4 SV=1;tr|F1P7L2|F1P7L2_CANLF Uncharacterized protein OS=Canis lupus familiaris GN=PSMD5 PE=4 SV=1	2	9	9	9	20.6	51.043	461	47.173	2522100000	1.17157	1.3085	1.08517	0.982297	0.91217	0.877069	0.0213061	1.28638
J9P3I3	J9P3I3	tr|J9P3I3|J9P3I3_CANLF Transmembrane protein 189 OS=Canis lupus familiaris GN=TMEM189 PE=4 SV=1	1	1	1	1	3.3	31.196	271	2.9914	69048000	0.725982	0.803387	0.863203	0.465032	0.582519	0.573383	0.00934354	1.47605
J9P3M1	J9P3M1	tr|J9P3M1|J9P3M1_CANLF LIM and SH3 protein 1 OS=Canis lupus familiaris GN=LASP1 PE=4 SV=1	1	13	13	13	58.8	29.782	262	63.25	6416800000	1.13809	1.32859	1.20089	0.894398	0.779927	0.896747	0.00579654	1.42648
Q29471;J9P497	Q29471;J9P497	sp|Q29471|ANX13_CANLF Annexin A13 OS=Canis lupus familiaris GN=ANXA13 PE=1 SV=2;tr|J9P497|J9P497_CANLF Annexin OS=Canis lupus familiaris GN=ANXA13 PE=3 SV=1	2	9	9	9	32.6	35.479	316	108.61	1632400000	1.46152	1.18775	1.43947	0.731695	0.809354	0.665228	0.0029631	1.85323
J9P4F3;F1PKR3;G8C7I1	J9P4F3;F1PKR3;G8C7I1	tr|J9P4F3|J9P4F3_CANLF Vinculin OS=Canis lupus familiaris GN=VCL PE=4 SV=1;tr|F1PKR3|F1PKR3_CANLF Vinculin OS=Canis lupus familiaris GN=VCL PE=4 SV=2;tr|G8C7I1|G8C7I1_CANLF Metavinculin variant (Fragment) OS=Canis lupus familiaris PE=2 SV=1	3	48	48	48	50.6	116.8	1074	284.39	20146000000	1.17156	1.16432	1.1006	0.968237	0.967117	0.878794	0.00508389	1.22114
J9P4U8	J9P4U8	tr|J9P4U8|J9P4U8_CANLF Uncharacterized protein OS=Canis lupus familiaris PE=4 SV=1	1	4	4	4	12.9	41.385	379	21.053	1655300000	1.1215	1.18312	1.22597	0.942263	0.999077	0.971732	0.00395205	1.21198
J9P4Y2	J9P4Y2	tr|J9P4Y2|J9P4Y2_CANLF Protein S100 OS=Canis lupus familiaris GN=S100A2 PE=3 SV=1	1	3	3	3	40.2	10.969	97	16.037	27224000000	1.94793	1.75884	1.54299	0.507379	0.536155	0.570529	0.000513442	3.25251
J9P516	J9P516	tr|J9P516|J9P516_CANLF VPS26, retromer complex component B OS=Canis lupus familiaris GN=VPS26B PE=4 SV=1	1	5	4	4	18.8	35.902	309	14.991	230960000	1.21058	1.21109	1.00451	0.897673	0.877461	0.79151	0.0196782	1.33489
J9P5E0	J9P5E0	tr|J9P5E0|J9P5E0_CANLF Pyridoxal kinase OS=Canis lupus familiaris GN=PDXK PE=4 SV=1	1	1	1	1	3.9	31.706	285	2.8102	23110000	1.38425	1.2362	1.20825	0.895148	1.01648	0.690251	0.0203648	1.47151
J9P5F3;E2RMX9;J9NVL3	J9P5F3;E2RMX9;J9NVL3	tr|J9P5F3|J9P5F3_CANLF Aconitase 1 OS=Canis lupus familiaris GN=ACO1 PE=3 SV=1;tr|E2RMX9|E2RMX9_CANLF Aconitase 1 OS=Canis lupus familiaris GN=ACO1 PE=3 SV=2;tr|J9NVL3|J9NVL3_CANLF Aconitase 1 OS=Canis lupus familiaris GN=ACO1 PE=3 SV=1	3	12	12	11	15.5	99.683	901	25.438	1324000000	1.17148	1.4515	1.14927	0.935651	0.855923	0.941895	0.0266706	1.38003
J9P5N6	J9P5N6	tr|J9P5N6|J9P5N6_CANLF ADP ribosylation factor 4 OS=Canis lupus familiaris GN=ARF4 PE=3 SV=1	1	7	4	3	51.7	20.527	180	15.561	2534100000	1.26012	1.41588	1.13349	0.98641	0.939678	0.99582	0.0239306	1.30377
J9P688;E2RIH1	J9P688;E2RIH1	tr|J9P688|J9P688_CANLF Dopey family member 2 OS=Canis lupus familiaris GN=DOPEY2 PE=4 SV=1;tr|E2RIH1|E2RIH1_CANLF Dopey family member 2 OS=Canis lupus familiaris GN=DOPEY2 PE=4 SV=2	2	2	2	2	0.9	258.13	2298	2.3506	635510000	1.2618	1.50208	1.43178	1.05791	0.941769	1.14644	0.0195579	1.3336
J9P6N4	J9P6N4	tr|J9P6N4|J9P6N4_CANLF Tyrosine 3-monooxygenase/tryptophan 5-monooxygenase activation protein eta OS=Canis lupus familiaris GN=YWHAH PE=3 SV=1	1	11	9	8	47.6	28.211	246	50.927	11497000000	1.21068	1.22082	1.18714	0.977177	0.969091	0.966185	2.34939e-05	1.24247
J9P7A6	J9P7A6	tr|J9P7A6|J9P7A6_CANLF Uncharacterized protein OS=Canis lupus familiaris PE=4 SV=1	1	15	1	0	63	28.196	257	10.217	3943400000	1.3995	1.45908	1.35898	0.996394	0.670872	0.707215	0.00456095	1.77621
J9P7P2;L7N0B9	J9P7P2	tr|J9P7P2|J9P7P2_CANLF Uncharacterized protein OS=Canis lupus familiaris GN=LOC610164 PE=3 SV=1	2	9	9	8	43.3	30.615	277	48.496	4092300000	1.51521	1.53744	1.40177	0.740289	0.728541	0.835251	0.000184954	1.93327
J9P7W8	J9P7W8	tr|J9P7W8|J9P7W8_CANLF Inositol-1-monophosphatase OS=Canis lupus familiaris GN=IMPA1 PE=3 SV=1	1	6	6	6	21.3	30.244	277	14.191	1051400000	1.13921	1.17382	1.07854	0.966163	0.925624	0.925975	0.00347303	1.20364
J9P9J4;E2RMX7;J9NS92;E2RHQ0;J9NU12;E2R543;F1PGT3;F1PBJ8	J9P9J4;E2RMX7;J9NS92	tr|J9P9J4|J9P9J4_CANLF Uncharacterized protein OS=Canis lupus familiaris GN=ALDH1A1 PE=3 SV=1;tr|E2RMX7|E2RMX7_CANLF Uncharacterized protein OS=Canis lupus familiaris GN=ALDH1A1 PE=3 SV=2;tr|J9NS92|J9NS92_CANLF Uncharacterized protein OS=Canis lupus famili	8	5	5	4	14.7	52.957	484	12.969	275170000	1.28799	1.33119	1.16396	0.66513	0.718186	0.757678	0.000650217	1.767
J9P9V0	J9P9V0	tr|J9P9V0|J9P9V0_CANLF Uncharacterized protein OS=Canis lupus familiaris PE=3 SV=1	1	8	7	7	55.6	14.439	124	32.531	19256000000	1.23892	1.23347	1.23599	1.02429	0.904516	0.991184	0.00182268	1.27
J9PA14	J9PA14	tr|J9PA14|J9PA14_CANLF CD99 molecule (Xg blood group) OS=Canis lupus familiaris GN=CD99 PE=4 SV=1	1	1	1	1	11.6	16.047	155	11.237	244030000	1.22707	1.14449	1.14272	1.02442	0.919564	0.788777	0.0240487	1.28598
J9PAN4	J9PAN4	tr|J9PAN4|J9PAN4_CANLF Lysophospholipase II OS=Canis lupus familiaris GN=LYPLA2 PE=4 SV=1	1	4	4	4	17.7	24.737	231	14.922	1546700000	1.26946	1.33631	1.22555	0.931722	0.817883	0.902362	0.00110989	1.4447
J9PAX0;F1P9Q4	J9PAX0	tr|J9PAX0|J9PAX0_CANLF Cullin 5 OS=Canis lupus familiaris GN=CUL5 PE=3 SV=1	2	4	4	4	6.1	88.487	759	7.2346	310390000	1.36112	1.32861	1.31721	0.935728	0.895414	0.998568	0.000278703	1.41603
K7ZSN9;F1PPI5	K7ZSN9;F1PPI5	tr|K7ZSN9|K7ZSN9_CANLF Amino acid transporter OS=Canis lupus familiaris GN=SLC1A5 PE=2 SV=1;tr|F1PPI5|F1PPI5_CANLF Amino acid transporter OS=Canis lupus familiaris GN=SLC1A5 PE=3 SV=1	2	6	6	5	17.6	57.18	544	45.933	1379400000	1.0356	1.11646	1.09963	0.871968	0.853412	0.957521	0.00938077	1.212
L7N069;F1PT17	L7N069;F1PT17	tr|L7N069|L7N069_CANLF Ubiquitin carboxyl-terminal hydrolase OS=Canis lupus familiaris GN=UCHL3 PE=3 SV=1;tr|F1PT17|F1PT17_CANLF Ubiquitin C-terminal hydrolase L3 OS=Canis lupus familiaris GN=UCHL3 PE=4 SV=1	2	4	4	4	23.9	24.691	218	8.1948	222080000	1.10577	1.09526	1.36898	0.879043	0.829261	0.834477	0.0196722	1.40398
O02812	O02812	sp|O02812|MK14_CANLF Mitogen-activated protein kinase 14 OS=Canis lupus familiaris GN=MAPK14 PE=2 SV=3	1	2	2	2	5.3	41.265	360	4.3516	130860000	1.07975	1.04152	1.14241	0.807783	0.961929	0.762097	0.0221803	1.28907
P00011	P00011	sp|P00011|CYC_CANLF Cytochrome c OS=Canis lupus familiaris GN=CYCS PE=1 SV=2	1	4	4	4	47.6	11.632	105	15.138	1953200000	1.15087	1.07684	1.06965	0.895234	0.792223	0.830969	0.00282515	1.30929
P05124;F1PK49;A0A0A0MPB4;P05123;L7N0L9;F1PGF8	P05124	sp|P05124|KCRB_CANLF Creatine kinase B-type OS=Canis lupus familiaris GN=CKB PE=1 SV=1	6	15	15	15	51.7	42.701	381	266.74	56925000000	1.44934	1.37714	1.45136	0.745836	0.770165	0.787898	1.75385e-05	1.85678
P62825;F1PR82	P62825;F1PR82	sp|P62825|RAN_CANLF GTP-binding nuclear protein Ran OS=Canis lupus familiaris GN=RAN PE=1 SV=3;tr|F1PR82|F1PR82_CANLF GTP-binding nuclear protein Ran OS=Canis lupus familiaris GN=RAN PE=3 SV=2	2	8	8	8	33.3	24.423	216	30.417	26231000000	1.22028	1.13517	1.14971	0.977705	0.920281	0.958645	0.00228908	1.22703
P62999;F1P7Q4;E2RJH1;F1PW88	P62999;F1P7Q4;E2RJH1	sp|P62999|RAC1_CANLF Ras-related C3 botulinum toxin substrate 1 OS=Canis lupus familiaris GN=RAC1 PE=2 SV=1;tr|F1P7Q4|F1P7Q4_CANLF Ras-related C3 botulinum toxin substrate 1 OS=Canis lupus familiaris GN=RAC1 PE=3 SV=2;tr|E2RJH1|E2RJH1_CANLF Ras-related C3	4	8	8	0	43.8	21.45	192	28.285	9851300000	1.14716	1.16356	1.09915	0.888223	0.892281	0.986346	0.00460291	1.2324
Q004B2;Q004B1;Q004B0;J9P5R8;Q004A8;Q004A9;E2R9V7;A1YV60;E2R9W0;F1PCZ8	Q004B2;Q004B1;Q004B0	tr|Q004B2|Q004B2_CANLF Carcinoembryonic antigen-related cell adhesion molecule 1 isoform 4L OS=Canis lupus familiaris GN=CEACAM1 PE=2 SV=1;tr|Q004B1|Q004B1_CANLF Carcinoembryonic antigen-related cell adhesion molecule 1 isoform 4S OS=Canis lupus familiaris	10	6	6	5	15.9	56.421	521	31.505	2652600000	1.01535	1.1125	1.285	0.814114	0.800323	0.876268	0.0201577	1.37024
Q1HG70	Q1HG70	sp|Q1HG70|MP2K2_CANLF Dual specificity mitogen-activated protein kinase kinase 2 OS=Canis lupus familiaris GN=MAP2K2 PE=2 SV=1	1	2	2	1	3.8	44.446	400	3.032	305660000	1.33145	1.42402	1.4369	0.957104	0.835815	1.03977	0.00261915	1.47999
Q28254	Q28254	tr|Q28254|Q28254_CANLF Hypoxanthine phosphoribosyl transferase (Fragment) OS=Canis lupus familiaris GN=HPRT PE=4 SV=1	1	1	1	1	30.2	4.6984	43	3.4173	69433000	1.41541	1.9028	1.42381	0.914103	0.903167	0.89594	0.0137399	1.74775
Q29476	Q29476	sp|Q29476|ST1A1_CANLF Sulfotransferase 1A1 OS=Canis lupus familiaris GN=SULT1A1 PE=1 SV=1	1	6	6	6	24.7	34.115	295	17.849	543280000	1.04052	1.1261	1.16413	0.82524	0.868424	0.88176	0.00335787	1.29328
Q3YIX4;F1P699	Q3YIX4;F1P699	sp|Q3YIX4|PEBP1_CANLF Phosphatidylethanolamine-binding protein 1 OS=Canis lupus familiaris GN=PEBP1 PE=1 SV=1;tr|F1P699|F1P699_CANLF Phosphatidylethanolamine-binding protein 1 OS=Canis lupus familiaris GN=PEBP1 PE=4 SV=2	2	10	10	10	68.4	20.921	187	62.597	24905000000	1.54829	1.4753	1.43735	0.728135	0.718479	0.652404	4.05779e-05	2.12526
Q50KA9;J9P4I5;J9P9D9;J9NWI3	Q50KA9;J9P4I5	sp|Q50KA9|NDKA_CANLF Nucleoside diphosphate kinase A OS=Canis lupus familiaris GN=NME1 PE=2 SV=1;tr|J9P4I5|J9P4I5_CANLF Nucleoside diphosphate kinase OS=Canis lupus familiaris PE=3 SV=1	4	12	3	1	73.7	17.18	152	8.3522	2539900000	1.29086	1.24983	1.16741	0.9144	0.698096	0.86192	0.00527741	1.49858
Q53VB8;E2RMZ3;E2RRH1;J9P5S0;J9P895	Q53VB8;E2RMZ3;E2RRH1;J9P5S0	sp|Q53VB8|FRIL_CANLF Ferritin light chain OS=Canis lupus familiaris GN=FTL PE=2 SV=3;tr|E2RMZ3|E2RMZ3_CANLF Ferritin OS=Canis lupus familiaris PE=3 SV=2;tr|E2RRH1|E2RRH1_CANLF Ferritin OS=Canis lupus familiaris PE=3 SV=1;tr|J9P5S0|J9P5S0_CANLF Ferritin OS=	5	9	9	9	69.1	20.095	175	43.568	2549600000	1.57952	1.64005	1.32802	0.618095	0.626594	0.772211	0.00144146	2.25474
Q5TJE6	Q5TJE6	sp|Q5TJE6|PFD6_CANLF Prefoldin subunit 6 OS=Canis lupus familiaris GN=PFDN6 PE=3 SV=1	1	4	4	4	32.6	14.572	129	20.628	500480000	1.27644	1.26693	1.34377	0.957216	0.883173	0.923612	0.00031646	1.40635
Q5WR09	Q5WR09	sp|Q5WR09|VATG1_CANLF V-type proton ATPase subunit G 1 OS=Canis lupus familiaris GN=ATP6V1G1 PE=3 SV=3	1	1	1	1	12.7	13.592	118	19.439	2085400000	1.18697	1.21929	1.25879	0.91663	0.804104	0.974036	0.00392293	1.36006
Q7YRF1;F1PVY2;F1P7W8;J9P1J6	Q7YRF1;F1PVY2	sp|Q7YRF1|AP3B1_CANLF AP-3 complex subunit beta-1 OS=Canis lupus familiaris GN=AP3B1 PE=2 SV=1;tr|F1PVY2|F1PVY2_CANLF AP-3 complex subunit beta OS=Canis lupus familiaris GN=AP3B1 PE=3 SV=2	4	10	10	10	8.5	121.19	1091	18.081	666310000	1.14868	1.08344	1.10852	0.922424	0.71347	0.836717	0.0103939	1.35106
Q863Z4	Q863Z4	sp|Q863Z4|MTPN_CANLF Myotrophin OS=Canis lupus familiaris GN=MTPN PE=3 SV=3	1	4	4	3	30.5	12.895	118	9.0343	1589700000	1.53745	1.52089	1.46366	1.11995	0.985934	0.913419	0.00148132	1.4977
Q8HX86;Q8HYE0;Q8HYE1	Q8HX86;Q8HYE0	sp|Q8HX86|TPMT_CANLF Thiopurine S-methyltransferase OS=Canis lupus familiaris GN=TPMT PE=2 SV=1;tr|Q8HYE0|Q8HYE0_CANLF Thiopurine S-methyltransferase OS=Canis lupus familiaris GN=TPMT PE=4 SV=1	3	7	7	7	31.8	28.427	245	45.261	1726900000	1.63392	1.44727	1.39049	0.646052	0.808867	0.833663	0.00151041	1.95391
Q8WNN6	Q8WNN6	sp|Q8WNN6|SODC_CANLF Superoxide dismutase [Cu-Zn] OS=Canis lupus familiaris GN=SOD1 PE=2 SV=1	1	3	3	1	21.6	15.801	153	28.375	3778700000	1.54813	1.39495	1.29413	0.841948	0.731865	0.848719	0.00188303	1.74908
Q95MP7	Q95MP7	sp|Q95MP7|FRIH_CANLF Ferritin heavy chain OS=Canis lupus familiaris GN=FTH1 PE=2 SV=3	1	8	8	8	56.8	21.308	183	37.794	6840600000	1.48852	1.43427	1.22879	0.650474	0.655956	0.676332	0.000810605	2.09384
Q9MYU9	Q9MYU9	tr|Q9MYU9|Q9MYU9_CANLF Phospholipid hydroperoxide glutathione peroxidase (Fragment) OS=Canis lupus familiaris GN=php PE=2 SV=2	1	1	1	1	14.3	10.748	98	3.655	241820000	1.24254	1.08896	1.10742	1.01768	0.831128	0.882475	0.0329526	1.25909
Q9MZD3;F1PK62;E2RKD3	Q9MZD3;F1PK62	tr|Q9MZD3|Q9MZD3_CANLF Peptidyl-prolyl cis-trans isomerase (Fragment) OS=Canis lupus familiaris PE=2 SV=1;tr|F1PK62|F1PK62_CANLF Peptidyl-prolyl cis-trans isomerase OS=Canis lupus familiaris PE=3 SV=1	3	9	9	4	50	16.933	156	23.175	168000000000	1.56555	1.52543	1.47161	0.852906	0.749671	0.788003	5.81044e-05	1.90857
Q9TQX6;F1PAC7;J9NTT2;Q7M3A6	Q9TQX6;F1PAC7;J9NTT2;Q7M3A6	sp|Q9TQX6|ACBP_CANLF Acyl-CoA-binding protein OS=Canis lupus familiaris GN=DBI PE=1 SV=2;tr|F1PAC7|F1PAC7_CANLF Acyl-CoA-binding protein OS=Canis lupus familiaris GN=DBI PE=4 SV=2;tr|J9NTT2|J9NTT2_CANLF Acyl-CoA-binding protein OS=Canis lupus familiaris GN	4	4	4	4	56.3	9.9782	87	12.818	6165600000	1.6432	1.38871	1.30836	0.715938	0.793157	0.732401	0.00250904	1.93633
Q9TV56	Q9TV56	sp|Q9TV56|S10A4_CANLF Protein S100-A4 OS=Canis lupus familiaris GN=S100A4 PE=3 SV=1	1	2	2	2	19.8	11.847	101	5.6495	501840000	1.31981	0.947175	1.37008	0.712844	0.868431	0.521776	0.0374897	1.72943
A0A193BKX7;A0A0K0K968;A0A0K0K935;A0A0K0K835;A0A060GW50;A0A060GW39;A0A060GVT9;A0A060GUX1;A0A060GPK0;A0A060GKU4;A0A060GKL4;V5LKJ7;V5LKK6;V5LJT6;V5LHQ1;Q9ZZ62;Q49RZ7;Q49RU5;Q1HKK2;Q1HKG3;H8Y4V4;H8Y4D5;H8Y3X9;H8Y3L2;H8Y357;H8Y305;H8Y2Q1;D4QA78;C4MVX9;C4MV95;C4MT93;C4MT67;C4MSX6;C4MSS4;C4MSN5;C4MSF7;C4MS01;B9TZP3;B9TZC6;B9TY57;A0A172RTU1;A0A172RS04;A0A172RPV6;A0A172RPR2;A0A172RMU8;A0A172RMH4;A0A172RM4…	A0A193BKX7;A0A0K0K968;A0A0K0K935;A0A0K0K835;A0A060GW50;A0A060GW39;A0A060GVT9;A0A060GUX1;A0A060GPK0;A0A060GKU4;A0A060GKL4;V5LKJ7;V5LKK6;V5LJT6;V5LHQ1;Q9ZZ62;Q49RZ7;Q49RU5;Q1HKK2;Q1HKG3;H8Y4V4;H8Y4D5;H8Y3X9;H8Y3L2;H8Y357;H8Y305;H8Y2Q1;D4QA78;C4MVX9;C4MV95;C4MT93;C4MT67;C4MSX6;C4MSS4;C4MSN5;C4MSF7;C4MS01;B9TZP3;B9TZC6;B9TY57;A0A172RTU1;A0A172RS04;A0A172RPV6;A0A172RPR2;A0A172RMU8;A0A172RMH4;A0A172RM4…	tr|A0A193BKX7|A0A193BKX7_CANLF ATP synthase F0 subunit 6 (Fragment) OS=Canis lupus familiaris GN=ATP6 PE=4 SV=1;tr|A0A0K0K968|A0A0K0K968_CANLF ATP synthase F0 subunit 6 (Fragment) OS=Canis lupus familiaris GN=ATP6 PE=4 SV=1;tr|A0A0K0K935|A0A0K0K935_CANLF A	63	1	1	1	7.8	12.812	115	2.8303	1377600000	0.725538	0.849067	0.807294	1.03522	1.08587	1.03747	0.00289903	0.754108
A0A0N9JIB9;F1P916	A0A0N9JIB9;F1P916	tr|A0A0N9JIB9|A0A0N9JIB9_CANLF Tropomyosin 1 alpha OS=Canis lupus familiaris GN=Tpm1 PE=2 SV=1;tr|F1P916|F1P916_CANLF Tropomyosin 1 OS=Canis lupus familiaris GN=TPM1 PE=3 SV=2	2	10	4	1	31.3	32.71	284	26.366	3072600000	0.606202	0.787341	0.728282	1.44921	1.37238	1.6016	0.000869986	0.479704
A0A0N9JS23;E2RBW4	A0A0N9JS23;E2RBW4	tr|A0A0N9JS23|A0A0N9JS23_CANLF Tropomyosin 3 gamma OS=Canis lupus familiaris GN=Tpm3 PE=2 SV=1;tr|E2RBW4|E2RBW4_CANLF Tropomyosin 3 OS=Canis lupus familiaris GN=TPM3 PE=3 SV=2	2	12	3	1	35.9	32.818	284	7.3947	2344500000	0.677311	0.804018	0.829978	1.4417	1.59131	1.32404	0.00166715	0.530476
A0A140T8E6;Q6VAH9	A0A140T8E6	tr|A0A140T8E6|A0A140T8E6_CANLF Junction plakoglobin OS=Canis lupus familiaris GN=JUP PE=4 SV=1	2	30	30	28	54.7	81.758	744	268.48	28863000000	0.742599	0.66106	0.745422	1.15223	1.27783	1.31706	0.000724565	0.573529
A0A1B1X461;E2RNY7;J9NZA4;J9P6P6	A0A1B1X461;E2RNY7	tr|A0A1B1X461|A0A1B1X461_CANLF ATP synthase subunit gamma OS=Canis lupus familiaris PE=2 SV=1;tr|E2RNY7|E2RNY7_CANLF Uncharacterized protein OS=Canis lupus familiaris PE=4 SV=2	4	8	8	8	27.9	33.053	298	29.969	13964000000	0.844435	0.787069	0.895498	1.0051	1.06611	1.05267	0.00543742	0.808932
F1PBH2;F1PCT7;A0A1W2NCW3	F1PBH2;F1PCT7;A0A1W2NCW3	tr|F1PBH2|F1PBH2_CANLF Dolichyl-diphosphooligosaccharide--protein glycosyltransferase subunit 2 OS=Canis lupus familiaris GN=RPN2 PE=4 SV=2;sp|F1PCT7|RPN2_CANLF Dolichyl-diphosphooligosaccharide--protein glycosyltransferase subunit 2 OS=Canis lupus familia	3	11	11	11	28.5	61.647	562	166.06	23107000000	0.803711	0.78233	0.923339	1.01901	1.09304	1.18274	0.0153978	0.761621
A0A292G3E4;F1PEZ8;P18466;F1PE32;W8G038;G3DTQ1;A0A1C9T7K7;A0A1B4XK92;A0A1B4XK89;A0A1B4XK80;A0A1B4XK75;A0A140KFR4;A0A140KFQ5;A0A140KFQ1;L7N049;Q5WR11;O46881;O98091;O98079;O98078;O98077;O98076;O98075;O98073;A0A1C9T7J9;A0A1C9T7I1;A0A1C9T7D2;A0A140KFQ7;A0A140KFP8;A0A0M4FRS2;A0A0K0VL44;A0A1B4XK90;Q1AN86;Q1AN87;A0A140KFQ8;A0A140KFT0;O98092;O98087;O98086;O98085;O98084;O98081;O98074;O98064;O98060;O98057;O…	A0A292G3E4;F1PEZ8;P18466;F1PE32	tr|A0A292G3E4|A0A292G3E4_CANLF DLA class I molecule OS=Canis lupus familiaris GN=DLA-88 PE=3 SV=1;tr|F1PEZ8|F1PEZ8_CANLF Uncharacterized protein OS=Canis lupus familiaris GN=DLA-12 PE=3 SV=2;sp|P18466|HA19_CANLF DLA class I histocompatibility antigen, A9/A	126	9	9	0	30.7	40.2	361	23.401	1629600000	0.862501	0.892159	0.874246	0.999703	1.167	1.16241	0.0137927	0.789673
A7YH32;F1PLU8	A7YH32;F1PLU8	sp|A7YH32|CING_CANLF Cingulin OS=Canis lupus familiaris GN=CGN PE=2 SV=1;tr|F1PLU8|F1PLU8_CANLF Cingulin OS=Canis lupus familiaris GN=CGN PE=4 SV=2	2	17	17	17	17.1	135.53	1190	113.46	2508900000	0.796816	0.834964	0.816546	1.04076	1.18867	1.07096	0.00362102	0.741829
B6V8E6	B6V8E6	sp|B6V8E6|CTNB1_CANLF Catenin beta-1 OS=Canis lupus familiaris GN=CTNNB1 PE=1 SV=1	1	20	18	18	30	85.51	781	118.68	9536300000	0.838686	0.860893	0.877601	1.09463	1.14995	1.1681	0.000358244	0.755178
E2QRT0;J9NZR9;J9P9L9	E2QRT0	tr|E2QRT0|E2QRT0_CANLF Heterogeneous nuclear ribonucleoprotein D like OS=Canis lupus familiaris GN=HNRNPDL PE=4 SV=1	3	12	12	12	24.5	46.37	420	44.21	16855000000	0.731211	0.660039	0.6197	1.03505	1.16713	1.0477	0.00148705	0.618777
E2QRU9	E2QRU9	tr|E2QRU9|E2QRU9_CANLF RAD21 cohesin complex component OS=Canis lupus familiaris GN=RAD21 PE=4 SV=1	1	5	5	5	10.5	71.635	631	20.091	2302900000	0.89552	0.850386	1.00656	1.05317	1.22388	1.40235	0.049601	0.748074
E2QS34	E2QS34	tr|E2QS34|E2QS34_CANLF Cell division cycle and apoptosis regulator 1 OS=Canis lupus familiaris GN=CCAR1 PE=4 SV=1	1	14	14	14	13.1	132.81	1150	64.624	4586300000	0.910352	0.841976	0.916109	1.02895	1.09037	1.1423	0.00814609	0.818133
E2QTP2	E2QTP2	tr|E2QTP2|E2QTP2_CANLF Septin 11 OS=Canis lupus familiaris GN=SEPT11 PE=3 SV=1	1	9	6	4	28.2	43.42	372	30.969	836820000	0.962055	0.917867	0.897946	1.17964	1.05307	1.14137	0.00908614	0.823296
E2QV07	E2QV07	tr|E2QV07|E2QV07_CANLF Structural maintenance of chromosomes protein OS=Canis lupus familiaris GN=SMC1A PE=3 SV=2	1	22	22	22	20.8	143.22	1233	79.683	2022800000	0.925719	0.801715	0.841667	1.03955	1.11047	1.19787	0.0114091	0.767376
E2QV27	E2QV27	tr|E2QV27|E2QV27_CANLF Lamin B receptor OS=Canis lupus familiaris GN=LBR PE=4 SV=1	1	8	8	8	10.5	70.497	618	15.606	5551800000	0.782581	0.788761	0.831755	1.07747	0.98238	1.28892	0.0265345	0.717607
E2QW27	E2QW27	tr|E2QW27|E2QW27_CANLF La ribonucleoprotein domain family member 7 OS=Canis lupus familiaris GN=LARP7 PE=4 SV=1	1	12	12	12	23.2	66.659	582	32.422	1357500000	0.889708	0.89508	0.80593	1.01422	0.997193	1.12135	0.0202511	0.826976
E2QW29	E2QW29	tr|E2QW29|E2QW29_CANLF Bet1 golgi vesicular membrane trafficking protein like OS=Canis lupus familiaris GN=BET1L PE=4 SV=1	1	1	1	1	11.7	12.438	111	3.0117	281810000	0.817417	0.992707	0.967511	1.10328	1.23738	1.3291	0.0253035	0.7569
J9NWM2;F1PYJ0;E2QWQ1;J9P6E3;F1PHD8;P79145	J9NWM2;F1PYJ0;E2QWQ1;J9P6E3;F1PHD8;P79145	tr|J9NWM2|J9NWM2_CANLF cAMP responsive element binding protein 1 OS=Canis lupus familiaris GN=CREB1 PE=4 SV=1;tr|F1PYJ0|F1PYJ0_CANLF cAMP responsive element binding protein 1 OS=Canis lupus familiaris GN=CREB1 PE=4 SV=2;tr|E2QWQ1|E2QWQ1_CANLF cAMP responsi	6	2	2	1	10.9	21.759	193	5.3941	541630000	0.821791	0.700983	0.817739	1.14279	1.15595	1.35309	0.00514472	0.640916
E2QWV0;J9NZH0;F6XTU7	E2QWV0	tr|E2QWV0|E2QWV0_CANLF SWI/SNF related, matrix associated, actin dependent regulator of chromatin, subfamily a, member 5 OS=Canis lupus familiaris GN=SMARCA5 PE=3 SV=1	3	22	22	22	19.8	122	1052	58.884	5444700000	0.804889	0.86956	0.718776	1.05065	1.04743	0.979398	0.00995071	0.777659
E2QX85;E2QX86	E2QX85;E2QX86	tr|E2QX85|E2QX85_CANLF SWI/SNF related, matrix associated, actin dependent regulator of chromatin, subfamily e, member 1 OS=Canis lupus familiaris GN=SMARCE1 PE=4 SV=2;tr|E2QX86|E2QX86_CANLF SWI/SNF related, matrix associated, actin dependent regulator of	2	5	4	4	15.7	42.782	376	11.023	477660000	0.799549	0.856974	0.838393	1.11716	1.07775	1.01666	0.00210897	0.776851
E2QXA3;J9P0B6	E2QXA3;J9P0B6	tr|E2QXA3|E2QXA3_CANLF Acyl-CoA dehydrogenase, very long chain OS=Canis lupus familiaris GN=ACADVL PE=3 SV=2;tr|J9P0B6|J9P0B6_CANLF Acyl-CoA dehydrogenase, very long chain OS=Canis lupus familiaris GN=ACADVL PE=3 SV=1	2	21	21	21	35.7	74.04	687	129.83	16127000000	0.819803	0.905983	0.881185	1.06161	0.986645	1.16609	0.0251054	0.811043
E2QXC6;F1P6N7;F1P737;E2QT97	E2QXC6;F1P6N7	tr|E2QXC6|E2QXC6_CANLF Chromobox 3 OS=Canis lupus familiaris GN=CBX3 PE=4 SV=2;tr|F1P6N7|F1P6N7_CANLF Uncharacterized protein OS=Canis lupus familiaris PE=4 SV=2	4	8	8	7	42.6	20.811	183	31.019	2773800000	0.835434	0.876657	0.821445	1.13647	1.28455	1.19997	0.00139986	0.699681
J9P2E5;J9NXW9;E2QXJ7;E3TH10	J9P2E5;J9NXW9;E2QXJ7;E3TH10	tr|J9P2E5|J9P2E5_CANLF PPFIA binding protein 1 OS=Canis lupus familiaris GN=PPFIBP1 PE=4 SV=1;tr|J9NXW9|J9NXW9_CANLF PPFIA binding protein 1 OS=Canis lupus familiaris GN=PPFIBP1 PE=4 SV=1;tr|E2QXJ7|E2QXJ7_CANLF PPFIA binding protein 1 OS=Canis lupus famili	4	6	6	6	7.6	110.45	983	12.068	104380000	0.67711	0.801984	0.959463	1.01571	1.13414	1.05272	0.0456567	0.761438
F1Q317;E5Q8W9;E2QXK6;Q6QZP2	F1Q317;E5Q8W9;E2QXK6;Q6QZP2	tr|F1Q317|F1Q317_CANLF Galectin OS=Canis lupus familiaris GN=LGALS9 PE=4 SV=1;tr|E5Q8W9|E5Q8W9_CANLF Galectin OS=Canis lupus familiaris GN=LGALS9 PE=2 SV=1;tr|E2QXK6|E2QXK6_CANLF Galectin OS=Canis lupus familiaris GN=LGALS9 PE=4 SV=2;tr|Q6QZP2|Q6QZP2_CANLF	4	5	5	5	19.2	35.995	323	15.551	1072200000	0.7509	0.770226	0.754305	1.1612	1.0044	1.29524	0.00938012	0.657479
E2QXR8	E2QXR8	tr|E2QXR8|E2QXR8_CANLF RB binding protein 4, chromatin remodeling factor OS=Canis lupus familiaris GN=RBBP4 PE=4 SV=1	1	11	11	6	33.2	47.655	425	145.55	8024100000	0.852755	0.857404	0.813222	1.09904	1.17063	0.911504	0.0491895	0.793222
E2QXU5	E2QXU5	tr|E2QXU5|E2QXU5_CANLF Uncharacterized protein OS=Canis lupus familiaris GN=SF3A3 PE=4 SV=1	1	11	11	11	23.4	58.891	501	59.208	6936300000	0.766964	0.828944	0.881761	1.03732	1.02236	1.16278	0.0110629	0.768876
E2QY07;E2QY08;E2RIM9	E2QY07;E2QY08	tr|E2QY07|E2QY07_CANLF Actinin alpha 1 OS=Canis lupus familiaris GN=ACTN1 PE=4 SV=1;tr|E2QY08|E2QY08_CANLF Actinin alpha 1 OS=Canis lupus familiaris GN=ACTN1 PE=4 SV=2	3	39	26	22	52.5	102.95	892	323.31	46471000000	0.914228	0.892456	0.935008	1.06547	1.16378	1.11704	0.00286612	0.819325
J9NSV5;E2QYH2	J9NSV5;E2QYH2	tr|J9NSV5|J9NSV5_CANLF Survival motor neuron domain containing 1 OS=Canis lupus familiaris GN=SMNDC1 PE=4 SV=1;tr|E2QYH2|E2QYH2_CANLF Survival motor neuron domain containing 1 OS=Canis lupus familiaris GN=SMNDC1 PE=4 SV=2	2	3	3	3	24.4	26.725	238	43.544	457500000	0.763812	0.785744	0.926817	1.15139	1.12072	1.22702	0.00475087	0.70771
E2QYP1;F1Q3G7;L7N0C2;F1P645;L7N074;E2R5N6;E2RF95;E2RF37;F1PVY3;L7N066;F1PD20;E2RJS4;F1PQB0;E2RJI3;E2REM2;F1P8M3;F1Q2T4;J9P0Y4;E2RJS6	E2QYP1;F1Q3G7;L7N0C2;F1P645	tr|E2QYP1|E2QYP1_CANLF Heterogeneous nuclear ribonucleoprotein A1 OS=Canis lupus familiaris GN=HNRNPA1 PE=4 SV=2;tr|F1Q3G7|F1Q3G7_CANLF Heterogeneous nuclear ribonucleoprotein A1 OS=Canis lupus familiaris GN=HNRNPA1 PE=4 SV=1;tr|L7N0C2|L7N0C2_CANLF Unchara	19	16	15	7	46.1	38.819	373	323.31	128000000000	0.835594	0.741783	0.762062	1.00183	1.08997	1.08231	0.00226313	0.737038
P25473;E2QYU2	P25473;E2QYU2	sp|P25473|CLUS_CANLF Clusterin OS=Canis lupus familiaris GN=CLU PE=2 SV=1;tr|E2QYU2|E2QYU2_CANLF Clusterin OS=Canis lupus familiaris GN=CLU PE=3 SV=1	2	6	6	6	14.4	51.789	445	60.741	1493300000	0.75064	0.761181	0.760381	1.48539	1.30058	1.53453	0.000664526	0.525912
E2QZA8	E2QZA8	tr|E2QZA8|E2QZA8_CANLF Peptidylprolyl isomerase OS=Canis lupus familiaris GN=FKBP10 PE=4 SV=1	1	12	12	12	27	64.353	582	48.822	4893200000	0.823119	0.81455	0.838272	0.988396	1.26986	1.21345	0.0183314	0.713178
E2R068;E2RPP3;E2RN13	E2R068	tr|E2R068|E2R068_CANLF Uncharacterized protein OS=Canis lupus familiaris GN=RBMX PE=4 SV=2	3	16	16	16	41.6	42.46	392	86.365	18236000000	0.908792	0.827378	0.837568	1.03501	1.09136	1.06928	0.00241929	0.805388
E2R0D6	E2R0D6	tr|E2R0D6|E2R0D6_CANLF Proliferating cell nuclear antigen OS=Canis lupus familiaris GN=PCNA PE=3 SV=1	1	11	11	11	56.3	28.779	261	70.055	4704400000	0.873772	0.949941	0.8605	1.25701	1.07128	1.292	0.0134785	0.741434
E2R0G3	E2R0G3	tr|E2R0G3|E2R0G3_CANLF U2 snRNP auxiliary factor large subunit OS=Canis lupus familiaris GN=U2AF2 PE=3 SV=2	1	12	12	12	42.3	53.12	471	181.83	7066500000	0.771111	0.743122	0.870756	1.05302	1.07426	1.19517	0.00603658	0.71784
E2R185	E2R185	tr|E2R185|E2R185_CANLF Phosphatidate cytidylyltransferase OS=Canis lupus familiaris GN=CDS2 PE=3 SV=2	1	2	2	2	5.1	64.654	574	11.081	183160000	0.869302	0.760309	0.892312	1.24012	1.14098	1.27531	0.00271772	0.689726
E2R1L5	E2R1L5	tr|E2R1L5|E2R1L5_CANLF Ring finger protein 40 OS=Canis lupus familiaris GN=RNF40 PE=4 SV=1	1	3	3	2	4	113.62	1001	11.336	221040000	0.811945	1.09601	0.830426	1.123	1.34927	1.25132	0.0435606	0.735413
E2R1V3	E2R1V3	tr|E2R1V3|E2R1V3_CANLF U2 snRNP associated SURP domain containing OS=Canis lupus familiaris GN=U2SURP PE=4 SV=2	1	9	9	9	9.4	118.2	1028	21.242	1116200000	0.84289	0.906911	0.91517	1.06007	1.04672	1.17632	0.0118987	0.811721
E2R2A8;J9NSX4	E2R2A8;J9NSX4	tr|E2R2A8|E2R2A8_CANLF Uncharacterized protein OS=Canis lupus familiaris GN=LOC100686524 PE=4 SV=1;tr|J9NSX4|J9NSX4_CANLF Uncharacterized protein OS=Canis lupus familiaris PE=4 SV=1	2	9	9	8	41.3	25.413	225	36.562	5253600000	0.739023	0.786519	0.798338	1.03953	0.987693	1.13315	0.00381874	0.73532
E2R2C8	E2R2C8	tr|E2R2C8|E2R2C8_CANLF Keratin 80 OS=Canis lupus familiaris GN=KRT80 PE=3 SV=1	1	20	19	18	47	50.601	453	59.841	3759500000	0.796993	0.737577	0.717695	1.07212	1.16908	1.34993	0.00624814	0.627174
E2R3B5;J9P2Z0	E2R3B5;J9P2Z0	tr|E2R3B5|E2R3B5_CANLF Dpy-30, histone methyltransferase complex regulatory subunit OS=Canis lupus familiaris GN=DPY30 PE=4 SV=1;tr|J9P2Z0|J9P2Z0_CANLF Dpy-30, histone methyltransferase complex regulatory subunit OS=Canis lupus familiaris GN=DPY30 PE=4 SV=	2	1	1	1	9.1	11.236	99	2.0282	1056200000	0.86523	0.950383	0.985254	1.13671	1.08168	1.24451	0.0208391	0.80882
E2R3P0;J9P9V9	E2R3P0;J9P9V9	tr|E2R3P0|E2R3P0_CANLF NOC2 like nucleolar associated transcriptional repressor OS=Canis lupus familiaris GN=NOC2L PE=4 SV=2;tr|J9P9V9|J9P9V9_CANLF NOC2 like nucleolar associated transcriptional repressor OS=Canis lupus familiaris GN=NOC2L PE=4 SV=1	2	8	8	8	12.7	86.533	757	43.191	1729200000	0.766345	0.814354	0.76425	1.05989	1.03543	1.12673	0.000778863	0.727782
E2R3X4;Q28269;F1PZF7;Q9N0W3;J9P475	E2R3X4;Q28269;F1PZF7;Q9N0W3;J9P475	tr|E2R3X4|E2R3X4_CANLF Occludin OS=Canis lupus familiaris GN=OCLN PE=4 SV=2;sp|Q28269|OCLN_CANLF Occludin OS=Canis lupus familiaris GN=OCLN PE=1 SV=1;tr|F1PZF7|F1PZF7_CANLF Occludin OS=Canis lupus familiaris GN=OCLN PE=4 SV=1;tr|Q9N0W3|Q9N0W3_CANLF Occludi	5	2	2	2	3.7	59.16	520	5.5579	395050000	0.875174	0.730182	0.928199	1.23339	1.24326	1.37266	0.00411502	0.658184
E2R415	E2R415	tr|E2R415|E2R415_CANLF Thioredoxin related transmembrane protein 2 OS=Canis lupus familiaris GN=TMX2 PE=4 SV=1	1	6	6	6	24.7	34.09	296	23.591	1077700000	0.827874	0.866668	0.818548	1.13085	1.12039	1.27636	0.00297771	0.712408
E2R476	E2R476	tr|E2R476|E2R476_CANLF HEAT repeat containing 1 OS=Canis lupus familiaris GN=HEATR1 PE=4 SV=1	1	20	20	20	11.1	242.58	2141	48.906	1864900000	0.875605	0.945565	0.814068	1.03097	1.00199	1.1629	0.0401654	0.824579
E2R4C5	E2R4C5	tr|E2R4C5|E2R4C5_CANLF Uncharacterized protein OS=Canis lupus familiaris GN=ATP5L PE=4 SV=1	1	3	3	3	38.8	11.398	103	12.834	4792300000	0.904742	0.752587	0.823918	1.0297	1.10855	1.15953	0.00932879	0.7524
E2R4H6	E2R4H6	tr|E2R4H6|E2R4H6_CANLF WD repeat domain 5 OS=Canis lupus familiaris GN=WDR5 PE=4 SV=2	1	7	7	7	25.4	36.588	334	16.578	1227200000	0.823972	0.788132	0.871794	1.12816	1.1357	1.19303	0.000516258	0.718535
E2R4I0;J9P3I5	E2R4I0;J9P3I5	tr|E2R4I0|E2R4I0_CANLF Pre-mRNA processing factor 3 OS=Canis lupus familiaris GN=PRPF3 PE=4 SV=1;tr|J9P3I5|J9P3I5_CANLF Pre-mRNA processing factor 3 OS=Canis lupus familiaris GN=PRPF3 PE=4 SV=1	2	10	10	10	18.3	77.528	683	48.172	585010000	0.799718	0.723609	0.852259	0.988746	1.09518	1.07462	0.0062331	0.752115
E2R4L0;F6XHX3;J9P448	E2R4L0	tr|E2R4L0|E2R4L0_CANLF RNA binding motif protein 39 OS=Canis lupus familiaris GN=RBM39 PE=4 SV=1	3	10	10	10	20.8	59.379	530	29.014	1570600000	0.825796	0.76341	0.907417	1.14406	1.13449	1.17337	0.0018216	0.723257
J9NTS7;J9NW55;E2R4W7;J9P8L3	J9NTS7;J9NW55;E2R4W7;J9P8L3	tr|J9NTS7|J9NTS7_CANLF Uncharacterized protein OS=Canis lupus familiaris GN=LOC489591 PE=4 SV=1;tr|J9NW55|J9NW55_CANLF Uncharacterized protein OS=Canis lupus familiaris GN=LOC489591 PE=4 SV=1;tr|E2R4W7|E2R4W7_CANLF Uncharacterized protein OS=Canis lupus fa	4	8	8	8	10.1	91.085	782	26.741	579650000	0.831661	0.882091	0.857349	1.02605	1.0355	1.21283	0.0198979	0.785218
M9PM25;E2R552;M9PLJ9	M9PM25;E2R552;M9PLJ9	tr|M9PM25|M9PM25_CANLF RNA-binding protein Raly short isoform OS=Canis lupus familiaris GN=RALY PE=2 SV=1;tr|E2R552|E2R552_CANLF RALY heterogeneous nuclear ribonucleoprotein OS=Canis lupus familiaris GN=RALY PE=4 SV=1;tr|M9PLJ9|M9PLJ9_CANLF RNA-binding pro	3	12	12	12	49.8	29.655	277	44.53	3179000000	0.792762	0.735097	0.759316	1.11523	1.07504	1.24217	0.00197891	0.666341
E2R5J1;F6XFN1;J9NTA0	E2R5J1;F6XFN1;J9NTA0	tr|E2R5J1|E2R5J1_CANLF Regulator of chromosome condensation 1 OS=Canis lupus familiaris GN=RCC1 PE=4 SV=2;tr|F6XFN1|F6XFN1_CANLF Regulator of chromosome condensation 1 OS=Canis lupus familiaris GN=RCC1 PE=4 SV=1;tr|J9NTA0|J9NTA0_CANLF Regulator of chromoso	3	8	8	8	27.2	45.369	423	57.663	2422700000	0.80833	0.794153	0.819843	1.08758	1.17616	1.20371	0.000625289	0.698591
E2R6E4;J9P972	E2R6E4;J9P972	tr|E2R6E4|E2R6E4_CANLF DAZ associated protein 1 OS=Canis lupus familiaris GN=DAZAP1 PE=4 SV=1;tr|J9P972|J9P972_CANLF DAZ associated protein 1 OS=Canis lupus familiaris GN=DAZAP1 PE=4 SV=1	2	7	7	7	23.1	43.397	407	38.805	2721500000	0.819705	0.821348	0.857462	1.01649	1.01904	1.14579	0.00687141	0.785372
E2R6K5;F6XQ29;J9P371	E2R6K5;F6XQ29;J9P371	tr|E2R6K5|E2R6K5_CANLF Histone H3 OS=Canis lupus familiaris GN=H3F3B PE=3 SV=1;tr|F6XQ29|F6XQ29_CANLF Histone H3 OS=Canis lupus familiaris GN=H3F3A PE=3 SV=1;tr|J9P371|J9P371_CANLF Histone H3 OS=Canis lupus familiaris GN=LOC612779 PE=3 SV=1	3	5	1	1	28.7	15.328	136	-2	1184700000	0.957248	0.835134	0.799281	1.06959	1.03462	1.17632	0.0230634	0.790015
E2R771	E2R771	tr|E2R771|E2R771_CANLF Uncharacterized protein OS=Canis lupus familiaris GN=RBM3 PE=4 SV=2	1	4	4	4	37	17.684	162	73.512	5851000000	0.837834	0.699638	0.748968	1.07742	1.18729	1.23577	0.00282558	0.653178
E2R7B5	E2R7B5	tr|E2R7B5|E2R7B5_CANLF Radical S-adenosyl methionine domain containing 2 OS=Canis lupus familiaris GN=RSAD2 PE=4 SV=1	1	8	8	8	28.3	41.589	361	77.771	2161100000	0.692405	0.63351	0.608779	0.943259	1.0501	1.2173	0.00701804	0.602585
E2R7R1	E2R7R1	tr|E2R7R1|E2R7R1_CANLF ISG15 ubiquitin-like modifier OS=Canis lupus familiaris GN=ISG15 PE=4 SV=2	1	7	7	7	54	19.004	174	49.997	5021500000	0.689004	0.507586	0.670162	1.32754	1.25457	1.37964	0.000508719	0.471195
E2R8C0	E2R8C0	tr|E2R8C0|E2R8C0_CANLF Apoptotic chromatin condensation inducer 1 OS=Canis lupus familiaris GN=ACIN1 PE=4 SV=1	1	17	17	17	13.1	151.83	1339	49.498	2704000000	0.833154	0.981698	0.870438	1.07217	1.20533	1.02061	0.044865	0.814192
E2R8D6	E2R8D6	tr|E2R8D6|E2R8D6_CANLF Heterogeneous nuclear ribonucleoprotein H1 OS=Canis lupus familiaris GN=HNRNPH1 PE=4 SV=2	1	16	16	7	49.9	48.263	439	173.25	38728000000	0.82914	0.878929	0.809354	1.04364	1.02758	1.14949	0.00572595	0.781637
E2R8F6;F1P674	E2R8F6	tr|E2R8F6|E2R8F6_CANLF CUGBP Elav-like family member 1 OS=Canis lupus familiaris GN=CELF1 PE=4 SV=1	2	6	6	6	13.8	55.074	513	15.69	658480000	0.831358	0.895227	0.823213	1.05304	1.06118	1.05575	0.00083326	0.804361
E2R8P6	E2R8P6	tr|E2R8P6|E2R8P6_CANLF THO complex 6 OS=Canis lupus familiaris GN=THOC6 PE=4 SV=2	1	2	2	2	6.7	37.554	341	5.2229	181620000	0.786149	0.768343	0.901317	1.09963	1.26656	1.3389	0.00714917	0.662821
E2R8T8;J9NZQ1	E2R8T8;J9NZQ1	tr|E2R8T8|E2R8T8_CANLF HIV-1 Tat specific factor 1 OS=Canis lupus familiaris GN=HTATSF1 PE=4 SV=2;tr|J9NZQ1|J9NZQ1_CANLF HIV-1 Tat specific factor 1 OS=Canis lupus familiaris GN=HTATSF1 PE=4 SV=1	2	5	5	5	6.8	86.087	750	11.731	317050000	0.828938	0.94589	0.71066	1.0705	1.20198	1.21639	0.01527	0.712403
E2R944	E2R944	tr|E2R944|E2R944_CANLF Heterogeneous nuclear ribonucleoprotein L OS=Canis lupus familiaris GN=HNRNPL PE=4 SV=2	1	19	19	19	44.6	64.075	588	204.83	24944000000	0.891973	0.749842	0.83177	1.03227	1.12679	1.16451	0.00762482	0.744256
E2R948	E2R948	tr|E2R948|E2R948_CANLF Voltage dependent anion channel 2 OS=Canis lupus familiaris GN=VDAC2 PE=4 SV=2	1	16	16	16	69.7	31.578	294	191	63463000000	0.85788	0.736834	0.880325	1.01421	1.0357	1.13633	0.0152961	0.77679
E2R9S7;F1PZQ3;J9NXR7;F1Q015;F1PG43	E2R9S7	tr|E2R9S7|E2R9S7_CANLF Catenin alpha 1 OS=Canis lupus familiaris GN=CTNNA1 PE=4 SV=1	5	34	34	34	48.7	100.12	906	296.22	28379000000	0.881001	0.841042	0.917593	1.11251	1.07847	1.1541	0.00163901	0.789109
E2R9V0;J9P122	E2R9V0	tr|E2R9V0|E2R9V0_CANLF Ribosomal protein OS=Canis lupus familiaris GN=RPL10A PE=3 SV=2	2	11	11	11	46.1	24.856	217	34.801	41478000000	0.881826	0.854518	0.87384	1.0636	1.15505	1.06281	0.0021172	0.795435
E2RA48;J9P4I7	E2RA48;J9P4I7	tr|E2RA48|E2RA48_CANLF Poly(U) binding splicing factor 60 OS=Canis lupus familiaris GN=PUF60 PE=4 SV=2;tr|J9P4I7|J9P4I7_CANLF Poly(U) binding splicing factor 60 OS=Canis lupus familiaris GN=PUF60 PE=4 SV=1	2	18	18	18	39.4	58.226	543	83.261	5123300000	0.839534	0.880466	0.793391	1.0703	1.03002	1.04316	0.00164648	0.799558
E2RA50;J9P8J3	E2RA50;J9P8J3	tr|E2RA50|E2RA50_CANLF Uncharacterized protein OS=Canis lupus familiaris PE=4 SV=2;tr|J9P8J3|J9P8J3_CANLF Uncharacterized protein OS=Canis lupus familiaris PE=4 SV=1	2	19	19	5	54.7	48.372	439	249.12	73660000000	0.850995	0.907156	0.872539	1.06326	1.14947	1.04649	0.004275	0.807153
E2RB90	E2RB90	tr|E2RB90|E2RB90_CANLF Heterogeneous nuclear ribonucleoprotein F OS=Canis lupus familiaris GN=HNRNPF PE=4 SV=1	1	14	12	12	50	45.634	414	121.49	28816000000	0.783989	0.807265	0.875971	1.07554	1.15026	1.16379	0.00138996	0.727881
E2RB98	E2RB98	tr|E2RB98|E2RB98_CANLF Cytochrome P450 family 51 subfamily A member 1 OS=Canis lupus familiaris GN=CYP51A1 PE=3 SV=2	1	11	11	11	24.4	57.258	508	31.339	3617500000	0.82973	0.852994	0.965817	1.05727	1.04547	1.18956	0.026383	0.804468
E2RBF2	E2RBF2	tr|E2RBF2|E2RBF2_CANLF Pumilio RNA binding family member 3 OS=Canis lupus familiaris GN=PUM3 PE=4 SV=2	1	9	9	9	13.9	73.568	648	18.6	1509400000	0.823858	0.752652	0.929193	1.00446	1.13265	1.28465	0.0333531	0.732284
E2RBT1	E2RBT1	tr|E2RBT1|E2RBT1_CANLF Mitochondrial ribosomal protein L11 OS=Canis lupus familiaris GN=MRPL11 PE=3 SV=1	1	8	8	8	44.3	20.653	192	35.519	778960000	0.969004	0.905626	0.879951	1.00708	1.138	1.2006	0.0350249	0.823323
E2RBV0	E2RBV0	tr|E2RBV0|E2RBV0_CANLF WD repeat domain 61 OS=Canis lupus familiaris GN=WDR61 PE=4 SV=1	1	6	6	6	23.3	33.515	305	23.036	899690000	0.918495	0.854709	0.961553	1.1202	1.13961	1.09957	0.00326999	0.814066
E2RBV8	E2RBV8	tr|E2RBV8|E2RBV8_CANLF Heterogeneous nuclear ribonucleoprotein A0 OS=Canis lupus familiaris GN=HNRNPA0 PE=4 SV=1	1	10	10	10	37.4	31.069	310	166.27	10420000000	0.835314	0.708194	0.696246	1.0597	1.07116	1.23955	0.00675323	0.664535
E2RCI5	E2RCI5	tr|E2RCI5|E2RCI5_CANLF Ski2 like RNA helicase 2 OS=Canis lupus familiaris GN=SKIV2L2 PE=4 SV=2	1	14	14	14	17.6	117.81	1042	122.3	3678800000	0.950029	0.833379	0.845724	1.10055	1.11847	1.23811	0.00831574	0.760497
E2RCN2	E2RCN2	tr|E2RCN2|E2RCN2_CANLF Vaccinia related kinase 1 OS=Canis lupus familiaris GN=VRK1 PE=3 SV=2	1	5	5	5	14.7	45.142	395	24.349	663790000	0.886342	0.996256	0.831662	1.11508	1.09036	1.18204	0.0156636	0.801264
E2RD37	E2RD37	tr|E2RD37|E2RD37_CANLF Transformer 2 beta homolog OS=Canis lupus familiaris GN=TRA2B PE=4 SV=2	1	4	4	4	18.4	33.621	288	15.168	1568600000	0.847767	0.741493	0.814777	1.01105	1.13352	1.0617	0.00486757	0.749792
E2RDL8	E2RDL8	tr|E2RDL8|E2RDL8_CANLF Splicing factor 3a subunit 1 OS=Canis lupus familiaris GN=SF3A1 PE=4 SV=1	1	18	18	18	30.9	88.781	793	93.998	5744700000	0.947065	0.875237	0.934196	1.06102	1.11499	1.17528	0.00753851	0.822518
E2RE36	E2RE36	tr|E2RE36|E2RE36_CANLF Heterogeneous nuclear ribonucleoprotein R OS=Canis lupus familiaris GN=HNRNPR PE=4 SV=2	1	26	26	20	40.1	70.942	633	126.09	31767000000	0.857319	0.814419	0.80842	1.04622	1.09594	1.1941	0.00346039	0.743393
E2REX8	E2REX8	tr|E2REX8|E2REX8_CANLF DNA-directed RNA polymerase subunit beta OS=Canis lupus familiaris GN=POLR1B PE=3 SV=2	1	6	6	6	5.6	128.53	1135	14.111	303280000	0.796224	0.78275	0.840148	1.02184	1.09268	1.17866	0.00387687	0.734586
E2RFB4	E2RFB4	tr|E2RFB4|E2RFB4_CANLF Protein phosphatase, Mg2+/Mn2+ dependent 1G OS=Canis lupus familiaris GN=PPM1G PE=3 SV=2	1	10	10	10	26.3	58.933	544	56.957	2409200000	0.931187	1.01872	0.971252	1.20453	1.09299	1.22784	0.0144292	0.828614
E2RFM0	E2RFM0	tr|E2RFM0|E2RFM0_CANLF WD repeat domain 75 OS=Canis lupus familiaris GN=WDR75 PE=4 SV=2	1	7	7	7	9.9	94.518	829	22.591	564120000	0.813199	0.817662	0.777813	1.01809	1.12063	1.10887	0.00129651	0.74168
E2RG27;E2RG59	E2RG27;E2RG59	tr|E2RG27|E2RG27_CANLF Kinectin 1 OS=Canis lupus familiaris GN=KTN1 PE=4 SV=2;tr|E2RG59|E2RG59_CANLF Kinectin 1 OS=Canis lupus familiaris GN=KTN1 PE=4 SV=2	2	54	54	54	43.8	156.56	1357	323.31	24540000000	0.814904	0.830367	0.805128	1.03314	1.05404	1.06727	4.52577e-05	0.776806
E2RGF9	E2RGF9	tr|E2RGF9|E2RGF9_CANLF Nucleolar protein 7 OS=Canis lupus familiaris GN=NOL7 PE=4 SV=2	1	4	4	4	13	29.849	262	7.32	457460000	0.846602	0.851745	0.871428	1.23916	1.45185	1.47741	0.00216749	0.616486
J9P520;E2RGR3;J9NSA5;E2RAV5	J9P520;E2RGR3	tr|J9P520|J9P520_CANLF Stromal antigen 2 OS=Canis lupus familiaris GN=STAG2 PE=4 SV=1;tr|E2RGR3|E2RGR3_CANLF Stromal antigen 2 OS=Canis lupus familiaris GN=STAG2 PE=4 SV=2	4	7	7	5	5	141.29	1231	10.62	328520000	0.85311	0.712342	0.925146	1.11364	1.2582	1.34353	0.0112228	0.670349
J9PA71;E2RHH8;J9NRF8;J9NZF8;J9P8U0;J9NYI7;J9NUR6;E2QY34;J9P617;J9P8F6;J9P495;E2R5J4;E2QY61;J9P114;J9P648;E2R4C2;J9NSG3;F1PAE2;J9JHW9;J9P7S5;J9P2V4;J9NWM5;J9P6C6;J9JHD7;E2RIT4	J9PA71;E2RHH8;J9NRF8;J9NZF8;J9P8U0;J9NYI7;J9NUR6;E2QY34;J9P617;J9P8F6;J9P495;E2R5J4;E2QY61;J9P114;J9P648	tr|J9PA71|J9PA71_CANLF ATP synthase subunit d, mitochondrial OS=Canis lupus familiaris GN=LOC102154055 PE=3 SV=1;tr|E2RHH8|E2RHH8_CANLF ATP synthase subunit d, mitochondrial OS=Canis lupus familiaris PE=3 SV=1;tr|J9NRF8|J9NRF8_CANLF ATP synthase subunit d,	25	7	7	3	47.2	18.697	161	19.439	9223500000	0.738937	0.722445	0.979929	1.05906	1.06005	1.14355	0.0355853	0.748256
E2RHZ0	E2RHZ0	tr|E2RHZ0|E2RHZ0_CANLF Condensin complex subunit 1 OS=Canis lupus familiaris GN=NCAPD2 PE=3 SV=2	1	9	9	9	7.4	157.34	1400	36.358	566600000	0.989191	0.878816	0.901292	1.07517	1.07844	1.21085	0.0239003	0.823104
E2RIX2	E2RIX2	tr|E2RIX2|E2RIX2_CANLF Heterogeneous nuclear ribonucleoprotein D OS=Canis lupus familiaris GN=HNRNPD PE=4 SV=2	1	9	9	9	24.5	38.388	355	30.81	27600000000	0.76206	0.837145	0.897303	1.0703	1.09881	1.27818	0.0139791	0.724194
E2RJ93	E2RJ93	tr|E2RJ93|E2RJ93_CANLF Glutaminase OS=Canis lupus familiaris GN=GLS PE=3 SV=2	1	12	12	11	18	83.021	754	33.378	5170700000	0.825755	0.864293	0.81976	1.05821	1.25347	1.20088	0.00508003	0.714522
E2RJH5;F1P8D4	E2RJH5	tr|E2RJH5|E2RJH5_CANLF Heterogeneous nuclear ribonucleoprotein H2 OS=Canis lupus familiaris GN=HNRNPH2 PE=4 SV=2	2	12	4	4	36.7	49.279	449	37.812	944210000	0.794679	0.851495	0.950556	1.09374	1.04132	1.06996	0.013432	0.810207
E2RJX3	E2RJX3	tr|E2RJX3|E2RJX3_CANLF Marker of proliferation Ki-67 OS=Canis lupus familiaris GN=MKI67 PE=4 SV=2	1	25	25	25	14.5	270.64	2438	66.867	1236400000	0.891957	0.957756	0.796799	1.09457	1.09566	1.23233	0.0167295	0.773255
E2RKA8;J9NZA6;E2R4E5;J9PAU6;J9NTK5;J9NRY1;J9P4R5;E2R456;J9NUW6;J9NZ81;J9P3D5	E2RKA8;J9NZA6;E2R4E5;J9PAU6;J9NTK5;J9NRY1;J9P4R5	sp|E2RKA8|RL32_CANLF 60S ribosomal protein L32 OS=Canis lupus familiaris GN=RPL32 PE=1 SV=1;tr|J9NZA6|J9NZA6_CANLF Uncharacterized protein OS=Canis lupus familiaris PE=4 SV=1;tr|E2R4E5|E2R4E5_CANLF Uncharacterized protein OS=Canis lupus familiaris PE=4 SV=	11	8	8	8	51.1	15.86	135	23.179	21235000000	0.916744	0.785583	0.965755	1.05075	1.24299	1.15291	0.0283819	0.774108
E2RKF9;J9P6R4	E2RKF9;J9P6R4	tr|E2RKF9|E2RKF9_CANLF A-kinase anchoring protein 1 OS=Canis lupus familiaris GN=AKAP1 PE=4 SV=2;tr|J9P6R4|J9P6R4_CANLF A-kinase anchoring protein 1 OS=Canis lupus familiaris GN=AKAP1 PE=4 SV=1	2	2	2	2	3.5	92.683	864	14.733	105220000	0.909852	0.965186	0.937865	1.4162	1.17111	1.40132	0.00838263	0.705232
E2RKQ6	E2RKQ6	tr|E2RKQ6|E2RKQ6_CANLF Galectin 3 binding protein OS=Canis lupus familiaris GN=LGALS3BP PE=4 SV=1	1	7	7	7	13.4	62.21	559	26.986	3761700000	0.817493	0.937831	0.79961	1.15545	1.08381	1.18124	0.00526283	0.746949
E2RL03	E2RL03	tr|E2RL03|E2RL03_CANLF ATP synthase-coupling factor 6, mitochondrial OS=Canis lupus familiaris GN=ATP5J PE=3 SV=2	1	4	4	4	40.9	12.858	110	15.137	5429400000	0.817805	0.87147	0.821717	1.06425	1.04111	1.07586	0.000370364	0.789318
J9NYN4;E2RL53	J9NYN4;E2RL53	tr|J9NYN4|J9NYN4_CANLF Trans-golgi network protein 2 OS=Canis lupus familiaris GN=TGOLN2 PE=4 SV=1;tr|E2RL53|E2RL53_CANLF Trans-golgi network protein 2 OS=Canis lupus familiaris GN=TGOLN2 PE=4 SV=2	2	2	2	2	5	45.092	417	5.3671	119580000	0.807052	0.858019	0.920445	1.05133	1.07577	1.20502	0.0126398	0.775937
E2RL65	E2RL65	tr|E2RL65|E2RL65_CANLF Splicing factor 3b subunit 2 OS=Canis lupus familiaris GN=SF3B2 PE=4 SV=2	1	21	21	21	29.1	100.24	895	89.732	6193900000	0.816677	0.867474	0.854358	1.06124	1.06638	1.16875	0.00270499	0.770095
F1PLN7;E2RL92	F1PLN7;E2RL92	tr|F1PLN7|F1PLN7_CANLF Uncharacterized protein OS=Canis lupus familiaris GN=MATR3 PE=4 SV=2;tr|E2RL92|E2RL92_CANLF Uncharacterized protein OS=Canis lupus familiaris GN=MATR3 PE=4 SV=2	2	23	23	23	32.9	94.694	849	155.7	11159000000	0.85305	0.818543	0.85908	1.02418	1.06329	0.965004	0.00509467	0.829056
E2RLN2;J9JHY9;J9NV51;J9P3D7	E2RLN2;J9JHY9;J9NV51;J9P3D7	tr|E2RLN2|E2RLN2_CANLF Nucleoporin 153 OS=Canis lupus familiaris GN=NUP153 PE=4 SV=2;tr|J9JHY9|J9JHY9_CANLF Nucleoporin 153 OS=Canis lupus familiaris GN=NUP153 PE=4 SV=1;tr|J9NV51|J9NV51_CANLF Nucleoporin 153 OS=Canis lupus familiaris GN=NUP153 PE=4 SV=1;t	4	9	9	9	8.1	153.87	1478	22.368	405960000	0.94045	0.962095	0.99743	1.09896	1.22035	1.21533	0.00792433	0.820445
E2RLP4	E2RLP4	tr|E2RLP4|E2RLP4_CANLF Cell division cycle 5 like OS=Canis lupus familiaris GN=CDC5L PE=4 SV=1	1	12	12	12	19.6	92.271	802	89.824	1685100000	0.887086	0.879291	0.729168	1.1019	1.05444	1.087	0.00945018	0.769438
E2RLQ4;J9NYT3;E2QWT4	E2RLQ4;J9NYT3	tr|E2RLQ4|E2RLQ4_CANLF Uncharacterized protein OS=Canis lupus familiaris PE=4 SV=2;tr|J9NYT3|J9NYT3_CANLF Uncharacterized protein OS=Canis lupus familiaris GN=LOC474964 PE=4 SV=1	3	19	19	5	59.3	37.041	334	159.13	45659000000	0.848081	0.747309	0.810781	1.01736	1.07539	0.99161	0.00418594	0.78012
F1PKT5;E2RMJ6	F1PKT5;E2RMJ6	tr|F1PKT5|F1PKT5_CANLF Nucleoporin 58 OS=Canis lupus familiaris GN=NUP58 PE=4 SV=2;tr|E2RMJ6|E2RMJ6_CANLF Nucleoporin 58 OS=Canis lupus familiaris GN=NUP58 PE=4 SV=2	2	1	1	1	2.9	59.613	587	4.6465	453480000	0.901015	0.849219	0.921591	1.07448	1.07678	1.21426	0.0105343	0.793883
E2RML8	E2RML8	tr|E2RML8|E2RML8_CANLF Metaxin 2 OS=Canis lupus familiaris GN=MTX2 PE=4 SV=2	1	5	5	5	15.4	30.109	267	9.4441	14129000000	0.819742	0.806425	0.784616	1.05634	1.06725	1.00686	0.000348717	0.770108
E2RMR3	E2RMR3	tr|E2RMR3|E2RMR3_CANLF Heterogeneous nuclear ribonucleoprotein M OS=Canis lupus familiaris GN=HNRNPM PE=4 SV=2	1	30	30	30	48	78.92	743	211.3	36401000000	0.855271	0.808681	0.898425	1.06003	1.08341	1.08809	0.00122663	0.79293
E2RN03	E2RN03	tr|E2RN03|E2RN03_CANLF DEAD-box helicase 47 OS=Canis lupus familiaris GN=DDX47 PE=3 SV=2	1	5	5	5	13.1	53.53	482	11.734	316420000	0.753561	0.698996	0.836523	1.14022	1.13594	1.09343	0.00107997	0.679334
E2RN38	E2RN38	tr|E2RN38|E2RN38_CANLF Calumenin OS=Canis lupus familiaris GN=CALU PE=4 SV=1	1	15	15	15	56.5	37.077	315	110.01	14550000000	0.67888	0.712713	0.735349	1.09664	1.16718	1.28879	0.00124611	0.598698
E2RNG4;J9P8T8	E2RNG4;J9P8T8	tr|E2RNG4|E2RNG4_CANLF Desmoplakin OS=Canis lupus familiaris GN=DSP PE=4 SV=2;tr|J9P8T8|J9P8T8_CANLF Desmoplakin OS=Canis lupus familiaris GN=DSP PE=4 SV=1	2	100	100	100	35.4	332.22	2878	323.31	38965000000	0.835253	0.85356	0.762088	1.06806	1.11692	1.06495	0.00122495	0.75414
J9P6S8;H9GWB1;J9NS47;E2RNW2;L7N0M5;L7N0M4;J9NX76;E2RNW3;J9P2Y4;L7N0M7;J9NTD9;L7N0C3;E2RH15	J9P6S8;H9GWB1;J9NS47;E2RNW2;L7N0M5;L7N0M4;J9NX76;E2RNW3;J9P2Y4;L7N0M7;J9NTD9;L7N0C3	tr|J9P6S8|J9P6S8_CANLF Histone H2B OS=Canis lupus familiaris GN=LOC488303 PE=3 SV=1;tr|H9GWB1|H9GWB1_CANLF Histone H2B OS=Canis lupus familiaris GN=LOC106558265 PE=3 SV=1;tr|J9NS47|J9NS47_CANLF Histone H2B OS=Canis lupus familiaris GN=LOC106558265 PE=3 SV=	13	8	2	2	53.2	13.89	126	6.2532	64846000000	0.745673	0.451414	0.662485	1.19961	1.03318	1.16625	0.00714295	0.547089
E2RNW5	E2RNW5	tr|E2RNW5|E2RNW5_CANLF Endoplasmic reticulum oxidoreductase 1 alpha OS=Canis lupus familiaris GN=ERO1A PE=4 SV=1	1	11	11	11	28.2	54.361	468	109.69	6855500000	0.822865	0.714035	0.865191	1.02249	1.07926	1.27347	0.0213431	0.711686
J9JHA9;E2RNY1	J9JHA9;E2RNY1	tr|J9JHA9|J9JHA9_CANLF Heterogeneous nuclear ribonucleoprotein U like 1 OS=Canis lupus familiaris GN=HNRNPUL1 PE=4 SV=1;tr|E2RNY1|E2RNY1_CANLF Heterogeneous nuclear ribonucleoprotein U like 1 OS=Canis lupus familiaris GN=HNRNPUL1 PE=4 SV=1	2	6	6	6	9.9	84.805	756	21.708	1205500000	0.852205	0.79889	0.816968	1.05669	1.05105	0.998097	0.00094936	0.794655
E2RP20	E2RP20	tr|E2RP20|E2RP20_CANLF Perilipin OS=Canis lupus familiaris GN=PLIN2 PE=3 SV=2	1	11	11	10	30.2	48.963	447	46.05	2196600000	0.79024	0.781611	0.72931	1.08582	1.13698	1.29854	0.0036929	0.65349
E2RPH3	E2RPH3	tr|E2RPH3|E2RPH3_CANLF Calcineurin like EF-hand protein 1 OS=Canis lupus familiaris GN=CHP1 PE=4 SV=1	1	2	2	2	9.7	22.442	195	5.5786	351170000	0.847432	0.884615	0.789908	1.07656	0.998791	1.01725	0.00626793	0.81548
E2RPQ7	E2RPQ7	tr|E2RPQ7|E2RPQ7_CANLF Uncharacterized protein OS=Canis lupus familiaris PE=4 SV=2	1	7	7	7	15.4	57.471	514	29.863	1450400000	0.852921	0.807712	0.852494	1.01673	1.04729	1.04391	0.000373584	0.808616
J9P8R0;E2RQ80	J9P8R0;E2RQ80	tr|J9P8R0|J9P8R0_CANLF Small nuclear ribonucleoprotein D3 polypeptide OS=Canis lupus familiaris GN=SNRPD3 PE=4 SV=1;tr|E2RQ80|E2RQ80_CANLF Uncharacterized protein OS=Canis lupus familiaris GN=SNRPD3 PE=4 SV=1	2	4	4	4	37.3	13.944	126	22.442	6907800000	0.846777	0.886039	0.90117	1.00699	1.01933	1.16602	0.0255089	0.825093
E2RQG4	E2RQG4	tr|E2RQG4|E2RQG4_CANLF Dihydrolipoamide acetyltransferase component of pyruvate dehydrogenase complex OS=Canis lupus familiaris GN=DBT PE=3 SV=1	1	5	5	5	10.8	53.29	482	11.374	1814800000	0.842154	0.848532	0.886899	1.02739	1.09533	1.28111	0.0233354	0.757259
E2RQR0	E2RQR0	tr|E2RQR0|E2RQR0_CANLF Uncharacterized protein OS=Canis lupus familiaris PE=4 SV=2	1	7	7	7	41.2	23.454	211	29.254	1111600000	0.70897	0.795262	0.740063	1.13096	1.0272	1.27016	0.00617663	0.654634
E2RR33	E2RR33	tr|E2RR33|E2RR33_CANLF Splicing factor 3b subunit 3 OS=Canis lupus familiaris GN=SF3B3 PE=4 SV=2	1	23	23	23	24.4	135.56	1217	104.29	5054000000	0.903237	0.852215	0.864993	1.00068	1.03727	1.17613	0.0236026	0.815302
E2RR45	E2RR45	tr|E2RR45|E2RR45_CANLF Down-regulator of transcription 1 OS=Canis lupus familiaris GN=DR1 PE=4 SV=1	1	2	2	2	15.3	19.457	176	10.108	191110000	0.812212	0.93821	0.887064	1.20705	1.34781	1.21061	0.00311767	0.700441
E2RRA3	E2RRA3	tr|E2RRA3|E2RRA3_CANLF Splicing factor 3b subunit 6 OS=Canis lupus familiaris GN=SF3B6 PE=4 SV=1	1	5	5	5	45.6	14.585	125	13.886	2100300000	0.880696	0.797265	0.832741	1.06486	1.03584	1.18703	0.00772256	0.763657
E2RSR1	E2RSR1	tr|E2RSR1|E2RSR1_CANLF Serine palmitoyltransferase long chain base subunit 2 OS=Canis lupus familiaris GN=SPTLC2 PE=3 SV=2	1	13	13	11	27.2	62.721	562	68.301	2970700000	0.852341	0.778556	0.795674	1.00445	1.13286	1.23791	0.0112651	0.718938
E2RTB1;E2R4V7;E2REX9;J9P4U0;E2RM89;E2RAD1	E2RTB1;E2R4V7;E2REX9	tr|E2RTB1|E2RTB1_CANLF Uncharacterized protein OS=Canis lupus familiaris GN=NPM1 PE=4 SV=2;tr|E2R4V7|E2R4V7_CANLF Uncharacterized protein OS=Canis lupus familiaris PE=4 SV=2;tr|E2REX9|E2REX9_CANLF Uncharacterized protein OS=Canis lupus familiaris PE=4 SV=2	6	14	14	12	52.4	32.619	294	241.46	201000000000	0.815309	0.753835	0.811077	1.12361	1.18963	1.1283	0.000261792	0.691615
F1P6U8	F1P6U8	tr|F1P6U8|F1P6U8_CANLF Serine and arginine rich splicing factor 11 OS=Canis lupus familiaris GN=SRSF11 PE=4 SV=2	1	4	4	4	12.4	53.277	477	33.544	1724400000	0.808887	0.87242	0.798392	1.05738	1.08679	0.922852	0.0242998	0.808504
F1P6W6;J9P5S2	F1P6W6;J9P5S2	tr|F1P6W6|F1P6W6_CANLF Acyl-CoA dehydrogenase, C-4 to C-12 straight chain OS=Canis lupus familiaris GN=ACADM PE=3 SV=2;tr|J9P5S2|J9P5S2_CANLF Acyl-CoA dehydrogenase, C-4 to C-12 straight chain OS=Canis lupus familiaris GN=ACADM PE=3 SV=1	2	7	7	7	18.1	46.701	421	16.539	1112900000	0.828758	0.913644	0.909672	1.03758	1.08855	1.17124	0.0107967	0.804299
F1P7J0;E2RIS4;F1Q1U4	F1P7J0	tr|F1P7J0|F1P7J0_CANLF Uncharacterized protein OS=Canis lupus familiaris GN=SFPQ PE=4 SV=2	3	27	27	26	46.9	70.793	659	192.91	49033000000	0.877136	0.835227	0.835521	0.968137	1.06487	1.14758	0.0171295	0.801076
F1P7R7	F1P7R7	tr|F1P7R7|F1P7R7_CANLF WD repeat domain 43 OS=Canis lupus familiaris GN=WDR43 PE=4 SV=2	1	12	12	12	17.2	75.78	681	22.521	1591300000	0.801841	0.666241	0.848778	1.0775	1.20914	1.18484	0.00481609	0.667398
F1P8K0;J9P2V3	F1P8K0;J9P2V3	tr|F1P8K0|F1P8K0_CANLF Extended synaptotagmin 2 OS=Canis lupus familiaris GN=ESYT2 PE=4 SV=2;tr|J9P2V3|J9P2V3_CANLF Extended synaptotagmin 2 OS=Canis lupus familiaris GN=ESYT2 PE=4 SV=1	2	11	11	11	15.8	94.303	843	34.804	983680000	0.877837	0.826318	0.845125	0.992337	1.06248	1.0376	0.00206555	0.824365
F1P8U8	F1P8U8	tr|F1P8U8|F1P8U8_CANLF DNA helicase OS=Canis lupus familiaris GN=MCM5 PE=3 SV=2	1	14	14	14	25.6	73.576	661	44.794	2782600000	0.991169	0.914735	0.853016	1.10112	1.09375	1.1307	0.0104243	0.829607
F1P9G4	F1P9G4	tr|F1P9G4|F1P9G4_CANLF DEK proto-oncogene OS=Canis lupus familiaris GN=DEK PE=4 SV=2	1	7	7	7	19.2	43.34	381	32.76	1845800000	0.976789	0.891569	1.08302	1.16969	1.19384	1.21324	0.0213813	0.825154
F1P9Q3	F1P9Q3	tr|F1P9Q3|F1P9Q3_CANLF Transmembrane BAX inhibitor motif containing 1 OS=Canis lupus familiaris GN=TMBIM1 PE=3 SV=2	1	1	1	1	5.3	29.702	266	23.769	452080000	0.847843	0.872267	0.808313	0.956933	1.11748	1.23466	0.0345365	0.764089
F1P9W2;J9P766	F1P9W2;J9P766	tr|F1P9W2|F1P9W2_CANLF Calponin OS=Canis lupus familiaris GN=CNN3 PE=3 SV=1;tr|J9P766|J9P766_CANLF Calponin OS=Canis lupus familiaris GN=CNN3 PE=3 SV=1	2	3	3	3	10.9	34.368	311	12.799	1000100000	0.934456	0.899069	0.949703	1.28604	1.32268	1.17595	0.00200582	0.735397
F1PA19	F1PA19	tr|F1PA19|F1PA19_CANLF Heterogeneous nuclear ribonucleoprotein A/B OS=Canis lupus familiaris GN=HNRNPAB PE=4 SV=2	1	5	5	5	22.7	29.749	264	24.675	15269000000	0.85013	0.79458	0.82001	0.986698	1.06199	1.07902	0.00246977	0.788026
F1PA65	F1PA65	tr|F1PA65|F1PA65_CANLF RAN binding protein 9 OS=Canis lupus familiaris GN=RANBP9 PE=4 SV=2	1	2	2	2	4.8	54.995	499	4.819	65022000	1.04303	0.912791	0.901222	1.16625	1.12652	1.153	0.0139102	0.829146
F1PAA9;F1PAA4;Q95LE0	F1PAA9;F1PAA4	sp|F1PAA9|CADH1_CANLF Cadherin-1 OS=Canis lupus familiaris GN=CDH1 PE=1 SV=2;tr|F1PAA4|F1PAA4_CANLF Cadherin-1 OS=Canis lupus familiaris GN=CDH1 PE=4 SV=2	3	15	15	15	19.3	97.754	885	122.13	4985300000	0.857121	0.962481	0.938603	1.11801	1.04038	1.26318	0.0382937	0.806123
F1PAH7	F1PAH7	tr|F1PAH7|F1PAH7_CANLF Eukaryotic translation initiation factor 4 gamma 2 OS=Canis lupus familiaris GN=EIF4G2 PE=4 SV=2	1	21	21	21	23	105.4	936	83.444	3827900000	0.864066	0.85671	0.875497	1.07534	1.0786	1.20041	0.0036847	0.774004
F1PBF9;J9P5M9	F1PBF9;J9P5M9	tr|F1PBF9|F1PBF9_CANLF Ubiquitin protein ligase E3 component n-recognin 5 OS=Canis lupus familiaris GN=UBR5 PE=4 SV=2;tr|J9P5M9|J9P5M9_CANLF Ubiquitin protein ligase E3 component n-recognin 5 OS=Canis lupus familiaris GN=UBR5 PE=4 SV=1	2	9	9	9	3.4	309.25	2798	19.362	189000000	0.872216	0.903661	0.796835	1.08442	1.15548	1.29762	0.0101919	0.727265
F1PBJ3;J9NSW5;Q95L29;REV__E2RLN8;REV__J9NRU5	F1PBJ3;J9NSW5	tr|F1PBJ3|F1PBJ3_CANLF Uncharacterized protein OS=Canis lupus familiaris GN=LMNA PE=3 SV=1;tr|J9NSW5|J9NSW5_CANLF Uncharacterized protein OS=Canis lupus familiaris GN=LMNA PE=3 SV=1	5	47	47	46	71.9	74.225	665	323.31	237000000000	0.778562	0.825554	0.775693	1.02063	1.09944	1.00513	0.00173874	0.76149
F1PBJ4	F1PBJ4	tr|F1PBJ4|F1PBJ4_CANLF FUS RNA binding protein OS=Canis lupus familiaris GN=FUS PE=4 SV=2	1	8	8	6	16.2	52.641	517	22.875	12470000000	0.880394	0.784028	0.950041	1.05687	1.07975	1.18225	0.018978	0.787757
F1PBZ5	F1PBZ5	tr|F1PBZ5|F1PBZ5_CANLF Uncharacterized protein OS=Canis lupus familiaris PE=3 SV=1	1	1	1	1	1.9	52.95	480	2.0905	515930000	0.833618	0.901697	0.735645	1.08328	1.17178	1.49519	0.0335686	0.658877
F1PCI2;J9PB23;J9NTG7	F1PCI2;J9PB23;J9NTG7	tr|F1PCI2|F1PCI2_CANLF CD55 molecule (Cromer blood group) OS=Canis lupus familiaris GN=CD55 PE=4 SV=2;tr|J9PB23|J9PB23_CANLF CD55 molecule (Cromer blood group) OS=Canis lupus familiaris GN=CD55 PE=4 SV=1;tr|J9NTG7|J9NTG7_CANLF CD55 molecule (Cromer blood g	3	3	3	3	9.8	37.102	337	8.1959	229320000	0.919501	0.697165	0.828136	1.1618	1.27664	1.25692	0.00479652	0.661587
F1PCQ3	F1PCQ3	tr|F1PCQ3|F1PCQ3_CANLF Solute carrier family 16 member 1 OS=Canis lupus familiaris GN=SLC16A1 PE=4 SV=1	1	6	6	6	11.2	53.747	498	31.47	1167100000	0.975615	0.886943	0.936866	1.14077	1.10964	1.36322	0.0317955	0.774685
F1PDV9	F1PDV9	tr|F1PDV9|F1PDV9_CANLF Ribosome biogenesis protein BOP1 OS=Canis lupus familiaris GN=BOP1 PE=3 SV=2	1	9	9	2	12.2	79.552	713	23.128	478150000	0.982124	0.941071	0.907517	1.14465	1.21465	1.15375	0.00179124	0.80577
F1PEA6;O77703	F1PEA6	tr|F1PEA6|F1PEA6_CANLF Uncharacterized protein OS=Canis lupus familiaris GN=DDX5 PE=3 SV=2	2	26	18	18	42.9	75.621	671	178.27	39326000000	0.867559	0.799217	0.853029	1.00822	1.08107	1.1733	0.0089492	0.772331
O77704;J9P6A9;F1PEF1	O77704;J9P6A9;F1PEF1	tr|O77704|O77704_CANLF Desmocollin type 2 (Fragment) OS=Canis lupus familiaris GN=DSC2 PE=2 SV=1;tr|J9P6A9|J9P6A9_CANLF Desmocollin 2 OS=Canis lupus familiaris GN=DSC2 PE=4 SV=1;tr|F1PEF1|F1PEF1_CANLF Desmocollin 2 OS=Canis lupus familiaris GN=DSC2 PE=4 SV	3	5	5	4	8.5	91.081	814	15.939	519110000	0.976612	0.779592	0.941579	1.11413	1.22886	1.07891	0.0332732	0.788387
J9P625;F1PEJ0	J9P625;F1PEJ0	tr|J9P625|J9P625_CANLF Stearoyl-CoA desaturase OS=Canis lupus familiaris GN=SCD PE=3 SV=1;tr|F1PEJ0|F1PEJ0_CANLF Stearoyl-CoA desaturase OS=Canis lupus familiaris GN=SCD PE=3 SV=2	2	3	3	3	10	41.513	360	53.08	3128100000	0.748362	0.707636	0.758435	1.03612	1.24516	1.1756	0.00283603	0.640588
Q9GLD3;F1PEN6	Q9GLD3;F1PEN6	sp|Q9GLD3|TFR1_CANLF Transferrin receptor protein 1 OS=Canis lupus familiaris GN=TFRC PE=1 SV=1;tr|F1PEN6|F1PEN6_CANLF Transferrin receptor protein 1 OS=Canis lupus familiaris GN=TFRC PE=2 SV=1	2	19	19	19	24.7	86.648	770	74.748	9592600000	0.833535	0.755386	0.843346	1.13595	1.08912	1.20748	0.00166231	0.708588
F1PF26;F6XHK1;J9P063;F6UMJ5	F1PF26;F6XHK1;J9P063;F6UMJ5	tr|F1PF26|F1PF26_CANLF Uncharacterized protein OS=Canis lupus familiaris PE=4 SV=1;tr|F6XHK1|F6XHK1_CANLF Uncharacterized protein OS=Canis lupus familiaris GN=MRPL45 PE=4 SV=1;tr|J9P063|J9P063_CANLF Uncharacterized protein OS=Canis lupus familiaris PE=4 SV	4	3	3	3	10.1	33.367	287	5.473	393320000	0.835393	0.923612	0.815899	1.08097	1.05982	1.14753	0.0049583	0.783047
F1PF87	F1PF87	tr|F1PF87|F1PF87_CANLF Gasdermin D OS=Canis lupus familiaris GN=GSDMD PE=4 SV=2	1	3	3	3	6.4	52.003	468	5.421	238990000	0.936781	1.01566	0.855525	1.10664	1.11353	1.28411	0.0352547	0.801297
F1PFC6;J9NXJ9	F1PFC6	tr|F1PFC6|F1PFC6_CANLF Uncharacterized protein OS=Canis lupus familiaris PE=4 SV=2	2	5	4	4	36.7	19.244	177	48.655	2649500000	0.860602	0.842442	0.684768	1.14867	1.12084	0.910991	0.0475605	0.750764
J9P2B7;F1PFZ6;J9P6M9;J9P664;J9P0L5;J9NRH7;J9P0B2;L7N0D9;F1PFZ7;J9P5B1;J9JHP2;F1P790;F1P7D1;J9NZY9;E2QX34	J9P2B7;F1PFZ6;J9P6M9;J9P664;J9P0L5;J9NRH7;J9P0B2;L7N0D9;F1PFZ7;J9P5B1;J9JHP2;F1P790;F1P7D1;J9NZY9;E2QX34	tr|J9P2B7|J9P2B7_CANLF Histone H2A OS=Canis lupus familiaris GN=LOC611231 PE=3 SV=1;tr|F1PFZ6|F1PFZ6_CANLF Histone H2A OS=Canis lupus familiaris GN=LOC488254 PE=3 SV=2;tr|J9P6M9|J9P6M9_CANLF Histone H2A OS=Canis lupus familiaris GN=LOC488297 PE=3 SV=1;tr|J	15	6	6	3	43.8	13.906	128	29.364	191000000000	0.756633	0.749024	0.68498	1.05243	1.17617	0.938145	0.0108658	0.691763
F1PGB6	F1PGB6	tr|F1PGB6|F1PGB6_CANLF Interleukin enhancer binding factor 3 OS=Canis lupus familiaris GN=ILF3 PE=4 SV=2	1	27	27	24	43	95.555	896	207.85	20072000000	0.881916	0.820107	0.828438	0.991652	1.10011	1.06943	0.00503967	0.800475
F1PGL5	F1PGL5	tr|F1PGL5|F1PGL5_CANLF Carboxypeptidase M OS=Canis lupus familiaris GN=CPM PE=4 SV=2	1	2	2	2	5.4	41.429	368	4.5668	859750000	0.813751	0.907488	0.993052	1.16876	1.06644	1.2177	0.0226764	0.786089
F1PGP3	F1PGP3	tr|F1PGP3|F1PGP3_CANLF Family with sequence similarity 3 member C OS=Canis lupus familiaris GN=FAM3C PE=4 SV=2	1	5	5	5	26.9	24.738	227	14.445	477900000	0.876275	0.84533	0.795134	1.05565	0.971973	1.10042	0.0101524	0.804572
F1PGX2;F1PGX1	F1PGX2;F1PGX1	tr|F1PGX2|F1PGX2_CANLF Desmoglein 2 OS=Canis lupus familiaris GN=DSG2 PE=4 SV=2;tr|F1PGX1|F1PGX1_CANLF Desmoglein 2 OS=Canis lupus familiaris GN=DSG2 PE=4 SV=1	2	13	13	13	14.7	122.36	1119	30.617	1697100000	0.771084	0.726136	0.630817	1.16012	1.19281	1.09712	0.000913625	0.616814
F1PH18	F1PH18	tr|F1PH18|F1PH18_CANLF Glycine C-acetyltransferase OS=Canis lupus familiaris GN=GCAT PE=3 SV=2	1	4	4	4	11.4	46.268	430	11.043	480160000	0.830594	0.701271	0.695482	1.04784	1.03922	1.11842	0.00301571	0.694857
F1PHS5;J9NZV2	F1PHS5	tr|F1PHS5|F1PHS5_CANLF Plectin OS=Canis lupus familiaris GN=PLEC PE=4 SV=2	2	268	268	267	60.9	533.58	4691	323.31	943000000000	0.805696	0.807791	0.767916	1.01704	1.07927	1.0613	0.000330962	0.75418
F1PI93	F1PI93	tr|F1PI93|F1PI93_CANLF NOP14 nucleolar protein OS=Canis lupus familiaris GN=NOP14 PE=4 SV=2	1	6	6	6	7.6	97.655	857	15.094	724590000	0.947387	0.856814	0.900494	1.11204	1.06119	1.2053	0.0106212	0.800551
F1PK93	F1PK93	tr|F1PK93|F1PK93_CANLF Uncharacterized protein OS=Canis lupus familiaris PE=3 SV=2	1	5	5	5	10.2	57.903	508	20.225	1138400000	0.776124	0.824603	0.983936	1.07009	1.06402	1.28797	0.0448197	0.755292
F1PKF6	F1PKF6	tr|F1PKF6|F1PKF6_CANLF Splicing factor 3b subunit 1 OS=Canis lupus familiaris GN=SF3B1 PE=4 SV=2	1	30	30	30	27.6	145.83	1304	182.55	11807000000	0.848815	0.903067	0.83119	1.03847	0.980231	1.1324	0.0184776	0.819736
F1PKN2	F1PKN2	tr|F1PKN2|F1PKN2_CANLF BMS1, ribosome biogenesis factor OS=Canis lupus familiaris GN=BMS1 PE=4 SV=2	1	4	4	4	3.3	147.25	1287	8.9521	577700000	0.862872	0.897992	0.853245	1.08265	0.969035	1.21936	0.0409836	0.799166
F1PKR9;J9NUP0;J9P948;REV__E2QVC0	F1PKR9;J9NUP0;J9P948	tr|F1PKR9|F1PKR9_CANLF MYB binding protein 1a OS=Canis lupus familiaris GN=MYBBP1A PE=4 SV=2;tr|J9NUP0|J9NUP0_CANLF MYB binding protein 1a OS=Canis lupus familiaris GN=MYBBP1A PE=4 SV=1;tr|J9P948|J9P948_CANLF MYB binding protein 1a OS=Canis lupus familiari	4	34	34	34	28.8	140.76	1259	166.9	18118000000	0.903236	0.838728	0.774966	1.07093	1.12528	1.06477	0.00401692	0.771833
F1PKZ5	F1PKZ5	tr|F1PKZ5|F1PKZ5_CANLF Protein phosphatase 4 regulatory subunit 3A OS=Canis lupus familiaris GN=PPP4R3A PE=4 SV=2	1	5	5	1	5.8	95.35	833	9.3154	247080000	0.855621	0.846456	0.894799	1.09544	1.17011	1.29495	0.00589261	0.729358
F1PL92	F1PL92	tr|F1PL92|F1PL92_CANLF Aly/REF export factor OS=Canis lupus familiaris GN=ALYREF PE=4 SV=2	1	8	8	8	40.5	26.926	257	77.285	12754000000	0.903366	0.835792	0.822207	1.01698	1.14405	1.13574	0.00700321	0.776932
F1PLK8	F1PLK8	tr|F1PLK8|F1PLK8_CANLF Programmed cell death 11 OS=Canis lupus familiaris GN=PDCD11 PE=4 SV=2	1	19	19	19	11.2	208.82	1870	54.847	2203300000	0.838432	0.796508	0.767449	0.988321	1.09253	0.969325	0.00767719	0.787623
F1PLS4;Q5XFN2;F1PGH6;A3RLY4;E2R474;E2R4B0;E2R441;E2R461;E2RE99;E2R484;F6Y5W4;F6UNV5;F6UNP7;J9P010;F1PZZ3;Q8HZW3;J9P515;F1PNP2	F1PLS4	tr|F1PLS4|F1PLS4_CANLF Uncharacterized protein OS=Canis lupus familiaris GN=VIM PE=3 SV=1	18	41	41	36	83.9	53.597	466	323.31	1340000000000	0.812457	0.797978	0.695832	0.993299	1.03475	0.904809	0.0170127	0.786354
Q2TJA4;F1PLW6	Q2TJA4;F1PLW6	tr|Q2TJA4|Q2TJA4_CANLF 2-5 oligoadenylate synthetase 1 OS=Canis lupus familiaris GN=OAS1 PE=2 SV=1;tr|F1PLW6|F1PLW6_CANLF 2-5-oligoadenylate synthetase 1 OS=Canis lupus familiaris GN=OAS1 PE=4 SV=2	2	7	7	7	20.3	41.374	355	32.555	2068200000	0.797741	0.726212	0.782001	1.05773	1.1143	1.35218	0.0119062	0.654318
F1Q1M9;F1PM51	F1Q1M9;F1PM51	tr|F1Q1M9|F1Q1M9_CANLF Epithelial cell adhesion molecule OS=Canis lupus familiaris GN=EPCAM PE=4 SV=2;tr|F1PM51|F1PM51_CANLF Epithelial cell adhesion molecule OS=Canis lupus familiaris GN=EPCAM PE=4 SV=2	2	9	9	9	41.5	28.048	246	35.73	8734400000	0.82559	0.947123	0.92784	1.02751	1.10667	1.21608	0.0310522	0.806072
Q06SM5;F1PMU1;P79149;Q06SM4	Q06SM5;F1PMU1;P79149;Q06SM4	tr|Q06SM5|Q06SM5_CANLF Pinin 1 OS=Canis lupus familiaris PE=4 SV=1;tr|F1PMU1|F1PMU1_CANLF Pinin OS=Canis lupus familiaris GN=PNN PE=4 SV=1;sp|P79149|PININ_CANLF Pinin OS=Canis lupus familiaris GN=PNN PE=2 SV=3;tr|Q06SM4|Q06SM4_CANLF Pinin 2 OS=Canis lupus	4	12	12	12	15.4	87.426	767	86.605	2591900000	0.815709	0.880925	0.84129	1.03459	1.0084	1.18909	0.0176907	0.785228
F1PNT8	F1PNT8	tr|F1PNT8|F1PNT8_CANLF WD repeat domain 36 OS=Canis lupus familiaris GN=WDR36 PE=4 SV=2	1	9	9	9	12.9	98.912	891	31.014	1105600000	0.838001	0.989651	0.827065	1.06138	1.06912	1.1842	0.0287502	0.800894
F1PP08;J9P8B0	F1PP08	tr|F1PP08|F1PP08_CANLF Dipeptidyl peptidase 4 OS=Canis lupus familiaris GN=DPP4 PE=4 SV=2	2	12	12	12	18.4	88.702	768	21.162	1215600000	0.942908	0.849584	0.837257	1.18738	1.14323	1.1164	0.00226338	0.762907
F1PPL5	F1PPL5	tr|F1PPL5|F1PPL5_CANLF Dehydrogenase/reductase 13 OS=Canis lupus familiaris GN=DHRS13 PE=4 SV=1	1	8	8	8	21.3	47.079	428	33.281	762180000	0.851002	0.812018	0.923166	1.1237	1.07345	1.21411	0.00633549	0.758133
F1PPL6;F1PXB8;J9P6K0	F1PPL6	tr|F1PPL6|F1PPL6_CANLF RAP2C, member of RAS oncogene family OS=Canis lupus familiaris GN=RAP2C PE=4 SV=2	3	3	3	3	16.4	20.745	183	13.573	3948500000	0.822064	0.714257	0.856104	1.08462	1.16831	1.29578	0.00673543	0.67417
F1PQU2	F1PQU2	tr|F1PQU2|F1PQU2_CANLF Pitrilysin metallopeptidase 1 OS=Canis lupus familiaris GN=PITRM1 PE=4 SV=2	1	28	28	28	30.6	116.61	1034	80.007	5994800000	0.842132	0.96318	0.87444	1.01294	1.0901	1.16824	0.0267228	0.819175
F1PRB0;L7N096	F1PRB0	tr|F1PRB0|F1PRB0_CANLF Uncharacterized protein OS=Canis lupus familiaris GN=LOC486530 PE=3 SV=2	2	30	24	17	70.9	50.883	461	217.57	653000000000	0.832124	0.800339	0.884398	0.994312	1.07336	1.12055	0.00718459	0.789427
F1PRD1	F1PRD1	tr|F1PRD1|F1PRD1_CANLF Ribosome biogenesis regulatory protein OS=Canis lupus familiaris GN=RRS1 PE=3 SV=2	1	7	7	7	23.8	41.22	365	57.83	4036600000	0.674066	0.757223	0.703999	0.822619	0.855491	0.965805	0.0269319	0.807624
J9P3Y1;F1PRK7	J9P3Y1;F1PRK7	tr|J9P3Y1|J9P3Y1_CANLF ATP synthase mitochondrial F1 complex assembly factor 2 OS=Canis lupus familiaris GN=ATPAF2 PE=4 SV=1;tr|F1PRK7|F1PRK7_CANLF ATP synthase mitochondrial F1 complex assembly factor 2 OS=Canis lupus familiaris GN=ATPAF2 PE=4 SV=2	2	1	1	1	4.9	28.039	244	4.8028	165860000	0.733591	0.712769	0.706836	1.19006	1.20875	1.14793	1.92996e-05	0.607091
F1PRV6;J9NRR9	F1PRV6;J9NRR9	tr|F1PRV6|F1PRV6_CANLF YME1 like 1 ATPase OS=Canis lupus familiaris GN=YME1L1 PE=3 SV=2;tr|J9NRR9|J9NRR9_CANLF YME1 like 1 ATPase OS=Canis lupus familiaris GN=YME1L1 PE=3 SV=1	2	11	11	11	18.6	83.368	748	50.195	1423000000	0.824346	0.831815	0.846238	1.08349	1.09291	1.17459	0.000672515	0.746766
F1PSB7;Q28923;E2RC06;E2RC09;J9P4H4;E2R589	F1PSB7;Q28923	tr|F1PSB7|F1PSB7_CANLF Tyrosine-protein kinase OS=Canis lupus familiaris GN=YES1 PE=3 SV=2;sp|Q28923|YES_CANLF Tyrosine-protein kinase Yes OS=Canis lupus familiaris GN=YES1 PE=1 SV=3	6	7	7	4	17.6	60.634	541	21.381	1076500000	1.02736	0.894203	0.847762	1.13519	1.14069	1.13784	0.0162764	0.811232
F1PSC4	F1PSC4	tr|F1PSC4|F1PSC4_CANLF ELAV-like protein OS=Canis lupus familiaris GN=ELAVL1 PE=3 SV=2	1	10	10	9	38.6	37.144	334	62.963	13193000000	0.872651	0.835071	0.930214	1.07341	1.0372	1.151	0.00878124	0.808784
F1PSN8;F1PQY5	F1PSN8;F1PQY5	tr|F1PSN8|F1PSN8_CANLF Epithelial splicing regulatory protein 1 OS=Canis lupus familiaris GN=ESRP1 PE=4 SV=2;tr|F1PQY5|F1PQY5_CANLF Epithelial splicing regulatory protein 1 OS=Canis lupus familiaris GN=ESRP1 PE=4 SV=2	2	5	5	5	9.5	70.262	634	16.717	470980000	0.889621	0.747761	0.735663	1.20255	1.04601	1.076	0.00999435	0.713792
F1PTE0;J9PA38;Q9XSS6	F1PTE0	tr|F1PTE0|F1PTE0_CANLF Serine and arginine rich splicing factor 6 OS=Canis lupus familiaris GN=SRSF6 PE=4 SV=2	3	12	12	7	32.6	39.621	344	29.77	11265000000	0.841937	0.806016	0.843241	0.985959	1.0582	1.18718	0.0147937	0.770947
F1PTK1;E2QUC3	F1PTK1;E2QUC3	tr|F1PTK1|F1PTK1_CANLF Succinate--CoA ligase [GDP-forming] subunit beta, mitochondrial OS=Canis lupus familiaris GN=SUCLG2 PE=3 SV=2;tr|E2QUC3|E2QUC3_CANLF Succinate--CoA ligase [GDP-forming] subunit beta, mitochondrial OS=Canis lupus familiaris GN=SUCLG2	2	18	18	18	39.8	46.836	432	65.828	13366000000	0.800267	0.876704	0.870335	1.05586	1.05638	1.16261	0.0049159	0.777838
F1PUB9	F1PUB9	tr|F1PUB9|F1PUB9_CANLF Elongation factor Tu GTP binding domain containing 2 OS=Canis lupus familiaris GN=EFTUD2 PE=4 SV=2	1	21	20	20	30	109.45	972	194.59	5673000000	0.905843	0.804071	0.918548	1.00589	1.056	1.0928	0.0164641	0.833194
F1PUE0;Q9XT65	F1PUE0	tr|F1PUE0|F1PUE0_CANLF Topoisomerase (DNA) I OS=Canis lupus familiaris GN=TOP1 PE=4 SV=2	2	16	16	16	20.1	91.267	770	81.181	7422000000	0.822882	0.792096	0.855746	1.06174	1.03	1.19552	0.00725427	0.751606
F1PUT4	F1PUT4	tr|F1PUT4|F1PUT4_CANLF Basic leucine zipper and W2 domains 2 OS=Canis lupus familiaris GN=BZW2 PE=4 SV=2	1	14	14	14	27.7	48.162	419	127.27	2737400000	0.871511	0.97487	0.858936	1.17743	1.10855	1.14478	0.00442459	0.788548
Q05052;F1PVU1	Q05052;F1PVU1	sp|Q05052|OST48_CANLF Dolichyl-diphosphooligosaccharide--protein glycosyltransferase 48 kDa subunit OS=Canis lupus familiaris GN=DDOST PE=1 SV=1;tr|F1PVU1|F1PVU1_CANLF Dolichyl-diphosphooligosaccharide--protein glycosyltransferase 48 kDa subunit OS=Canis l	2	14	14	14	38	49.634	445	160.78	10006000000	0.878187	0.856563	0.866362	0.979481	1.1615	1.06509	0.0189611	0.81131
F1PWE3	F1PWE3	tr|F1PWE3|F1PWE3_CANLF Transmembrane 9 superfamily member OS=Canis lupus familiaris GN=TM9SF4 PE=3 SV=2	1	5	5	5	9.3	74.495	642	9.9925	729110000	0.71351	0.833779	0.869568	1.05343	1.03099	1.16327	0.0113714	0.744179
F1PWL7	F1PWL7	tr|F1PWL7|F1PWL7_CANLF Translocase of outer mitochondrial membrane 40 OS=Canis lupus familiaris GN=TOMM40 PE=4 SV=2	1	6	6	6	26	37.668	361	54.065	3801800000	0.878037	0.785075	0.877648	1.023	1.09667	1.14578	0.00690423	0.778074
F1PWN2;F6X8D7	F1PWN2;F6X8D7	tr|F1PWN2|F1PWN2_CANLF Solute carrier family 2 member 1 OS=Canis lupus familiaris GN=SLC2A1 PE=3 SV=2;tr|F6X8D7|F6X8D7_CANLF Solute carrier family 2 member 1 OS=Canis lupus familiaris GN=SLC2A1 PE=3 SV=1	2	4	4	4	6.9	54.1	492	12.469	798370000	0.82816	0.713703	0.625752	1.23403	0.883426	1.22591	0.0389614	0.648333
F1PX67;F1P8Z1	F1PX67;F1P8Z1	tr|F1PX67|F1PX67_CANLF Histone cluster 1 H1 family member c OS=Canis lupus familiaris GN=HIST1H1C PE=3 SV=2;tr|F1P8Z1|F1P8Z1_CANLF Uncharacterized protein OS=Canis lupus familiaris PE=3 SV=2	2	13	4	1	43.7	21.383	213	13.755	27153000000	0.720389	0.65695	0.552095	1.0775	1.26845	0.914572	0.0173679	0.591756
F1PY24	F1PY24	tr|F1PY24|F1PY24_CANLF ATP synthase, H+ transporting, mitochondrial F1 complex, delta subunit OS=Canis lupus familiaris GN=ATP5D PE=3 SV=2	1	3	3	3	22.6	17.529	168	36.24	8927500000	0.785599	0.919005	0.857294	1.02279	1.15481	0.993493	0.0319162	0.807892
F1PZ37	F1PZ37	tr|F1PZ37|F1PZ37_CANLF Synaptogyrin 2 OS=Canis lupus familiaris GN=SYNGR2 PE=4 SV=2	1	1	1	1	3.9	33.281	308	2.6469	281690000	0.985081	0.825434	0.805376	1.21915	1.17067	1.5446	0.0280589	0.664872
F1Q073;J9P9C6	F1Q073;J9P9C6	tr|F1Q073|F1Q073_CANLF DEAD-box helicase 27 OS=Canis lupus familiaris GN=DDX27 PE=3 SV=2;tr|J9P9C6|J9P9C6_CANLF DEAD-box helicase 27 OS=Canis lupus familiaris GN=DDX27 PE=3 SV=1	2	7	7	7	9	86.814	767	21.633	550220000	0.906412	0.938702	0.864345	1.07512	1.0919	1.34996	0.0423367	0.770393
F1Q0B0	F1Q0B0	tr|F1Q0B0|F1Q0B0_CANLF Nucleolin OS=Canis lupus familiaris GN=NCL PE=4 SV=2	1	29	29	29	38	77.481	715	323.31	137000000000	0.818048	0.770174	0.782929	1.10455	1.19886	1.15635	0.000296947	0.685351
F1Q0S2	F1Q0S2	tr|F1Q0S2|F1Q0S2_CANLF Sodium/potassium-transporting ATPase subunit beta OS=Canis lupus familiaris GN=ATP1B3 PE=3 SV=2	1	6	6	6	26	24.95	223	10.347	2700900000	0.885462	0.847555	0.925088	1.06316	1.09928	1.26028	0.0168771	0.776605
F1Q1C5;J9P393	F1Q1C5;J9P393	tr|F1Q1C5|F1Q1C5_CANLF Staufen double-stranded RNA binding protein 1 OS=Canis lupus familiaris GN=STAU1 PE=4 SV=2;tr|J9P393|J9P393_CANLF Staufen double-stranded RNA binding protein 1 OS=Canis lupus familiaris GN=STAU1 PE=4 SV=1	2	5	5	5	10.5	64.602	591	13.992	528680000	0.871387	0.794836	0.874185	1.16224	1.14782	1.3242	0.00423543	0.699015
F1Q1E1	F1Q1E1	tr|F1Q1E1|F1Q1E1_CANLF Lamin B2 OS=Canis lupus familiaris GN=LMNB2 PE=3 SV=2	1	11	9	9	20.2	60.621	539	23.641	4991100000	0.760729	0.734015	0.66085	1.07684	1.1508	1.18147	0.000632262	0.632304
F1Q1K6;E2QXH4;F1PP12;J9PBE1	F1Q1K6;E2QXH4	tr|F1Q1K6|F1Q1K6_CANLF Heterogeneous nuclear ribonucleoprotein A2/B1 OS=Canis lupus familiaris GN=HNRNPA2B1 PE=4 SV=2;tr|E2QXH4|E2QXH4_CANLF Heterogeneous nuclear ribonucleoprotein A2/B1 OS=Canis lupus familiaris GN=HNRNPA2B1 PE=4 SV=2	4	19	19	17	64.6	37.394	353	263.04	158000000000	0.823142	0.764176	0.728215	1.05855	1.08138	1.15183	0.00117443	0.703432
F1Q1M2	F1Q1M2	tr|F1Q1M2|F1Q1M2_CANLF Isoleucyl-tRNA synthetase 2, mitochondrial OS=Canis lupus familiaris GN=IARS2 PE=3 SV=2	1	14	14	14	17.4	105.62	940	49.455	3520400000	0.851936	0.796804	0.813476	1.00714	0.937753	1.08484	0.0141847	0.812682
F1Q2A2	F1Q2A2	tr|F1Q2A2|F1Q2A2_CANLF Ornithine aminotransferase OS=Canis lupus familiaris GN=OAT PE=3 SV=1	1	13	13	13	39.3	48.441	440	82.814	11272000000	0.84724	0.816616	0.860491	1.03562	1.02675	1.12612	0.00296775	0.791704
F1Q3A2	F1Q3A2	tr|F1Q3A2|F1Q3A2_CANLF Transmembrane protease serine OS=Canis lupus familiaris GN=TMPRSS11E PE=3 SV=2	1	6	6	6	14.9	47.761	422	18.266	748610000	0.688851	0.673275	0.80842	1.17422	1.52524	1.48331	0.00482123	0.518926
F1Q3G5	F1Q3G5	tr|F1Q3G5|F1Q3G5_CANLF Leucine rich repeat containing 59 OS=Canis lupus familiaris GN=LRRC59 PE=4 SV=2	1	10	10	10	33	36.641	324	134.27	14054000000	0.809556	0.798807	0.777833	0.984102	0.985362	1.00141	5.65532e-05	0.803195
F1Q435	F1Q435	tr|F1Q435|F1Q435_CANLF Transglutaminase 2 OS=Canis lupus familiaris GN=TGM2 PE=4 SV=2	1	3	3	3	3.8	77.151	687	5.9027	282960000	0.722915	0.766713	0.687426	1.50221	1.34374	1.75565	0.00270393	0.473108
L7N0L3;J9NRV0;F2Z4N2;Q6B829	L7N0L3;J9NRV0;F2Z4N2	tr|L7N0L3|L7N0L3_CANLF Histone H4 OS=Canis lupus familiaris PE=3 SV=1;tr|J9NRV0|J9NRV0_CANLF Histone H4 OS=Canis lupus familiaris PE=3 SV=1;tr|F2Z4N2|F2Z4N2_CANLF Histone H4 OS=Canis lupus familiaris GN=HIST1H4A PE=3 SV=1	4	7	7	7	55.2	10.709	96	59.782	610000000000	0.713159	0.625671	0.738907	1.04056	1.1196	1.10158	0.000700935	0.637002
Q9XSU6;F2Z4N6	Q9XSU6;F2Z4N6	tr|Q9XSU6|Q9XSU6_CANLF Splicing factor (Fragment) OS=Canis lupus familiaris GN=srp20 PE=2 SV=1;tr|F2Z4N6|F2Z4N6_CANLF Serine and arginine rich splicing factor 3 OS=Canis lupus familiaris GN=SRSF3 PE=4 SV=1	2	5	4	4	38.3	15.305	133	7.9791	4272000000	0.740926	0.791498	0.798957	1.02339	1.13971	1.10446	0.00131827	0.713492
F6UQ33	F6UQ33	tr|F6UQ33|F6UQ33_CANLF Phospholipase A2 OS=Canis lupus familiaris GN=PLA2G4A PE=4 SV=1	1	5	5	5	6.9	85.309	749	7.6955	253290000	0.977826	0.863487	0.83231	1.13826	1.08231	1.31437	0.0255811	0.756342
J9P2A4;F6UUY0	J9P2A4;F6UUY0	tr|J9P2A4|J9P2A4_CANLF Ataxin 2 OS=Canis lupus familiaris GN=ATXN2 PE=4 SV=1;tr|F6UUY0|F6UUY0_CANLF Ataxin 2 OS=Canis lupus familiaris GN=ATXN2 PE=4 SV=1	2	6	5	5	6.2	132.58	1254	23.271	303620000	1.00469	1.04451	0.919888	1.13602	1.13629	1.31277	0.041606	0.828179
F6UV28	F6UV28	tr|F6UV28|F6UV28_CANLF Translocated promoter region, nuclear basket protein OS=Canis lupus familiaris GN=TPR PE=4 SV=1	1	56	56	56	31	239.51	2127	323.31	8173900000	0.869244	0.908242	0.930785	1.03106	1.0577	1.19209	0.0227	0.825478
F6V2H2	F6V2H2	tr|F6V2H2|F6V2H2_CANLF Phosphoenolpyruvate carboxykinase 2, mitochondrial OS=Canis lupus familiaris GN=PCK2 PE=3 SV=1	1	19	19	19	35.2	79.121	716	155.03	9889000000	0.752513	0.893148	0.830307	1.03587	0.977712	1.05411	0.0134822	0.80711
F6V8G4	F6V8G4	tr|F6V8G4|F6V8G4_CANLF DExD-box helicase 21 OS=Canis lupus familiaris GN=DDX21 PE=4 SV=1	1	28	28	26	39.7	87.735	786	111.7	17272000000	0.880374	0.883014	0.834161	1.01482	1.02544	1.13826	0.0104189	0.817219
J9P3D2;F6X834;Q28246	J9P3D2;F6X834	tr|J9P3D2|J9P3D2_CANLF Histone H2A OS=Canis lupus familiaris GN=H2AFV PE=3 SV=1;tr|F6X834|F6X834_CANLF Histone H2A OS=Canis lupus familiaris GN=H2AFZ PE=3 SV=1	3	4	2	2	31.2	13.509	128	9.0283	8676200000	0.856557	0.832521	0.780137	1.00349	1.08983	1.15956	0.00662189	0.759086
F6X8N0;J9NWW4	F6X8N0;J9NWW4	tr|F6X8N0|F6X8N0_CANLF Acidic nuclear phosphoprotein 32 family member E OS=Canis lupus familiaris GN=ANP32E PE=4 SV=1;tr|J9NWW4|J9NWW4_CANLF Acidic nuclear phosphoprotein 32 family member E OS=Canis lupus familiaris GN=ANP32E PE=4 SV=1	2	3	3	3	17.7	30.461	265	44.186	2118000000	0.849055	0.931703	0.946808	1.38018	1.32159	1.32806	0.000259501	0.676844
F6XAE9	F6XAE9	tr|F6XAE9|F6XAE9_CANLF RNA-binding protein 8A OS=Canis lupus familiaris GN=RBM8A PE=3 SV=1	1	5	5	5	31.6	19.889	174	25.507	3680300000	0.823893	0.936052	0.773662	1.06525	0.981639	1.10518	0.0267264	0.803792
F6XFY9;F1PTS0	F6XFY9	tr|F6XFY9|F6XFY9_CANLF Protein arginine methyltransferase 1 OS=Canis lupus familiaris GN=PRMT1 PE=3 SV=1	2	15	15	15	39.4	42.461	371	45.427	8899900000	0.896788	0.915543	0.928585	1.13574	1.14673	1.16304	4.24692e-05	0.795504
F6XHA7	F6XHA7	tr|F6XHA7|F6XHA7_CANLF Uncharacterized protein OS=Canis lupus familiaris GN=CIRBP PE=4 SV=1	1	2	2	2	13.5	19.716	185	7.4169	692520000	0.8593	0.671394	0.918839	1.08278	1.3241	1.27257	0.0172629	0.665733
F6XII0;REV__F6XII0	F6XII0	tr|F6XII0|F6XII0_CANLF UTP15, small subunit processome component OS=Canis lupus familiaris GN=UTP15 PE=4 SV=1	2	4	4	4	10.3	58.247	517	16.597	594380000	0.836955	0.697031	0.757085	1.05247	1.18428	1.2765	0.00601346	0.652123
F6XIK8	F6XIK8	tr|F6XIK8|F6XIK8_CANLF Synaptotagmin binding cytoplasmic RNA interacting protein OS=Canis lupus familiaris GN=SYNCRIP PE=4 SV=1	1	22	16	16	47.5	62.656	562	171.78	25044000000	0.761088	0.781998	0.710899	1.12706	1.25905	1.25145	0.0006405	0.619642
F6XKI0	F6XKI0	tr|F6XKI0|F6XKI0_CANLF Pyrroline-5-carboxylate reductase OS=Canis lupus familiaris GN=PYCR1 PE=3 SV=1	1	8	8	4	27.6	35.609	341	34.94	2474700000	0.855487	0.842263	0.87309	1.09269	1.03827	1.18455	0.00470625	0.775399
F6Y140	F6Y140	tr|F6Y140|F6Y140_CANLF KH-type splicing regulatory protein OS=Canis lupus familiaris GN=KHSRP PE=4 SV=1	1	18	15	15	38.4	63.289	602	179.02	8182400000	0.85426	0.926867	0.9184	1.05247	1.08019	1.12963	0.0043075	0.827495
F6Y258;E2QY06	F6Y258	tr|F6Y258|F6Y258_CANLF General transcription factor IIi OS=Canis lupus familiaris GN=GTF2I PE=3 SV=1	2	14	14	13	15.8	112.46	999	35.032	1806100000	0.916048	0.858133	0.856823	1.05322	1.12382	1.02996	0.00501009	0.820395
F6Y732	F6Y732	tr|F6Y732|F6Y732_CANLF SDA1 domain containing 1 OS=Canis lupus familiaris GN=SDAD1 PE=4 SV=1	1	3	3	3	5	80.367	694	11.926	145500000	0.880043	0.752494	0.924285	1.15208	1.02728	1.09019	0.0194342	0.782011
H9GW68;F1PK40	H9GW68	tr|H9GW68|H9GW68_CANLF Oxoglutarate dehydrogenase OS=Canis lupus familiaris GN=OGDH PE=4 SV=2	2	12	12	12	18	90.67	798	43.028	3509900000	0.924121	0.806463	0.810167	1.0329	1.10152	0.997894	0.0159899	0.811143
J9P4N8;J9JHA1;F1PY06	J9P4N8;J9JHA1;F1PY06	tr|J9P4N8|J9P4N8_CANLF Transcription elongation regulator 1 OS=Canis lupus familiaris GN=TCERG1 PE=4 SV=1;tr|J9JHA1|J9JHA1_CANLF Transcription elongation regulator 1 OS=Canis lupus familiaris GN=TCERG1 PE=4 SV=1;tr|F1PY06|F1PY06_CANLF Transcription elongat	3	16	16	16	15.6	121.89	1076	37.291	2412000000	0.816123	0.844584	0.812167	1.08905	1.06095	0.990756	0.00198218	0.787349
J9P604;J9NWG3;J9NRF4;J9PAN7;J9P086;J9NZE4;J9P8B6;J9P533;J9NYU5;L7N0L5;F1P782	J9P604;J9NWG3;J9NRF4;J9PAN7;J9P086;J9NZE4;J9P8B6;J9P533;J9NYU5;L7N0L5;F1P782	tr|J9P604|J9P604_CANLF Histone H2B OS=Canis lupus familiaris GN=HIST1H2BB PE=3 SV=1;tr|J9NWG3|J9NWG3_CANLF Histone H2B OS=Canis lupus familiaris GN=LOC611089 PE=3 SV=1;tr|J9NRF4|J9NRF4_CANLF Histone H2B OS=Canis lupus familiaris GN=HIST1H2BJ PE=3 SV=1;tr|J	11	8	8	2	53.2	13.991	126	37.449	482000000000	0.738182	0.634426	0.608001	1.05829	1.2851	1.05961	0.00510933	0.582019
J9NRU3	J9NRU3	tr|J9NRU3|J9NRU3_CANLF Translocase of inner mitochondrial membrane 9 OS=Canis lupus familiaris GN=TIMM9 PE=3 SV=1	1	3	3	3	34.8	10.382	89	7.6466	2347100000	0.859859	0.815287	0.894049	1.01266	1.08799	1.13902	0.00664102	0.793045
J9NRZ2	J9NRZ2	tr|J9NRZ2|J9NRZ2_CANLF RAB18, member RAS oncogene family OS=Canis lupus familiaris GN=RAB18 PE=4 SV=1	1	5	5	5	30.1	22.903	206	12.994	786890000	0.78125	0.787045	1.01084	1.03405	1.13776	1.25691	0.0462908	0.752216
J9NU88;E2QXU3	J9NU88	tr|J9NU88|J9NU88_CANLF Uncharacterized protein OS=Canis lupus familiaris PE=4 SV=1	2	5	5	5	48.1	11.864	106	38.707	11157000000	0.91484	0.772025	0.936235	1.14437	1.13877	1.06621	0.0134736	0.783167
J9NW26	J9NW26	tr|J9NW26|J9NW26_CANLF EF-hand domain family member D1 OS=Canis lupus familiaris GN=EFHD1 PE=4 SV=1	1	4	2	2	30.7	18.486	163	25.064	223770000	0.528885	0.880195	0.578093	1.21813	1.23674	1.50399	0.01018	0.501956
J9NYK7	J9NYK7	tr|J9NYK7|J9NYK7_CANLF Uncharacterized protein OS=Canis lupus familiaris GN=LOC100855913 PE=4 SV=1	1	3	3	3	13.4	35.247	322	27.39	2433200000	0.888323	0.704684	0.865227	1.09675	1.22575	1.24458	0.00755982	0.689144
J9NYQ8;S5U7Q9	J9NYQ8;S5U7Q9	tr|J9NYQ8|J9NYQ8_CANLF Eukaryotic translation initiation factor 1A, X-linked OS=Canis lupus familiaris GN=EIF1AX PE=3 SV=1;tr|S5U7Q9|S5U7Q9_CANLF eIF1AY OS=Canis lupus familiaris GN=EIF1AY PE=2 SV=1	2	3	3	3	21.5	16.46	144	10.222	3206900000	0.90421	0.959276	0.953773	1.20823	1.23919	1.17164	0.000522336	0.77845
J9NYU7;F1PH55;A0A286T5F5	J9NYU7;F1PH55;A0A286T5F5	tr|J9NYU7|J9NYU7_CANLF X-ray repair cross complementing 5 OS=Canis lupus familiaris GN=XRCC5 PE=4 SV=1;tr|F1PH55|F1PH55_CANLF X-ray repair cross complementing 5 OS=Canis lupus familiaris GN=XRCC5 PE=4 SV=1;tr|A0A286T5F5|A0A286T5F5_CANLF Ku80 OS=Canis lupus	3	4	4	4	5.9	92.964	829	9.8686	4704800000	0.965629	1.00987	0.895618	1.09367	1.31756	1.19338	0.0283463	0.796514
J9NZ41	J9NZ41	tr|J9NZ41|J9NZ41_CANLF Uncharacterized protein OS=Canis lupus familiaris PE=3 SV=1	1	16	16	16	31.6	59.85	506	75.045	1786800000	0.915501	0.881219	0.822441	1.02536	1.10211	1.11921	0.00618173	0.806719
J9NZ45	J9NZ45	tr|J9NZ45|J9NZ45_CANLF RAP2B, member of RAS oncogene family OS=Canis lupus familiaris GN=RAP2B PE=4 SV=1	1	5	5	5	35.1	16.915	148	37.018	1406000000	0.787764	0.648557	0.734083	1.1575	1.41173	1.38939	0.00278844	0.548274
J9NZZ6	J9NZZ6	tr|J9NZZ6|J9NZZ6_CANLF Uncharacterized protein OS=Canis lupus familiaris PE=4 SV=1	1	5	5	5	19.6	29.873	271	27.54	1132900000	0.829977	0.780801	0.907059	0.995231	1.06577	1.17039	0.0192718	0.77918
J9P014;E2RJQ2	J9P014;E2RJQ2	tr|J9P014|J9P014_CANLF Far upstream element binding protein 1 OS=Canis lupus familiaris GN=FUBP1 PE=4 SV=1;tr|E2RJQ2|E2RJQ2_CANLF Far upstream element binding protein 1 OS=Canis lupus familiaris GN=FUBP1 PE=4 SV=2	2	24	24	21	46.4	67.546	644	124.18	21585000000	0.868228	0.941674	0.809565	1.11488	1.04916	1.17764	0.0106554	0.783879
J9P1J9;E2RJ92	J9P1J9;E2RJ92	tr|J9P1J9|J9P1J9_CANLF Acyl carrier protein OS=Canis lupus familiaris PE=3 SV=1;tr|E2RJ92|E2RJ92_CANLF Acyl carrier protein OS=Canis lupus familiaris GN=NDUFAB1 PE=3 SV=1	2	2	2	2	15.5	15.995	148	9.8892	1995200000	0.642353	0.774816	0.909494	1.17622	0.987	1.00278	0.0462876	0.734891
J9P276	J9P276	tr|J9P276|J9P276_CANLF Peptidyl-prolyl cis-trans isomerase OS=Canis lupus familiaris PE=3 SV=1	1	2	2	2	16.2	11.268	105	3.9873	313840000	0.649591	0.586735	0.989219	1.11692	1.0765	1.08112	0.0496848	0.679651
J9P2H0	J9P2H0	tr|J9P2H0|J9P2H0_CANLF Spectrin alpha, non-erythrocytic 1 OS=Canis lupus familiaris GN=SPTAN1 PE=4 SV=1	1	116	116	3	53	282.25	2452	323.31	118000000000	0.843299	0.865738	0.883359	1.02968	1.03003	1.0817	0.000922415	0.825233
J9P2I8	J9P2I8	tr|J9P2I8|J9P2I8_CANLF Serine and arginine rich splicing factor 7 OS=Canis lupus familiaris GN=SRSF7 PE=4 SV=1	1	6	6	5	25.6	27.379	238	14.776	9422900000	0.829019	0.827021	0.864523	1.0303	1.06894	1.22561	0.011701	0.758101
J9P3G1;F1PBK4	J9P3G1;F1PBK4	tr|J9P3G1|J9P3G1_CANLF Lamin B1 OS=Canis lupus familiaris GN=LMNB1 PE=3 SV=1;tr|F1PBK4|F1PBK4_CANLF Lamin B1 OS=Canis lupus familiaris GN=LMNB1 PE=3 SV=2	2	27	26	25	58.7	53.995	475	233.17	37152000000	0.711349	0.684463	0.679107	1.07456	1.21133	1.25452	0.000897205	0.586068
J9P492;F1PUP0;F1PU17	J9P492;F1PUP0;F1PU17	tr|J9P492|J9P492_CANLF Uncharacterized protein OS=Canis lupus familiaris GN=U2AF1 PE=4 SV=1;tr|F1PUP0|F1PUP0_CANLF Uncharacterized protein OS=Canis lupus familiaris GN=U2AF1 PE=4 SV=2;tr|F1PU17|F1PU17_CANLF Uncharacterized protein OS=Canis lupus familiaris	3	4	4	4	17.1	27.872	240	9.5183	1774000000	0.779802	0.738863	0.872826	1.00137	1.14608	1.16167	0.00907963	0.7227
J9P4M1;E2RCN4	J9P4M1;E2RCN4	tr|J9P4M1|J9P4M1_CANLF Torsin 1A interacting protein 1 OS=Canis lupus familiaris GN=TOR1AIP1 PE=4 SV=1;tr|E2RCN4|E2RCN4_CANLF Torsin 1A interacting protein 1 OS=Canis lupus familiaris GN=TOR1AIP1 PE=4 SV=2	2	10	10	9	25.1	56.114	501	57.744	2134600000	0.878803	0.810876	0.732777	1.05338	1.09117	0.938458	0.0242097	0.785743
J9P5G4;E2R0G4	J9P5G4;E2R0G4	tr|J9P5G4|J9P5G4_CANLF DNA-directed RNA polymerase subunit OS=Canis lupus familiaris GN=POLR1A PE=3 SV=1;tr|E2R0G4|E2R0G4_CANLF DNA-directed RNA polymerase subunit OS=Canis lupus familiaris GN=POLR1A PE=3 SV=2	2	15	15	15	8.9	194.11	1717	28.811	677560000	0.933903	0.842192	0.86567	1.03243	0.987275	1.19337	0.0494564	0.822193
J9P5T5;F1PCJ7	J9P5T5;F1PCJ7	tr|J9P5T5|J9P5T5_CANLF Polypyrimidine tract binding protein 1 OS=Canis lupus familiaris GN=PTBP1 PE=4 SV=1;tr|F1PCJ7|F1PCJ7_CANLF Polypyrimidine tract binding protein 1 OS=Canis lupus familiaris GN=PTBP1 PE=4 SV=1	2	18	18	15	51.2	59.578	557	204.81	20985000000	0.823089	0.849255	0.811179	1.04359	1.06383	1.10944	0.000406537	0.772034
J9P6J9	J9P6J9	tr|J9P6J9|J9P6J9_CANLF Coiled-coil domain containing 58 OS=Canis lupus familiaris GN=CCDC58 PE=4 SV=1	1	5	5	5	29.8	21.322	188	15.482	1216000000	0.768747	0.805468	0.868302	1.02582	1.0577	1.23876	0.015469	0.735194
J9P748;E2RE69	J9P748;E2RE69	tr|J9P748|J9P748_CANLF Bromodomain adjacent to zinc finger domain 1A OS=Canis lupus familiaris GN=BAZ1A PE=4 SV=1;tr|E2RE69|E2RE69_CANLF Bromodomain adjacent to zinc finger domain 1A OS=Canis lupus familiaris GN=BAZ1A PE=4 SV=2	2	14	14	14	11.5	178.69	1557	32.156	712470000	0.88183	0.77516	0.787403	0.994405	1.06532	1.19616	0.0164507	0.75076
J9PB22;J9P7X1;F1PTK7;F1PQZ0	J9PB22;J9P7X1	tr|J9PB22|J9PB22_CANLF Histone H3 OS=Canis lupus familiaris GN=HIST1H3F PE=3 SV=1;tr|J9P7X1|J9P7X1_CANLF Histone H3 OS=Canis lupus familiaris GN=LOC483172 PE=3 SV=1	4	5	5	1	28.7	15.404	136	11.697	365000000000	0.746296	0.658989	0.701239	1.07271	1.16666	1.18194	0.000496444	0.615708
J9P923	J9P923	tr|J9P923|J9P923_CANLF Caveolae associated protein 1 OS=Canis lupus familiaris GN=CAVIN1 PE=4 SV=1	1	14	14	14	36.9	43.467	390	229.38	30702000000	0.798922	0.81043	0.896388	1.06583	1.10018	1.14243	0.0021231	0.757379
J9P9U7	J9P9U7	tr|J9P9U7|J9P9U7_CANLF Histone cluster 1 H1 family member e OS=Canis lupus familiaris GN=HIST1H1E PE=3 SV=1	1	13	13	4	42.5	21.865	219	66.904	179000000000	0.795597	0.666714	0.603005	1.06003	1.10998	1.05325	0.00289422	0.640753
J9PAU4	J9PAU4	tr|J9PAU4|J9PAU4_CANLF Sterile alpha motif domain containing 9 like OS=Canis lupus familiaris GN=SAMD9L PE=4 SV=1	1	16	16	16	10.3	180.96	1560	75.308	974500000	0.977445	0.896699	0.944863	1.21244	1.19478	1.19532	0.000415321	0.782506
P33724;Q3HTT5;F1PWG1	P33724	sp|P33724|CAV1_CANLF Caveolin-1 OS=Canis lupus familiaris GN=CAV1 PE=1 SV=1	3	9	9	9	51.1	20.605	178	35.553	48318000000	0.900696	0.797833	0.877405	0.998716	1.12915	1.15699	0.0150619	0.784184
Q28298;E2RL02;E2RAB2	Q28298;E2RL02;E2RAB2	sp|Q28298|RRBP1_CANLF Ribosome-binding protein 1 OS=Canis lupus familiaris GN=RRBP1 PE=2 SV=1;tr|E2RL02|E2RL02_CANLF Ribosome-binding protein 1 OS=Canis lupus familiaris GN=RRBP1 PE=4 SV=2;tr|E2RAB2|E2RAB2_CANLF Ribosome-binding protein 1 OS=Canis lupus fa	3	39	39	39	37.7	164.58	1534	244.42	12366000000	0.830741	0.844658	0.801521	1.01911	1.05142	1.1122	0.00144678	0.77824
Q4W6L5	Q4W6L5	tr|Q4W6L5|Q4W6L5_CANLF Tissue factor OS=Canis lupus familiaris GN=TF PE=2 SV=1	1	2	2	2	8.2	32.669	292	2.5719	147450000	0.742837	0.772054	0.895716	1.0577	1.16999	1.25433	0.00838424	0.692302
Q5TJE7;F1PS20	Q5TJE7;F1PS20	sp|Q5TJE7|WDR46_CANLF WD repeat-containing protein 46 OS=Canis lupus familiaris GN=WDR46 PE=3 SV=1;tr|F1PS20|F1PS20_CANLF WD repeat-containing protein 46 OS=Canis lupus familiaris GN=WDR46 PE=4 SV=1	2	6	6	6	12.3	68.816	612	75.795	630620000	0.868722	0.830515	0.752648	0.986564	1.11816	0.99574	0.0165421	0.790812
Q5WR10;K9J6N8	Q5WR10;K9J6N8	sp|Q5WR10|DX39B_CANLF Spliceosome RNA helicase DDX39B OS=Canis lupus familiaris GN=DDX39B PE=3 SV=1;tr|K9J6N8|K9J6N8_CANLF Spliceosome RNA helicase DDX39B OS=Canis lupus familiaris GN=DDX39B PE=4 SV=1	2	13	13	4	36.2	49.021	428	193.84	24362000000	0.854533	0.774891	0.941107	1.04601	1.15695	1.21074	0.0146234	0.753005
Q7YRU7	Q7YRU7	sp|Q7YRU7|DSG3_CANLF Desmoglein-3 OS=Canis lupus familiaris GN=DSG3 PE=2 SV=1	1	12	12	12	17.6	107.55	993	162.82	2363200000	0.909604	0.86197	0.900907	1.03654	1.09472	1.13222	0.00331491	0.818905
J9P0V7;F1PPT0;A0A060KSW1;A0A059V712;J9NRX4;Q2VB21	J9P0V7;F1PPT0;A0A060KSW1;A0A059V712;J9NRX4	tr|J9P0V7|J9P0V7_CANLF Uncharacterized protein OS=Canis lupus familiaris GN=LOC474938 PE=4 SV=1;tr|F1PPT0|F1PPT0_CANLF Uncharacterized protein OS=Canis lupus familiaris GN=LOC474938 PE=4 SV=2;tr|A0A060KSW1|A0A060KSW1_CANLF Glutathione s-transferase alpha 3	6	4	4	4	16.6	25.657	223	7.4256	493080000	0	1.3727	1.48337	0	0.549879	0.70288	0.364321	2.27982
E9NIU8;A0A060GVR5;A0A060GPZ8;A0A060GPW9;A0A060GKW1;E9NIU3;E9NIT8;E9NJ71;E9NJ63;E9NJ58;E9NJ38;E9NJ33;E9NJ28;E9NJ23;E9NIZ0;E9NIQ8;E9NIP3;E9NIN8;V5LKX2;V5LJU4;V5LJN6;Q9ZZ61;Q49RZ6;Q49RX0;Q49RC5;Q1HKQ3;Q1HKG2;H8Y5I5;H8Y5H2;H8Y5F9;H8Y5D6;H8Y545;H8Y4W8;H8Y4V5;H8Y4K1;H8Y4I8;H8Y3Y0;H8Y3R5;H8Y3L3;H8Y3H4;H8Y3C3;H8Y3B0;H8Y371;H8Y358;H8Y319;H8Y2Y0;H8Y2U1;H8Y2L3;H8Y2H4;H8Y2G1;H8Y2E8;H8Y2D5;H8Y2C2;H8Y283;D4QA7…	E9NIU8;A0A060GVR5;A0A060GPZ8;A0A060GPW9;A0A060GKW1;E9NIU3;E9NIT8;E9NJ71;E9NJ63;E9NJ58;E9NJ38;E9NJ33;E9NJ28;E9NJ23;E9NIZ0;E9NIQ8;E9NIP3;E9NIN8;V5LKX2;V5LJU4;V5LJN6;Q9ZZ61;Q49RZ6;Q49RX0;Q49RC5;Q1HKQ3;Q1HKG2;H8Y5I5;H8Y5H2;H8Y5F9;H8Y5D6;H8Y545;H8Y4W8;H8Y4V5;H8Y4K1;H8Y4I8;H8Y3Y0;H8Y3R5;H8Y3L3;H8Y3H4;H8Y3C3;H8Y3B0;H8Y371;H8Y358;H8Y319;H8Y2Y0;H8Y2U1;H8Y2L3;H8Y2H4;H8Y2G1;H8Y2E8;H8Y2D5;H8Y2C2;H8Y283;D4QA7…	tr|E9NIU8|E9NIU8_CANLF Cytochrome c oxidase subunit 3 (Fragment) OS=Canis lupus familiaris GN=COX3 PE=3 SV=1;tr|A0A060GVR5|A0A060GVR5_CANLF Cytochrome c oxidase subunit 3 (Fragment) OS=Canis lupus familiaris GN=COX3 PE=3 SV=1;tr|A0A060GPZ8|A0A060GPZ8_CANLF	101	1	1	1	15.1	10.755	93	4.1708	304650000	0.967172	0.999605	0	1.14171	0.886377	0	0.967856	0.969768
V5LKL2;V5LJX3;V5LJU1;V5LJG3;Q9ZZ57;Q49RZ2;Q49RW6;Q49RS7;Q49RQ1;Q49RM5;Q49RI6;Q49RC1;Q1HKY0;Q1HKV1;Q1HKJ7;Q1HKH1;Q1HKF8;H8Y5L5;H8Y549;H8Y449;H8Y3D0;H8Y3C7;H8Y2N0;H8Y2J1;H8Y2C6;D4QA83;D4QA70;C4MVU5;C4MVK4;C4MV74;C4MUK3;C4MU47;C4MTU3;C4MTM8;C4MTL5;C4MTH6;C4MT85;C4MSW8;C4MSU2;C4MSS9;C4MSQ3;C4MSK1;C4MSI8;C4MSH5;C4MSG2;C4MSE9;C4MSD6;C4MSC3;C4MS32;C4MS19;C4MRU1;C4MRR5;C4MRQ2;B9U054;B9TZX6;B9TZV0;B9TZT7;…	V5LKL2;V5LJX3;V5LJU1;V5LJG3;Q9ZZ57;Q49RZ2;Q49RW6;Q49RS7;Q49RQ1;Q49RM5;Q49RI6;Q49RC1;Q1HKY0;Q1HKV1;Q1HKJ7;Q1HKH1;Q1HKF8;H8Y5L5;H8Y549;H8Y449;H8Y3D0;H8Y3C7;H8Y2N0;H8Y2J1;H8Y2C6;D4QA83;D4QA70;C4MVU5;C4MVK4;C4MV74;C4MUK3;C4MU47;C4MTU3;C4MTM8;C4MTL5;C4MTH6;C4MT85;C4MSW8;C4MSU2;C4MSS9;C4MSQ3;C4MSK1;C4MSI8;C4MSH5;C4MSG2;C4MSE9;C4MSD6;C4MSC3;C4MS32;C4MS19;C4MRU1;C4MRR5;C4MRQ2;B9U054;B9TZX6;B9TZV0;B9TZT7;…	tr|V5LKL2|V5LKL2_CANLF NADH-ubiquinone oxidoreductase chain 5 OS=Canis lupus familiaris GN=ND5 PE=3 SV=1;tr|V5LJX3|V5LJX3_CANLF NADH-ubiquinone oxidoreductase chain 5 OS=Canis lupus familiaris GN=ND5 PE=3 SV=1;tr|V5LJU1|V5LJU1_CANLF NADH-ubiquinone oxidore	173	2	2	2	2.8	67.08	606	3.1882	177450000	0.971282	0.923701	1.11299	1.028	0.998147	0.944164	0.84925	1.01268
Q49RZ9;H8Y2M3;C4MSS2;A0A172RRN6;A0A172RI05;A0A060H4R6;H8Y2X7;A0A289ZC75;A0A289YRD8;A0A289YDE6;A0A289Y2F9;V5LKV5;V5LKB8;V5LK77;Q49RY6;Q49RW0;Q49RE1;Q1HKN0;P67780;H8Y3H1;H8Y355;H8Y2T8;H8Y2I4;H8Y2B9;C4MW81;B9U073;B9TZV6;B9TYV5;B9TYG2;A0A172RTU9;A0A172RQA7;A0A172RPN9;A0A172RPK6;A0A172RLX2;A0A172RKQ8;A0A172RHI4;A0A172RB84;A0A172RB45;A0A172R9F2;A0A172R5G8;A0A172R578;A0A172R529;A0A172R3Q0;A0A140G348;A0A…	Q49RZ9;H8Y2M3;C4MSS2;A0A172RRN6;A0A172RI05;A0A060H4R6;H8Y2X7;A0A289ZC75;A0A289YRD8;A0A289YDE6;A0A289Y2F9;V5LKV5;V5LKB8;V5LK77;Q49RY6;Q49RW0;Q49RE1;Q1HKN0;P67780;H8Y3H1;H8Y355;H8Y2T8;H8Y2I4;H8Y2B9;C4MW81;B9U073;B9TZV6;B9TYV5;B9TYG2;A0A172RTU9;A0A172RQA7;A0A172RPN9;A0A172RPK6;A0A172RLX2;A0A172RKQ8;A0A172RHI4;A0A172RB84;A0A172RB45;A0A172R9F2;A0A172R5G8;A0A172R578;A0A172R529;A0A172R3Q0;A0A140G348;A0A…	tr|Q49RZ9|Q49RZ9_CANLF Cytochrome c oxidase subunit 2 OS=Canis lupus familiaris GN=COX2 PE=3 SV=1;tr|H8Y2M3|H8Y2M3_CANLF Cytochrome c oxidase subunit 2 OS=Canis lupus familiaris GN=COX2 PE=3 SV=1;tr|C4MSS2|C4MSS2_CANLF Cytochrome c oxidase subunit 2 OS=Can	57	3	3	3	15.9	26.031	227	12.47	1563600000	1.01487	1.01089	1.36095	1.01647	0.937979	0.903492	0.218158	1.18501
A0A075B5H7;J9NU47;D0VWQ4;J9P6P5;J9JHU1;J9P9C5;J9NWR0;J9P1B4	A0A075B5H7;J9NU47;D0VWQ4;J9P6P5;J9JHU1;J9P9C5	tr|A0A075B5H7|A0A075B5H7_CANLF Uncharacterized protein OS=Canis lupus familiaris PE=3 SV=1;tr|J9NU47|J9NU47_CANLF RPL36A-HNRNPH2 readthrough OS=Canis lupus familiaris GN=RPL36A-HNRNPH2 PE=3 SV=1;sp|D0VWQ4|RL36A_CANLF 60S ribosomal protein L36a OS=Canis lup	8	3	3	3	23.8	12.309	105	6.496	2842600000	1.07943	1.05112	0.857726	0.847786	0.789137	0.920739	0.144863	1.16836
P16967;A0A0A0MPC0	P16967;A0A0A0MPC0	sp|P16967|SSRA_CANLF Translocon-associated protein subunit alpha OS=Canis lupus familiaris GN=SSR1 PE=1 SV=1;tr|A0A0A0MPC0|A0A0A0MPC0_CANLF Translocon-associated protein subunit alpha OS=Canis lupus familiaris GN=SSR1 PE=4 SV=1	2	4	4	4	24.1	31.976	286	74.098	2238200000	0.937713	1.06752	0.978645	0.947602	0.982118	1.05771	0.982337	0.998811
A0A0A0MPC2;E2RK33	A0A0A0MPC2;E2RK33	tr|A0A0A0MPC2|A0A0A0MPC2_CANLF Glutamyl-tRNA(Gln) amidotransferase subunit C, mitochondrial OS=Canis lupus familiaris GN=GATC PE=3 SV=1;sp|E2RK33|GATC_CANLF Glutamyl-tRNA(Gln) amidotransferase subunit C, mitochondrial OS=Canis lupus familiaris GN=GATC PE=3	2	1	1	1	12.5	15.32	136	5.6741	69212000	0.551439	0.852428	0	0.906016	1.35425	0	0.576433	0.621106
S5U8I1;A0A0A0MPD1;E2R0S2;Q30DN6;Q38JA7	S5U8I1;A0A0A0MPD1;E2R0S2;Q30DN6;Q38JA7	tr|S5U8I1|S5U8I1_CANLF KDM5D OS=Canis lupus familiaris PE=2 SV=1;tr|A0A0A0MPD1|A0A0A0MPD1_CANLF Lysine-specific demethylase 5C OS=Canis lupus familiaris GN=KDM5C PE=4 SV=1;tr|E2R0S2|E2R0S2_CANLF Lysine-specific demethylase 5C OS=Canis lupus familiaris GN=K	5	1	1	1	1	117.96	1049	2.4541	22814000	1.04801	0	0.951519	1.2212	0	1.1968	0.803145	0.826936
A0A0A0MPD2;D0VWQ5;Q9XSU2	A0A0A0MPD2;D0VWQ5	tr|A0A0A0MPD2|A0A0A0MPD2_CANLF Ribosomal protein L19 OS=Canis lupus familiaris GN=RPL19 PE=3 SV=1;sp|D0VWQ5|RL19_CANLF 60S ribosomal protein L19 OS=Canis lupus familiaris GN=RPL19 PE=1 SV=1	3	6	6	6	26.3	23.247	194	29.891	18524000000	1.08472	1.0167	1.0217	1.03734	1.07618	1.02963	0.811422	0.993627
E2RBS6;A0A0A0MPD6	E2RBS6;A0A0A0MPD6	sp|E2RBS6|SETD3_CANLF Histone-lysine N-methyltransferase setd3 OS=Canis lupus familiaris GN=SETD3 PE=3 SV=1;tr|A0A0A0MPD6|A0A0A0MPD6_CANLF Histone-lysine N-methyltransferase OS=Canis lupus familiaris GN=SETD3 PE=3 SV=1	2	6	6	6	10.2	66.281	588	8.9989	185080000	1.03074	0.815172	0.849795	0.989927	1.04541	0.676628	0.969418	0.994006
A0A0B4J194;J9P3R1	A0A0B4J194	tr|A0A0B4J194|A0A0B4J194_CANLF Aspartate aminotransferase OS=Canis lupus familiaris GN=GOT2 PE=4 SV=1	2	20	20	20	45.6	47.44	430	117.97	36798000000	1.02821	0.971481	1.06221	0.943641	0.96049	0.913377	0.0524302	1.08674
A0A0B4J195	A0A0B4J195	tr|A0A0B4J195|A0A0B4J195_CANLF Aspartate aminotransferase OS=Canis lupus familiaris GN=GOT1 PE=4 SV=1	1	6	6	6	15.3	46.413	413	12.575	463520000	1.43493	1.10927	1.08834	0.832508	1.16993	0.877054	0.178983	1.26152
S5TR69;A0A0G2Y7A6;F1P910	S5TR69;A0A0G2Y7A6	tr|S5TR69|S5TR69_CANLF USP9Y OS=Canis lupus familiaris PE=2 SV=1;tr|A0A0G2Y7A6|A0A0G2Y7A6_CANLF USP9Y OS=Canis lupus familiaris GN=USP9Y PE=3 SV=1	3	9	3	3	3.6	287.87	2529	5.6194	136210000	1.24697	1.17369	1.03224	0.975008	0.802954	1.20829	0.308045	1.15627
S5TR75;A0A0G2YCS2;S5THR3	S5TR75;A0A0G2YCS2;S5THR3	tr|S5TR75|S5TR75_CANLF UBE1Y transcript 3 OS=Canis lupus familiaris PE=2 SV=1;tr|A0A0G2YCS2|A0A0G2YCS2_CANLF UBE1Y OS=Canis lupus familiaris GN=UBE1Y PE=3 SV=1;tr|S5THR3|S5THR3_CANLF UBE1Y transcript 2 OS=Canis lupus familiaris PE=2 SV=1	3	10	1	1	11.4	115.34	1029	9.9859	377910000	1.04938	1.05364	0.953059	0.975517	0.957275	0.979312	0.225679	1.04944
A0A0I9QQS7;F1PAY3	A0A0I9QQS7;F1PAY3	tr|A0A0I9QQS7|A0A0I9QQS7_CANLF Signal transducer and activator of transcription OS=Canis lupus familiaris GN=STAT6 PE=2 SV=1;tr|F1PAY3|F1PAY3_CANLF Signal transducer and activator of transcription OS=Canis lupus familiaris GN=STAT6 PE=3 SV=1	2	2	2	2	3.1	90.829	816	4.2058	86944000	0	1.10666	1.17899	0	0.941538	0.932598	0.794648	1.21958
P56590;F1P8R7;A0A0U2PTV9;A0A0U2PLQ3;Q5R2U0;X5L560;X5L1K8;Q5R2U2;Q5R2U1;P56592;F1Q2D9;Q5DWS2	P56590;F1P8R7;A0A0U2PTV9;A0A0U2PLQ3	sp|P56590|CP1A1_CANLF Cytochrome P450 1A1 OS=Canis lupus familiaris GN=CYP1A1 PE=2 SV=1;tr|F1P8R7|F1P8R7_CANLF Cytochrome P450 OS=Canis lupus familiaris GN=CYP1A1 PE=3 SV=2;tr|A0A0U2PTV9|A0A0U2PTV9_CANLF Cytochrome P450 OS=Canis lupus familiaris PE=2 SV=1;	12	3	3	3	6.5	59.209	524	14.93	165660000	0.905382	0.762677	0	0.9238	0.981977	0	0.860992	0.875265
A0A140DDD1;F1Q0Y3	A0A140DDD1;F1Q0Y3	tr|A0A140DDD1|A0A140DDD1_CANLF BH3 interacting domain death agonist OS=Canis lupus familiaris GN=BID PE=2 SV=1;tr|F1Q0Y3|F1Q0Y3_CANLF Uncharacterized protein OS=Canis lupus familiaris GN=BID PE=4 SV=2	2	2	2	2	12.3	22.368	195	5.6939	86885000	1.31231	1.24364	0	1.05784	0.632363	0	0.612206	1.51222
A0A140T8D9	A0A140T8D9	tr|A0A140T8D9|A0A140T8D9_CANLF Adaptor related protein complex 3 mu 2 subunit OS=Canis lupus familiaris GN=AP3M2 PE=3 SV=1	1	1	1	1	2.4	46.998	418	2.3552	178240000	1.11482	0	1.19265	0.898927	0	0.841251	0.715103	1.326
A0A140T8E0	A0A140T8E0	tr|A0A140T8E0|A0A140T8E0_CANLF Uncharacterized protein OS=Canis lupus familiaris GN=CAPRIN1 PE=4 SV=1	1	8	8	8	17.3	78.806	717	60.76	4969300000	0.929032	1.01151	0.966442	1.09818	0.902402	1.14487	0.365823	0.924187
Q9ZZ63;Q49RZ8;Q49RP4;C4MS78;B9TYB1;A0A172RN71;A0A172RAV4;A0A172R7Q5;V5LK29;V5LLA4;H8Y5C1;H8Y3Z1;A0A172R8A3;Q1HKK3;C4MSN4;A0A0K0K825;A0A060GW64	Q9ZZ63;Q49RZ8;Q49RP4;C4MS78;B9TYB1;A0A172RN71;A0A172RAV4;A0A172R7Q5;V5LK29;V5LLA4;H8Y5C1;H8Y3Z1;A0A172R8A3;Q1HKK3;C4MSN4;A0A0K0K825;A0A060GW64	sp|Q9ZZ63|ATP8_CANLF ATP synthase protein 8 OS=Canis lupus familiaris GN=MT-ATP8 PE=3 SV=1;tr|Q49RZ8|Q49RZ8_CANLF ATP synthase protein 8 OS=Canis lupus familiaris GN=ATP8 PE=3 SV=1;tr|Q49RP4|Q49RP4_CANLF ATP synthase protein 8 OS=Canis lupus familiaris GN=	17	3	3	3	50.7	7.9783	67	11.152	3648800000	1.05697	0.957871	0.943034	0.96856	0.969122	0.903181	0.404905	1.04119
E2RNG2;A0A1B1X469;F1PX22	E2RNG2;A0A1B1X469	tr|E2RNG2|E2RNG2_CANLF ATP synthase subunit alpha OS=Canis lupus familiaris GN=ATP5A1 PE=3 SV=1;tr|A0A1B1X469|A0A1B1X469_CANLF ATP synthase subunit alpha OS=Canis lupus familiaris PE=2 SV=1	3	25	25	25	47.7	59.674	553	323.31	152000000000	0.845309	0.863196	0.858871	0.979792	1.02762	1.00814	0.000555368	0.851378
F1PJP5;A0A1W2NC67	F1PJP5;A0A1W2NC67	sp|F1PJP5|STT3A_CANLF Dolichyl-diphosphooligosaccharide--protein glycosyltransferase subunit STT3A OS=Canis lupus familiaris GN=STT3A PE=1 SV=3;tr|A0A1W2NC67|A0A1W2NC67_CANLF Dolichyl-diphosphooligosaccharide--protein glycosyltransferase subunit STT3A OS=C	2	15	15	13	20	80.578	705	44.64	6409000000	0.903472	1.03134	0.854401	1.0143	0.951567	1.09856	0.247371	0.910191
A0A2D2CNI7;Q9TV04;Q9TV03;Q1W2J9;O46593;C3VJQ8;A1YVW4;A0A2D1VNS1;A0A2D1VNR8;L0ETE1	A0A2D2CNI7;Q9TV04;Q9TV03;Q1W2J9;O46593;C3VJQ8;A1YVW4;A0A2D1VNS1;A0A2D1VNR8;L0ETE1	tr|A0A2D2CNI7|A0A2D2CNI7_CANLF Prion protein (Fragment) OS=Canis lupus familiaris GN=PRNP PE=4 SV=1;tr|Q9TV04|Q9TV04_CANLF Prion protein (Fragment) OS=Canis lupus familiaris GN=PrP PE=3 SV=1;tr|Q9TV03|Q9TV03_CANLF Prion protein (Fragment) OS=Canis lupus fa	10	2	2	2	10	22.67	209	4.0874	165840000	0.942521	0	0.809148	1.05685	0	1.09133	0.789757	0.815419
A1EAA2;A0FI88	A1EAA2;A0FI88	tr|A1EAA2|A1EAA2_CANLF SMAP1 protein OS=Canis lupus familiaris GN=SMAP1 PE=2 SV=1;tr|A0FI88|A0FI88_CANLF SMAP1 OS=Canis lupus familiaris GN=SMAP1 PE=2 SV=1	2	1	1	1	2.5	48.366	446	3.2671	71612000	0.999461	0	0.969103	1.04854	0	0.980096	0.968167	0.970386
E2RDJ9;A0M8U6;F1PFX9	E2RDJ9;A0M8U6;F1PFX9	tr|E2RDJ9|E2RDJ9_CANLF Testin OS=Canis lupus familiaris GN=TES PE=4 SV=1;sp|A0M8U6|TES_CANLF Testin OS=Canis lupus familiaris GN=TES PE=3 SV=1;tr|F1PFX9|F1PFX9_CANLF Testin OS=Canis lupus familiaris GN=TES PE=4 SV=1	3	11	11	11	26.9	46.951	412	25.549	1936200000	1.1295	1.10703	1.00208	1.04741	0.936652	0.925854	0.118316	1.11296
A0M8V0	A0M8V0	sp|A0M8V0|CAZA2_CANLF F-actin-capping protein subunit alpha-2 OS=Canis lupus familiaris GN=CAPZA2 PE=3 SV=1	1	10	8	8	56.3	32.981	286	57.012	2299700000	0.97548	0.794082	1.00533	0.939164	1.13753	0.967966	0.376547	0.911398
A1DZY5	A1DZY5	tr|A1DZY5|A1DZY5_CANLF Diablo IAP-binding mitochondrial protein OS=Canis lupus familiaris GN=DIABLO PE=2 SV=1	1	6	6	6	25.3	26.787	237	57.707	1871400000	0.880209	0.909127	0.743698	0.945243	1.02285	0.778662	0.464864	0.922192
A1YV65;A1YV66	A1YV65;A1YV66	tr|A1YV65|A1YV65_CANLF Carcinoembryonic antigen-related cell adhesion molecule 30 isoform 2L1 OS=Canis lupus familiaris GN=CEACAM30 PE=2 SV=1;tr|A1YV66|A1YV66_CANLF Carcinoembryonic antigen-related cell adhesion molecule 30 isoform 2L2 OS=Canis lupus famil	2	2	2	1	5.3	36.51	337	4.1055	1036600000	1.25326	0	1.28943	0.80702	0	0.824493	0.579001	1.55849
J9P735;A1Z2X6;F1P6D7	J9P735;A1Z2X6;F1P6D7	tr|J9P735|J9P735_CANLF CD47 molecule OS=Canis lupus familiaris GN=CD47 PE=4 SV=1;tr|A1Z2X6|A1Z2X6_CANLF CD47 OS=Canis lupus familiaris PE=2 SV=1;tr|F1P6D7|F1P6D7_CANLF CD47 molecule OS=Canis lupus familiaris GN=CD47 PE=4 SV=2	3	3	3	3	8.9	33.15	303	8.0574	462860000	0.988675	1.12819	1.05393	0.95941	1.0664	1.00235	0.403128	1.0471
A2SXS7	A2SXS7	tr|A2SXS7|A2SXS7_CANLF Cell division cycle 73 OS=Canis lupus familiaris GN=HRPT2 PE=2 SV=1	1	9	9	9	16	60.576	531	17.193	320490000	0.894504	0.960076	1.06949	1.08207	0.985752	0.858169	0.994183	0.999344
A3RF36;E2RB52	A3RF36;E2RB52	sp|A3RF36|AL3A1_CANLF Aldehyde dehydrogenase, dimeric NADP-preferring OS=Canis lupus familiaris GN=ALDH3A1 PE=2 SV=1;tr|E2RB52|E2RB52_CANLF Aldehyde dehydrogenase OS=Canis lupus familiaris GN=ALDH3A1 PE=3 SV=2	2	2	1	0	4.6	50.712	453	3.5954	160830000	1.17464	1.05888	0	0.986937	0.950894	0	0.851609	1.15259
A7XZY9	A7XZY9	tr|A7XZY9|A7XZY9_CANLF Keratin 19 (Fragment) OS=Canis lupus familiaris GN=KRT19 PE=2 SV=1	1	5	1	1	61.8	8.5864	76	-2	224700000	0.868854	0.827342	0	0.955071	0.946693	0	0.879697	0.891906
A8W340;F1PAR8;J9P0Q7;J9P9X2	A8W340;F1PAR8;J9P0Q7	tr|A8W340|A8W340_CANLF Prohibitin OS=Canis lupus familiaris PE=2 SV=1;tr|F1PAR8|F1PAR8_CANLF Uncharacterized protein OS=Canis lupus familiaris GN=PHB PE=4 SV=1;tr|J9P0Q7|J9P0Q7_CANLF Uncharacterized protein OS=Canis lupus familiaris PE=4 SV=1	4	14	14	14	49.3	29.804	272	83.58	32856000000	0.856848	0.892636	0.916794	0.989053	0.991239	1.06648	0.0146984	0.875117
A8WED5;O18735;F1PIQ9;A0A060PY73;F1PQ05;A0A0A0WE41	A8WED5;O18735;F1PIQ9	tr|A8WED5|A8WED5_CANLF Receptor protein-tyrosine kinase (Fragment) OS=Canis lupus familiaris PE=2 SV=1;sp|O18735|ERBB2_CANLF Receptor tyrosine-protein kinase erbB-2 OS=Canis lupus familiaris GN=ERBB2 PE=2 SV=1;tr|F1PIQ9|F1PIQ9_CANLF Receptor protein-tyrosi	6	5	4	4	4.8	136.11	1242	9.1572	217300000	0.959617	0	0.841631	1.01378	0	1.4917	0.6827	0.718925
B1H0W0;F1PWR1	B1H0W0;F1PWR1	tr|B1H0W0|B1H0W0_CANLF Cation-independent mannose-6-phosphate/insulin-like growth factor 2 receptor protein OS=Canis lupus familiaris GN=CI-MPR/IGF2R PE=2 SV=1;tr|F1PWR1|F1PWR1_CANLF Insulin like growth factor 2 receptor OS=Canis lupus familiaris GN=IGF2R	2	6	6	6	2.9	274.53	2497	14.069	271280000	0.978636	0.993201	0.909719	0.952889	0.839366	1.0732	0.94434	1.00562
F1PA99;J9NY30;B2BMP5	F1PA99;J9NY30;B2BMP5	tr|F1PA99|F1PA99_CANLF Uncharacterized protein OS=Canis lupus familiaris GN=SLC35B2 PE=4 SV=2;tr|J9NY30|J9NY30_CANLF Uncharacterized protein OS=Canis lupus familiaris GN=SLC35B2 PE=4 SV=1;tr|B2BMP5|B2BMP5_CANLF 3-phosphoadenosine 5-phosphosulfate transpo	3	4	4	4	11.4	45.591	414	8.781	514450000	0.843169	1.33585	0.943219	1.07856	0.919063	1.17571	0.924097	0.983898
F1PX99;B2G3R6	F1PX99;B2G3R6	tr|F1PX99|F1PX99_CANLF Beta-1,4-galactosyltransferase 4 OS=Canis lupus familiaris GN=B4GALT4 PE=4 SV=1;tr|B2G3R6|B2G3R6_CANLF Beta-1,4-galactosyltransferase 4 OS=Canis lupus familiaris GN=b4GalT4 PE=2 SV=1	2	2	2	2	4.4	40.282	344	3.0076	57296000	0.925069	0.787603	0.885761	0.943469	1.12947	1.02931	0.0676982	0.837598
B2KN54;F6PLL5	B2KN54;F6PLL5	tr|B2KN54|B2KN54_CANLF TRPV4 OS=Canis lupus familiaris PE=2 SV=1;tr|F6PLL5|F6PLL5_CANLF Transient receptor potential cation channel subfamily V member 4 OS=Canis lupus familiaris GN=TRPV4 PE=3 SV=1	2	4	4	4	6.3	98.199	871	8.619	162260000	0.914012	0	1.18622	0.938435	0	0.759811	0.785245	1.23671
O46674;B6CAN1;J9P9P2;E2RRB2;J9P2B9;E2RQY6;Q8SPX2	O46674;B6CAN1	sp|O46674|AT2A2_CANLF Sarcoplasmic/endoplasmic reticulum calcium ATPase 2 OS=Canis lupus familiaris GN=ATP2A2 PE=2 SV=1;tr|B6CAN1|B6CAN1_CANLF Calcium-transporting ATPase OS=Canis lupus familiaris PE=2 SV=1	7	35	35	35	39.8	109.65	997	274.5	21033000000	0.955393	0.885925	0.926094	0.947368	1.0075	1.06553	0.100331	0.916238
B6F250;F1PFS1	B6F250;F1PFS1	tr|B6F250|B6F250_CANLF Erythrocyte band 7 integral membrane protein stomatin OS=Canis lupus familiaris GN=STOM PE=2 SV=1;tr|F1PFS1|F1PFS1_CANLF Stomatin OS=Canis lupus familiaris GN=STOM PE=4 SV=2	2	10	10	10	40.8	31.207	284	84.552	5197700000	1.14071	0.983098	0.980087	0.981229	1.03845	0.917858	0.431512	1.05663
B7ZDP5;E2RHV9	B7ZDP5;E2RHV9	tr|B7ZDP5|B7ZDP5_CANLF Cytochrome c oxidase polypeptide Vb OS=Canis lupus familiaris GN=cox5b PE=2 SV=1;tr|E2RHV9|E2RHV9_CANLF Cytochrome c oxidase subunit 5B OS=Canis lupus familiaris GN=COX5B PE=4 SV=1	2	6	6	6	37.5	13.986	128	15.08	8336500000	0.968261	1.06639	1.06001	0.975552	0.857985	1.0574	0.361561	1.07047
J9NWY5;F1PCF2;B8K1W2	J9NWY5;F1PCF2;B8K1W2	tr|J9NWY5|J9NWY5_CANLF ATP binding cassette subfamily B member 11 OS=Canis lupus familiaris GN=ABCB11 PE=4 SV=1;tr|F1PCF2|F1PCF2_CANLF ATP binding cassette subfamily B member 11 OS=Canis lupus familiaris GN=ABCB11 PE=4 SV=1;tr|B8K1W2|B8K1W2_CANLF ATP-bindi	3	2	1	1	1.9	146.03	1319	6.602	302490000	0	1.13995	1.21757	0	1.02868	1.07348	0.87953	1.12148
F1PNA2;B8K1W7	F1PNA2;B8K1W7	tr|F1PNA2|F1PNA2_CANLF ATP binding cassette subfamily C member 4 OS=Canis lupus familiaris GN=ABCC4 PE=4 SV=2;tr|B8K1W7|B8K1W7_CANLF ATP-binding cassette protein C4 OS=Canis lupus familiaris GN=Abcc4 PE=2 SV=1	2	6	6	5	5.1	149.61	1326	12.721	404630000	0.922518	0.872653	0	1.02478	1.03328	0	0.856788	0.872267
E2R329;C1KG39	E2R329;C1KG39	tr|E2R329|E2R329_CANLF Cytochrome P450 family 1 subfamily B member 1 OS=Canis lupus familiaris GN=CYP1B1 PE=3 SV=2;tr|C1KG39|C1KG39_CANLF Cytochrome P450 family 1 subfamily B polypeptide 1 OS=Canis lupus familiaris GN=CYP1B1 PE=1 SV=1	2	3	3	3	6.6	60.393	543	8.5657	397100000	0.930378	1.03909	1.08113	0.974052	0.914165	1.15969	0.992219	1.00088
C7C419;E2RHY7	C7C419;E2RHY7	tr|C7C419|C7C419_CANLF Serpin peptidase inhibitor, clade H (Heat shock protein 47), member 1, (Collagen binding protein 1) OS=Canis lupus familiaris GN=SERPINH1 PE=1 SV=1;tr|E2RHY7|E2RHY7_CANLF Serpin family H member 1 OS=Canis lupus familiaris GN=SERPINH1	2	15	15	15	35.4	46.61	418	217.86	14963000000	1.01491	1.1014	1.02419	0.827493	0.952295	0.863327	0.0228773	1.18818
D0VWQ3	D0VWQ3	sp|D0VWQ3|RL18_CANLF Ribosomal protein L18 OS=Canis lupus familiaris GN=RPL18 PE=1 SV=2	1	7	7	7	38.3	21.592	188	40.649	24247000000	1.06518	1.0083	0.999391	1.00801	0.995226	1.05768	0.893963	1.0039
F1PSQ3;D2YYC0;E2RP23;E2R327;E2R326	F1PSQ3;D2YYC0;E2RP23	tr|F1PSQ3|F1PSQ3_CANLF Mothers against decapentaplegic homolog OS=Canis lupus familiaris GN=SMAD3 PE=3 SV=2;tr|D2YYC0|D2YYC0_CANLF Mothers against decapentaplegic homolog OS=Canis lupus familiaris GN=Madh3 PE=2 SV=1;tr|E2RP23|E2RP23_CANLF Mothers against d	5	3	3	3	7.8	48.239	425	4.4792	107490000	1.01491	1.23524	0	1.23894	0.714124	0	0.859058	1.15211
D5LG84;F1P7R1;Q2EFX8	D5LG84;F1P7R1	tr|D5LG84|D5LG84_CANLF NADPH--cytochrome P450 reductase OS=Canis lupus familiaris GN=OR PE=2 SV=1;tr|F1P7R1|F1P7R1_CANLF NADPH--cytochrome P450 reductase OS=Canis lupus familiaris GN=POR PE=3 SV=2	3	15	15	15	22.6	76.981	678	32.823	2899500000	0.873606	0.839288	0.958458	1.04205	1.02769	1.05604	0.0140643	0.854619
D9ILX1;E2R119;J9NYU6	D9ILX1;E2R119	tr|D9ILX1|D9ILX1_CANLF Cytochrome b5A microsomal variant OS=Canis lupus familiaris GN=cyb5A PE=2 SV=1;tr|E2R119|E2R119_CANLF Uncharacterized protein OS=Canis lupus familiaris PE=3 SV=1	3	5	5	5	47.8	15.345	134	25.872	7951200000	0.819687	0.878335	0.741436	1.0965	0.892003	0.956527	0.0799429	0.828329
E2QRQ8	E2QRQ8	tr|E2QRQ8|E2QRQ8_CANLF Glutaminyl-tRNA synthetase OS=Canis lupus familiaris GN=QARS PE=3 SV=1	1	11	10	10	17.5	87.784	775	47.4	1488500000	0.94368	0.916686	0.896265	0.968017	0.952218	0.933563	0.12882	0.965952
J9P440;E2QRR5	J9P440;E2QRR5	tr|J9P440|J9P440_CANLF Arginyl-tRNA synthetase OS=Canis lupus familiaris GN=RARS PE=3 SV=1;tr|E2QRR5|E2QRR5_CANLF Arginyl-tRNA synthetase OS=Canis lupus familiaris GN=RARS PE=3 SV=1	2	22	22	22	36.1	73.817	643	79.644	6008900000	0.985001	0.923898	1.0435	0.970823	0.87113	0.964981	0.363083	1.05182
E2QRU0;J9P7N2	E2QRU0	tr|E2QRU0|E2QRU0_CANLF DnaJ heat shock protein family (Hsp40) member C8 OS=Canis lupus familiaris GN=DNAJC8 PE=4 SV=1	2	5	5	5	16.6	29.836	253	9.5886	769250000	1.0386	1.18038	1.01108	1.10512	1.03743	1.16846	0.697879	0.975548
E2QRU5	E2QRU5	tr|E2QRU5|E2QRU5_CANLF Family with sequence similarity 162 member A OS=Canis lupus familiaris GN=FAM162A PE=4 SV=1	1	3	3	3	20	17.626	155	6.5062	365490000	1.09817	0.924679	1.01016	0.99799	0.912294	1.04257	0.693327	1.02715
E2QRU7	E2QRU7	tr|E2QRU7|E2QRU7_CANLF Cullin 2 OS=Canis lupus familiaris GN=CUL2 PE=3 SV=1	1	3	3	3	3.8	87.005	745	6.3187	170440000	1.25983	0.929594	0.95762	1.02958	0.676865	0.735772	0.196863	1.2886
E2QRX1	E2QRX1	tr|E2QRX1|E2QRX1_CANLF Vacuolar protein sorting-associated protein 35 OS=Canis lupus familiaris GN=VPS35 PE=3 SV=1	1	18	18	18	25.8	91.706	796	61.764	5256200000	1.21013	1.14175	1.1168	1.01198	0.93045	1.04785	0.023176	1.15999
F6V6Y8;E2QRY7	F6V6Y8;E2QRY7	tr|F6V6Y8|F6V6Y8_CANLF BCL2 interacting protein 1 OS=Canis lupus familiaris GN=BNIP1 PE=4 SV=1;tr|E2QRY7|E2QRY7_CANLF BCL2 interacting protein 1 OS=Canis lupus familiaris GN=BNIP1 PE=4 SV=2	2	4	4	4	21.2	20.965	184	10.545	302930000	0.884315	0.935075	0.837666	0.946116	0.990092	1.15298	0.104829	0.860116
E2QS16	E2QS16	tr|E2QS16|E2QS16_CANLF Hydroxy-delta-5-steroid dehydrogenase, 3 beta- and steroid delta-isomerase 7 OS=Canis lupus familiaris GN=HSD3B7 PE=3 SV=1	1	2	2	2	7.3	41.413	369	8.3449	243120000	0.96852	0.97043	0.967357	1.03249	0.879936	1.04277	0.772395	0.983456
E2QXN0;E2QS21;J9NUM2	E2QXN0;E2QS21;J9NUM2	tr|E2QXN0|E2QXN0_CANLF Family with sequence similarity 98 member B OS=Canis lupus familiaris GN=FAM98B PE=4 SV=2;tr|E2QS21|E2QS21_CANLF Family with sequence similarity 98 member B OS=Canis lupus familiaris GN=FAM98B PE=4 SV=1;tr|J9NUM2|J9NUM2_CANLF Family	3	3	3	3	13.5	34.7	312	45.675	836650000	1.01063	1.09734	1.1326	0.989131	1.03205	1.09357	0.424856	1.04039
E2QS43	E2QS43	tr|E2QS43|E2QS43_CANLF TAR DNA binding protein OS=Canis lupus familiaris GN=TARDBP PE=4 SV=1	1	5	5	5	12.1	44.606	414	13.138	1729100000	0.910624	1.01488	0.915471	1.03851	0.95258	1.1804	0.213813	0.895786
E2QS97	E2QS97	tr|E2QS97|E2QS97_CANLF Mitochondrial ribosomal protein L24 OS=Canis lupus familiaris GN=MRPL24 PE=3 SV=1	1	1	1	1	4.6	25.062	219	2.3815	113360000	0.898717	0.908508	0.446461	0.935741	2.00159	0.406104	0.502362	0.674064
E2QSA1;F6UTU8	E2QSA1;F6UTU8	tr|E2QSA1|E2QSA1_CANLF Chromosome 1 open reading frame 27 OS=Canis lupus familiaris GN=C1orf27 PE=4 SV=1;tr|F6UTU8|F6UTU8_CANLF Chromosome 1 open reading frame 27 OS=Canis lupus familiaris GN=C1orf27 PE=4 SV=1	2	4	4	4	11.2	51.256	455	9.487	190840000	0.938545	1.1718	0	1.01933	0.990654	0	0.948889	1.04993
E2QSE3	E2QSE3	tr|E2QSE3|E2QSE3_CANLF Flotillin 1 OS=Canis lupus familiaris GN=FLOT1 PE=4 SV=1	1	5	5	5	13.3	47.339	427	11.024	172370000	0.818261	1.03424	0.586684	0.929008	1.06696	0.390205	0.94565	1.02222
E2QSF4;J9P716;J9NVB5	E2QSF4	tr|E2QSF4|E2QSF4_CANLF Tubulin beta chain OS=Canis lupus familiaris GN=TUBB PE=3 SV=1	3	17	4	3	55.6	49.67	444	47.372	20893000000	1.11895	1.10707	1.01696	1.02757	1.15649	1.02164	0.830927	1.01163
E2QSF5	E2QSF5	tr|E2QSF5|E2QSF5_CANLF CCR4-NOT transcription complex subunit 2 OS=Canis lupus familiaris GN=CNOT2 PE=4 SV=1	1	2	2	2	4.6	59.737	540	3.5611	203470000	0	1.04079	0.658333	0	1.03432	1.23061	0.71879	0.750187
E2QSQ5	E2QSQ5	tr|E2QSQ5|E2QSQ5_CANLF O-linked N-acetylglucosamine (GlcNAc) transferase OS=Canis lupus familiaris GN=OGT PE=4 SV=1	1	9	9	9	9.9	116.91	1046	22.934	415530000	1.05484	0.959957	0.977308	1.07157	1.03074	1.19814	0.152282	0.906576
E2QSS3	E2QSS3	tr|E2QSS3|E2QSS3_CANLF Caseinolytic mitochondrial matrix peptidase chaperone subunit OS=Canis lupus familiaris GN=CLPX PE=4 SV=1	1	7	7	7	12.8	69.287	633	19.083	810330000	0.972313	1.01361	0.965202	1.02826	1.14562	1.07012	0.0598717	0.909715
E2QSZ0;F6UPR4	E2QSZ0;F6UPR4	tr|E2QSZ0|E2QSZ0_CANLF SAMM50 sorting and assembly machinery component OS=Canis lupus familiaris GN=SAMM50 PE=4 SV=1;tr|F6UPR4|F6UPR4_CANLF SAMM50 sorting and assembly machinery component OS=Canis lupus familiaris GN=SAMM50 PE=4 SV=1	2	7	7	7	18.6	51.877	469	16.194	1760800000	0.985187	0.880177	1.06361	0.997454	0.878457	1.02116	0.88515	1.01101
E2QT37	E2QT37	tr|E2QT37|E2QT37_CANLF Nucleoporin 50 OS=Canis lupus familiaris GN=NUP50 PE=4 SV=1	1	6	6	6	15.2	49.043	460	14.199	272030000	0.964524	0.898483	1.16089	1.19697	1.02446	1.15786	0.278393	0.894829
E2QTB7;F6V322	E2QTB7;F6V322	tr|E2QTB7|E2QTB7_CANLF CDK5 regulatory subunit associated protein 3 OS=Canis lupus familiaris GN=CDK5RAP3 PE=4 SV=1;tr|F6V322|F6V322_CANLF CDK5 regulatory subunit associated protein 3 OS=Canis lupus familiaris GN=CDK5RAP3 PE=4 SV=1	2	5	5	4	9.7	56.79	504	4.5759	328930000	0.896484	0.75221	1.00874	1.01368	1.14806	0.877787	0.302468	0.87429
E2QTE3	E2QTE3	tr|E2QTE3|E2QTE3_CANLF Endoplasmic reticulum-golgi intermediate compartment 1 OS=Canis lupus familiaris GN=ERGIC1 PE=4 SV=1	1	8	8	8	33.1	32.601	290	45.505	2434500000	1.04401	0.897099	1.03333	0.997205	0.908582	0.965828	0.559695	1.03581
E2QTG4	E2QTG4	tr|E2QTG4|E2QTG4_CANLF Protein tyrosine kinase 2 beta OS=Canis lupus familiaris GN=PTK2B PE=3 SV=1	1	1	1	1	0.9	115.84	1009	-2	221080000	1.2187	1.01889	0	1.09751	0.951903	0	0.908175	1.09182
E2QTH4;J9NX20	E2QTH4;J9NX20	tr|E2QTH4|E2QTH4_CANLF Secernin 2 OS=Canis lupus familiaris GN=SCRN2 PE=4 SV=1;tr|J9NX20|J9NX20_CANLF Secernin 2 OS=Canis lupus familiaris GN=SCRN2 PE=4 SV=1	2	2	2	2	6.4	46.617	425	8.1729	90310000	1.51428	1.41496	0.939654	0.871333	0.800637	0.617964	0.0523885	1.68952
E2QTL0	E2QTL0	tr|E2QTL0|E2QTL0_CANLF Uncharacterized protein OS=Canis lupus familiaris GN=VKORC1 PE=4 SV=1	1	2	2	2	14.7	18.01	163	4.2247	183780000	1.00045	0.814096	1.14579	0.907258	0.861908	1.08363	0.775403	1.03769
E2QTL3	E2QTL3	tr|E2QTL3|E2QTL3_CANLF Mitochondrial fission 1 protein OS=Canis lupus familiaris GN=FIS1 PE=3 SV=1	1	2	2	2	13.2	16.895	152	4.055	363130000	0.872268	1.05666	0.994913	0.995151	0.907478	1.01522	0.976399	1.00205
E2QTN0;E2RDZ9	E2QTN0	tr|E2QTN0|E2QTN0_CANLF Kinesin-like protein OS=Canis lupus familiaris GN=KIF5B PE=3 SV=1	2	17	17	14	21.7	109.75	963	49.477	4723900000	1.01762	1.076	0.999091	1.09613	1.01776	0.999828	0.861299	0.993258
E2QTQ8	E2QTQ8	tr|E2QTQ8|E2QTQ8_CANLF Uncharacterized protein OS=Canis lupus familiaris GN=SQRDL PE=4 SV=1	1	13	13	13	36.4	49.932	450	61.079	4743100000	0.961726	0.897754	1.01924	0.997259	0.974326	0.948479	0.733904	0.98584
E2QTR2	E2QTR2	tr|E2QTR2|E2QTR2_CANLF SAM and HD domain containing deoxynucleoside triphosphate triphosphohydrolase 1 OS=Canis lupus familiaris GN=SAMHD1 PE=4 SV=1	1	1	1	1	2.1	72.471	627	3.3981	24633000	0.921631	0	0.836134	1.23181	0	1.39222	0.614187	0.669874
E2QTS3;F6UQJ5;F6UQI5	E2QTS3;F6UQJ5;F6UQI5	tr|E2QTS3|E2QTS3_CANLF Uncharacterized protein OS=Canis lupus familiaris GN=LUC7L2 PE=4 SV=1;tr|F6UQJ5|F6UQJ5_CANLF Uncharacterized protein OS=Canis lupus familiaris GN=LUC7L2 PE=4 SV=1;tr|F6UQI5|F6UQI5_CANLF Uncharacterized protein OS=Canis lupus familiar	3	14	14	7	36	46.522	392	30.584	2045700000	0.922295	0.908735	0.858746	1.01624	0.879511	1.11897	0.206926	0.892214
E2RPT4;E2QTT0	E2RPT4;E2QTT0	tr|E2RPT4|E2RPT4_CANLF DExD-box helicase 50 OS=Canis lupus familiaris GN=DDX50 PE=4 SV=2;tr|E2QTT0|E2QTT0_CANLF DExD-box helicase 50 OS=Canis lupus familiaris GN=DDX50 PE=4 SV=1	2	6	4	4	9.3	77.17	687	7.135	241870000	1.04411	1.04833	1.10113	1.00137	1.01532	1.25816	0.766818	0.97518
E2QTT8	E2QTT8	tr|E2QTT8|E2QTT8_CANLF Heat shock factor binding protein 1 OS=Canis lupus familiaris GN=HSBP1 PE=4 SV=1	1	2	2	2	39.5	8.4825	76	7.1364	347190000	0.826206	0.980527	1.07833	1.04221	0.924323	0.81739	0.748115	1.03633
E2QTW8	E2QTW8	tr|E2QTW8|E2QTW8_CANLF Calcium-transporting ATPase OS=Canis lupus familiaris GN=ATP2C1 PE=3 SV=2	1	3	3	3	4.7	104.03	949	8.8144	118500000	0.963854	0.973473	0.882611	1.03684	1.37841	1.21638	0.0580228	0.776494
E2QU31	E2QU31	tr|E2QU31|E2QU31_CANLF Phenylalanyl-tRNA synthetase alpha subunit OS=Canis lupus familiaris GN=FARSA PE=4 SV=1	1	12	12	12	26.4	57.472	508	50.76	2118400000	1.10084	1.10539	1.07945	1.02106	0.819169	0.933246	0.0443713	1.18468
E2QU34	E2QU34	tr|E2QU34|E2QU34_CANLF Cationic amino acid transporter 1 OS=Canis lupus familiaris GN=SLC7A1 PE=2 SV=1	1	1	1	1	2.1	68.243	629	3.4084	144210000	0.941343	0.744232	0	1.07689	1.02753	0	0.773399	0.800966
E2QU52	E2QU52	tr|E2QU52|E2QU52_CANLF Serine/threonine-protein phosphatase OS=Canis lupus familiaris GN=PPP4C PE=3 SV=1	1	7	6	6	29	35.08	307	25.203	636970000	0.955813	1.08908	0.851848	1.09338	1.16059	0.898072	0.460992	0.919003
E2QU53	E2QU53	tr|E2QU53|E2QU53_CANLF NOP56 ribonucleoprotein OS=Canis lupus familiaris GN=NOP56 PE=4 SV=1	1	15	15	15	31.5	66.443	597	103.43	6205800000	0.88378	0.810648	0.880012	0.931867	0.941662	1.01463	0.0414939	0.891377
E2RIA4;E2QU79	E2RIA4;E2QU79	tr|E2RIA4|E2RIA4_CANLF Coenzyme A synthase OS=Canis lupus familiaris GN=COASY PE=3 SV=2;tr|E2QU79|E2QU79_CANLF Coenzyme A synthase OS=Canis lupus familiaris GN=COASY PE=3 SV=2	2	4	4	4	7.3	62.18	564	9.151	1065300000	1.19835	0.840432	1.19001	0.974866	0.960462	0.822998	0.286054	1.17056
E2QU96	E2QU96	tr|E2QU96|E2QU96_CANLF Pre-mRNA processing factor 38A OS=Canis lupus familiaris GN=PRPF38A PE=4 SV=2	1	5	5	5	17.3	37.476	312	12.559	790080000	0.920459	0.942252	0.885643	1.10152	0.917613	1.21092	0.139206	0.850871
E2QUA5	E2QUA5	tr|E2QUA5|E2QUA5_CANLF ER membrane protein complex subunit 8 OS=Canis lupus familiaris GN=EMC8 PE=4 SV=1	1	5	5	5	36.7	23.804	210	37.467	300910000	0.988616	1.09545	0	0.974634	1.9105	0	0.703355	0.722349
E2QUA6	E2QUA6	tr|E2QUA6|E2QUA6_CANLF Syntaxin binding protein 3 OS=Canis lupus familiaris GN=STXBP3 PE=3 SV=1	1	2	2	2	4.2	67.744	592	5.4829	82340000	1.10145	0.974856	0	0.932955	1.6549	0	0.787654	0.802328
E2QUA8	E2QUA8	tr|E2QUA8|E2QUA8_CANLF Cytochrome c oxidase subunit 4I1 OS=Canis lupus familiaris GN=COX4I1 PE=4 SV=1	1	8	8	8	45.6	19.575	169	26.209	11941000000	0.936592	0.910378	1.01359	0.983764	0.920817	1.02919	0.609618	0.975044
E2QUB3	E2QUB3	tr|E2QUB3|E2QUB3_CANLF Cleavage stimulation factor subunit 1 OS=Canis lupus familiaris GN=CSTF1 PE=4 SV=1	1	5	5	5	15.3	48.367	431	29.625	596980000	0.887047	0.941115	1.02294	1.04709	1.04185	1.10363	0.061542	0.893041
E2QUB9;F1PTM3;F1PCN7	E2QUB9;F1PTM3	tr|E2QUB9|E2QUB9_CANLF Isocitrate dehydrogenase [NAD] subunit, mitochondrial OS=Canis lupus familiaris GN=IDH3B PE=3 SV=1;tr|F1PTM3|F1PTM3_CANLF Isocitrate dehydrogenase [NAD] subunit, mitochondrial OS=Canis lupus familiaris GN=IDH3B PE=3 SV=2	3	11	11	11	35.1	42.332	385	70.23	2117100000	0.869758	0.836974	0.784917	0.997431	0.975346	0.888532	0.0409156	0.870807
E2QUD5	E2QUD5	tr|E2QUD5|E2QUD5_CANLF GADD45G interacting protein 1 OS=Canis lupus familiaris GN=GADD45GIP1 PE=4 SV=1	1	3	3	3	16.4	25.307	219	6.2281	485720000	0.917054	1.03599	0.961454	0.972101	1.0201	0.974424	0.671674	0.982429
J9P9R4;E2QUE2	J9P9R4;E2QUE2	tr|J9P9R4|J9P9R4_CANLF tRNA (guanine(26)-N(2))-dimethyltransferase OS=Canis lupus familiaris GN=TRMT1 PE=3 SV=1;tr|E2QUE2|E2QUE2_CANLF tRNA methyltransferase 1 OS=Canis lupus familiaris GN=TRMT1 PE=3 SV=2	2	2	2	2	3.6	69.333	637	3.584	30358000	1.06022	0	1.00894	1.04168	0	0.88914	0.927176	1.07165
E2QUE7	E2QUE7	tr|E2QUE7|E2QUE7_CANLF Ribosomal protein L26 OS=Canis lupus familiaris GN=RPL26 PE=3 SV=2	1	7	7	7	35.2	17.258	145	14.612	15279000000	1.09197	1.00281	0.988932	1.03666	1.0291	0.878824	0.487409	1.04725
E2QUF8	E2QUF8	tr|E2QUF8|E2QUF8_CANLF CLPTM1 like OS=Canis lupus familiaris GN=CLPTM1L PE=4 SV=1	1	3	3	3	5.9	62.427	539	7.6057	159390000	0.843229	0.718375	0.984249	0.971535	1.0921	1.45748	0.120221	0.723026
E2QUG8;E2QUI9	E2QUG8;E2QUI9	tr|E2QUG8|E2QUG8_CANLF ATP-dependent (S)-NAD(P)H-hydrate dehydratase OS=Canis lupus familiaris GN=CARKD PE=3 SV=2;sp|E2QUI9|NNRD_CANLF ATP-dependent (S)-NAD(P)H-hydrate dehydratase OS=Canis lupus familiaris GN=NAXD PE=3 SV=1	2	2	2	2	6.4	35.162	329	4.3497	64141000	1.15932	0	1.13164	0.942381	0	0.934347	0.793572	1.22072
E2QUH1	E2QUH1	tr|E2QUH1|E2QUH1_CANLF Proline, glutamate and leucine rich protein 1 OS=Canis lupus familiaris GN=PELP1 PE=4 SV=2	1	4	4	4	3.7	122.72	1171	6.6522	381160000	0.905013	0.873291	1.1132	1.01337	1.03977	1.06376	0.382401	0.927685
E2QUI2;E2QUK3	E2QUI2;E2QUK3	tr|E2QUI2|E2QUI2_CANLF Sarcolemma associated protein OS=Canis lupus familiaris GN=SLMAP PE=4 SV=2;tr|E2QUK3|E2QUK3_CANLF Sarcolemma associated protein OS=Canis lupus familiaris GN=SLMAP PE=4 SV=2	2	8	8	8	11	94.659	824	14.281	211070000	0.94776	1.06393	0.909461	1.08027	1.22945	1.15923	0.0449073	0.842084
E2QUI5;J9P6Y8	E2QUI5;J9P6Y8	tr|E2QUI5|E2QUI5_CANLF Chromodomain helicase DNA binding protein 1 OS=Canis lupus familiaris GN=CHD1 PE=4 SV=1;tr|J9P6Y8|J9P6Y8_CANLF Chromodomain helicase DNA binding protein 1 OS=Canis lupus familiaris GN=CHD1 PE=4 SV=1	2	6	6	5	4.4	197.01	1711	22.834	156400000	0.964082	1.09942	0	1.0632	0.997154	0	0.998391	1.00152
E2QUI7	E2QUI7	tr|E2QUI7|E2QUI7_CANLF EPS8 like 1 OS=Canis lupus familiaris GN=EPS8L1 PE=4 SV=2	1	13	13	13	25.5	78.583	710	39.748	1813300000	1.02728	1.05538	1.01222	1.10597	0.978203	1.0483	0.764362	0.988001
E2QUJ4;E2R7S0	E2QUJ4;E2R7S0	tr|E2QUJ4|E2QUJ4_CANLF Uncharacterized protein OS=Canis lupus familiaris GN=NUDT21 PE=4 SV=1;tr|E2R7S0|E2R7S0_CANLF Uncharacterized protein OS=Canis lupus familiaris PE=4 SV=2	2	6	6	6	26.4	26.24	227	19.752	1591000000	0.934361	0.882665	1.06177	1.00054	1.14951	1.00306	0.27579	0.912998
E2QUJ8	E2QUJ8	tr|E2QUJ8|E2QUJ8_CANLF Growth hormone inducible transmembrane protein OS=Canis lupus familiaris GN=GHITM PE=3 SV=1	1	6	6	6	14.2	37.264	345	13.508	1900900000	0.966909	0.983918	1.05521	0.994925	1.08113	1.10895	0.243968	0.94381
E2QUL2	E2QUL2	tr|E2QUL2|E2QUL2_CANLF Vesicle associated membrane protein 8 OS=Canis lupus familiaris GN=VAMP8 PE=4 SV=2	1	4	4	4	38.6	11.548	101	9.3549	2110200000	1.00145	1.0643	1.0879	1.02631	1.01916	1.08433	0.821558	1.00762
E2QUQ0	E2QUQ0	tr|E2QUQ0|E2QUQ0_CANLF Actinin alpha 2 OS=Canis lupus familiaris GN=ACTN2 PE=4 SV=2	1	14	1	1	16.1	103.78	894	-2	2306400000	0.976448	1.08205	1.1405	1.10513	1.03075	1.11362	0.773834	0.984459
E2QUQ3	E2QUQ3	tr|E2QUQ3|E2QUQ3_CANLF CTP synthase OS=Canis lupus familiaris GN=CTPS1 PE=3 SV=1	1	7	7	5	14.6	66.707	591	20.616	537850000	1.08537	1.05172	1.11782	0.911254	0.919551	1.01957	0.0273486	1.14192
E2QUQ8;J9P135;J9NU08	E2QUQ8;J9P135;J9NU08	tr|E2QUQ8|E2QUQ8_CANLF YTH N6-methyladenosine RNA binding protein 3 OS=Canis lupus familiaris GN=YTHDF3 PE=4 SV=2;tr|J9P135|J9P135_CANLF YTH N6-methyladenosine RNA binding protein 3 OS=Canis lupus familiaris GN=YTHDF3 PE=4 SV=1;tr|J9NU08|J9NU08_CANLF YTH N	3	7	5	2	13.8	63.754	585	11.94	455270000	0.942016	0.914647	0.921728	1.06143	1.05049	1.06856	0.000161575	0.873577
E2QUR2	E2QUR2	tr|E2QUR2|E2QUR2_CANLF Glutamyl-prolyl-tRNA synthetase OS=Canis lupus familiaris GN=EPRS PE=3 SV=1	1	47	47	46	38	169.86	1509	228.05	18358000000	1.07573	1.03957	1.09272	1.01029	1.04205	1.03499	0.0940122	1.03909
E2QUR8	E2QUR8	tr|E2QUR8|E2QUR8_CANLF Myosin VI OS=Canis lupus familiaris GN=MYO6 PE=3 SV=2	1	17	17	17	14.3	145.3	1253	43.829	1234100000	0.89979	1.16365	0.855628	1.10312	1.00688	1.11996	0.368826	0.903749
E2QUS9;J9P3C8	E2QUS9;J9P3C8	tr|E2QUS9|E2QUS9_CANLF Coenzyme Q10B OS=Canis lupus familiaris GN=COQ10B PE=3 SV=2;tr|J9P3C8|J9P3C8_CANLF Heat shock protein family E (Hsp10) member 1 OS=Canis lupus familiaris GN=HSPE1 PE=3 SV=1	2	7	7	7	67.6	10.928	102	24.322	82302000000	0.884209	0.878581	0.928208	1.03005	0.98386	0.887589	0.192357	0.927452
E2QUT2	E2QUT2	tr|E2QUT2|E2QUT2_CANLF ERGIC and golgi 2 OS=Canis lupus familiaris GN=ERGIC2 PE=4 SV=2	1	2	2	2	5.3	42.481	377	4.6751	540980000	0.887247	0.758212	0.908532	0.994142	0.464514	1.09695	0.997995	0.999368
E2QUT6	E2QUT6	tr|E2QUT6|E2QUT6_CANLF Uncharacterized protein OS=Canis lupus familiaris PE=4 SV=1	1	3	3	3	9.5	59.154	524	16.028	208490000	0.925607	0	1.01948	1.01181	0	1.07807	0.924272	0.930717
E2QUT9	E2QUT9	tr|E2QUT9|E2QUT9_CANLF Gamma-glutamyl hydrolase OS=Canis lupus familiaris GN=GGH PE=4 SV=2	1	10	10	10	33.6	35.613	318	52.485	2917700000	0.95349	1.01777	1.10105	1.00912	0.964981	1.04965	0.758746	1.01606
E2QUU0	E2QUU0	tr|E2QUU0|E2QUU0_CANLF Thyroid hormone receptor interactor 11 OS=Canis lupus familiaris GN=TRIP11 PE=4 SV=2	1	8	8	8	4.6	227.52	1977	25.585	300750000	0.913045	1.08161	0.932558	1.06112	1.11794	1.09664	0.105614	0.893614
E2QUU1	E2QUU1	tr|E2QUU1|E2QUU1_CANLF Eukaryotic translation initiation factor 3 subunit J OS=Canis lupus familiaris GN=EIF3J PE=3 SV=1	1	5	5	5	18.1	29.136	259	11.495	2325000000	1.07541	1.20173	1.03469	1.0947	1.01248	0.958605	0.26918	1.08026
E2QUU5;J9NV23;J9PB46;J9NYE6;J9PAK1	E2QUU5	tr|E2QUU5|E2QUU5_CANLF 60 kDa heat shock protein, mitochondrial OS=Canis lupus familiaris GN=HSPD1 PE=3 SV=2	5	29	29	29	61.6	60.995	573	323.31	211000000000	0.924884	0.934248	0.994171	0.970066	1.0255	0.967383	0.27334	0.962995
J9NZ80;E2QUV4	J9NZ80;E2QUV4	tr|J9NZ80|J9NZ80_CANLF SCY1 like pseudokinase 1 OS=Canis lupus familiaris GN=SCYL1 PE=4 SV=1;tr|E2QUV4|E2QUV4_CANLF SCY1 like pseudokinase 1 OS=Canis lupus familiaris GN=SCYL1 PE=4 SV=2	2	3	3	3	5.4	78.774	738	5.1768	84387000	1.06357	1.3154	1.27224	1.09039	0.940654	1.21588	0.292405	1.12451
E2QUV8	E2QUV8	tr|E2QUV8|E2QUV8_CANLF ATP-dependent Clp protease proteolytic subunit OS=Canis lupus familiaris GN=CLPP PE=3 SV=2	1	4	4	4	18.9	32.62	301	18.08	917730000	0.943906	1.03031	1.05857	0.849521	0.887034	0.934422	0.0464796	1.13546
E2QUY7	E2QUY7	tr|E2QUY7|E2QUY7_CANLF Proteasome 26S subunit, non-ATPase 3 OS=Canis lupus familiaris GN=PSMD3 PE=4 SV=2	1	23	23	23	42.3	60.966	534	78.363	7598700000	1.04118	1.02346	1.02917	1.0853	1.01613	1.0465	0.432371	0.982807
E2QV13	E2QV13	tr|E2QV13|E2QV13_CANLF Choline/ethanolamine phosphotransferase 1 OS=Canis lupus familiaris GN=CEPT1 PE=3 SV=1	1	2	2	2	4.8	46.43	416	5.6722	149560000	1.3554	0	0.898936	0.996532	0	1.17385	0.961178	1.03868
E2QV23	E2QV23	tr|E2QV23|E2QV23_CANLF ADP ribosylation factor interacting protein 2 OS=Canis lupus familiaris GN=ARFIP2 PE=4 SV=1	1	1	1	1	3.2	37.74	341	2.1619	36430000	1.1863	0	1.31696	0.889865	0	0.980586	0.707255	1.33832
E2QV28	E2QV28	tr|E2QV28|E2QV28_CANLF NADH:ubiquinone oxidoreductase subunit B7 OS=Canis lupus familiaris GN=NDUFB7 PE=4 SV=1	1	4	4	4	41.6	16.203	137	32.189	1179400000	1.044	1.13394	1.02549	0.974671	0.972475	1.02635	0.112767	1.07733
E2QV35	E2QV35	tr|E2QV35|E2QV35_CANLF Uncharacterized protein OS=Canis lupus familiaris GN=SURF6 PE=4 SV=1	1	3	3	2	9.3	40.794	353	4.7199	34286000	0.981859	0	1.03895	0.930998	0	1.12829	0.980149	0.981315
E2RKN8;E2QV38	E2RKN8;E2QV38	tr|E2RKN8|E2RKN8_CANLF Uncharacterized protein OS=Canis lupus familiaris GN=TMEM258 PE=4 SV=1;tr|E2QV38|E2QV38_CANLF Uncharacterized protein OS=Canis lupus familiaris PE=4 SV=1	2	1	1	1	10.1	9.0187	79	2.0353	282820000	1.02542	1.11323	1.2534	1.1448	0.948253	1.50192	0.718974	0.943552
E2QV49	E2QV49	tr|E2QV49|E2QV49_CANLF ATP synthase, H+ transporting, mitochondrial Fo complex subunit E OS=Canis lupus familiaris GN=ATP5I PE=4 SV=1	1	3	3	3	26.8	8.2624	71	7.61	2580900000	0.824302	0.871215	1.04549	0.993339	1.00473	1.05904	0.208139	0.896599
E2QVB5;J9P7U8	E2QVB5;J9P7U8	tr|E2QVB5|E2QVB5_CANLF Peptidyl-prolyl cis-trans isomerase E OS=Canis lupus familiaris GN=PPIE PE=3 SV=1;tr|J9P7U8|J9P7U8_CANLF Peptidylprolyl isomerase E OS=Canis lupus familiaris GN=PPIE PE=4 SV=1	2	4	3	3	14.6	33.416	301	6.6443	100840000	1.09692	0	1.01137	1.05995	0	1.08812	0.980205	0.981482
E2QVF4	E2QVF4	tr|E2QVF4|E2QVF4_CANLF MNAT1, CDK activating kinase assembly factor OS=Canis lupus familiaris GN=MNAT1 PE=4 SV=1	1	3	3	3	11	35.804	309	6.0466	53310000	0	1.09474	0.592805	0	0.654901	0.554505	0.693649	1.39535
E2QVF9;J9P2U1	E2QVF9	tr|E2QVF9|E2QVF9_CANLF Uncharacterized protein OS=Canis lupus familiaris GN=AIMP2 PE=4 SV=1	2	10	10	10	35.6	35.298	320	53.631	2404100000	1.08312	1.04068	1.02983	1.01883	0.976015	0.950838	0.053998	1.07059
E2QVK0	E2QVK0	tr|E2QVK0|E2QVK0_CANLF Acid phosphatase 6, lysophosphatidic OS=Canis lupus familiaris GN=ACP6 PE=3 SV=1	1	5	5	5	12.6	48.55	427	33.137	3274700000	0.793464	0.906922	0.922258	0.951862	0.992044	1.0609	0.0690676	0.872817
E2QVM3	E2QVM3	tr|E2QVM3|E2QVM3_CANLF Glyoxylate reductase 1 homolog OS=Canis lupus familiaris GN=GLYR1 PE=4 SV=1	1	4	4	4	8.5	62.968	575	9.8925	370080000	1.05012	0.868566	0	1.03226	1.01602	0	0.931291	0.93673
E2QVN6	E2QVN6	tr|E2QVN6|E2QVN6_CANLF Transcription elongation factor A1 OS=Canis lupus familiaris GN=TCEA1 PE=4 SV=1	1	6	6	6	23.3	33.854	301	22.872	161460000	1.15272	1.15975	1.17931	0.932802	1.04798	0.977984	0.00670044	1.18015
E2QVP0	E2QVP0	tr|E2QVP0|E2QVP0_CANLF Phospholipase D family member 3 OS=Canis lupus familiaris GN=PLD3 PE=4 SV=1	1	2	2	2	3.9	54.692	490	3.1391	186770000	1.0461	1.02229	0.969816	1.04661	0.961222	1.03442	0.971061	0.998671
E2QVV3	E2QVV3	tr|E2QVV3|E2QVV3_CANLF EBNA1 binding protein 2 OS=Canis lupus familiaris GN=EBNA1BP2 PE=4 SV=1	1	8	8	8	23.6	34.658	305	13.852	1230900000	0.963416	1.00456	0.732203	1.02459	1.1564	0.871341	0.376858	0.884631
E2QVV4	E2QVV4	tr|E2QVV4|E2QVV4_CANLF Transmembrane protein 199 OS=Canis lupus familiaris GN=TMEM199 PE=4 SV=1	1	3	3	3	17.3	23.066	208	8.2292	97758000	0.853234	1.03101	0.872206	1.01604	1.27246	1.17946	0.0647267	0.794834
E2QVV7	E2QVV7	tr|E2QVV7|E2QVV7_CANLF Polymerase (DNA) delta interacting protein 2 OS=Canis lupus familiaris GN=POLDIP2 PE=4 SV=1	1	5	5	5	13	41.806	368	17.079	995170000	0.836427	0.833431	0.531	1.00695	1.06999	0.616543	0.399449	0.817104
E2QW06	E2QW06	tr|E2QW06|E2QW06_CANLF ATP synthase, H+ transporting, mitochondrial Fo complex subunit B1 OS=Canis lupus familiaris GN=ATP5F1 PE=4 SV=1	1	9	9	9	33.6	28.806	256	48.013	21710000000	0.914208	0.88795	0.978076	1.00431	1.05888	1.16368	0.0506757	0.861586
E2QW07;F1PZP8	E2QW07;F1PZP8	tr|E2QW07|E2QW07_CANLF ERGIC and golgi 3 OS=Canis lupus familiaris GN=ERGIC3 PE=4 SV=2;tr|F1PZP8|F1PZP8_CANLF ERGIC and golgi 3 OS=Canis lupus familiaris GN=ERGIC3 PE=4 SV=2	2	3	3	3	7.6	43.393	383	5.0029	306640000	0.961902	0	0.481256	0.934334	0	0.401785	0.931104	1.08011
E2QW25	E2QW25	tr|E2QW25|E2QW25_CANLF Mitochondrial ribosomal protein S26 OS=Canis lupus familiaris GN=MRPS26 PE=4 SV=1	1	3	3	3	16	23.975	206	7.7947	142870000	1.13732	0	1.23242	0.856587	0	1.06426	0.7849	1.23369
E2QW34	E2QW34	tr|E2QW34|E2QW34_CANLF Proteasome subunit beta type OS=Canis lupus familiaris GN=PSMB2 PE=3 SV=1	1	4	4	4	21.4	22.781	201	9.5259	750350000	1.09521	1.21598	0.983353	0.946285	0.972276	0.894166	0.0864439	1.1713
E2QW49	E2QW49	tr|E2QW49|E2QW49_CANLF Uncharacterized protein OS=Canis lupus familiaris GN=PA2G4 PE=4 SV=1	1	15	15	15	39.8	43.802	394	68.561	14513000000	1.02027	1.05157	1.0172	1.1032	1.10177	1.03779	0.101707	0.952597
E2QW54	E2QW54	tr|E2QW54|E2QW54_CANLF LIM domain and actin binding 1 OS=Canis lupus familiaris GN=LIMA1 PE=4 SV=2	1	23	23	23	39.4	85.06	762	147.33	4523700000	0.973809	1.00898	0.625041	1.03801	1.11682	0.647513	0.749987	0.93059
E2QW60	E2QW60	tr|E2QW60|E2QW60_CANLF Lectin, mannose binding 1 OS=Canis lupus familiaris GN=LMAN1 PE=4 SV=2	1	7	7	7	21.2	58.059	518	52.813	3715500000	0.987274	0.825005	0.944847	0.967953	1.08853	0.989329	0.190737	0.905217
E2QW69	E2QW69	tr|E2QW69|E2QW69_CANLF RAB5B, member RAS oncogene family OS=Canis lupus familiaris GN=RAB5B PE=4 SV=1	1	7	5	5	49.8	23.707	215	116.89	4478400000	0.986579	0.983994	0.98124	0.924701	0.939615	0.982526	0.114688	1.03687
E2QW80	E2QW80	tr|E2QW80|E2QW80_CANLF Diacylglycerol kinase OS=Canis lupus familiaris GN=DGKA PE=3 SV=2	1	4	4	4	7.9	82.502	734	26.186	459120000	1.1279	1.16795	1.26646	1.11185	0.902944	1.12781	0.168452	1.13355
J9PBL2;E2QW92;E2R4H9;F1P6F3	J9PBL2;E2QW92;E2R4H9	tr|J9PBL2|J9PBL2_CANLF Bromodomain containing 4 OS=Canis lupus familiaris GN=BRD4 PE=4 SV=1;tr|E2QW92|E2QW92_CANLF Bromodomain containing 4 OS=Canis lupus familiaris GN=BRD4 PE=4 SV=2;tr|E2R4H9|E2R4H9_CANLF Uncharacterized protein OS=Canis lupus familiaris	4	3	3	3	3.5	80.445	722	5.041	280280000	0.95632	0.856344	0.891224	0.948427	0.864244	0.958722	0.619553	0.975642
E2QW97;E2RAS7	E2QW97;E2RAS7	tr|E2QW97|E2QW97_CANLF Uncharacterized protein OS=Canis lupus familiaris GN=ORMDL2 PE=4 SV=1;tr|E2RAS7|E2RAS7_CANLF ORMDL sphingolipid biosynthesis regulator 1 OS=Canis lupus familiaris GN=ORMDL1 PE=4 SV=1	2	3	3	2	22.2	17.375	153	12.769	960160000	0.751358	0.955713	0.911174	1.04214	0.924384	1.20394	0.145622	0.825824
E2QWD0;E2QWB0;J9P0I9;E2QU91	E2QWD0;E2QWB0	tr|E2QWD0|E2QWD0_CANLF CAP-Gly domain containing linker protein 1 OS=Canis lupus familiaris GN=CLIP1 PE=4 SV=2;tr|E2QWB0|E2QWB0_CANLF CAP-Gly domain containing linker protein 1 OS=Canis lupus familiaris GN=CLIP1 PE=4 SV=2	4	6	6	6	4.9	161.55	1438	24.156	191890000	0.876556	1.04248	0.701547	1.05234	0.908554	0.839512	0.634587	0.935789
E2QWB2	E2QWB2	tr|E2QWB2|E2QWB2_CANLF Plastin 1 OS=Canis lupus familiaris GN=PLS1 PE=4 SV=2	1	9	7	7	17.5	70.37	629	19.575	276640000	1.21356	1.04861	1.31236	1.06731	0.884869	0.979998	0.0832672	1.21907
E2QWC9	E2QWC9	tr|E2QWC9|E2QWC9_CANLF Methylcrotonoyl-CoA carboxylase 2 OS=Canis lupus familiaris GN=MCCC2 PE=4 SV=2	1	7	7	7	14.9	61.552	563	30.544	1945500000	1.05083	1.06102	1.03585	0.937142	0.899974	1.03725	0.0938971	1.09509
E2QWD3	E2QWD3	tr|E2QWD3|E2QWD3_CANLF CRK proto-oncogene, adaptor protein OS=Canis lupus familiaris GN=CRK PE=4 SV=2	1	4	4	4	11.4	42.069	385	10.314	330680000	1.1004	1.1096	1.06292	1.13071	0.915185	0.828046	0.218027	1.13883
E2QWE0	E2QWE0	tr|E2QWE0|E2QWE0_CANLF COP9 signalosome subunit 5 OS=Canis lupus familiaris GN=COPS5 PE=4 SV=1	1	3	3	2	8.7	37.564	334	28.77	467490000	1.16721	1.124	1.18909	1.01238	0.790048	1.07457	0.0853951	1.2097
E2QWE3	E2QWE3	tr|E2QWE3|E2QWE3_CANLF Hepatocyte growth factor-regulated tyrosine kinase substrate OS=Canis lupus familiaris GN=HGS PE=4 SV=2	1	4	4	4	4.6	86.022	782	5.5775	142960000	1.14869	0	1.09796	1.05228	0	1.01021	0.909761	1.08929
J9NRJ3;L7N0B1;J9PAP2;J9P0U8;H9GWG6;F1PH35;E2R5M3;E2QWF8;L7N0I3;J9NTE7;L7N065;E2QSD1;E2RLG6;E2QUM5	J9NRJ3;L7N0B1;J9PAP2;J9P0U8;H9GWG6;F1PH35;E2R5M3;E2QWF8;L7N0I3;J9NTE7;L7N065;E2QSD1	tr|J9NRJ3|J9NRJ3_CANLF 40S ribosomal protein S24 OS=Canis lupus familiaris GN=LOC106557831 PE=3 SV=1;tr|L7N0B1|L7N0B1_CANLF 40S ribosomal protein S24 OS=Canis lupus familiaris GN=LOC106557831 PE=3 SV=1;tr|J9PAP2|J9PAP2_CANLF 40S ribosomal protein S24 OS=Ca	14	4	4	4	31.5	15.069	130	14.167	12383000000	1.04365	0.967864	1.1134	0.93849	1.1586	1.00501	0.926579	1.00736
E2R158;E2QWG3	E2R158;E2QWG3	tr|E2R158|E2R158_CANLF Protein phosphatase, Mg2+/Mn2+ dependent 1A OS=Canis lupus familiaris GN=PPM1A PE=3 SV=2;tr|E2QWG3|E2QWG3_CANLF Protein phosphatase, Mg2+/Mn2+ dependent 1A OS=Canis lupus familiaris GN=PPM1A PE=3 SV=2	2	2	2	2	7.9	42.445	382	10.744	185080000	1.18737	1.27438	0.933116	1.36405	0.908494	1.31273	0.737665	0.946892
E2QWG8	E2QWG8	tr|E2QWG8|E2QWG8_CANLF Eukaryotic translation initiation factor 3 subunit M OS=Canis lupus familiaris GN=EIF3M PE=3 SV=1	1	6	6	6	20.1	42.502	374	38.141	2790600000	0.997665	0.931537	0.994759	1.17685	1.12259	1.18081	0.0029188	0.840159
E2QWH0	E2QWH0	tr|E2QWH0|E2QWH0_CANLF Family with sequence similarity 207 member A OS=Canis lupus familiaris GN=FAM207A PE=4 SV=2	1	2	2	2	11	24.094	219	4.6884	73817000	1.15489	0	1.08992	1.23619	0	1.29233	0.874991	0.887796
E2QWJ2	E2QWJ2	tr|E2QWJ2|E2QWJ2_CANLF Golgin A5 OS=Canis lupus familiaris GN=GOLGA5 PE=4 SV=1	1	11	11	11	19.6	83.09	731	29.598	773330000	1.00925	1.05016	0.927629	0.988897	0.899948	1.06823	0.876838	1.01014
J9P5T7;E2QWJ6	J9P5T7;E2QWJ6	tr|J9P5T7|J9P5T7_CANLF Protein phosphatase 1 regulatory subunit 12A OS=Canis lupus familiaris GN=PPP1R12A PE=4 SV=1;tr|E2QWJ6|E2QWJ6_CANLF Protein phosphatase 1 regulatory subunit 12A OS=Canis lupus familiaris GN=PPP1R12A PE=4 SV=2	2	13	13	13	13.1	115.21	1029	24.917	778260000	1.03142	1.21806	1.04127	1.02388	0.964832	1.06451	0.303969	1.07779
E2QWK2	E2QWK2	tr|E2QWK2|E2QWK2_CANLF Polyribonucleotide nucleotidyltransferase 1 OS=Canis lupus familiaris GN=PNPT1 PE=4 SV=2	1	15	15	15	20.4	87.399	789	37.981	2673200000	0.909297	0.890038	0.900725	0.948626	0.987549	0.99968	0.00865084	0.919684
E2QWK3	E2QWK3	tr|E2QWK3|E2QWK3_CANLF Dehydrogenase/reductase 7 OS=Canis lupus familiaris GN=DHRS7 PE=3 SV=1	1	3	3	3	8.3	38.361	339	6.4322	433070000	0.945346	1.06602	0.92131	0.931149	0.855698	1.04514	0.660932	1.03555
F1PCG5;E2QWK6	F1PCG5;E2QWK6	tr|F1PCG5|F1PCG5_CANLF YTH N6-methyladenosine RNA binding protein 2 OS=Canis lupus familiaris GN=YTHDF2 PE=4 SV=2;tr|E2QWK6|E2QWK6_CANLF YTH N6-methyladenosine RNA binding protein 2 OS=Canis lupus familiaris GN=YTHDF2 PE=4 SV=2	2	9	9	6	19.1	56.978	530	24.509	1335500000	0.972164	1.01522	1.01075	1.00984	1.13228	1.02418	0.243258	0.946887
E2QWK8	E2QWK8	tr|E2QWK8|E2QWK8_CANLF NOP16 nucleolar protein OS=Canis lupus familiaris GN=NOP16 PE=4 SV=2	1	3	3	3	12.4	21.188	178	2.9988	278840000	0.878361	0.9186	0	1.12197	0.96297	0	0.845282	0.861876
E2QWL1;E2R1C9;E2QXQ9	E2QWL1	tr|E2QWL1|E2QWL1_CANLF Tropomodulin 3 OS=Canis lupus familiaris GN=TMOD3 PE=4 SV=1	3	14	14	14	39.5	39.66	352	38.842	3735400000	0.921792	0.989984	1.01854	1.0798	0.977944	1.08857	0.189901	0.931348
E2QWL4	E2QWL4	tr|E2QWL4|E2QWL4_CANLF B-TFIID TATA-box binding protein associated factor 1 OS=Canis lupus familiaris GN=BTAF1 PE=4 SV=2	1	2	2	2	1.2	210.38	1879	4.4695	87592000	1.02726	0	0.826093	1.07998	0	1.11215	0.826276	0.845455
E2QWM9	E2QWM9	tr|E2QWM9|E2QWM9_CANLF Ubiquitin carboxyl-terminal hydrolase OS=Canis lupus familiaris GN=UCHL5 PE=3 SV=1	1	6	6	6	28.3	37.603	329	35.108	1698000000	0.982705	1.07126	0.999542	1.0991	1.12527	1.15236	0.0259841	0.904281
E2QWN4	E2QWN4	tr|E2QWN4|E2QWN4_CANLF N-acetylneuraminate synthase OS=Canis lupus familiaris GN=NANS PE=4 SV=1	1	5	5	5	17.8	40.246	359	20.699	450880000	1.06966	1.17383	1.1282	0.974087	0.909049	0.992519	0.0136961	1.1725
E2QWR3	E2QWR3	tr|E2QWR3|E2QWR3_CANLF Regulator of chromosome condensation 2 OS=Canis lupus familiaris GN=RCC2 PE=4 SV=2	1	8	8	8	23	46.563	427	35.944	1867700000	0.986354	1.0195	1.06076	1.03054	1.12514	1.19098	0.142918	0.916322
E2QWR5;J9P9U3	E2QWR5	tr|E2QWR5|E2QWR5_CANLF DnaJ heat shock protein family (Hsp40) member C7 OS=Canis lupus familiaris GN=DNAJC7 PE=4 SV=1	2	8	8	8	16.4	56.293	494	11.589	604720000	1.14873	1.08967	0.897204	1.05244	0.998083	0.798152	0.427323	1.10072
E2QWR7;J9NWN3	E2QWR7;J9NWN3	tr|E2QWR7|E2QWR7_CANLF Uncharacterized protein OS=Canis lupus familiaris GN=VIMP PE=4 SV=2;tr|J9NWN3|J9NWN3_CANLF Uncharacterized protein OS=Canis lupus familiaris GN=VIMP PE=4 SV=1	2	1	1	1	7.1	19.428	170	4.8816	39067000	1.04926	1.28257	0	0.970746	1.06268	0	0.857813	1.14675
E2QWR9	E2QWR9	tr|E2QWR9|E2QWR9_CANLF ADP ribosylation factor guanine nucleotide exchange factor 1 OS=Canis lupus familiaris GN=ARFGEF1 PE=4 SV=2	1	3	3	2	2.4	208.83	1849	13.299	52157000	0.941298	0	1.11127	0.972197	0	1.22503	0.929053	0.934163
E2QWS2	E2QWS2	tr|E2QWS2|E2QWS2_CANLF RAB23, member RAS oncogene family OS=Canis lupus familiaris GN=RAB23 PE=4 SV=2	1	3	3	3	15.2	26.762	237	8.4132	233010000	0.718386	0	0.652423	1.08066	0	1.4299	0.479453	0.546016
E2QWT2	E2QWT2	tr|E2QWT2|E2QWT2_CANLF RNA exonuclease 2 OS=Canis lupus familiaris GN=REXO2 PE=3 SV=2	1	1	1	1	4.2	26.692	236	2.7083	44565000	0	1.67504	1.13314	0	0.700431	0.851592	0.49538	1.80937
E2QWU0	E2QWU0	tr|E2QWU0|E2QWU0_CANLF Actin-related protein 2/3 complex subunit 4 OS=Canis lupus familiaris GN=ARPC4 PE=3 SV=2	1	4	4	4	29.3	19.517	167	55.175	9312000000	1.15347	1.08107	1.14088	1.04404	1.05602	1.07517	0.050396	1.06305
E2QWU2	E2QWU2	tr|E2QWU2|E2QWU2_CANLF Small nuclear ribonucleoprotein polypeptide A OS=Canis lupus familiaris GN=SNRPA1 PE=4 SV=1	1	8	8	8	35.7	28.415	255	23.404	2860000000	0.934972	0.946845	0.904378	1.04142	1.0818	1.14798	0.00851857	0.851735
E2QWX5	E2QWX5	tr|E2QWX5|E2QWX5_CANLF Trafficking protein particle complex subunit OS=Canis lupus familiaris GN=TRAPPC3 PE=3 SV=1	1	1	1	1	7.2	20.318	180	8.2453	162930000	0	1.16977	1.21731	0	0.950909	0.936537	0.759194	1.26472
E2QWY5	E2QWY5	tr|E2QWY5|E2QWY5_CANLF NADH:ubiquinone oxidoreductase subunit B10 OS=Canis lupus familiaris GN=NDUFB10 PE=4 SV=1	1	7	7	7	45.5	20.934	176	36.428	4856700000	0.96866	1.05398	0.923075	0.978407	0.958049	1.00334	0.963521	1.00201
E2QWY6;J9P0D3;E2QWF1;F1PW41;J9PAX1	E2QWY6	tr|E2QWY6|E2QWY6_CANLF Uncharacterized protein OS=Canis lupus familiaris GN=RPS2 PE=3 SV=2	5	12	12	12	43.3	31.249	293	48.142	46984000000	0.988911	1.01238	1.00333	1.0993	1.08279	1.13405	0.00331438	0.906059
E2QX17;J9NTB8	E2QX17	tr|E2QX17|E2QX17_CANLF Proteasome subunit beta type OS=Canis lupus familiaris GN=PSMB3 PE=3 SV=1	2	6	6	6	38.5	22.979	205	60.036	3385400000	1.27796	0.808259	1.11975	1.0295	1.25301	0.92502	0.997671	0.999511
E2QX20	E2QX20	tr|E2QX20|E2QX20_CANLF Thioredoxin interacting protein OS=Canis lupus familiaris GN=TXNIP PE=4 SV=1	1	3	3	3	7.2	43.682	391	6.6149	149190000	0.89469	0	0.655711	1.1438	0	0.779266	0.787261	0.806214
E2QX33	E2QX33	tr|E2QX33|E2QX33_CANLF Coiled-coil and C2 domain containing 1A OS=Canis lupus familiaris GN=CC2D1A PE=4 SV=1	1	3	3	3	4.6	104.23	951	4.7813	141150000	1.03608	1.05583	1.18333	1.11637	0.98092	1.32511	0.679337	0.957001
E2QX45	E2QX45	tr|E2QX45|E2QX45_CANLF A-kinase anchoring protein 8 like OS=Canis lupus familiaris GN=AKAP8L PE=3 SV=2	1	2	2	2	3.9	78.564	712	6.1615	185060000	0.935602	0.950328	0	0.986056	1.00733	0	0.941345	0.946094
E2QX49;F1PWW9	E2QX49;F1PWW9	tr|E2QX49|E2QX49_CANLF Pleckstrin homology and RhoGEF domain containing G3 OS=Canis lupus familiaris GN=PLEKHG3 PE=4 SV=2;tr|F1PWW9|F1PWW9_CANLF Pleckstrin homology and RhoGEF domain containing G3 OS=Canis lupus familiaris GN=PLEKHG3 PE=4 SV=2	2	6	6	6	6.1	133.74	1214	35.819	540420000	0.915646	1.00948	0.863201	1.12235	0.910262	1.15358	0.204587	0.87513
E2QX53;E2RH59	E2QX53	tr|E2QX53|E2QX53_CANLF Glucosamine-6-phosphate isomerase OS=Canis lupus familiaris GN=GNPDA1 PE=3 SV=1	2	4	4	4	13.1	32.603	289	6.9929	188980000	0	1.07822	1.26133	0	1.01295	0.881735	0.784032	1.2348
E2QX57;F1P7Z9	E2QX57;F1P7Z9	tr|E2QX57|E2QX57_CANLF Phosphoinositide phospholipase C OS=Canis lupus familiaris GN=PLCD1 PE=4 SV=1;tr|F1P7Z9|F1P7Z9_CANLF Phosphoinositide phospholipase C OS=Canis lupus familiaris GN=PLCD1 PE=4 SV=2	2	4	4	3	6.2	88.279	777	11.075	275690000	1.08159	1.24825	1.0798	1.07532	1.05848	0.975571	0.191752	1.09657
E2QX76	E2QX76	tr|E2QX76|E2QX76_CANLF Centrosomal protein 55 OS=Canis lupus familiaris GN=CEP55 PE=4 SV=1	1	4	4	4	8.9	54.062	462	7.9463	251950000	1.06366	1.07447	1.00375	0.996455	1.0758	1.15849	0.597243	0.972491
E2QX84	E2QX84	tr|E2QX84|E2QX84_CANLF Uncharacterized protein OS=Canis lupus familiaris GN=HSPA2 PE=3 SV=1	1	13	5	5	24.8	69.883	637	12.17	69662000	1.34279	0.818206	0	0.971607	0.947644	0	0.880953	1.12596
E2QX90	E2QX90	tr|E2QX90|E2QX90_CANLF Uncharacterized protein OS=Canis lupus familiaris PE=4 SV=2	1	2	2	2	1.1	219.51	1972	1.9586	50358000	0	0.838525	0.988451	0	0.85153	0.854736	0.928096	1.07074
E2QXA6;F1PX12	E2QXA6;F1PX12	tr|E2QXA6|E2QXA6_CANLF Calpastatin OS=Canis lupus familiaris GN=CAST PE=4 SV=2;tr|F1PX12|F1PX12_CANLF Calpastatin OS=Canis lupus familiaris GN=CAST PE=4 SV=2	2	24	24	24	41.1	83.746	781	282.03	8956700000	1.16433	1.14379	0.928362	0.951032	1.02863	0.791119	0.205834	1.16807
E2QXB5	E2QXB5	tr|E2QXB5|E2QXB5_CANLF Zinc finger CCHC-type containing 8 OS=Canis lupus familiaris GN=ZCCHC8 PE=4 SV=2	1	4	4	4	6.6	78.962	709	16.959	132680000	0.82523	1.06061	0.741043	1.10086	1.02195	1.38352	0.114319	0.749184
E2QXE0;Q8MJ46	E2QXE0;Q8MJ46	tr|E2QXE0|E2QXE0_CANLF Serine/threonine-protein phosphatase OS=Canis lupus familiaris GN=PPP1CC PE=3 SV=1;sp|Q8MJ46|PP1G_CANLF Serine/threonine-protein phosphatase PP1-gamma catalytic subunit OS=Canis lupus familiaris GN=PPP1CC PE=2 SV=1	2	9	2	2	32.9	38.548	337	3.7952	215700000	1.02625	1.10271	1.05237	1.20963	1.13314	1.21406	0.0222943	0.894427
E2QXF3	E2QXF3	sp|E2QXF3|RL15_CANLF 60S ribosomal protein L15 OS=Canis lupus familiaris GN=RPL15 PE=1 SV=1	1	13	13	13	47.5	24.146	204	31.574	19845000000	1.03642	0.983329	0.95492	0.895462	0.964243	0.989544	0.320366	1.04402
E2QXG1	E2QXG1	tr|E2QXG1|E2QXG1_CANLF Nucleoporin 88 OS=Canis lupus familiaris GN=NUP88 PE=4 SV=2	1	4	4	4	7.7	82.737	739	29.497	610230000	0.919253	1.05588	0.722079	1.02914	1.27156	0.772642	0.510118	0.877615
E2QXH2	E2QXH2	tr|E2QXH2|E2QXH2_CANLF Uncharacterized protein OS=Canis lupus familiaris GN=PSPC1 PE=4 SV=2	1	8	7	7	18.5	58.425	519	18.919	839420000	1.00617	0.989465	0.906694	0.961178	0.999154	0.647219	0.443521	1.11305
E2QXH3	E2QXH3	tr|E2QXH3|E2QXH3_CANLF Tubulointerstitial nephritis antigen like 1 OS=Canis lupus familiaris GN=TINAGL1 PE=3 SV=1	1	4	4	4	8.1	52.315	467	5.6518	164940000	0.901332	0.881501	0	1.15783	1.03884	0	0.784977	0.811609
E2QXI3;F1Q286	E2QXI3;F1Q286	tr|E2QXI3|E2QXI3_CANLF Uncharacterized protein OS=Canis lupus familiaris GN=AIMP1 PE=4 SV=2;tr|F1Q286|F1Q286_CANLF Uncharacterized protein OS=Canis lupus familiaris PE=4 SV=2	2	9	9	9	32.7	35.377	321	32.411	4212400000	1.0753	1.05239	1.08515	1.02284	1.01597	1.11137	0.552126	1.01989
E2QXJ4	E2QXJ4	tr|E2QXJ4|E2QXJ4_CANLF Protein YIPF OS=Canis lupus familiaris GN=YIPF4 PE=3 SV=1	1	2	2	2	7.4	27.098	244	5.6257	248000000	0.957252	0.925658	0.986516	1.00108	1.07511	1.10615	0.0434523	0.901674
E2QXJ5	E2QXJ5	tr|E2QXJ5|E2QXJ5_CANLF V-type proton ATPase subunit a OS=Canis lupus familiaris GN=TCIRG1 PE=3 SV=1	1	6	6	6	9	93.07	830	18.272	330260000	1.15481	1.04538	0.999472	0.941989	0.994195	0.910581	0.0870121	1.12396
E2QXL5;J9P024	E2QXL5;J9P024	tr|E2QXL5|E2QXL5_CANLF ER lumen protein-retaining receptor OS=Canis lupus familiaris GN=KDELR2 PE=3 SV=1;tr|J9P024|J9P024_CANLF ER lumen protein-retaining receptor OS=Canis lupus familiaris GN=KDELR2 PE=3 SV=1	2	2	2	2	9	24.454	212	8.2578	1562100000	0.831653	0.813069	0.989397	1.03277	1.08352	1.41574	0.0867578	0.745779
F1PT28;E2QXM6	F1PT28;E2QXM6	tr|F1PT28|F1PT28_CANLF Armadillo repeat containing 8 OS=Canis lupus familiaris GN=ARMC8 PE=4 SV=2;tr|E2QXM6|E2QXM6_CANLF Armadillo repeat containing 8 OS=Canis lupus familiaris GN=ARMC8 PE=4 SV=1	2	1	1	1	1.5	67.9	606	2.1905	27359000	0	1.24535	1.29709	0	0.8724	1.28149	0.830805	1.18039
J9P7X3;E2QXN9	J9P7X3;E2QXN9	tr|J9P7X3|J9P7X3_CANLF Uncharacterized protein OS=Canis lupus familiaris GN=CBS PE=4 SV=1;tr|E2QXN9|E2QXN9_CANLF Cystathionine beta-synthase OS=Canis lupus familiaris GN=CBS PE=3 SV=2	2	1	1	1	5	20.139	179	1.956	75605000	1.06411	1.25614	0	1.18582	1.13525	0	0.99963	0.999649
E2QXP4	E2QXP4	tr|E2QXP4|E2QXP4_CANLF Thymidine kinase OS=Canis lupus familiaris GN=TK1 PE=3 SV=1	1	1	1	1	4.1	26.45	242	1.9954	36541000	1.52887	0	1.45171	0.87427	0	0.889642	0.521354	1.68976
E2QXS5	E2QXS5	tr|E2QXS5|E2QXS5_CANLF Debranching RNA lariats 1 OS=Canis lupus familiaris GN=DBR1 PE=4 SV=1	1	2	2	2	4	61.663	544	3.7209	51022000	0	0.755997	1.12278	0	0.892793	1.14057	0.919473	0.923974
E2QXS7	E2QXS7	tr|E2QXS7|E2QXS7_CANLF Adenosylhomocysteinase OS=Canis lupus familiaris GN=AHCY PE=3 SV=2	1	12	12	12	31.4	47.749	433	65.966	6773000000	1.00609	1.06326	1.06556	1.09424	1.07488	1.16799	0.121636	0.939414
E2QXT3	E2QXT3	tr|E2QXT3|E2QXT3_CANLF Integrator complex subunit 5 OS=Canis lupus familiaris GN=INTS5 PE=4 SV=1	1	2	2	2	3.2	108.01	1019	11.015	46998000	1.13995	0	1.0244	0.805007	0	0.952537	0.786328	1.23146
E2QXT5	E2QXT5	tr|E2QXT5|E2QXT5_CANLF Uncharacterized protein OS=Canis lupus familiaris GN=C18H11orf98 PE=4 SV=2	1	2	2	2	16.8	14.389	125	4.4591	398210000	1.04494	1.02404	1.05354	0.991233	1.05184	1.17902	0.585385	0.969095
E2QXV1	E2QXV1	tr|E2QXV1|E2QXV1_CANLF Host cell factor C1 OS=Canis lupus familiaris GN=HCFC1 PE=4 SV=2	1	10	10	10	7.5	211.84	2067	43.081	1142300000	0.980896	1.25689	1.01581	1.0376	0.739911	0.885914	0.182499	1.22158
E2QXV5	E2QXV5	tr|E2QXV5|E2QXV5_CANLF Adaptor related protein complex 3 delta 1 subunit OS=Canis lupus familiaris GN=AP3D1 PE=4 SV=2	1	8	8	8	7.4	137.09	1216	18.659	997840000	1.09961	1.20938	1.09859	0.930603	0.693855	1.04084	0.0852582	1.2785
E2QXX0	E2QXX0	tr|E2QXX0|E2QXX0_CANLF Mitochondrial ribosomal protein L47 OS=Canis lupus familiaris GN=MRPL47 PE=4 SV=1	1	4	4	4	16.7	29.779	252	9.2995	327930000	0.920053	0.872213	1.04966	1.01889	0.981805	1.1336	0.236139	0.906717
E2QXX4;J9NWB3	E2QXX4;J9NWB3	tr|E2QXX4|E2QXX4_CANLF Exonuclease 3-5 domain containing 2 OS=Canis lupus familiaris GN=EXD2 PE=4 SV=2;tr|J9NWB3|J9NWB3_CANLF Exonuclease 3-5 domain containing 2 OS=Canis lupus familiaris GN=EXD2 PE=4 SV=1	2	6	6	6	11.7	70.857	623	18.791	176960000	0.746791	0.944413	0	0.98945	0.925213	0	0.87088	0.88329
E2QXY7	E2QXY7	tr|E2QXY7|E2QXY7_CANLF ARP2 actin related protein 2 homolog OS=Canis lupus familiaris GN=ACTR2 PE=3 SV=2	1	6	6	6	19.8	45.396	399	29.4	7824900000	1.04054	1.04128	1.0463	1.01677	0.966142	1.04126	0.19344	1.03437
E2QXZ1;J9P6E2	E2QXZ1;J9P6E2	tr|E2QXZ1|E2QXZ1_CANLF Splicing factor 3a subunit 2 OS=Canis lupus familiaris GN=SF3A2 PE=4 SV=2;tr|J9P6E2|J9P6E2_CANLF Splicing factor 3a subunit 2 OS=Canis lupus familiaris GN=SF3A2 PE=4 SV=1	2	6	6	6	14	48.64	463	21.611	1630100000	0.855181	0.788464	0.896216	0.958299	0.960909	0.946995	0.0264647	0.886141
E2QXZ2	E2QXZ2	tr|E2QXZ2|E2QXZ2_CANLF Squamous cell carcinoma antigen recognized by T-cells 3 OS=Canis lupus familiaris GN=SART3 PE=4 SV=2	1	11	11	11	10.4	123.35	1082	27.34	1123800000	0.862809	0.881824	0.778068	0.98226	0.931735	0.977781	0.0262563	0.872371
E2QY01	E2QY01	tr|E2QY01|E2QY01_CANLF U3 small nucleolar RNA-associated protein 11 OS=Canis lupus familiaris GN=UTP11 PE=3 SV=1	1	3	3	3	11.9	30.569	253	3.791	75612000	0.801188	0.898625	0	1.29577	1.30815	0	0.592639	0.652792
F1Q235;E2QY04	F1Q235;E2QY04	tr|F1Q235|F1Q235_CANLF Ras related GTP binding D OS=Canis lupus familiaris GN=RRAGD PE=4 SV=2;tr|E2QY04|E2QY04_CANLF Ras related GTP binding C OS=Canis lupus familiaris GN=RRAGC PE=4 SV=1	2	2	2	2	7.8	38.258	333	6.8961	82321000	0.99812	1.15284	0.797572	1.16301	0.968988	0.749248	0.893764	1.02335
E2QY18	E2QY18	tr|E2QY18|E2QY18_CANLF Transmembrane BAX inhibitor motif containing 6 OS=Canis lupus familiaris GN=TMBIM6 PE=3 SV=1	1	1	1	1	5.5	26.428	237	2.5395	210060000	0.881776	0.697121	0.839706	0.894867	1.11906	1.19605	0.0679648	0.753465
E2QY23;E2RNE6	E2QY23	tr|E2QY23|E2QY23_CANLF ER lipid raft associated 2 OS=Canis lupus familiaris GN=ERLIN2 PE=4 SV=1	2	12	12	12	42.1	37.628	337	39.903	3011300000	0.914702	0.931871	0.988599	1.01421	0.926321	1.08529	0.28163	0.936994
E2QY30	E2QY30	tr|E2QY30|E2QY30_CANLF High mobility group box 2 OS=Canis lupus familiaris GN=HMGB2 PE=4 SV=1	1	4	4	4	18.6	24.163	210	13.274	1553100000	1.08681	0.99083	0.880395	1.14592	1.01298	1.11624	0.215841	0.903178
E2QY36	E2QY36	tr|E2QY36|E2QY36_CANLF U6 small nuclear RNA (adenine-(43)-N(6))-methyltransferase OS=Canis lupus familiaris GN=METTL16 PE=3 SV=2	1	4	4	4	7.3	63.512	561	8.2215	397850000	1.0262	1.05871	1.18349	1.00437	1.01845	1.0026	0.168195	1.08031
E2QY43	E2QY43	tr|E2QY43|E2QY43_CANLF Proteasome 26S subunit, non-ATPase 8 OS=Canis lupus familiaris GN=PSMD8 PE=4 SV=2	1	7	7	7	18.5	39.574	351	16.902	1316900000	0.968914	1.12105	0.969479	1.06879	0.935898	1.04737	0.97169	1.00242
E2QY54	E2QY54	tr|E2QY54|E2QY54_CANLF Signal sequence receptor subunit 4 OS=Canis lupus familiaris GN=SSR4 PE=4 SV=1	1	4	4	4	25.4	18.943	173	13.245	2931600000	0.839626	0.714283	0.930815	0.961857	0.975071	1.01865	0.07339	0.840689
E2R5X2;E2QY55	E2R5X2;E2QY55	tr|E2R5X2|E2R5X2_CANLF Isocitrate dehydrogenase [NAD] subunit, mitochondrial OS=Canis lupus familiaris GN=IDH3G PE=3 SV=1;tr|E2QY55|E2QY55_CANLF Isocitrate dehydrogenase [NAD] subunit, mitochondrial OS=Canis lupus familiaris GN=IDH3G PE=3 SV=2	2	5	5	5	15.6	42.894	392	22.16	1089400000	1.09179	1.05422	1.0487	1.01437	0.739891	0.979522	0.153339	1.1686
E2QY58	E2QY58	tr|E2QY58|E2QY58_CANLF Polypeptide N-acetylgalactosaminyltransferase OS=Canis lupus familiaris GN=GALNT3 PE=3 SV=1	1	2	2	1	2.7	72.744	632	3.1678	47112000	0	1.21033	1.0532	0	0.857322	1.29046	0.946152	1.05389
E2QY79;J9P5D7	E2QY79;J9P5D7	tr|E2QY79|E2QY79_CANLF Nuclear VCP-like OS=Canis lupus familiaris GN=NVL PE=4 SV=2;tr|J9P5D7|J9P5D7_CANLF Nuclear VCP-like OS=Canis lupus familiaris GN=NVL PE=4 SV=1	2	2	2	2	3.4	93.688	851	4.4991	72808000	0.659117	0	0.957263	0.941336	0	1.13628	0.750128	0.777997
L7N0I1;E2QY85;F1P634;J9NV76;J9P960;J9NWA5	L7N0I1;E2QY85;F1P634	tr|L7N0I1|L7N0I1_CANLF Myosin light chain 12B OS=Canis lupus familiaris GN=MYL12B PE=4 SV=1;tr|E2QY85|E2QY85_CANLF Uncharacterized protein OS=Canis lupus familiaris GN=LOC607207 PE=4 SV=2;tr|F1P634|F1P634_CANLF Uncharacterized protein OS=Canis lupus famili	6	7	7	7	50.6	19.793	172	92.334	9915300000	0.981762	0.917474	0.975738	1.1153	0.859516	0.998299	0.691754	0.966992
E2QY93	E2QY93	tr|E2QY93|E2QY93_CANLF Nicalin OS=Canis lupus familiaris GN=NCLN PE=3 SV=1	1	10	10	10	18.3	63.1	563	23.936	2542000000	0.967456	1.04235	0.996112	0.937836	0.852784	0.96333	0.10314	1.09149
E2QY95	E2QY95	tr|E2QY95|E2QY95_CANLF DExD-box helicase 39A OS=Canis lupus familiaris GN=DDX39A PE=4 SV=1	1	12	3	3	31.9	49.091	427	9.376	1873100000	0.868875	0.917145	0.84314	0.988429	1.06845	1.05281	0.0080643	0.845474
E2QYC5;E2QYC7	E2QYC5;E2QYC7	tr|E2QYC5|E2QYC5_CANLF Oxysterol-binding protein OS=Canis lupus familiaris GN=OSBPL3 PE=3 SV=2;tr|E2QYC7|E2QYC7_CANLF Oxysterol-binding protein (Fragment) OS=Canis lupus familiaris GN=OSBPL3 PE=3 SV=2	2	8	8	8	11.3	97.104	851	17.406	418660000	1.12635	1.07853	1.19664	0.958129	0.947231	1.19507	0.316924	1.09711
E2QYD2	E2QYD2	tr|E2QYD2|E2QYD2_CANLF Electron transfer flavoprotein beta subunit OS=Canis lupus familiaris GN=ETFB PE=4 SV=2	1	13	13	13	36.3	40.651	380	60.026	9004700000	0.923387	0.971898	1.01913	1.03283	1.04509	1.00229	0.143475	0.946171
E2QYD3	E2QYD3	tr|E2QYD3|E2QYD3_CANLF Branched chain keto acid dehydrogenase E1 subunit beta OS=Canis lupus familiaris GN=BCKDHB PE=4 SV=2	1	3	3	3	8.5	42.387	387	9.5867	682490000	0.819018	0	0.965528	1.06773	0	1.18408	0.762727	0.792493
E2QYD8;J9P9Q2	E2QYD8	tr|E2QYD8|E2QYD8_CANLF Ribosomal protein L35a OS=Canis lupus familiaris GN=RPL35A PE=3 SV=1	2	7	7	7	46.4	12.538	110	13.861	24793000000	1.00763	1.02337	0.988645	0.98851	1.07869	1.16638	0.244573	0.933839
E2QYD9	E2QYD9	tr|E2QYD9|E2QYD9_CANLF Alpha-methylacyl-CoA racemase OS=Canis lupus familiaris GN=AMACR PE=4 SV=2	1	1	1	1	3.7	41.828	382	3.6307	93602000	1.10183	1.09793	0.912862	1.06626	0.90971	0.937743	0.447512	1.06827
E2QYF3	E2QYF3	tr|E2QYF3|E2QYF3_CANLF AFG3 like matrix AAA peptidase subunit 2 OS=Canis lupus familiaris GN=AFG3L2 PE=3 SV=2	1	21	21	21	27.4	89.799	806	87.044	2920900000	1.02889	0.987976	0.995487	0.93219	0.931012	0.926617	0.00427064	1.07977
E2RDU6;E2QYH5	E2RDU6;E2QYH5	tr|E2RDU6|E2RDU6_CANLF Uncharacterized protein OS=Canis lupus familiaris PE=4 SV=1;tr|E2QYH5|E2QYH5_CANLF Uncharacterized protein OS=Canis lupus familiaris GN=EBP PE=4 SV=2	2	1	1	1	5.2	26.25	230	3.3482	336430000	1.05479	1.16542	1.02462	0.888067	0.866333	1.14568	0.311974	1.11888
E2QYH6	E2QYH6	tr|E2QYH6|E2QYH6_CANLF Scaffold attachment factor B OS=Canis lupus familiaris GN=SAFB PE=4 SV=2	1	23	23	16	24.6	117.53	1054	84.665	4688100000	0.913296	0.985851	0.679135	1.04353	1.19376	0.833859	0.304168	0.839517
E2QYI1;J9PA47	E2QYI1;J9PA47	tr|E2QYI1|E2QYI1_CANLF Taxilin alpha OS=Canis lupus familiaris GN=TXLNA PE=4 SV=2;tr|J9PA47|J9PA47_CANLF Taxilin alpha OS=Canis lupus familiaris GN=TXLNA PE=4 SV=1	2	9	9	9	20	62.022	550	23.87	454000000	1.05522	0.983133	1.13614	1.13648	0.692052	1.14314	0.686465	1.06825
J9NT17;E2QYI8	J9NT17;E2QYI8	tr|J9NT17|J9NT17_CANLF Ubiquitin specific peptidase 1 OS=Canis lupus familiaris GN=USP1 PE=3 SV=1;tr|E2QYI8|E2QYI8_CANLF Ubiquitin specific peptidase 1 OS=Canis lupus familiaris GN=USP1 PE=3 SV=1	2	1	1	1	2.1	60.001	528	2.9977	3004800000	0.651466	0.452805	0.498481	0.419211	0.413828	0.473705	0.192614	1.22652
E2QYJ3	E2QYJ3	tr|E2QYJ3|E2QYJ3_CANLF Sorting nexin 1 OS=Canis lupus familiaris GN=SNX1 PE=4 SV=1	1	7	6	6	15.5	58.858	521	12.037	273400000	1.15763	1.35259	1.03895	1.09882	1.59865	0.76981	0.920755	1.02362
E2QYJ9	E2QYJ9	tr|E2QYJ9|E2QYJ9_CANLF Diphosphomevalonate decarboxylase OS=Canis lupus familiaris GN=MVD PE=3 SV=1	1	4	4	4	9.2	43.821	400	7.9081	153310000	1.09328	0.924858	1.08104	1.02422	0.815817	1.10575	0.64229	1.05208
E2QYK6	E2QYK6	tr|E2QYK6|E2QYK6_CANLF Chromobox 5 OS=Canis lupus familiaris GN=CBX5 PE=4 SV=1	1	7	6	6	37.7	22.252	191	20.052	1050800000	0.817355	0.989464	0.935337	1.02489	0.988283	1.16633	0.121468	0.862447
E2QYL0	E2QYL0	tr|E2QYL0|E2QYL0_CANLF Transmembrane p24 trafficking protein 10 OS=Canis lupus familiaris GN=TMED10 PE=3 SV=2	1	6	6	6	34.4	25.226	224	71.287	13056000000	0.954925	0.926762	0.99336	0.983803	0.917909	0.99921	0.79798	0.991081
E2QYL1	E2QYL1	tr|E2QYL1|E2QYL1_CANLF Family with sequence similarity 96 member A OS=Canis lupus familiaris GN=FAM96A PE=4 SV=2	1	2	2	2	12.3	18.746	162	2.9437	136190000	0	1.25717	1.01758	0	1.05188	1.01901	0.90186	1.09844
E2QYM4	E2QYM4	tr|E2QYM4|E2QYM4_CANLF Chloride channel CLIC like 1 OS=Canis lupus familiaris GN=CLCC1 PE=4 SV=2	1	4	4	4	11.7	62.108	546	27.278	182020000	0.961332	1.43955	1.1366	0.996309	0.798476	0.785764	0.109402	1.37083
E2QYN0	E2QYN0	tr|E2QYN0|E2QYN0_CANLF Tubulin folding cofactor B OS=Canis lupus familiaris GN=TBCB PE=4 SV=2	1	4	4	4	13.6	38.647	352	17.978	506100000	1.12611	1.28762	1.05625	1.00164	0.825029	0.951376	0.05573	1.24907
E2QYN4	E2QYN4	tr|E2QYN4|E2QYN4_CANLF ATPase inhibitory factor 1 OS=Canis lupus familiaris GN=ATPIF1 PE=4 SV=1	1	4	4	4	31.1	12.17	106	10.749	9029600000	0.993139	1.25042	0.868672	1.00506	1.27949	0.879749	0.920326	0.983545
E2QYP0	E2QYP0	tr|E2QYP0|E2QYP0_CANLF NIMA related kinase 9 OS=Canis lupus familiaris GN=NEK9 PE=4 SV=1	1	3	3	3	4.3	106.99	976	8.6513	171450000	1.11207	1.0863	0.990187	0.868076	0.839141	0.966733	0.0327895	1.19245
E2QYQ9	E2QYQ9	tr|E2QYQ9|E2QYQ9_CANLF Phosphoribosylformylglycinamidine synthase OS=Canis lupus familiaris GN=PFAS PE=3 SV=1	1	5	5	5	5.7	145.03	1341	13.424	329800000	1.08115	1.06198	1.08873	1.05048	0.933666	0.938272	0.0573432	1.10589
E2QYT4;J9NWL2	E2QYT4;J9NWL2	tr|E2QYT4|E2QYT4_CANLF Peroxisomal biogenesis factor 11 beta OS=Canis lupus familiaris GN=PEX11B PE=4 SV=1;tr|J9NWL2|J9NWL2_CANLF Peroxisomal biogenesis factor 11 beta OS=Canis lupus familiaris GN=PEX11B PE=4 SV=1	2	5	5	5	21.6	28.361	259	18.476	434240000	1.02401	0.891005	1.08036	0.993354	1.04789	1.03385	0.673028	0.974075
E2QYT6;J9NVI3	E2QYT6;J9NVI3	tr|E2QYT6|E2QYT6_CANLF Pleiotropic regulator 1 OS=Canis lupus familiaris GN=PLRG1 PE=4 SV=1;tr|J9NVI3|J9NVI3_CANLF Pleiotropic regulator 1 OS=Canis lupus familiaris GN=PLRG1 PE=4 SV=1	2	11	11	11	26.4	57.103	515	49.885	3074500000	1.02813	0.856355	0.864367	0.935132	0.962981	0.825271	0.909328	1.00935
F6XBT7;E2QYW0	F6XBT7;E2QYW0	tr|F6XBT7|F6XBT7_CANLF OS9, endoplasmic reticulum lectin OS=Canis lupus familiaris GN=OS9 PE=4 SV=1;tr|E2QYW0|E2QYW0_CANLF OS9, endoplasmic reticulum lectin OS=Canis lupus familiaris GN=OS9 PE=4 SV=2	2	4	4	4	6.7	75.825	668	16.005	286910000	1.03467	1.00954	0.879138	1.05367	1.06472	0.852526	0.859698	0.983988
E2QYW2	E2QYW2	tr|E2QYW2|E2QYW2_CANLF Replication protein A3 OS=Canis lupus familiaris GN=RPA3 PE=4 SV=1	1	2	2	2	21.5	13.628	121	7.9365	194350000	1.06246	0	1.01866	1.06395	0	1.23843	0.894046	0.903905
E2QYZ0;E2R3N2	E2QYZ0;E2R3N2	tr|E2QYZ0|E2QYZ0_CANLF Delta-1-pyrroline-5-carboxylate synthase OS=Canis lupus familiaris GN=ALDH18A1 PE=3 SV=1;tr|E2R3N2|E2R3N2_CANLF Delta-1-pyrroline-5-carboxylate synthase OS=Canis lupus familiaris GN=ALDH18A1 PE=3 SV=2	2	25	25	25	37	87.25	795	267.87	17063000000	0.954412	0.984375	0.987267	0.95047	0.943731	1.11455	0.652996	0.972513
E2QYZ9	E2QYZ9	tr|E2QYZ9|E2QYZ9_CANLF NHP2 ribonucleoprotein OS=Canis lupus familiaris GN=NHP2 PE=4 SV=1	1	3	3	3	24.2	17.235	153	8.5652	612620000	0.990952	0.973798	1.03474	1.08788	1.02838	1.05579	0.0828102	0.945596
E2QZ05	E2QZ05	tr|E2QZ05|E2QZ05_CANLF Dynactin subunit 2 OS=Canis lupus familiaris GN=DCTN2 PE=4 SV=1	1	13	13	13	37.2	44.417	403	40.658	1638100000	1.12367	0.966661	1.04424	1.04469	0.967613	0.981797	0.411682	1.04692
E2QZ13	E2QZ13	tr|E2QZ13|E2QZ13_CANLF 3-phosphoadenosine 5-phosphosulfate synthase 1 OS=Canis lupus familiaris GN=PAPSS1 PE=3 SV=1	1	7	6	6	12.2	71.008	625	18.303	961590000	1.08077	1.04987	1.04077	1.08248	0.973658	1.10981	0.968499	1.00172
E2QZ39;E2R9F9;F1PXN6	E2QZ39;E2R9F9;F1PXN6	tr|E2QZ39|E2QZ39_CANLF Aldehyde dehydrogenase OS=Canis lupus familiaris GN=ALDH3B1 PE=3 SV=2;tr|E2R9F9|E2R9F9_CANLF Aldehyde dehydrogenase OS=Canis lupus familiaris GN=ALDH3B2 PE=3 SV=2;tr|F1PXN6|F1PXN6_CANLF Aldehyde dehydrogenase 3 family member B1 OS=Ca	3	4	4	4	8.8	52.074	468	9.3846	529940000	1.22424	0.937729	1.06919	0.937617	0.961503	1.06707	0.390755	1.08933
E2QZ50;F1PL71;E2RH53	E2QZ50	tr|E2QZ50|E2QZ50_CANLF Adenylyl cyclase-associated protein OS=Canis lupus familiaris GN=CAP1 PE=3 SV=1	3	20	20	20	48.2	51.453	475	130.81	19542000000	1.09189	1.13494	1.09317	1.05718	1.00059	0.98738	0.0233552	1.09026
J9P5Z8;E2QZ56	J9P5Z8;E2QZ56	tr|J9P5Z8|J9P5Z8_CANLF Uncharacterized protein OS=Canis lupus familiaris PE=4 SV=1;tr|E2QZ56|E2QZ56_CANLF Uncharacterized protein OS=Canis lupus familiaris GN=LSM5 PE=4 SV=1	2	1	1	1	22.1	9.3097	86	9.857	278620000	0.84845	1.09919	1.49788	1.05305	0.986088	1.36321	0.951409	1.01269
E2QZ61	E2QZ61	tr|E2QZ61|E2QZ61_CANLF Uncharacterized protein OS=Canis lupus familiaris GN=ATAD3A PE=4 SV=1	1	16	16	16	30.1	66.665	591	66.419	3838300000	0.909279	0.8501	0.763483	0.972634	0.997117	0.790509	0.366146	0.913994
E2QZ99	E2QZ99	tr|E2QZ99|E2QZ99_CANLF BRX1, biogenesis of ribosomes OS=Canis lupus familiaris GN=BRIX1 PE=4 SV=1	1	2	2	2	6.1	40.477	347	4.8201	234390000	1.02176	0.847706	0.916362	1.04027	2.2605	1.10823	0.246712	0.63185
E2QZA1	E2QZA1	tr|E2QZA1|E2QZA1_CANLF MICOS complex subunit MIC13 OS=Canis lupus familiaris GN=C19orf70 PE=3 SV=1	1	4	4	4	51.7	13.395	118	44.055	1068100000	0.848835	0.975559	0.922725	0.996076	0.947691	1.39044	0.24833	0.823919
E2QZB3	E2QZB3	tr|E2QZB3|E2QZB3_CANLF HSPA (Hsp70) binding protein 1 OS=Canis lupus familiaris GN=HSPBP1 PE=4 SV=1	1	3	3	3	12.6	39.292	357	51.156	365250000	1.26056	0	1.3414	1.0584	0	1.05567	0.785655	1.23078
E2QZD4;J9NVM8	E2QZD4;J9NVM8	tr|E2QZD4|E2QZD4_CANLF Solute carrier family 16 member 3 OS=Canis lupus familiaris GN=SLC16A3 PE=4 SV=1;tr|J9NVM8|J9NVM8_CANLF Solute carrier family 16 member 3 OS=Canis lupus familiaris GN=SLC16A3 PE=4 SV=1	2	2	2	2	4.3	49.875	465	4.9342	246820000	0.727258	0	0.892778	1.10851	0	1.20898	0.649869	0.699049
E2QZF6	E2QZF6	tr|E2QZF6|E2QZF6_CANLF Ubiquitin specific peptidase 39 OS=Canis lupus familiaris GN=USP39 PE=4 SV=1	1	4	4	4	8.2	64.767	561	11.441	406390000	0.969266	0	1.00991	1.03416	0	1.07543	0.932528	0.93818
J9PAG2;J9P168;J9NZX1;E2QZG2;J9P9J8;J9NSZ2;J9P608;F6XF47;J9NZS5;J9P9Q1;J9P1I4;J9PBK4;J9JHH2;L7N0P6;J9P9N9;J9P6G3;E2QXN3;J9P8H2;F1PN68;E2RMH5;J9P016;J9NZA8;J9P7S4;J9P5C6;F1PZK2;J9P7S6;E2R885;H9GWH4;E2R2D4;F1PFY8;L7N0H6	J9PAG2;J9P168;J9NZX1;E2QZG2;J9P9J8;J9NSZ2;J9P608;F6XF47;J9NZS5;J9P9Q1;J9P1I4;J9PBK4;J9JHH2;L7N0P6;J9P9N9;J9P6G3;E2QXN3;J9P8H2;F1PN68;E2RMH5;J9P016	tr|J9PAG2|J9PAG2_CANLF Uncharacterized protein OS=Canis lupus familiaris PE=3 SV=1;tr|J9P168|J9P168_CANLF Uncharacterized protein OS=Canis lupus familiaris PE=3 SV=1;tr|J9NZX1|J9NZX1_CANLF Uncharacterized protein OS=Canis lupus familiaris PE=3 SV=1;tr|E2QZ	31	8	8	8	46.2	17.727	156	17.393	19107000000	1.15524	1.02638	0.923242	0.991669	1.02985	1.13063	0.851323	0.984995
E2QZG9	E2QZG9	tr|E2QZG9|E2QZG9_CANLF Uncharacterized protein OS=Canis lupus familiaris GN=PWP2 PE=4 SV=2	1	5	5	5	5.1	101.7	916	9.7185	300910000	1.00003	0.947142	0.879786	0.941741	0.720084	1.0054	0.598397	1.05989
E2QZN3	E2QZN3	tr|E2QZN3|E2QZN3_CANLF Eukaryotic translation initiation factor 2B subunit beta OS=Canis lupus familiaris GN=EIF2B2 PE=3 SV=1	1	2	2	2	7.1	39.008	351	4.7816	113650000	0	1.03852	1.18195	0	1.06048	1.01011	0.926378	1.07238
E2QZS2	E2QZS2	tr|E2QZS2|E2QZS2_CANLF MYC associated factor X OS=Canis lupus familiaris GN=MAX PE=4 SV=1	1	2	2	2	12.5	18.275	160	4.0406	174140000	0.821756	0	1.0021	1.0715	0	1.16725	0.789629	0.814676
E2QZS5	E2QZS5	tr|E2QZS5|E2QZS5_CANLF Mitochondrial ribosomal protein L44 OS=Canis lupus familiaris GN=MRPL44 PE=4 SV=2	1	3	3	3	9	37.274	332	6.288	276850000	0.886121	0	0.836541	1.05032	0	1.1876	0.734671	0.769761
E2QZT4	E2QZT4	tr|E2QZT4|E2QZT4_CANLF Basigin (Ok blood group) OS=Canis lupus familiaris GN=BSG PE=4 SV=1	1	9	9	9	33.6	29.302	268	21.839	3556000000	0.830078	0.901177	0.855322	1.05768	0.826152	1.04118	0.218845	0.884297
E2QZV1	E2QZV1	tr|E2QZV1|E2QZV1_CANLF Ubiquitin like modifier activating enzyme 5 OS=Canis lupus familiaris GN=UBA5 PE=4 SV=2	1	2	2	2	5.2	47.164	427	3.2476	171580000	1.07531	0	1.06002	1.01936	0	1.00437	0.94317	1.05515
E2QZX4	E2QZX4	tr|E2QZX4|E2QZX4_CANLF NOC3 like DNA replication regulator OS=Canis lupus familiaris GN=NOC3L PE=4 SV=1	1	2	2	2	2.4	92.67	799	3.2657	329050000	1.00875	0.96949	1.06434	0.946903	0.830838	1.17018	0.775263	1.03211
E2R029;E2R009	E2R029;E2R009	tr|E2R029|E2R029_CANLF Tax1 binding protein 1 OS=Canis lupus familiaris GN=TAX1BP1 PE=4 SV=1;tr|E2R009|E2R009_CANLF Tax1 binding protein 1 OS=Canis lupus familiaris GN=TAX1BP1 PE=4 SV=2	2	3	3	3	4.2	91.24	792	5.7089	73805000	0.921052	0.92738	0.842602	1.37656	0.784515	1.32132	0.238933	0.772753
E2R020	E2R020	tr|E2R020|E2R020_CANLF Ras homolog family member G OS=Canis lupus familiaris GN=RHOG PE=3 SV=2	1	6	5	5	33.7	28.185	255	21.513	1114600000	0.909876	1.05253	0.981174	1.04771	0.784758	1.26612	0.739788	0.949973
E2R028;F1PIU8	E2R028;F1PIU8	tr|E2R028|E2R028_CANLF La ribonucleoprotein domain family member 4 OS=Canis lupus familiaris GN=LARP4 PE=4 SV=2;tr|F1PIU8|F1PIU8_CANLF La ribonucleoprotein domain family member 4 OS=Canis lupus familiaris GN=LARP4 PE=4 SV=2	2	6	6	6	9.2	80.333	721	14.711	192040000	1.1275	0.869865	1.0072	1.07714	1.19182	0.975072	0.457905	0.926185
E2R057	E2R057	tr|E2R057|E2R057_CANLF ADP ribosylation factor interacting protein 1 OS=Canis lupus familiaris GN=ARFIP1 PE=4 SV=2	1	7	7	7	23.6	44.694	402	19.926	1390600000	0	1.42136	1.1603	0	0.500326	0.799552	0.436899	1.98607
E2R060	E2R060	tr|E2R060|E2R060_CANLF Uncharacterized protein OS=Canis lupus familiaris PE=4 SV=2	1	1	1	1	9.5	26.295	253	5.1744	78736000	0	1.97374	0.903097	0	0.491261	1.00935	0.51349	1.91711
E2R071	E2R071	tr|E2R071|E2R071_CANLF GIPC PDZ domain containing family member 1 OS=Canis lupus familiaris GN=GIPC1 PE=4 SV=1	1	4	4	4	14.7	35.932	333	29.145	408540000	1.03894	1.2086	1.02392	1.16015	1.03871	0.957064	0.668924	1.03661
E2R077	E2R077	tr|E2R077|E2R077_CANLF Mitochondrial ribosomal protein L19 OS=Canis lupus familiaris GN=MRPL19 PE=4 SV=2	1	2	2	2	6.2	33.105	292	3.4525	198690000	0.887528	0	0.949604	0.921064	0	1.08866	0.905839	0.91412
E2R095	E2R095	tr|E2R095|E2R095_CANLF 5-nucleotidase OS=Canis lupus familiaris GN=NT5C3B PE=3 SV=2	1	3	3	3	7.7	46.563	414	6.1566	236260000	0	1.12558	1.15231	0	0.814006	0.813193	0.666237	1.39988
E2R0A6	E2R0A6	tr|E2R0A6|E2R0A6_CANLF Ribosomal protein L28 OS=Canis lupus familiaris GN=RPL28 PE=4 SV=1	1	8	8	8	44.5	15.717	137	23.604	13098000000	1.00907	0.951892	0.906977	0.988747	0.979173	0.898726	0.992117	1.00045
E2R0B6	E2R0B6	tr|E2R0B6|E2R0B6_CANLF Proteasome subunit beta type OS=Canis lupus familiaris GN=PSMB6 PE=3 SV=1	1	5	5	5	19.7	25.474	239	17.713	4450100000	1.08817	1.11539	1.0694	0.987936	0.951281	1.00736	0.0068073	1.11077
E2R0D1	E2R0D1	tr|E2R0D1|E2R0D1_CANLF CTR9 homolog, Paf1/RNA polymerase II complex component OS=Canis lupus familiaris GN=CTR9 PE=4 SV=2	1	3	3	3	3.8	133.54	1173	16.038	247430000	1.04239	1.09898	0	1.0568	1.02009	0	0.967614	1.03105
E2R0F2	E2R0F2	tr|E2R0F2|E2R0F2_CANLF Filamin B OS=Canis lupus familiaris GN=FLNB PE=4 SV=2	1	99	99	88	50.1	281.21	2633	323.31	101000000000	0.991092	0.992347	1.00894	1.08405	1.03903	1.07837	0.0103328	0.934695
E2R0H0	E2R0H0	tr|E2R0H0|E2R0H0_CANLF Dihydrolipoamide S-succinyltransferase OS=Canis lupus familiaris GN=DLST PE=4 SV=1	1	9	9	9	28.1	48.966	455	68.877	9580100000	0.853197	0.836245	1.02591	1.02346	0.966463	1.14875	0.15668	0.865126
E2R0J4	E2R0J4	tr|E2R0J4|E2R0J4_CANLF Anthrax toxin receptor 2 OS=Canis lupus familiaris GN=ANTXR2 PE=4 SV=2	1	2	2	2	3.6	54.212	496	2.3721	113730000	1.21339	0	1.21312	0.96587	0	1.02574	0.79556	1.21836
J9P0L7;E2R0J6;J9P487;F1PX98;F1P8X1	J9P0L7;E2R0J6	tr|J9P0L7|J9P0L7_CANLF Serine/threonine-protein phosphatase 2A 55 kDa regulatory subunit B OS=Canis lupus familiaris GN=PPP2R2A PE=3 SV=1;tr|E2R0J6|E2R0J6_CANLF Serine/threonine-protein phosphatase 2A 55 kDa regulatory subunit B OS=Canis lupus familiaris G	5	7	7	7	17	51.691	447	21.098	711780000	1.17142	1.4162	1.07696	0.972418	0.777559	1.0081	0.0712956	1.32868
E2R0K4	E2R0K4	tr|E2R0K4|E2R0K4_CANLF RAB14, member RAS oncogene family OS=Canis lupus familiaris GN=RAB14 PE=4 SV=1	1	13	13	12	74.9	23.897	215	108.23	7020400000	0.749144	0.973659	0.986256	0.922446	1.07793	1.10375	0.240398	0.872727
J9P906;E2R0K5	J9P906;E2R0K5	tr|J9P906|J9P906_CANLF Signal sequence receptor subunit 3 OS=Canis lupus familiaris GN=SSR3 PE=4 SV=1;tr|E2R0K5|E2R0K5_CANLF Signal sequence receptor subunit 3 OS=Canis lupus familiaris GN=SSR3 PE=4 SV=1	2	2	2	2	18.3	13.86	120	24.932	1068000000	0.874531	0.771806	1.03583	1.07328	0.26127	1.24371	0.917139	1.0403
E2R0L9	E2R0L9	tr|E2R0L9|E2R0L9_CANLF T-complex 1 OS=Canis lupus familiaris GN=TCP1 PE=3 SV=1	1	23	23	23	51.8	60.253	556	149.45	29600000000	1.16765	1.10407	1.11052	1.0449	1.01355	1.02528	0.0109349	1.0968
E2R0M5;J9P1I5	E2R0M5	tr|E2R0M5|E2R0M5_CANLF Activity dependent neuroprotector homeobox OS=Canis lupus familiaris GN=ADNP PE=4 SV=1	2	3	3	3	2.6	123.51	1103	3.4372	18130000	1.00837	0.937483	0	1.08678	0.943638	0	0.955145	0.958351
E2R0P2	E2R0P2	tr|E2R0P2|E2R0P2_CANLF NudC domain containing 1 OS=Canis lupus familiaris GN=NUDCD1 PE=4 SV=2	1	6	6	6	10.5	66.885	583	14.509	3791000000	1.03747	0.988276	0.901068	1.06491	1.13366	1.04338	0.0952291	0.902792
E2R0P3	E2R0P3	tr|E2R0P3|E2R0P3_CANLF Isochorismatase domain containing 1 OS=Canis lupus familiaris GN=ISOC1 PE=4 SV=1	1	1	1	1	5	32.482	303	34.345	249990000	0	1.20881	1.22041	0	0.937062	0.940742	0.737622	1.29365
E2R0P8;E2RL06	E2R0P8;E2RL06	tr|E2R0P8|E2R0P8_CANLF Uncharacterized protein OS=Canis lupus familiaris GN=EMC2 PE=4 SV=1;tr|E2RL06|E2RL06_CANLF Uncharacterized protein OS=Canis lupus familiaris GN=LOC481017 PE=4 SV=1	2	3	3	3	11.8	34.833	297	6.9668	384520000	0.870152	0.948597	0.887455	0.942539	1.0417	1.235	0.127391	0.840634
E2R0Q1	E2R0Q1	tr|E2R0Q1|E2R0Q1_CANLF Protein-S-isoprenylcysteine O-methyltransferase OS=Canis lupus familiaris GN=GPR153 PE=3 SV=2	1	1	1	1	3	68.276	607	32.065	134680000	0.672813	0.65931	1.05941	0.72956	1.12342	1.00687	0.424348	0.836242
E2R0R1;J9NSU9	E2R0R1;J9NSU9	tr|E2R0R1|E2R0R1_CANLF Uncharacterized protein OS=Canis lupus familiaris GN=PSMD9 PE=4 SV=2;tr|J9NSU9|J9NSU9_CANLF Uncharacterized protein OS=Canis lupus familiaris GN=PSMD9 PE=4 SV=1	2	4	4	4	22	24.787	223	15.884	282720000	1.16278	1.35211	1.17917	1.11665	0.865681	0.987976	0.0629878	1.24367
E2R0S7	E2R0S7	tr|E2R0S7|E2R0S7_CANLF LUC7 like OS=Canis lupus familiaris GN=LUC7L PE=4 SV=2	1	10	3	3	24.8	43.729	371	3.8141	79132000	1.10831	0	0.870423	1.08066	0	1.16293	0.869413	0.881946
E2R0S8;F1PM36	E2R0S8;F1PM36	tr|E2R0S8|E2R0S8_CANLF G1 to S phase transition 1 OS=Canis lupus familiaris GN=GSPT1 PE=4 SV=2;tr|F1PM36|F1PM36_CANLF G1 to S phase transition 1 OS=Canis lupus familiaris GN=GSPT1 PE=4 SV=2	2	10	10	10	18.8	58.079	522	21.498	1910000000	1.10277	1.15942	1.06417	1.01438	0.988842	1.00327	0.0204017	1.10639
E2R0T6;H9GW49	E2R0T6;H9GW49	tr|E2R0T6|E2R0T6_CANLF Uncharacterized protein OS=Canis lupus familiaris GN=HSPA8 PE=3 SV=1;tr|H9GW49|H9GW49_CANLF Uncharacterized protein OS=Canis lupus familiaris PE=3 SV=1	2	33	30	24	67.5	70.897	646	323.31	270000000000	0.983688	0.934207	1.00333	1.07104	1.0861	1.03654	0.0228471	0.91469
E2R0X3;L7N0D1	E2R0X3	tr|E2R0X3|E2R0X3_CANLF Phosphoribosyl pyrophosphate synthetase 2 OS=Canis lupus familiaris GN=PRPS2 PE=3 SV=1	2	7	4	4	28	34.793	318	9.8805	278740000	0	0.970042	1.18568	0	0.97211	0.937167	0.873478	1.12908
E2R0X5	E2R0X5	tr|E2R0X5|E2R0X5_CANLF Acyl-CoA dehydrogenase family member 11 OS=Canis lupus familiaris GN=ACAD11 PE=4 SV=2	1	4	4	3	7.2	86.926	781	6.6902	166700000	0.905366	0.841578	0.996919	0.954203	0.992873	0.995685	0.231386	0.932411
E2RHC1;E2R0Y4	E2RHC1;E2R0Y4	tr|E2RHC1|E2RHC1_CANLF Cleavage and polyadenylation specific factor 7 OS=Canis lupus familiaris GN=CPSF7 PE=4 SV=1;tr|E2R0Y4|E2R0Y4_CANLF Cleavage and polyadenylation specific factor 7 OS=Canis lupus familiaris GN=CPSF7 PE=4 SV=2	2	9	9	9	22.1	52.049	471	46.683	1443100000	0.968498	0.913178	1.04244	0.97591	0.977885	1.16672	0.423576	0.937062
E2R0Y5	E2R0Y5	tr|E2R0Y5|E2R0Y5_CANLF Succinate--CoA ligase [ADP/GDP-forming] subunit alpha, mitochondrial OS=Canis lupus familiaris GN=SUCLG1 PE=3 SV=1	1	7	7	7	30.9	36.109	346	80.701	7568600000	0.92099	0.813259	0.990367	0.985114	1.01466	0.975449	0.189165	0.915768
E2R0Z0;F1DH42	E2R0Z0;F1DH42	tr|E2R0Z0|E2R0Z0_CANLF Cadherin 6 OS=Canis lupus familiaris GN=CDH6 PE=4 SV=2;tr|F1DH42|F1DH42_CANLF Cadherin 6 (Fragment) OS=Canis lupus familiaris PE=2 SV=1	2	3	3	3	4.4	88.65	791	5.1083	69109000	0	1.06938	0.960289	0	1.00699	1.06436	0.978502	0.979876
E2R112	E2R112	tr|E2R112|E2R112_CANLF ER membrane protein complex subunit 10 OS=Canis lupus familiaris GN=EMC10 PE=4 SV=2	1	2	2	2	9.5	27.378	262	17.63	487760000	0.808252	1.23258	0.946717	1.02087	0.663912	1.1675	0.828368	1.04742
E2R117	E2R117	tr|E2R117|E2R117_CANLF Translocase of inner mitochondrial membrane 21 OS=Canis lupus familiaris GN=TIMM21 PE=4 SV=1	1	2	2	2	8.6	27.655	244	9.166	125630000	0.960976	1.10648	0.936783	0.948699	0.890545	1.25414	0.823217	0.971182
E2R118	E2R118	tr|E2R118|E2R118_CANLF Uncharacterized protein OS=Canis lupus familiaris PE=4 SV=2	1	5	5	5	29.9	15.572	137	33.003	6268900000	1.04975	1.02753	1.02549	1.10605	1.18612	1.08636	0.0432475	0.918377
J9P2H3;E2R129	J9P2H3;E2R129	tr|J9P2H3|J9P2H3_CANLF Elongin C OS=Canis lupus familiaris GN=ELOC PE=3 SV=1;tr|E2R129|E2R129_CANLF Elongin C OS=Canis lupus familiaris GN=ELOC PE=3 SV=2	2	5	5	5	58	12.473	112	28.065	2997300000	1.00428	1.05359	0.976108	1.07471	0.949695	0.961513	0.744298	1.0161
E2R136	E2R136	tr|E2R136|E2R136_CANLF Zinc binding alcohol dehydrogenase domain containing 2 OS=Canis lupus familiaris GN=ZADH2 PE=4 SV=1	1	2	2	2	5.8	40.101	377	3.6903	72535000	1.17301	0	1.21713	0.945698	0	0.950658	0.762468	1.26039
E2R149;J9P1E5;J9NVY8	E2R149	tr|E2R149|E2R149_CANLF Ribosomal protein L9 OS=Canis lupus familiaris GN=RPL9 PE=4 SV=1	3	9	9	9	53.6	21.863	192	37.758	12368000000	1.04562	0.873516	0.968182	1.02909	1.06493	1.02242	0.212135	0.926481
E2R198	E2R198	tr|E2R198|E2R198_CANLF Peptidyl-prolyl cis-trans isomerase OS=Canis lupus familiaris GN=PPIH PE=3 SV=1	1	2	2	2	9.6	19.208	177	4.441	157110000	0.975832	0	0.955577	1.12843	0	1.22326	0.796369	0.821286
E2R1A0;J9NTJ7	E2R1A0;J9NTJ7	tr|E2R1A0|E2R1A0_CANLF Y-box binding protein 1 OS=Canis lupus familiaris GN=YBX1 PE=4 SV=2;tr|J9NTJ7|J9NTJ7_CANLF Uncharacterized protein OS=Canis lupus familiaris PE=4 SV=1	2	10	10	7	43.2	39.505	359	97.919	14587000000	0.904054	0.977559	0.935874	1.11145	1.01947	1.27392	0.0646313	0.827495
E2R1A1	E2R1A1	tr|E2R1A1|E2R1A1_CANLF OTU deubiquitinase 4 OS=Canis lupus familiaris GN=OTUD4 PE=4 SV=2	1	3	3	2	3.1	123.46	1108	3.3056	45303000	0.989455	0.955716	0	0.944697	1.0011	0	0.999661	0.99968
E2R1A6	E2R1A6	tr|E2R1A6|E2R1A6_CANLF Cytochrome b-c1 complex subunit Rieske, mitochondrial OS=Canis lupus familiaris GN=UQCRFS1 PE=4 SV=1	1	10	10	9	32.5	29.452	274	22.001	2835500000	1.07984	1.00797	0.995561	0.915435	1.01206	0.945344	0.144822	1.07328
E2R1C3	E2R1C3	tr|E2R1C3|E2R1C3_CANLF Proteasome subunit alpha type OS=Canis lupus familiaris PE=3 SV=2	1	1	1	1	5.6	27.665	248	3.6268	699890000	0	1.0421	1.23546	0	0.961416	0.764027	0.722477	1.31998
E2R1C4;J9NT78	E2R1C4	tr|E2R1C4|E2R1C4_CANLF Small nuclear ribonucleoprotein-associated protein OS=Canis lupus familiaris GN=SNRPB PE=3 SV=2	2	7	7	3	47.6	23.656	231	36.243	4487100000	1.03723	1.0091	0.985728	0.962847	0.978272	1.04156	0.592172	1.01656
E2R1D1	E2R1D1	tr|E2R1D1|E2R1D1_CANLF GDP-mannose pyrophosphorylase A OS=Canis lupus familiaris GN=GMPPA PE=4 SV=1	1	2	2	2	5.7	46.094	420	2.6927	61095000	1.20598	1.26552	0	1.09396	1.02317	0	0.838452	1.16738
E2R1E3	E2R1E3	tr|E2R1E3|E2R1E3_CANLF 3-phosphoadenosine 5-phosphosulfate synthase 2 OS=Canis lupus familiaris GN=PAPSS2 PE=3 SV=1	1	10	10	9	17.7	69.972	621	21.688	741970000	1.06502	1.12978	1.1235	1.07984	0.977675	1.11746	0.363022	1.04514
E2R1E6	E2R1E6	tr|E2R1E6|E2R1E6_CANLF EPS8 like 2 OS=Canis lupus familiaris GN=EPS8L2 PE=4 SV=2	1	7	7	7	12.3	63.045	560	16.951	492250000	0.984667	1.13524	0.974354	1.16411	1.09773	1.26821	0.113338	0.876548
E2R1F6	E2R1F6	tr|E2R1F6|E2R1F6_CANLF 1-acyl-sn-glycerol-3-phosphate acyltransferase OS=Canis lupus familiaris GN=AGPAT2 PE=3 SV=2	1	2	2	2	10.2	30.941	274	5.5808	140170000	0	0.948463	0.832444	0	1.13247	1.02321	0.80284	0.826147
E2R1J6	E2R1J6	tr|E2R1J6|E2R1J6_CANLF Eukaryotic translation initiation factor 3 subunit E OS=Canis lupus familiaris GN=EIF3E PE=3 SV=1	1	16	16	16	37.1	52.22	445	72.505	7947100000	1.00822	0.948886	0.948334	1.03647	1.06136	1.06828	0.017066	0.91767
E2R1K0;J9P942	E2R1K0	tr|E2R1K0|E2R1K0_CANLF Uncharacterized protein OS=Canis lupus familiaris GN=FAM136A PE=4 SV=1	2	3	3	3	16.7	15.657	138	3.9522	265920000	0.988164	1.04835	1.14147	1.31863	0.92028	1.13199	0.629835	0.942771
E2R1K2	E2R1K2	tr|E2R1K2|E2R1K2_CANLF RAB, member RAS oncogene family like 6 OS=Canis lupus familiaris GN=RABL6 PE=4 SV=1	1	2	2	2	4.1	79.03	715	5.582	73143000	1.33914	0	1.26772	1.07719	0	1.02853	0.779973	1.238
E2R1N7	E2R1N7	tr|E2R1N7|E2R1N7_CANLF Prenylcysteine oxidase 1 OS=Canis lupus familiaris GN=PCYOX1 PE=3 SV=1	1	9	9	9	22.2	56.704	505	25.376	1566600000	0.921541	0.958325	0.855803	0.902847	0.827559	0.909917	0.47053	1.03611
E2R1N9;J9P663	E2R1N9;J9P663	tr|E2R1N9|E2R1N9_CANLF ALS2 C-terminal like OS=Canis lupus familiaris GN=ALS2CL PE=4 SV=1;tr|J9P663|J9P663_CANLF ALS2 C-terminal like OS=Canis lupus familiaris GN=ALS2CL PE=4 SV=1	2	2	2	2	2.3	107.28	951	8.3493	31408000	1.03477	1.00463	1.50611	1.03837	1.04775	1.56697	0.887743	0.970549
E2R1P4;E2R1P9	E2R1P4;E2R1P9	tr|E2R1P4|E2R1P4_CANLF Methionine aminopeptidase 2 OS=Canis lupus familiaris GN=METAP2 PE=3 SV=2;tr|E2R1P9|E2R1P9_CANLF Methionine aminopeptidase 2 OS=Canis lupus familiaris GN=METAP2 PE=3 SV=2	2	4	4	4	12.1	52.876	478	16.299	925190000	1.12546	1.0922	0.9076	1.09941	1.0423	1.08228	0.662051	0.969377
E2R1S5	E2R1S5	tr|E2R1S5|E2R1S5_CANLF Eukaryotic translation initiation factor 6 OS=Canis lupus familiaris GN=EIF6 PE=3 SV=2	1	5	5	5	33.5	26.267	242	51.066	1962100000	1.01384	1.02075	0.894578	1.05045	1.01455	1.17329	0.178042	0.904542
E2R1S9	E2R1S9	tr|E2R1S9|E2R1S9_CANLF Dehydrogenase/reductase 2 OS=Canis lupus familiaris GN=DHRS2 PE=4 SV=2	1	10	10	6	42.1	27.879	259	96.257	82977000000	0.911669	0.915238	0.792755	1.01755	1.01076	0.780221	0.512859	0.93275
E2R1T2	E2R1T2	tr|E2R1T2|E2R1T2_CANLF Mitochondrial trans-2-enoyl-CoA reductase OS=Canis lupus familiaris GN=MECR PE=4 SV=1	1	4	4	4	12.5	39.373	367	11.535	269310000	0.869383	1.13086	0.89545	1.03018	0.766375	0.994415	0.780676	1.03752
E2R1V2	E2R1V2	tr|E2R1V2|E2R1V2_CANLF Cullin 1 OS=Canis lupus familiaris GN=CUL1 PE=3 SV=2	1	7	7	7	8.2	89.66	776	10.89	342960000	1.00222	1.22134	1.0994	0.963998	0.891388	1.03486	0.129508	1.14972
E2R1W5;J9NUJ1	E2R1W5;J9NUJ1	tr|E2R1W5|E2R1W5_CANLF ATPase H+ transporting V1 subunit B1 OS=Canis lupus familiaris GN=ATP6V1B1 PE=3 SV=2;tr|J9NUJ1|J9NUJ1_CANLF ATPase H+ transporting V1 subunit B1 OS=Canis lupus familiaris GN=ATP6V1B1 PE=4 SV=1	2	6	4	4	16.5	57.536	521	34.065	391280000	1.61956	0	1.38937	0.74314	0	0.664851	0.393134	2.13703
E2R1X0	E2R1X0	tr|E2R1X0|E2R1X0_CANLF Neuroguidin OS=Canis lupus familiaris GN=NGDN PE=4 SV=1	1	4	4	4	16.7	36.299	318	12.994	234580000	0.90351	0	0.723634	1.16506	0	1.09958	0.673359	0.718501
E2R1X1	E2R1X1	tr|E2R1X1|E2R1X1_CANLF Nucleolar protein 10 OS=Canis lupus familiaris GN=NOL10 PE=4 SV=1	1	3	3	3	5.7	80.21	688	7.0946	337820000	0.976312	0.796072	0.693648	0.933798	1.00516	0.867295	0.283891	0.878763
E2R204	E2R204	tr|E2R204|E2R204_CANLF Thioredoxin like 4A OS=Canis lupus familiaris GN=TXNL4A PE=4 SV=1	1	2	2	2	16.9	16.8	142	5.9793	176280000	0.925769	0	0.969191	0.98994	0	0.986973	0.95516	0.958545
E2R222	E2R222	sp|E2R222|PCH2_CANLF Pachytene checkpoint protein 2 homolog OS=Canis lupus familiaris GN=TRIP13 PE=3 SV=1	1	4	4	4	10	48.434	432	9.6699	396810000	1.1009	1.05892	1.06682	1.01984	0.960327	0.924576	0.0248121	1.11082
E2R236	E2R236	tr|E2R236|E2R236_CANLF Translocase of inner mitochondrial membrane 10 OS=Canis lupus familiaris GN=TIMM10 PE=4 SV=1	1	3	3	3	31.1	10.361	90	7.3489	1201500000	0.742087	0.878568	0.710573	0.965118	1.17439	0.790016	0.178807	0.795771
E2R257	E2R257	tr|E2R257|E2R257_CANLF Lipoyl synthase, mitochondrial OS=Canis lupus familiaris GN=LIAS PE=3 SV=1	1	2	2	2	6.7	41.965	373	4.2017	219250000	0.975969	0.89002	0	0.874102	0.93454	0	0.966992	1.03171
E2R268	E2R268	tr|E2R268|E2R268_CANLF Uncharacterized protein OS=Canis lupus familiaris GN=PDHB PE=4 SV=1	1	11	2	2	37.6	39.249	359	14.61	1903000000	0.79332	0.918484	1.08891	1.05238	1.02886	0.939052	0.472424	0.927297
E2R287	E2R287	tr|E2R287|E2R287_CANLF Syntaxin 5 OS=Canis lupus familiaris GN=STX5 PE=3 SV=1	1	1	1	1	3.4	39.632	355	3.6474	324160000	0.873838	1.06078	0.921156	0.954961	1.09059	1.08433	0.270025	0.91242
E2R294;E2R293	E2R294;E2R293	tr|E2R294|E2R294_CANLF NDC1 transmembrane nucleoporin OS=Canis lupus familiaris GN=NDC1 PE=4 SV=1;tr|E2R293|E2R293_CANLF NDC1 transmembrane nucleoporin OS=Canis lupus familiaris GN=NDC1 PE=4 SV=2	2	5	5	5	11.4	76.144	674	38.551	1040700000	1.01268	1.00168	1.02913	1.01588	0.952949	1.32553	0.508877	0.923849
E2R297	E2R297	tr|E2R297|E2R297_CANLF Uncharacterized protein OS=Canis lupus familiaris GN=LOC102152612 PE=4 SV=1	1	3	3	3	24.6	14.238	122	7.6085	970390000	1.10896	1.12104	1.19846	1.07176	0.993442	1.14138	0.221431	1.06919
E2R2B7	E2R2B7	tr|E2R2B7|E2R2B7_CANLF WD repeat domain 74 OS=Canis lupus familiaris GN=WDR74 PE=4 SV=1	1	4	4	4	12.8	42.179	383	9.0501	72280000	0.930188	0	0.960234	0.91408	0	0.639728	0.800507	1.21664
E2R2D2	E2R2D2	tr|E2R2D2|E2R2D2_CANLF Mitochondrial ribosomal protein S35 OS=Canis lupus familiaris GN=MRPS35 PE=2 SV=2	1	8	8	8	32.9	36.895	325	33.237	632090000	1.02171	0.994506	1.09619	0.960046	1.01874	1.19435	0.804796	0.980861
E2R2F2	E2R2F2	tr|E2R2F2|E2R2F2_CANLF Endothelial differentiation related factor 1 OS=Canis lupus familiaris GN=EDF1 PE=4 SV=1	1	5	5	5	35.1	16.368	148	10.345	576950000	0.915275	1.1343	1.17418	0.926096	0.794341	1.07544	0.280253	1.15304
E2R2H9	E2R2H9	tr|E2R2H9|E2R2H9_CANLF FMR1 autosomal homolog 2 OS=Canis lupus familiaris GN=FXR2 PE=4 SV=1	1	4	3	2	7.4	74.176	672	14.858	168160000	1.00906	1.0714	0.602032	1.08099	1.06164	1.0463	0.316298	0.841192
E2R2I4	E2R2I4	tr|E2R2I4|E2R2I4_CANLF Fas associated factor family member 2 OS=Canis lupus familiaris GN=FAF2 PE=4 SV=1	1	4	4	4	11.9	52.651	445	19.464	516680000	0.914845	0.944999	0.681524	1.03662	1.09652	0.629453	0.684584	0.919918
E2R2J0	E2R2J0	tr|E2R2J0|E2R2J0_CANLF Nucleolar protein 11 OS=Canis lupus familiaris GN=NOL11 PE=4 SV=1	1	8	8	8	13	81.071	716	16.497	850330000	0.980326	0.905646	0.917103	0.993288	1.03733	1.33383	0.162426	0.833144
E2R2K4	E2R2K4	tr|E2R2K4|E2R2K4_CANLF RAP1B, member of RAS oncogene family OS=Canis lupus familiaris GN=RAP1B PE=4 SV=1	1	6	6	3	31	20.839	184	22.985	6956100000	0.861177	1.03057	0.903403	0.928287	1.11065	0.932131	0.498146	0.940788
E2R2K8;F6XDS1	E2R2K8;F6XDS1	tr|E2R2K8|E2R2K8_CANLF Protein phosphatase 1 regulatory subunit 10 OS=Canis lupus familiaris GN=PPP1R10 PE=4 SV=1;tr|F6XDS1|F6XDS1_CANLF Protein phosphatase 1 regulatory subunit 10 OS=Canis lupus familiaris GN=PPP1R10 PE=4 SV=1	2	5	5	5	6.3	99.057	940	10.513	207040000	0.871649	0	1.05431	1.02965	0	1.04896	0.919887	0.926558
E2R2L2	E2R2L2	tr|E2R2L2|E2R2L2_CANLF Serine/threonine-protein kinase mTOR OS=Canis lupus familiaris GN=MTOR PE=3 SV=1	1	2	2	2	0.9	288.93	2550	7.8788	75098000	1.38151	1.10313	1.04622	0.906169	0.934458	1.0079	0.102807	1.23954
E2R2M6	E2R2M6	tr|E2R2M6|E2R2M6_CANLF Replication factor C subunit 4 OS=Canis lupus familiaris GN=RFC4 PE=4 SV=1	1	3	3	3	8.8	39.642	363	4.891	178810000	0.955091	1.0738	1.09193	1.0453	1.06513	0.864168	0.561109	1.04916
E2R2N8	E2R2N8	tr|E2R2N8|E2R2N8_CANLF Mitochondrial ribosomal protein L41 OS=Canis lupus familiaris GN=MRPL41 PE=4 SV=1	1	2	2	2	14.1	15.277	135	4.5737	133440000	0.904764	0.693531	0.99271	0.932239	0.966591	1.01885	0.30337	0.888036
E2R2P0;J9P5F4;F1P6C5	E2R2P0	tr|E2R2P0|E2R2P0_CANLF Nucleoporin 62 OS=Canis lupus familiaris GN=NUP62 PE=4 SV=1	3	6	6	6	16.3	53.735	527	45.783	1583600000	0.933519	0.988792	1.00641	0.903932	0.81947	1.00022	0.293936	1.0753
E2R2U3	E2R2U3	tr|E2R2U3|E2R2U3_CANLF Uncharacterized protein OS=Canis lupus familiaris GN=DHX15 PE=4 SV=1	1	20	20	20	27.9	91.034	795	66.192	7992300000	0.910924	0.923901	0.887631	0.991642	0.971238	1.13095	0.0732849	0.879962
E2R2V6	E2R2V6	tr|E2R2V6|E2R2V6_CANLF L1 cell adhesion molecule OS=Canis lupus familiaris GN=L1CAM PE=4 SV=1	1	7	7	7	6.4	140.05	1256	16.554	462440000	0.788033	0.77803	0	1.15493	1.04506	0	0.663933	0.711849
E2R2W6	E2R2W6	tr|E2R2W6|E2R2W6_CANLF SBDS, ribosome maturation factor OS=Canis lupus familiaris GN=SBDS PE=4 SV=1	1	7	7	7	27.4	29.051	252	12.912	684800000	1.09836	1.10995	1.11042	1.05363	1.01352	1.1077	0.15689	1.04532
E2R2Z8;F1PKF1	E2R2Z8;F1PKF1	tr|E2R2Z8|E2R2Z8_CANLF Transmembrane protein 30A OS=Canis lupus familiaris GN=TMEM30A PE=4 SV=1;tr|F1PKF1|F1PKF1_CANLF Transmembrane protein 30A OS=Canis lupus familiaris GN=TMEM30A PE=4 SV=2	2	5	5	4	15.2	40.691	361	11.622	263920000	1.01125	0.793142	1.08681	1.03773	1.08583	1.05783	0.33886	0.908782
E2R302	E2R302	tr|E2R302|E2R302_CANLF Aminopeptidase OS=Canis lupus familiaris GN=ERAP1 PE=3 SV=1	1	6	6	6	6.6	107.26	942	10.545	266510000	0.941343	0.913942	1.07435	1.05342	0.928125	0.967668	0.921038	0.993364
E2R311	E2R311	tr|E2R311|E2R311_CANLF UDP-glucose 6-dehydrogenase OS=Canis lupus familiaris GN=UGDH PE=3 SV=1	1	12	12	12	31.8	55.074	494	38.509	2702600000	1.0147	1.0346	1.05931	1.0381	1.0407	1.07679	0.432253	0.985109
E2R325	E2R325	tr|E2R325|E2R325_CANLF Retinol saturase OS=Canis lupus familiaris GN=RETSAT PE=4 SV=1	1	4	4	4	6.7	66.962	608	6.0649	217420000	1.1193	0	0.734315	0.870188	0	0.890248	0.947157	1.05293
E2R341;F6Y8J4;J9P367	E2R341;F6Y8J4;J9P367	tr|E2R341|E2R341_CANLF Protein tyrosine phosphatase type IVA, member 2 OS=Canis lupus familiaris GN=PTP4A2 PE=4 SV=1;tr|F6Y8J4|F6Y8J4_CANLF Protein tyrosine phosphatase type IVA, member 1 OS=Canis lupus familiaris GN=PTP4A1 PE=4 SV=1;tr|J9P367|J9P367_CANLF	3	2	2	2	13.8	19.079	167	4.6017	202620000	1.05479	1.45935	1.16146	0.810284	0.9731	0.70739	0.0514196	1.47569
E2R3A4;J9P9B1	E2R3A4;J9P9B1	tr|E2R3A4|E2R3A4_CANLF Mitochondrial translational initiation factor 2 OS=Canis lupus familiaris GN=MTIF2 PE=3 SV=1;tr|J9P9B1|J9P9B1_CANLF Mitochondrial translational initiation factor 2 OS=Canis lupus familiaris GN=MTIF2 PE=4 SV=1	2	3	3	3	3.3	81.485	727	3.1822	61899000	0.996732	0.790765	0	1.05841	0.952928	0	0.877275	0.888712
E2R3C8	E2R3C8	tr|E2R3C8|E2R3C8_CANLF YTH domain containing 1 OS=Canis lupus familiaris GN=YTHDC1 PE=4 SV=1	1	2	2	2	2.9	85.092	730	6.4017	168720000	1.0098	0	0.88735	0.916494	0	1.10307	0.934474	0.939387
J9P1D0;F1Q444;E2R3D3;J9P5U8;J9P4F7;J9P774;J9NUV8;J9P101;F1PYW6	J9P1D0;F1Q444;E2R3D3;J9P5U8;J9P4F7	tr|J9P1D0|J9P1D0_CANLF Uncharacterized protein OS=Canis lupus familiaris GN=LOC106559787 PE=3 SV=1;tr|F1Q444|F1Q444_CANLF Uncharacterized protein OS=Canis lupus familiaris PE=3 SV=2;tr|E2R3D3|E2R3D3_CANLF Ribosomal protein L17 OS=Canis lupus familiaris GN=	9	5	5	5	30.4	21.337	184	56.503	19625000000	1.17752	1.04681	0.917522	1.09503	1.15005	1.03272	0.611406	0.958524
J9NU83;E2R3E1	J9NU83;E2R3E1	tr|J9NU83|J9NU83_CANLF RNA binding motif protein 34 OS=Canis lupus familiaris GN=RBM34 PE=4 SV=1;tr|E2R3E1|E2R3E1_CANLF RNA binding motif protein 34 OS=Canis lupus familiaris GN=RBM34 PE=4 SV=1	2	3	3	3	9.6	38.997	344	5.9922	436370000	0.991456	0	1.12043	0.954079	0	1.07301	0.956809	1.04183
J9NXH0;E2R3F9	J9NXH0;E2R3F9	tr|J9NXH0|J9NXH0_CANLF ATP binding cassette subfamily F member 1 OS=Canis lupus familiaris GN=ABCF1 PE=4 SV=1;tr|E2R3F9|E2R3F9_CANLF ATP binding cassette subfamily F member 1 OS=Canis lupus familiaris GN=ABCF1 PE=4 SV=2	2	9	9	9	15.2	89.388	787	38.91	2101200000	1.02053	1.04223	1.06268	1.01467	0.926071	1.04511	0.284894	1.04675
E2R3G8	E2R3G8	tr|E2R3G8|E2R3G8_CANLF Transcription initiation factor IIA subunit 2 OS=Canis lupus familiaris GN=GTF2A2 PE=3 SV=1	1	3	3	3	21.1	12.473	109	3.7848	151200000	0.963881	1.08512	0	1.13685	1.03132	0	0.940417	0.945037
E2R3I8;J9P7K1	E2R3I8	tr|E2R3I8|E2R3I8_CANLF Uncharacterized protein OS=Canis lupus familiaris GN=CRYZ PE=4 SV=2	2	4	4	4	18.2	36.159	336	30.639	265850000	1.10289	1.03609	1.15231	0.831534	1.04783	0.761591	0.0790809	1.24625
E2R3J4	E2R3J4	tr|E2R3J4|E2R3J4_CANLF Cilia and flagella associated protein 20 OS=Canis lupus familiaris GN=CFAP20 PE=4 SV=1	1	3	3	3	16.1	22.748	193	5.083	180570000	0.919162	1.04012	0.985716	1.05311	0.967776	1.08833	0.335455	0.947182
E2R3L8;F1PXH9	E2R3L8;F1PXH9	tr|E2R3L8|E2R3L8_CANLF Double PHD fingers 2 OS=Canis lupus familiaris GN=DPF2 PE=4 SV=2;tr|F1PXH9|F1PXH9_CANLF Double PHD fingers 2 OS=Canis lupus familiaris GN=DPF2 PE=4 SV=2	2	5	5	5	16.6	44.155	391	17.031	519130000	0.886662	1.18258	0.946171	0.954922	0.977504	1.27141	0.668723	0.941188
F6XPR6;E2R3N7	F6XPR6;E2R3N7	tr|F6XPR6|F6XPR6_CANLF Uncharacterized protein OS=Canis lupus familiaris PE=4 SV=1;tr|E2R3N7|E2R3N7_CANLF Uncharacterized protein OS=Canis lupus familiaris GN=THUMPD3 PE=4 SV=1	2	1	1	1	2.7	46.37	411	2.0713	115990000	1.04729	1.01997	1.27859	0.991789	0.983686	0.919864	0.152503	1.1556
E2R3R2	E2R3R2	tr|E2R3R2|E2R3R2_CANLF Proteasome subunit beta type OS=Canis lupus familiaris GN=PSMB5 PE=3 SV=1	1	9	9	8	33.8	28.534	263	38.881	10703000000	1.02333	0.954467	1.05338	1.06204	1.0309	1.082	0.218237	0.95472
F1PD30;E2R3S9	F1PD30;E2R3S9	tr|F1PD30|F1PD30_CANLF Tubulin folding cofactor E OS=Canis lupus familiaris GN=TBCE PE=4 SV=2;tr|E2R3S9|E2R3S9_CANLF Tubulin folding cofactor E OS=Canis lupus familiaris GN=TBCE PE=4 SV=2	2	2	2	2	4.4	59.167	528	4.1679	29456000	1.11503	0	1.12479	0.869289	0	0.977965	0.800623	1.21251
E2R3T1	E2R3T1	tr|E2R3T1|E2R3T1_CANLF RAB, member of RAS oncogene family like 3 OS=Canis lupus familiaris GN=RABL3 PE=4 SV=2	1	2	2	2	8.3	29.243	264	4.0412	114670000	0.904378	0	1.11353	1.11591	0	1.11291	0.895947	0.905367
J9PB00;E2R3T9	J9PB00;E2R3T9	tr|J9PB00|J9PB00_CANLF Uncharacterized protein OS=Canis lupus familiaris PE=3 SV=1;tr|E2R3T9|E2R3T9_CANLF Uncharacterized protein OS=Canis lupus familiaris PE=3 SV=1	2	8	8	8	53.7	21.362	190	31.264	7133400000	0.957098	0.891737	1.00544	0.942291	0.909194	0.980202	0.855603	1.00798
E2R3V2	E2R3V2	tr|E2R3V2|E2R3V2_CANLF LSM8 homolog, U6 small nuclear RNA associated OS=Canis lupus familiaris GN=LSM8 PE=4 SV=2	1	3	3	3	33.3	10.62	99	41.072	970890000	0.872547	0.90499	0	1.14276	1.10254	0	0.760404	0.791673
E2R3V7	E2R3V7	tr|E2R3V7|E2R3V7_CANLF Mitochondrial antiviral signaling protein OS=Canis lupus familiaris GN=MAVS PE=4 SV=2	1	6	6	6	19.8	54.541	520	32.904	526990000	1.04011	1.53908	0.962399	1.14363	0.913912	1.09546	0.540372	1.12324
E2R3X6;J9JHG9	E2R3X6;J9JHG9	tr|E2R3X6|E2R3X6_CANLF Membrane bound O-acyltransferase domain containing 7 OS=Canis lupus familiaris GN=MBOAT7 PE=3 SV=1;tr|J9JHG9|J9JHG9_CANLF Membrane bound O-acyltransferase domain containing 7 OS=Canis lupus familiaris GN=MBOAT7 PE=3 SV=1	2	3	3	3	8.7	52.589	472	13.858	314770000	1.02937	1.26533	0.854608	1.05172	0.985034	0.92501	0.641959	1.06332
J9P6U5;E2R422	J9P6U5;E2R422	tr|J9P6U5|J9P6U5_CANLF ALG5, dolichyl-phosphate beta-glucosyltransferase OS=Canis lupus familiaris GN=ALG5 PE=4 SV=1;tr|E2R422|E2R422_CANLF ALG5, dolichyl-phosphate beta-glucosyltransferase OS=Canis lupus familiaris GN=ALG5 PE=4 SV=2	2	3	3	3	11.7	33.639	291	7.5701	295470000	0.966131	0.915219	1.32017	1.03508	0.951354	1.19312	0.962348	1.00691
E2R427	E2R427	tr|E2R427|E2R427_CANLF Rho guanine nucleotide exchange factor 7 OS=Canis lupus familiaris GN=ARHGEF7 PE=4 SV=2	1	3	3	3	5.4	81.6	723	5.962	98030000	1.19614	1.27278	0.494904	0.810336	0.735038	0.276956	0.271285	1.62639
J9P7H5;E2R434	J9P7H5;E2R434	tr|J9P7H5|J9P7H5_CANLF Catenin delta 1 OS=Canis lupus familiaris GN=CTNND1 PE=4 SV=1;tr|E2R434|E2R434_CANLF Catenin delta 1 OS=Canis lupus familiaris GN=CTNND1 PE=4 SV=2	2	24	24	24	35.3	96.596	867	310.46	7457100000	0.946904	1.0665	0.972098	1.06885	1.08783	1.0759	0.0889155	0.923564
E2R436	E2R436	tr|E2R436|E2R436_CANLF Replication protein A subunit OS=Canis lupus familiaris GN=RPA1 PE=3 SV=1	1	7	7	7	11.5	68.407	616	16.243	942590000	1.11292	0.962324	1.06859	1.03086	1.08873	1.06325	0.798751	0.987745
E2R440	E2R440	tr|E2R440|E2R440_CANLF CWC27 spliceosome associated protein homolog OS=Canis lupus familiaris GN=CWC27 PE=4 SV=2	1	1	1	1	2.8	53.49	472	2.2253	45506000	0.790258	0	0.788079	1.02352	0	1.08707	0.707178	0.747818
E2R479	E2R479	tr|E2R479|E2R479_CANLF Cleavage stimulation factor subunit 3 OS=Canis lupus familiaris GN=CSTF3 PE=4 SV=1	1	7	7	7	9.8	82.917	717	13.62	443790000	0.949046	1.07666	1.14254	1.05675	0.865509	1.09513	0.60969	1.05
E2R488	E2R488	tr|E2R488|E2R488_CANLF Nucleoporin 37 OS=Canis lupus familiaris GN=NUP37 PE=4 SV=1	1	6	6	5	19.3	36.651	326	14.44	388740000	0.899891	1.02068	0.889449	1.01096	1.00885	1.06142	0.117773	0.911982
E2R496	E2R496	tr|E2R496|E2R496_CANLF Cleavage and polyadenylation specific factor 2 OS=Canis lupus familiaris GN=CPSF2 PE=4 SV=1	1	6	6	6	9.8	88.488	782	19.617	350000000	0.855211	0.911316	0.847223	1.01161	0.874217	1.22502	0.186425	0.840204
E2R4A5	E2R4A5	tr|E2R4A5|E2R4A5_CANLF RAD23 homolog B, nucleotide excision repair protein OS=Canis lupus familiaris GN=RAD23B PE=4 SV=2	1	8	8	6	26.4	42.996	406	40.027	3864300000	1.12329	1.28527	1.22561	1.12391	0.898908	0.9888	0.0618886	1.20671
E2R4B2	E2R4B2	tr|E2R4B2|E2R4B2_CANLF Transformer 2 alpha homolog OS=Canis lupus familiaris GN=TRA2A PE=4 SV=2	1	2	2	2	9.7	32.156	278	195.49	690510000	0.717466	0.701794	0	1.04497	0.853489	0	0.709321	0.747585
E2R4C1	E2R4C1	tr|E2R4C1|E2R4C1_CANLF Mannose-6-phosphate receptor, cation dependent OS=Canis lupus familiaris GN=M6PR PE=4 SV=1	1	4	4	4	9.6	43.246	396	21.346	984120000	0.878422	1.12379	0.91552	1.03552	0.848298	1.05899	0.938242	0.991479
E2R4C9	E2R4C9	tr|E2R4C9|E2R4C9_CANLF CTTNBP2 N-terminal like OS=Canis lupus familiaris GN=CTTNBP2NL PE=4 SV=1	1	2	2	2	3.1	69.916	639	3.7176	142180000	0.81859	1.78594	0.916406	1.29227	0.93389	1.44535	0.890665	0.958988
E2R4D5	E2R4D5	tr|E2R4D5|E2R4D5_CANLF Seryl-tRNA synthetase OS=Canis lupus familiaris GN=SARS PE=4 SV=1	1	9	9	9	19.3	58.558	513	20.18	2553600000	1.18068	1.07324	1.0919	1.08913	0.961277	0.985179	0.114386	1.1022
E2R4F5	E2R4F5	tr|E2R4F5|E2R4F5_CANLF 60S ribosomal protein L13 OS=Canis lupus familiaris GN=RPL13 PE=3 SV=1	1	8	8	8	37.4	24.289	211	133.23	40158000000	1.10499	1.16733	1.0047	0.943581	1.02711	0.986656	0.115517	1.10809
E2R4F6	E2R4F6	tr|E2R4F6|E2R4F6_CANLF Mannosyl (alpha-1,3-)-glycoprotein beta-1,4-N-acetylglucosaminyltransferase, isozyme B OS=Canis lupus familiaris GN=MGAT4B PE=4 SV=2	1	3	3	3	6.8	63.277	548	13.879	94032000	1.07413	1.18101	0.728205	1.0062	0.899792	0.866509	0.648834	1.07605
E2R4F8;E2RD75	E2R4F8;E2RD75	tr|E2R4F8|E2R4F8_CANLF NADH:ubiquinone oxidoreductase core subunit S1 OS=Canis lupus familiaris GN=NDUFS1 PE=3 SV=1;tr|E2RD75|E2RD75_CANLF NADH:ubiquinone oxidoreductase core subunit S1 OS=Canis lupus familiaris GN=NDUFS1 PE=3 SV=1	2	21	21	21	35.9	79.678	727	222.24	4921200000	1.05799	1.02052	1.06393	0.937319	0.898022	0.95766	0.00627075	1.12511
E2R4G8;F6Y460	E2R4G8;F6Y460	tr|E2R4G8|E2R4G8_CANLF Ubiquitin like modifier activating enzyme 3 OS=Canis lupus familiaris GN=UBA3 PE=4 SV=1;tr|F6Y460|F6Y460_CANLF Ubiquitin like modifier activating enzyme 3 OS=Canis lupus familiaris GN=UBA3 PE=4 SV=1	2	2	2	2	5.8	51.806	463	6.1246	128600000	1.08701	1.30631	0	0.971421	0.864421	0	0.732856	1.30367
E2R4H4	E2R4H4	tr|E2R4H4|E2R4H4_CANLF Proteasome endopeptidase complex OS=Canis lupus familiaris GN=PSMA5 PE=3 SV=2	1	4	4	4	29	20.035	183	40.831	8726300000	1.11329	1.05707	1.1682	1.07836	0.971351	0.921468	0.095311	1.12365
E2R4I1	E2R4I1	tr|E2R4I1|E2R4I1_CANLF PRA1 family protein OS=Canis lupus familiaris GN=ARL6IP5 PE=3 SV=2	1	3	3	3	19.5	21.871	190	17.67	3483900000	0.832963	0.955409	1.07221	1.01134	1.032	1.07228	0.299324	0.918141
E2R4J2	E2R4J2	tr|E2R4J2|E2R4J2_CANLF Uncharacterized protein OS=Canis lupus familiaris GN=TMPO PE=4 SV=1	1	12	12	12	36.3	50.512	454	83.495	5740800000	0.920615	0.897024	0.917543	1.02721	1.03581	1.09172	0.00289976	0.867006
E2R4L7	E2R4L7	tr|E2R4L7|E2R4L7_CANLF Serine hydroxymethyltransferase OS=Canis lupus familiaris GN=SHMT2 PE=3 SV=2	1	19	19	19	44.1	59.026	531	119.24	19620000000	0.922412	0.906448	0.98951	1.01699	1.08745	1.06379	0.0236896	0.889571
E2R4N7	E2R4N7	tr|E2R4N7|E2R4N7_CANLF 40S ribosomal protein S12 OS=Canis lupus familiaris GN=RPS12 PE=3 SV=1	1	6	6	6	53	14.515	132	20.466	29548000000	1.03598	1.0565	1.06072	1.11216	1.08039	1.11585	0.0190591	0.953089
E2R4P0	E2R4P0	tr|E2R4P0|E2R4P0_CANLF Mediator of RNA polymerase II transcription subunit 1 OS=Canis lupus familiaris GN=MED1 PE=3 SV=1	1	2	2	2	1.1	168.64	1583	2.7301	57570000	1.01812	1.07409	1.09947	0.943512	1.01837	0.940278	0.0511819	1.09976
E2R4Q2	E2R4Q2	tr|E2R4Q2|E2R4Q2_CANLF Syntaxin 7 OS=Canis lupus familiaris GN=STX7 PE=3 SV=2	1	4	4	4	17.2	29.74	261	14.497	416450000	1.03084	0.980683	1.03	0.970637	1.3815	0.993852	0.491838	0.909004
E2R4R3;J9P631;E2RK56	E2R4R3	tr|E2R4R3|E2R4R3_CANLF mRNA cap guanine-N7 methyltransferase OS=Canis lupus familiaris GN=RNMT PE=3 SV=1	3	6	6	6	12.8	55.231	478	18.212	572430000	0.984543	0.814876	0.969423	1.02472	1.07259	1.17498	0.0746285	0.846149
E2R4R9	E2R4R9	tr|E2R4R9|E2R4R9_CANLF Fatty acyl-CoA reductase OS=Canis lupus familiaris GN=FAR1 PE=3 SV=2	1	5	5	5	11.3	59.421	514	17.183	342570000	1.01296	1.39937	0.990051	1.0085	0.977871	1.16821	0.600114	1.07855
E2R4S0	E2R4S0	tr|E2R4S0|E2R4S0_CANLF Anaphase promoting complex subunit 5 OS=Canis lupus familiaris GN=ANAPC5 PE=4 SV=1	1	2	2	2	2.1	85.088	755	3.4229	56453000	0.918974	0.916026	0	0.984082	1.05679	0	0.888125	0.899127
E2R4T4	E2R4T4	tr|E2R4T4|E2R4T4_CANLF Ribosome-releasing factor 2, mitochondrial OS=Canis lupus familiaris GN=GFM2 PE=3 SV=2	1	1	1	1	1.9	86.222	780	3.9662	54046000	1.00341	1.03374	0	0.948033	0.997296	0	0.951179	1.0472
E2R4T7;E2R4T5	E2R4T7;E2R4T5	tr|E2R4T7|E2R4T7_CANLF Hydroxysteroid 17-beta dehydrogenase 4 OS=Canis lupus familiaris GN=HSD17B4 PE=4 SV=2;tr|E2R4T5|E2R4T5_CANLF Hydroxysteroid 17-beta dehydrogenase 4 OS=Canis lupus familiaris GN=HSD17B4 PE=4 SV=2	2	19	19	19	32.6	79.689	737	216.05	7915300000	0.978397	1.03225	1.10684	0.919205	0.948701	0.93545	0.0518597	1.11205
E2R5S2;E2R4U9	E2R5S2;E2R4U9	tr|E2R5S2|E2R5S2_CANLF B-cell receptor associated protein 31 OS=Canis lupus familiaris GN=BCAP31 PE=4 SV=1;tr|E2R4U9|E2R4U9_CANLF B-cell receptor associated protein 31 OS=Canis lupus familiaris GN=BCAP31 PE=4 SV=2	2	11	11	11	35	28.059	246	27.603	10605000000	1.02692	1.09499	0.962351	0.886285	1.06549	0.856043	0.290686	1.09846
E2R4V6;F1PN31	E2R4V6	tr|E2R4V6|E2R4V6_CANLF Nucleoporin 98 OS=Canis lupus familiaris GN=NUP98 PE=4 SV=2	2	21	21	21	13.9	195.74	1800	55.986	1882600000	0.944954	0.960812	0.917953	1.01666	0.854482	1.06041	0.603653	0.963215
J9NY36;E2R4W1	J9NY36;E2R4W1	tr|J9NY36|J9NY36_CANLF Family with sequence similarity 98 member A OS=Canis lupus familiaris GN=FAM98A PE=4 SV=1;tr|E2R4W1|E2R4W1_CANLF Family with sequence similarity 98 member A OS=Canis lupus familiaris GN=FAM98A PE=4 SV=2	2	4	4	4	11.2	55.248	517	121.91	389360000	0.873136	1.60114	0.96667	0.977328	0.662421	1.11418	0.436107	1.24947
E2R4W9	E2R4W9	tr|E2R4W9|E2R4W9_CANLF RAB3 GTPase activating non-catalytic protein subunit 2 OS=Canis lupus familiaris GN=RAB3GAP2 PE=4 SV=2	1	9	9	9	7.5	171.16	1540	28.064	514360000	0.946664	1.05931	1.07815	1.03695	1.05108	1.15475	0.393498	0.951074
E2R4X3	E2R4X3	tr|E2R4X3|E2R4X3_CANLF Dolichyl-diphosphooligosaccharide--protein glycosyltransferase subunit DAD1 OS=Canis lupus familiaris GN=DAD1 PE=3 SV=2	1	2	2	2	18.5	13.11	119	18.836	2173600000	1.14138	1.17682	1.02319	0.952141	0.773292	1.02444	0.0883469	1.21511
E2R4X9	E2R4X9	tr|E2R4X9|E2R4X9_CANLF Pre-mRNA processing factor 8 OS=Canis lupus familiaris GN=PRPF8 PE=4 SV=2	1	46	46	46	23.8	273.6	2335	220.76	12724000000	0.906984	0.941672	0.914234	1.00801	0.980241	1.06976	0.025976	0.903493
E2R4Y4;E2RB53;F1PAE3	E2R4Y4;E2RB53;F1PAE3	tr|E2R4Y4|E2R4Y4_CANLF Glycogen synthase kinase 3 beta OS=Canis lupus familiaris GN=GSK3B PE=3 SV=1;tr|E2RB53|E2RB53_CANLF Glycogen synthase kinase 3 beta OS=Canis lupus familiaris GN=GSK3B PE=3 SV=1;tr|F1PAE3|F1PAE3_CANLF Glycogen synthase kinase 3 alpha	3	6	6	6	20.5	46.714	420	14.337	227790000	1.19077	1.11906	1.11671	0.97338	1.01299	1.04344	0.0139438	1.13094
E2R4Y6	E2R4Y6	tr|E2R4Y6|E2R4Y6_CANLF Eukaryotic translation initiation factor 3 subunit K OS=Canis lupus familiaris GN=EIF3K PE=3 SV=1	1	9	9	9	47.7	25.073	218	36.942	2726100000	0.904377	1.11974	0.963373	1.11547	1.02068	1.0404	0.42155	0.940481
E2R501	E2R501	tr|E2R501|E2R501_CANLF COP9 signalosome subunit 7B OS=Canis lupus familiaris GN=COPS7B PE=4 SV=1	1	3	3	3	16.3	29.595	264	10.469	91717000	1.04006	1.27651	1.04631	0.919177	0.688141	1.09224	0.190787	1.24571
E2R503	E2R503	tr|E2R503|E2R503_CANLF NADH dehydrogenase [ubiquinone] 1 alpha subcomplex subunit 2 OS=Canis lupus familiaris GN=NDUFA2 PE=4 SV=1	1	3	3	3	31.3	10.875	99	42.239	685670000	1.02718	1.03383	1.08385	0.963469	0.915468	0.993899	0.0352958	1.09469
J9P8P4;E2R511	J9P8P4;E2R511	tr|J9P8P4|J9P8P4_CANLF DnaJ heat shock protein family (Hsp40) member A3 OS=Canis lupus familiaris GN=DNAJA3 PE=3 SV=1;tr|E2R511|E2R511_CANLF DnaJ heat shock protein family (Hsp40) member A3 OS=Canis lupus familiaris GN=DNAJA3 PE=3 SV=2	2	3	3	3	10.4	49.106	453	32.544	786800000	0.956314	1.17197	0.978032	0.8786	0.941415	1.1524	0.699313	1.04505
E2R513	E2R513	tr|E2R513|E2R513_CANLF Heme oxygenase 2 OS=Canis lupus familiaris GN=HMOX2 PE=4 SV=1	1	10	10	8	32.9	35.914	316	18.619	1265000000	0.870782	0.941901	0.936963	0.94128	1.02443	1.23383	0.171005	0.859388
E2R514	E2R514	tr|E2R514|E2R514_CANLF NADH dehydrogenase [ubiquinone] flavoprotein 1, mitochondrial OS=Canis lupus familiaris GN=NDUFV1 PE=3 SV=1	1	8	8	8	18.3	50.763	464	18.74	1152800000	0.958003	1.01642	1.04933	0.978035	0.934397	0.960574	0.164406	1.05247
E2R516;E2R920;E2RPM2	E2R516	tr|E2R516|E2R516_CANLF Synaptosomal-associated protein OS=Canis lupus familiaris GN=SNAP23 PE=3 SV=1	3	4	4	4	26.5	23.413	211	16.455	270080000	0.86332	0.922918	0	0.968611	1.08223	0	0.855677	0.87098
E2R518	E2R518	tr|E2R518|E2R518_CANLF Propionyl-CoA carboxylase alpha subunit OS=Canis lupus familiaris GN=PCCA PE=4 SV=2	1	5	5	5	8.5	80.877	731	9.851	281120000	1.01509	0.788056	1.1237	0.893976	0.922459	0.97637	0.683389	1.04799
E2R541	E2R541	tr|E2R541|E2R541_CANLF Apoptosis inducing factor mitochondria associated 1 OS=Canis lupus familiaris GN=AIFM1 PE=4 SV=1	1	14	14	14	24.6	66.835	613	71.583	7394500000	0.946846	1.007	0.893701	0.979667	1.00309	1.09134	0.184791	0.926301
E2R546;J9JHV8;F1PVZ2;Q28346;J9P0P0	E2R546;J9JHV8;F1PVZ2;Q28346;J9P0P0	tr|E2R546|E2R546_CANLF Uncharacterized protein OS=Canis lupus familiaris PE=4 SV=2;tr|J9JHV8|J9JHV8_CANLF Uncharacterized protein OS=Canis lupus familiaris GN=LOC100856765 PE=4 SV=1;tr|F1PVZ2|F1PVZ2_CANLF Uncharacterized protein OS=Canis lupus familiaris P	5	18	18	18	47.1	46.241	412	91.83	65504000000	1.04138	0.948418	1.02105	0.973451	1.03858	1.08932	0.529024	0.970815
E2R561	E2R561	tr|E2R561|E2R561_CANLF NSF attachment protein gamma OS=Canis lupus familiaris GN=NAPG PE=4 SV=1	1	5	5	5	16.4	34.588	311	17.773	218470000	0.980502	1.48411	1.19017	1.02774	0.759949	1.08259	0.213252	1.27332
E2R574;J9PAV3;J9NZS4;J9P5B4;J9NZK9	E2R574;J9PAV3;J9NZS4	tr|E2R574|E2R574_CANLF Uncharacterized protein OS=Canis lupus familiaris GN=EEF1G PE=4 SV=1;tr|J9PAV3|J9PAV3_CANLF Uncharacterized protein OS=Canis lupus familiaris PE=3 SV=1;tr|J9NZS4|J9NZS4_CANLF Uncharacterized protein OS=Canis lupus familiaris PE=4 SV=	5	17	17	17	35.2	50.163	437	90.083	50005000000	1.07404	1.1338	1.09642	1.05029	0.980589	1.05874	0.0774441	1.06947
E2R578	E2R578	tr|E2R578|E2R578_CANLF Solute carrier family 25 member 11 OS=Canis lupus familiaris GN=SLC25A11 PE=3 SV=2	1	4	4	4	20.7	34.075	314	22.196	793760000	0.817806	0.9696	0.822497	1.01127	0.943164	1.03228	0.0908171	0.873839
E2R580;J9PA22	E2R580;J9PA22	tr|E2R580|E2R580_CANLF VAMP associated protein A OS=Canis lupus familiaris GN=VAPA PE=4 SV=1;tr|J9PA22|J9PA22_CANLF VAMP associated protein A OS=Canis lupus familiaris GN=VAPA PE=4 SV=1	2	10	10	9	48.6	27.845	249	64.11	18301000000	0.977779	1.07722	1.00987	0.967602	0.929179	1.06949	0.555127	1.03324
E2R5C3	E2R5C3	tr|E2R5C3|E2R5C3_CANLF Mitochondrial ribosomal protein S21 OS=Canis lupus familiaris GN=MRPS21 PE=4 SV=1	1	2	2	2	29.9	10.687	87	6.5065	156250000	1.01233	1.20927	0	0.886603	0.99497	0	0.82827	1.18071
E2R5F1	E2R5F1	tr|E2R5F1|E2R5F1_CANLF Exocyst complex component 8 OS=Canis lupus familiaris GN=EXOC8 PE=4 SV=1	1	3	3	3	5	81.915	727	14.841	156540000	0.912334	0.98639	0.865609	0.91733	0.825109	1.29329	0.572673	0.910599
E2R5F7;E2QU21	E2R5F7;E2QU21	tr|E2R5F7|E2R5F7_CANLF RNA binding protein with multiple splicing OS=Canis lupus familiaris GN=RBPMS PE=4 SV=1;tr|E2QU21|E2QU21_CANLF RNA binding protein with multiple splicing 2 OS=Canis lupus familiaris GN=RBPMS2 PE=4 SV=1	2	2	2	2	8.2	24.276	219	4.6579	111830000	1.14504	1.65133	0	1.06893	0.600713	0	0.55137	1.67483
E2R5G6	E2R5G6	tr|E2R5G6|E2R5G6_CANLF Related RAS viral (r-ras) oncogene homolog OS=Canis lupus familiaris GN=RRAS PE=4 SV=1	1	6	6	5	39	23.566	218	88.134	3969600000	0.934878	0.911965	0.91924	0.955999	0.968857	1.00847	0.0315068	0.942984
E2R5G8	E2R5G8	tr|E2R5G8|E2R5G8_CANLF Striatin interacting protein 1 OS=Canis lupus familiaris GN=STRIP1 PE=4 SV=1	1	2	2	2	2.4	95.45	836	2.016	80963000	0.922403	0	0.870419	1.02286	0	1.04062	0.85277	0.868837
E2R5H4	E2R5H4	tr|E2R5H4|E2R5H4_CANLF Integrin linked kinase OS=Canis lupus familiaris GN=ILK PE=4 SV=1	1	2	2	2	3.8	51.389	452	3.9546	39100000	0.993649	1.5591	1.31823	0.774624	0.770272	1.64437	0.533198	1.21375
E2R5K3	E2R5K3	tr|E2R5K3|E2R5K3_CANLF Pyrroline-5-carboxylate reductase OS=Canis lupus familiaris GN=PYCR2 PE=3 SV=1	1	8	4	4	29.4	33.736	320	18.962	1261400000	1.04376	0.882459	0.984149	1.01527	0.999827	1.09779	0.294852	0.93494
J9P7N1;E2R5K7;F1PDB0	J9P7N1;E2R5K7;F1PDB0	tr|J9P7N1|J9P7N1_CANLF Protein transport protein sec16 OS=Canis lupus familiaris GN=SEC16A PE=3 SV=1;tr|E2R5K7|E2R5K7_CANLF Protein transport protein sec16 OS=Canis lupus familiaris GN=SEC16A PE=3 SV=2;tr|F1PDB0|F1PDB0_CANLF Protein transport protein sec16	3	4	4	4	3.5	161.18	1494	15.956	287630000	1.09211	1.22209	0.972564	1.07642	0.972127	0.940977	0.297931	1.09943
J9P8V7;E2R5M5;J9NUJ4	J9P8V7;E2R5M5	tr|J9P8V7|J9P8V7_CANLF Uncharacterized protein OS=Canis lupus familiaris GN=NACA PE=4 SV=1;tr|E2R5M5|E2R5M5_CANLF Uncharacterized protein OS=Canis lupus familiaris GN=NACA PE=4 SV=1	3	4	4	4	27.8	22.402	205	23.638	8503200000	1.09242	1.18371	1.09826	1.06132	1.00376	1.06099	0.0781857	1.07944
E2R5M7;J9P740	E2R5M7;J9P740	tr|E2R5M7|E2R5M7_CANLF Thioredoxin like 1 OS=Canis lupus familiaris GN=TXNL1 PE=4 SV=2;tr|J9P740|J9P740_CANLF Thioredoxin like 1 OS=Canis lupus familiaris GN=TXNL1 PE=4 SV=1	2	8	8	8	39.8	32.313	289	23.769	1227700000	1.15364	1.0558	0.962382	1.0903	1.04714	0.862491	0.554958	1.0573
E2R5N5	E2R5N5	tr|E2R5N5|E2R5N5_CANLF Proteasome 26S subunit, non-ATPase 13 OS=Canis lupus familiaris GN=PSMD13 PE=4 SV=1	1	16	16	16	50	42.893	376	89.549	7913700000	0.894122	0.96303	1.00768	1.08961	1.03271	1.02967	0.0670595	0.908894
E2R5P9	E2R5P9	tr|E2R5P9|E2R5P9_CANLF Mitochondrial ribosomal protein S27 OS=Canis lupus familiaris GN=MRPS27 PE=4 SV=2	1	7	7	7	15.5	49.508	431	25.303	893140000	1.00559	0.965447	1.03216	1.03487	1.11147	1.07864	0.0661444	0.931231
E2R5Q0;J9NUN4	E2R5Q0	tr|E2R5Q0|E2R5Q0_CANLF Mitochondrial Rho GTPase OS=Canis lupus familiaris GN=RHOT2 PE=3 SV=2	2	3	3	3	8.4	68.427	620	14.23	50073000	1.05561	0	0.890771	1.10012	0	1.09821	0.872663	0.88539
F6XQE7;E2R5Q5	F6XQE7;E2R5Q5	tr|F6XQE7|F6XQE7_CANLF FMR1 autosomal homolog 1 OS=Canis lupus familiaris GN=FXR1 PE=4 SV=1;tr|E2R5Q5|E2R5Q5_CANLF FMR1 autosomal homolog 1 OS=Canis lupus familiaris GN=FXR1 PE=4 SV=2	2	8	8	7	17.1	60.805	539	25.403	1809100000	1.04203	0.970921	0.955023	1.00309	1.01403	1.14494	0.287985	0.938621
E2R5Q8	E2R5Q8	tr|E2R5Q8|E2R5Q8_CANLF Protein YIPF OS=Canis lupus familiaris GN=YIPF5 PE=3 SV=1	1	2	2	2	8.2	28.015	257	4.4114	1131600000	1.13438	0.931052	0.883177	0.888118	0.69337	1.00391	0.366162	1.14049
E2R5R1	E2R5R1	tr|E2R5R1|E2R5R1_CANLF DEAD-box helicase 51 OS=Canis lupus familiaris GN=DDX51 PE=3 SV=2	1	3	3	3	5.5	69.117	631	6.7318	124690000	1.07681	0.974927	0	0.950367	0.896324	0	0.889376	1.11103
E2R5T1	E2R5T1	tr|E2R5T1|E2R5T1_CANLF ER membrane protein complex subunit 4 OS=Canis lupus familiaris GN=EMC4 PE=3 SV=1	1	2	2	2	15.3	20.086	183	7.7252	516630000	0.856179	0.883488	0.666057	0.952352	0.832204	0.714488	0.764287	0.962658
E2R5T2	E2R5T2	tr|E2R5T2|E2R5T2_CANLF Splicing factor 3b subunit 4 OS=Canis lupus familiaris GN=SF3B4 PE=4 SV=1	1	2	2	2	5.2	44.383	424	7.0883	444670000	0.98355	0.937087	0.912086	0.935661	1.07989	0.839832	0.922392	0.992063
E2R5T8	E2R5T8	tr|E2R5T8|E2R5T8_CANLF ASPSCR1, UBX domain containing tether for SLC2A4 OS=Canis lupus familiaris GN=ASPSCR1 PE=4 SV=2	1	3	3	3	6.9	60.658	562	4.4854	141470000	1.03225	0	1.22492	0.74469	0	1.11898	0.807059	1.21114
E2R5T9;L7N071	E2R5T9;L7N071	tr|E2R5T9|E2R5T9_CANLF Actinin alpha 4 OS=Canis lupus familiaris GN=ACTN4 PE=4 SV=1;tr|L7N071|L7N071_CANLF Actinin alpha 4 OS=Canis lupus familiaris GN=ACTN4 PE=4 SV=1	2	50	50	36	59.1	104.93	911	323.31	151000000000	0.983412	1.02704	1.04587	0.994636	1.03987	0.984296	0.645304	1.01243
J9P1Z6;J9P4S4;E2R5V6	J9P1Z6;J9P4S4;E2R5V6	tr|J9P1Z6|J9P1Z6_CANLF Pre-mRNA processing factor 40 homolog A OS=Canis lupus familiaris GN=PRPF40A PE=4 SV=1;tr|J9P4S4|J9P4S4_CANLF Pre-mRNA processing factor 40 homolog A OS=Canis lupus familiaris GN=PRPF40A PE=4 SV=1;tr|E2R5V6|E2R5V6_CANLF Pre-mRNA proc	3	7	7	7	8.6	98.438	860	18.075	1785000000	0.817835	0.954356	0.765626	0.899435	1.10651	1.21177	0.102982	0.788704
E2R5X3	E2R5X3	tr|E2R5X3|E2R5X3_CANLF Mitochondrial ribosomal protein L54 OS=Canis lupus familiaris GN=MRPL54 PE=4 SV=1	1	1	1	1	13.8	15.912	138	2.1625	117970000	0	1.05299	1.01898	0	0.939089	1.12832	0.997676	1.00221
E2R5Z5	E2R5Z5	tr|E2R5Z5|E2R5Z5_CANLF Transmembrane 9 superfamily member OS=Canis lupus familiaris GN=TM9SF2 PE=3 SV=2	1	7	7	7	13.4	75.641	662	20.051	1622900000	0.832664	0.935868	0.83119	0.926912	0.8908	0.855498	0.57629	0.97251
E2R607	E2R607	tr|E2R607|E2R607_CANLF Deoxycytidine kinase OS=Canis lupus familiaris GN=DCK PE=4 SV=1	1	2	2	2	9.2	30.234	260	12.327	148440000	1.15832	0	1.02275	1.26681	0	1.21931	0.862997	0.877298
E2RTL5;E2R608;F1Q0B2	E2RTL5;E2R608;F1Q0B2	tr|E2RTL5|E2RTL5_CANLF MOB kinase activator 1A OS=Canis lupus familiaris GN=MOB1A PE=4 SV=1;tr|E2R608|E2R608_CANLF MOB kinase activator 1B OS=Canis lupus familiaris GN=MOB1B PE=4 SV=2;tr|F1Q0B2|F1Q0B2_CANLF MOB kinase activator 1B OS=Canis lupus familiaris	3	3	3	3	16.7	25.079	216	12.943	1053900000	1.09253	1.24006	1.07078	0.964739	0.934271	1.06461	0.0910601	1.14838
E2R624;F6X6K8	E2R624;F6X6K8	tr|E2R624|E2R624_CANLF Leucine rich pentatricopeptide repeat containing OS=Canis lupus familiaris GN=LRPPRC PE=4 SV=2;tr|F6X6K8|F6X6K8_CANLF Leucine rich pentatricopeptide repeat containing OS=Canis lupus familiaris GN=LRPPRC PE=4 SV=1	2	47	47	46	34.5	157.65	1393	188.89	39499000000	0.904361	0.88974	0.947732	0.972275	0.992153	1.11061	0.0755377	0.891642
E2R635	E2R635	tr|E2R635|E2R635_CANLF Uncharacterized protein OS=Canis lupus familiaris GN=UTP14A PE=4 SV=1	1	10	10	10	13.3	87.976	772	24.261	593390000	0.84626	0.872675	0.68972	1.13248	1.60973	1.00141	0.0829249	0.643402
E2R644;Q9XSR5	E2R644;Q9XSR5	tr|E2R644|E2R644_CANLF RWD domain containing 4 OS=Canis lupus familiaris GN=RWDD4 PE=4 SV=1;tr|Q9XSR5|Q9XSR5_CANLF Uncharacterized protein (Fragment) OS=Canis lupus familiaris PE=2 SV=1	2	2	2	2	12.8	21.26	188	4.9637	58540000	1.05663	0	1.17412	1.04778	0	0.885288	0.851005	1.154
E2R655;F1PXZ3	E2R655	tr|E2R655|E2R655_CANLF Metastasis associated 1 family member 2 OS=Canis lupus familiaris GN=MTA2 PE=4 SV=1	2	14	14	13	24	75.002	668	45.323	2345700000	0.993792	1.00113	0.94116	1.0293	0.965737	1.09915	0.286684	0.948905
E2R667	E2R667	tr|E2R667|E2R667_CANLF Coatomer subunit beta OS=Canis lupus familiaris GN=COPB2 PE=3 SV=1	1	24	24	24	33.6	102.39	906	102.85	7195800000	1.07196	1.0023	1.08927	0.946093	0.906519	0.913313	0.0105707	1.14375
E2R685;F6X895	E2R685;F6X895	tr|E2R685|E2R685_CANLF Solute carrier family 25 member 4 OS=Canis lupus familiaris GN=SLC25A4 PE=3 SV=1;tr|F6X895|F6X895_CANLF Solute carrier family 25 member 4 OS=Canis lupus familiaris GN=SLC25A4 PE=3 SV=1	2	11	4	4	36.1	32.891	299	29.763	2891000000	0.96267	0.97186	1.04746	1.00443	0.9441	1.07211	0.792022	0.987206
E2R6E2	E2R6E2	tr|E2R6E2|E2R6E2_CANLF NADH:ubiquinone oxidoreductase core subunit S7 OS=Canis lupus familiaris GN=NDUFS7 PE=3 SV=1	1	3	3	3	14.4	23.585	216	8.3041	824670000	1.14772	0	1.2035	0.936157	0	0.98229	0.789801	1.22559
J9P0G9;E2R6E8;F1Q461;F1Q458	J9P0G9;E2R6E8;F1Q461;F1Q458	tr|J9P0G9|J9P0G9_CANLF Potassium voltage-gated channel subfamily A regulatory beta subunit 2 OS=Canis lupus familiaris GN=KCNAB2 PE=4 SV=1;tr|E2R6E8|E2R6E8_CANLF Potassium voltage-gated channel subfamily A regulatory beta subunit 2 OS=Canis lupus familiari	4	2	2	2	4.9	40.985	367	1.943	41477000	1.19033	0	1.29768	0.868478	0	0.785082	0.60727	1.50464
E2R6F3	E2R6F3	tr|E2R6F3|E2R6F3_CANLF Mitochondrial ribosomal protein S11 OS=Canis lupus familiaris GN=MRPS11 PE=3 SV=1	1	1	1	1	8.2	20.789	196	10.179	96712000	0.85954	0	1.00532	0.832541	0	0.961345	0.959227	1.03956
E2R6F8	E2R6F8	tr|E2R6F8|E2R6F8_CANLF Mannose-P-dolichol utilization defect 1 OS=Canis lupus familiaris GN=MPDU1 PE=4 SV=1	1	2	2	2	7.7	26.727	246	5.3338	580840000	0.792605	0.929359	0.631103	1.01223	1.68561	0.828293	0.227379	0.667322
E2R6I0	E2R6I0	tr|E2R6I0|E2R6I0_CANLF BCL2L2-PABPN1 readthrough OS=Canis lupus familiaris GN=BCL2L2-PABPN1 PE=4 SV=1	1	5	5	5	23.9	32.902	306	25.141	2358200000	0.955479	0.91176	0.778505	1.09266	0.935894	1.09701	0.100267	0.846485
E2R6J0	E2R6J0	tr|E2R6J0|E2R6J0_CANLF Adaptor protein, phosphotyrosine interacting with PH domain and leucine zipper 1 OS=Canis lupus familiaris GN=APPL1 PE=4 SV=1	1	6	6	6	10.7	79.62	708	11.89	218890000	1.02965	1.13339	1.12235	1.00317	0.963479	1.19766	0.638321	1.03826
E2R6J5	E2R6J5	tr|E2R6J5|E2R6J5_CANLF Ubiquitin specific peptidase 4 OS=Canis lupus familiaris GN=USP4 PE=3 SV=1	1	5	5	4	7.4	108.58	964	17.111	163950000	1.15839	1.0699	0.995149	1.01684	0.946637	0.645502	0.171963	1.23552
E2R6L1	E2R6L1	tr|E2R6L1|E2R6L1_CANLF Tankyrase 1 binding protein 1 OS=Canis lupus familiaris GN=TNKS1BP1 PE=4 SV=1	1	24	24	24	19.3	181.37	1738	62.714	1566200000	1.11755	1.08824	1.07432	1.03391	1.03053	1.03376	0.00903124	1.05871
E2R6N6	E2R6N6	tr|E2R6N6|E2R6N6_CANLF Farnesyl-diphosphate farnesyltransferase 1 OS=Canis lupus familiaris GN=FDFT1 PE=4 SV=1	1	2	2	2	5.3	48.201	417	5.0913	172490000	0.959919	0	1.27059	1.04208	0	1.25108	0.971218	0.97268
E2R6Q7	E2R6Q7	tr|E2R6Q7|E2R6Q7_CANLF Cathepsin B OS=Canis lupus familiaris GN=CTSB PE=3 SV=1	1	7	7	7	27.1	37.685	339	26.895	6219900000	0.958653	1.01745	0.995461	1.03711	0.942221	1.05054	0.637326	0.980754
E2R6R3	E2R6R3	tr|E2R6R3|E2R6R3_CANLF Methylsterol monooxygenase 1 OS=Canis lupus familiaris GN=MSMO1 PE=3 SV=1	1	2	2	2	8.5	35.229	293	7.2661	1192400000	0.867146	1.02303	1.0662	0.981715	0.938445	0.901803	0.526812	1.04763
E2R6S7	E2R6S7	tr|E2R6S7|E2R6S7_CANLF Uncharacterized protein OS=Canis lupus familiaris PE=4 SV=1	1	4	4	4	14.8	32.229	283	9.3204	159010000	1.16339	0	1.2158	0.915058	0	0.868635	0.709467	1.33385
E2R6Z0	E2R6Z0	tr|E2R6Z0|E2R6Z0_CANLF Natriuretic peptide receptor 3 OS=Canis lupus familiaris GN=NPR3 PE=4 SV=2	1	2	2	2	3.2	59.397	537	3.722	182270000	0.733949	0.609132	0.409949	1.08124	1.50456	2.3738	0.0526169	0.353462
E2R702	E2R702	tr|E2R702|E2R702_CANLF CDGSH iron sulfur domain 2 OS=Canis lupus familiaris GN=CISD2 PE=4 SV=1	1	7	7	7	50.4	15.292	135	14.772	1495100000	0.963975	0.922113	1.1329	0.978434	0.882804	1.03909	0.642381	1.04091
F1Q4J0;E2R729	F1Q4J0;E2R729	tr|F1Q4J0|F1Q4J0_CANLF Glucosidase II alpha subunit OS=Canis lupus familiaris GN=GANAB PE=3 SV=2;tr|E2R729|E2R729_CANLF Glucosidase II alpha subunit OS=Canis lupus familiaris GN=GANAB PE=3 SV=1	2	22	22	22	24.3	106.38	944	73.08	12743000000	1.02265	1.00541	1.06512	0.926916	0.977629	0.988501	0.0621349	1.06918
E2R764	E2R764	tr|E2R764|E2R764_CANLF Dynein light chain roadblock OS=Canis lupus familiaris GN=DYNLRB1 PE=3 SV=1	1	3	3	3	37.5	10.99	96	25.978	421900000	1.027	1.13238	1.01426	1.22411	1.26909	1.02126	0.251984	0.903027
E2R775	E2R775	tr|E2R775|E2R775_CANLF Mitochondrial ribosomal protein L37 OS=Canis lupus familiaris GN=MRPL37 PE=4 SV=1	1	3	3	3	7.8	48.348	423	4.1102	165330000	1.22046	0.775804	0.858263	1.16592	0.885274	0.989406	0.716764	0.938804
E2R798	E2R798	tr|E2R798|E2R798_CANLF Mitochondrial ribosomal protein S34 OS=Canis lupus familiaris GN=MRPS34 PE=4 SV=2	1	5	5	5	23.6	25.413	216	14.194	346920000	0.950474	0.923816	0.978128	0.902661	0.980844	1.1042	0.498943	0.954718
E2R7A0;J9NVH3	E2R7A0;J9NVH3	tr|E2R7A0|E2R7A0_CANLF Hydroxyacylglutathione hydrolase OS=Canis lupus familiaris GN=HAGH PE=3 SV=2;tr|J9NVH3|J9NVH3_CANLF Hydroxyacylglutathione hydrolase OS=Canis lupus familiaris GN=HAGH PE=3 SV=1	2	4	4	4	17.8	33.875	309	9.677	130890000	1.23906	0	1.14607	0.81349	0	0.921666	0.683205	1.37459
E2R7F3;J9NYF6;H9GWA4	E2R7F3;J9NYF6;H9GWA4	tr|E2R7F3|E2R7F3_CANLF DnaJ heat shock protein family (Hsp40) member A2 OS=Canis lupus familiaris GN=DNAJA2 PE=3 SV=2;tr|J9NYF6|J9NYF6_CANLF DnaJ heat shock protein family (Hsp40) member A2 OS=Canis lupus familiaris GN=DNAJA2 PE=4 SV=1;tr|H9GWA4|H9GWA4_CAN	3	9	9	9	22.5	45.859	413	22.971	2834200000	1.02541	0.996199	0.984943	1.00002	0.980536	1.05349	0.731639	0.990937
E2R7K5	E2R7K5	tr|E2R7K5|E2R7K5_CANLF Adaptor related protein complex 1 gamma 2 subunit OS=Canis lupus familiaris GN=AP1G2 PE=4 SV=1	1	7	7	7	9.1	87.304	787	21.03	692960000	0.968448	0.92229	1.02444	1.04783	0.972645	1.04643	0.260151	0.950529
E2R7K6	E2R7K6	tr|E2R7K6|E2R7K6_CANLF Uncharacterized protein OS=Canis lupus familiaris GN=VPS33A PE=3 SV=2	1	2	2	2	3.2	67.722	597	2.8172	84048000	0.885134	0	0.851675	1.34686	0	0.959359	0.720425	0.753099
E2R7L0	E2R7L0	tr|E2R7L0|E2R7L0_CANLF Replication factor C subunit 3 OS=Canis lupus familiaris GN=RFC3 PE=4 SV=1	1	4	4	4	14.6	40.557	356	8.8084	225610000	0.793101	1.04493	0.999115	1.06807	1.03139	1.29493	0.175848	0.835834
E2R7L1	E2R7L1	tr|E2R7L1|E2R7L1_CANLF Protein disulfide-isomerase A4 OS=Canis lupus familiaris GN=PDIA4 PE=3 SV=2	1	29	29	29	48.9	72.395	642	278.85	44032000000	1.07684	1.10177	1.11127	0.919418	0.897723	0.966603	0.00177249	1.18182
E2R7M2	E2R7M2	tr|E2R7M2|E2R7M2_CANLF Cytochrome c heme lyase OS=Canis lupus familiaris GN=HCCS PE=3 SV=1	1	3	3	3	15.8	31.069	272	8.1579	29727000	0	0.887827	0.848934	0	0.676431	1.29694	0.875784	0.8801
J9NVL5;E2R7N6	J9NVL5;E2R7N6	tr|J9NVL5|J9NVL5_CANLF Cell adhesion molecule L1 like OS=Canis lupus familiaris GN=CHL1 PE=4 SV=1;tr|E2R7N6|E2R7N6_CANLF Cell adhesion molecule L1 like OS=Canis lupus familiaris GN=CHL1 PE=4 SV=2	2	1	1	1	0.8	135.08	1209	2.0223	2663900000	1.11753	1.37507	0.955598	0.945977	0.967937	0.970032	0.199123	1.19566
E2R7P6	E2R7P6	tr|E2R7P6|E2R7P6_CANLF Thyroid hormone receptor associated protein 3 OS=Canis lupus familiaris GN=THRAP3 PE=4 SV=1	1	20	20	19	22.7	109.06	958	66.047	5784500000	0.935867	1.03133	0.837578	1.0928	0.947966	1.11566	0.201243	0.888591
E2R7Q9	E2R7Q9	tr|E2R7Q9|E2R7Q9_CANLF ER membrane protein complex subunit 6 OS=Canis lupus familiaris GN=EMC6 PE=4 SV=1	1	2	2	2	20	12.003	110	4.509	430160000	0.881511	0.889653	0.874799	0.968697	0.967792	0.942171	0.00132508	0.919165
E2R7R0	E2R7R0	tr|E2R7R0|E2R7R0_CANLF Tax1 binding protein 3 OS=Canis lupus familiaris GN=TAX1BP3 PE=4 SV=2	1	2	2	1	25	13.735	124	6.0313	330950000	1.00698	1.18303	1.13023	0.926356	1.00719	1.05731	0.164535	1.11013
E2R7R2	E2R7R2	tr|E2R7R2|E2R7R2_CANLF Cleavage and polyadenylation specific factor 3 OS=Canis lupus familiaris GN=CPSF3 PE=4 SV=2	1	5	5	5	8.4	81.118	717	16.179	160430000	0.895594	0.893021	0.934792	0.946977	1.08776	0.982206	0.0922892	0.902704
E2R7R4	E2R7R4	tr|E2R7R4|E2R7R4_CANLF PDS5 cohesin associated factor A OS=Canis lupus familiaris GN=PDS5A PE=4 SV=1	1	6	5	5	5.2	150.82	1337	28.972	567060000	0.767102	0	0.880399	1.05062	0	1.31344	0.649696	0.696895
E2R7R8	E2R7R8	tr|E2R7R8|E2R7R8_CANLF Structural maintenance of chromosomes protein OS=Canis lupus familiaris GN=SMC2 PE=3 SV=1	1	19	19	19	16.7	134.87	1191	68.177	2213700000	0.995577	0.926325	0.971798	1.07923	1.15134	1.0294	0.04028	0.887647
E2R7R9	E2R7R9	tr|E2R7R9|E2R7R9_CANLF PGAM family member 5, mitochondrial serine/threonine protein phosphatase OS=Canis lupus familiaris GN=PGAM5 PE=4 SV=2	1	5	5	5	13.8	39.477	356	37.455	743550000	0.837381	0.898996	0.864272	0.954988	1.09267	0.983134	0.0347653	0.858075
E2R7S5	E2R7S5	tr|E2R7S5|E2R7S5_CANLF Ribosomal L1 domain containing 1 OS=Canis lupus familiaris GN=RSL1D1 PE=4 SV=2	1	14	14	14	32.2	54.91	490	103.34	9324400000	0.961743	0.884801	0.88449	0.990937	1.13055	1.01565	0.0540067	0.870549
E2R7T4	E2R7T4	tr|E2R7T4|E2R7T4_CANLF Structural maintenance of chromosomes protein OS=Canis lupus familiaris GN=SMC3 PE=3 SV=2	1	27	27	27	25.6	141.54	1217	117.57	3308100000	0.872657	0.894029	0.873854	1.03595	0.954871	1.05431	0.0125943	0.867137
E2R7U2;J9P4H9	E2R7U2;J9P4H9	tr|E2R7U2|E2R7U2_CANLF Keratin 13 OS=Canis lupus familiaris GN=KRT13 PE=3 SV=2;tr|J9P4H9|J9P4H9_CANLF Keratin 13 OS=Canis lupus familiaris GN=KRT13 PE=3 SV=1	2	9	3	1	20.8	47.648	438	4.2434	4637800000	0.903618	0.983683	1.07343	0.93064	1.0411	1.12714	0.572928	0.955422
E2R7V2	E2R7V2	tr|E2R7V2|E2R7V2_CANLF Proteasome assembly chaperone 2 OS=Canis lupus familiaris GN=PSMG2 PE=3 SV=1	1	2	2	2	8	29.411	264	4.8679	261140000	1.28678	1.08384	1.27778	1.1059	0.836028	1.02978	0.0961432	1.22771
E2R7W5	E2R7W5	tr|E2R7W5|E2R7W5_CANLF Mitochondrial ribosomal protein L22 (Fragment) OS=Canis lupus familiaris GN=MRPL22 PE=3 SV=2	1	4	4	4	24.4	21.079	180	15.865	380680000	0.996808	1.03544	0.987654	1.00049	0.87571	1.41226	0.611599	0.918334
E2R801	E2R801	tr|E2R801|E2R801_CANLF Eukaryotic translation initiation factor 2D OS=Canis lupus familiaris GN=EIF2D PE=4 SV=2	1	2	2	2	3.3	64.658	584	3.8461	128410000	0.960636	1.01209	0.926825	1.06035	0.894754	1.08514	0.508654	0.953722
E2R812	E2R812	tr|E2R812|E2R812_CANLF Golgi SNAP receptor complex member 1 OS=Canis lupus familiaris GN=GOSR1 PE=3 SV=1	1	2	2	2	9.6	28.556	250	6.3488	191720000	0.926516	1.07462	0	0.918133	0.820112	0	0.853405	1.15124
E2R830	E2R830	tr|E2R830|E2R830_CANLF Carboxypeptidase D OS=Canis lupus familiaris GN=CPD PE=4 SV=1	1	20	20	20	15.4	152.93	1379	50.859	1594800000	0.944864	0.929751	1.00578	0.970887	0.944111	1.07126	0.47808	0.964551
E2R837	E2R837	tr|E2R837|E2R837_CANLF Ubiquitin like modifier activating enzyme 2 OS=Canis lupus familiaris GN=UBA2 PE=4 SV=2	1	10	10	10	19.4	71.239	640	69.3	2343500000	1.17329	1.14129	1.08032	1.05657	0.951846	0.965882	0.0303342	1.14142
E2R841	E2R841	tr|E2R841|E2R841_CANLF MOB family member 4, phocein OS=Canis lupus familiaris GN=MOB4 PE=4 SV=1	1	5	5	5	26.7	26.032	225	11.88	990110000	1.03452	1.30883	0.795488	0.983171	0.83674	0.720384	0.29734	1.23562
E2R851	E2R851	tr|E2R851|E2R851_CANLF BRISC and BRCA1 A complex member 1 OS=Canis lupus familiaris GN=BABAM1 PE=4 SV=2	1	2	2	2	5.7	37.431	336	3.9572	90830000	0.994537	1.04912	0	0.814018	0.653539	0	0.672802	1.39256
J9P7C4;E2R856	J9P7C4;E2R856	tr|J9P7C4|J9P7C4_CANLF Myeloid derived growth factor OS=Canis lupus familiaris GN=MYDGF PE=4 SV=1;tr|E2R856|E2R856_CANLF Myeloid derived growth factor OS=Canis lupus familiaris GN=MYDGF PE=4 SV=2	2	5	5	5	31.2	18.77	173	13.64	353620000	0.912762	0	1.25638	1.01144	0	1.00028	0.921929	1.07825
E2R869;F1PE14	E2R869;F1PE14	tr|E2R869|E2R869_CANLF KRR1 small subunit processome component OS=Canis lupus familiaris GN=LOC475405 PE=3 SV=2;tr|F1PE14|F1PE14_CANLF KRR1 small subunit processome component OS=Canis lupus familiaris PE=3 SV=2	2	5	5	5	12.6	43.562	380	16.246	473940000	0.813488	1.03873	0.871458	0.978862	1.01653	1.23989	0.182309	0.841867
E2R8A2	E2R8A2	tr|E2R8A2|E2R8A2_CANLF Vacuolar protein sorting-associated protein 29 OS=Canis lupus familiaris GN=VPS29 PE=3 SV=2	1	4	4	4	25	20.277	180	11.335	679330000	1.1188	1.33899	1.05704	1.05095	0.860963	0.944499	0.0971187	1.2305
E2R8A8	E2R8A8	tr|E2R8A8|E2R8A8_CANLF 40S ribosomal protein S7 OS=Canis lupus familiaris GN=RPS7 PE=3 SV=2	1	8	8	8	45.6	20.57	180	46.893	26004000000	1.05724	0.966493	0.991892	1.11926	1.23161	0.96057	0.301244	0.910668
E2R8C6;J9P5F1	E2R8C6;J9P5F1	tr|E2R8C6|E2R8C6_CANLF USO1 vesicle transport factor OS=Canis lupus familiaris GN=USO1 PE=4 SV=2;tr|J9P5F1|J9P5F1_CANLF USO1 vesicle transport factor OS=Canis lupus familiaris GN=USO1 PE=4 SV=1	2	21	21	21	27.1	107.81	963	85.184	3829000000	1.0188	1.14823	1.04282	0.998078	0.962053	1.06777	0.295406	1.06009
E2R8C7	E2R8C7	tr|E2R8C7|E2R8C7_CANLF Trafficking protein particle complex 12 OS=Canis lupus familiaris GN=TRAPPC12 PE=4 SV=2	1	2	2	2	3.4	86.768	793	5.2528	49087000	1.03857	1.23681	0	1.14795	1.0134	0	0.946026	1.05276
E2R8C9	E2R8C9	tr|E2R8C9|E2R8C9_CANLF Mannosyl-oligosaccharide glucosidase OS=Canis lupus familiaris GN=MOGS PE=4 SV=1	1	7	7	7	8.6	92.357	836	17.959	436220000	0.940346	0.946815	0.874367	0.976163	0.941824	0.912421	0.480991	0.975665
E2R8D8	E2R8D8	tr|E2R8D8|E2R8D8_CANLF OCIA domain containing 1 OS=Canis lupus familiaris GN=OCIAD1 PE=4 SV=1	1	7	7	7	35.6	27.812	247	30.389	1512400000	0.904366	1.11793	1.05448	1.05572	0.999472	1.04993	0.892777	0.990873
E2R8E1	E2R8E1	tr|E2R8E1|E2R8E1_CANLF SAFB like transcription modulator OS=Canis lupus familiaris GN=SLTM PE=4 SV=2	1	4	4	4	4.4	115.63	1017	10.226	213250000	0.844653	0	1.00759	0.903478	0	1.2215	0.859296	0.871655
E2R8E5	E2R8E5	tr|E2R8E5|E2R8E5_CANLF Serine and arginine rich splicing factor 5 OS=Canis lupus familiaris GN=SRSF5 PE=4 SV=1	1	6	5	5	22.4	31.263	272	22.621	2863600000	0.777549	0.882258	0.494704	1.10128	1.19682	0.779404	0.146895	0.700084
J9NS00;J9PBI6;J9P080;E2R8G3;J9P3J8;J9NYL5;J9NUD9;J9P9X7;J9P252;J9NTH4;J9PA41;F1PC48;J9P389;J9P5Y4;J9NZC0;J9NZ04;J9P618;J9P8F8;J9NZY0;J9PA67;J9JHT8;J9P8A1;J9P6A0;E2RNA5;J9P560;J9NSI9;J9PAK4;J9NXZ0	J9NS00;J9PBI6;J9P080;E2R8G3;J9P3J8;J9NYL5;J9NUD9;J9P9X7;J9P252;J9NTH4;J9PA41;F1PC48;J9P389;J9P5Y4;J9NZC0;J9NZ04;J9P618;J9P8F8;J9NZY0;J9PA67;J9JHT8	tr|J9NS00|J9NS00_CANLF Uncharacterized protein OS=Canis lupus familiaris PE=4 SV=1;tr|J9PBI6|J9PBI6_CANLF Uncharacterized protein OS=Canis lupus familiaris PE=4 SV=1;tr|J9P080|J9P080_CANLF Uncharacterized protein OS=Canis lupus familiaris PE=4 SV=1;tr|E2R8	28	4	4	4	28.2	14.241	124	8.4598	15119000000	1.0358	0.959983	1.0351	1.06184	1.07875	1.08501	0.0676587	0.939634
E2R8J5;E2R4M4	E2R8J5;E2R4M4	tr|E2R8J5|E2R8J5_CANLF Sad1 and UNC84 domain containing 1 OS=Canis lupus familiaris GN=SUN1 PE=4 SV=2;tr|E2R4M4|E2R4M4_CANLF Sad1 and UNC84 domain containing 1 OS=Canis lupus familiaris GN=SUN1 PE=4 SV=2	2	9	9	9	10.8	102.71	923	23.028	670720000	1.02902	0.989333	0.854131	0.974103	0.911803	1.19939	0.525585	0.931024
E2R8J6	E2R8J6	tr|E2R8J6|E2R8J6_CANLF Component of oligomeric golgi complex 6 OS=Canis lupus familiaris GN=COG6 PE=4 SV=2	1	2	2	2	2.5	75.984	685	2.0052	24880000	1.033	0.931974	0	1.01031	0.723295	0	0.87096	1.13346
E2R8K5;F1Q4G6	E2R8K5;F1Q4G6	tr|E2R8K5|E2R8K5_CANLF Protease, serine 22 OS=Canis lupus familiaris GN=PRSS22 PE=3 SV=1;tr|F1Q4G6|F1Q4G6_CANLF Protease, serine 22 OS=Canis lupus familiaris GN=PRSS22 PE=3 SV=2	2	2	2	2	6.8	33.044	307	4.4972	162510000	0.977818	0	1.10294	1.04015	0	1.13164	0.954814	0.958084
E2R8L3	E2R8L3	tr|E2R8L3|E2R8L3_CANLF Pre-mRNA processing factor 19 OS=Canis lupus familiaris GN=PRPF19 PE=4 SV=2	1	8	8	8	22.8	55.939	513	28.002	4261700000	0.892559	0.849362	0.92902	0.999276	0.79349	1.04204	0.532739	0.942195
E2R8M0	E2R8M0	tr|E2R8M0|E2R8M0_CANLF tRNA nucleotidyl transferase 1 OS=Canis lupus familiaris GN=TRNT1 PE=3 SV=2	1	4	4	4	7.8	50.059	436	9.4489	101000000	0.939656	0.967983	0.855587	1.02235	1.08364	1.02435	0.0357	0.882724
E2R8N6	E2R8N6	tr|E2R8N6|E2R8N6_CANLF Arginase OS=Canis lupus familiaris GN=ARG2 PE=3 SV=2	1	7	7	2	26.7	40.9	374	124.45	6021600000	0.849335	0.947841	0.956802	1.04607	1.00825	1.16437	0.0564995	0.855621
E2R8R8	E2R8R8	tr|E2R8R8|E2R8R8_CANLF Ribosomal protein S9 OS=Canis lupus familiaris GN=RPS9 PE=3 SV=1	1	14	14	14	56.2	22.591	194	31.03	29058000000	1.00298	0.92935	0.954918	1.08539	1.06358	1.12511	0.0101275	0.881849
E2R8S9	E2R8S9	tr|E2R8S9|E2R8S9_CANLF Protein arginine methyltransferase NDUFAF7 OS=Canis lupus familiaris GN=NDUFAF7 PE=3 SV=1	1	1	1	1	2	48.924	440	2.2127	50212000	0.990887	0.950871	0	1.09753	0.909286	0	0.965315	0.967581
E2R8U8	E2R8U8	tr|E2R8U8|E2R8U8_CANLF LSM6 homolog, U6 small nuclear RNA and mRNA degradation associated OS=Canis lupus familiaris GN=LSM6 PE=3 SV=1	1	3	3	3	33.8	9.1275	80	5.0646	684040000	1.03306	0.842483	0.949303	0.935234	1.00637	1.17536	0.340489	0.906282
F1PAD0;E2R8W5	F1PAD0;E2R8W5	tr|F1PAD0|F1PAD0_CANLF Eukaryotic translation initiation factor 2B subunit delta OS=Canis lupus familiaris GN=EIF2B4 PE=3 SV=2;tr|E2R8W5|E2R8W5_CANLF Eukaryotic translation initiation factor 2B subunit delta OS=Canis lupus familiaris GN=EIF2B4 PE=3 SV=2	2	7	7	7	15.8	57.762	525	17.639	316140000	0.9792	1.0028	1.04259	1.02848	1.2885	0.990976	0.378015	0.91434
E2R8Y3	E2R8Y3	tr|E2R8Y3|E2R8Y3_CANLF SEC22 homolog B, vesicle trafficking protein (gene/pseudogene) OS=Canis lupus familiaris GN=SEC22B PE=3 SV=2	1	10	10	10	44.1	27.753	247	60.294	4283000000	0.929223	1.02324	0.959415	0.978686	0.938624	1.08898	0.583303	0.968595
E2R8Z1	E2R8Z1	tr|E2R8Z1|E2R8Z1_CANLF Dipeptidyl peptidase 9 OS=Canis lupus familiaris GN=DPP9 PE=4 SV=1	1	7	7	7	7.6	101.79	891	13.026	403910000	1.0945	1.07802	0.908617	0.975202	1.04607	0.769784	0.396606	1.10393
E2R8Z5;F1PTS8	E2R8Z5;F1PTS8	tr|E2R8Z5|E2R8Z5_CANLF Keratin 5 OS=Canis lupus familiaris GN=KRT5 PE=3 SV=2;tr|F1PTS8|F1PTS8_CANLF Uncharacterized protein OS=Canis lupus familiaris GN=LOC486523 PE=3 SV=1	2	7	3	0	10.6	62.729	596	11.098	1798200000	1.48793	1.22792	0.755321	0.546135	1.00108	0.777175	0.203101	1.49337
E2R921	E2R921	tr|E2R921|E2R921_CANLF Enoyl-CoA hydratase 1 OS=Canis lupus familiaris GN=ECH1 PE=3 SV=2	1	6	6	6	15.9	38.48	352	13.144	1008600000	1.04993	1.01715	1.20967	0.920291	0.914445	1.0074	0.0953703	1.15292
E2R925;J9P0R7;Q6IG20	E2R925;J9P0R7;Q6IG20	tr|E2R925|E2R925_CANLF Reticulon OS=Canis lupus familiaris GN=RTN4 PE=4 SV=2;tr|J9P0R7|J9P0R7_CANLF Reticulon OS=Canis lupus familiaris GN=RTN4 PE=4 SV=1;tr|Q6IG20|Q6IG20_CANLF Reticulon (Fragment) OS=Canis lupus familiaris GN=RTN4 PE=2 SV=1	3	7	7	7	10.6	129.34	1186	72.072	13068000000	0.764582	0.956261	0.70852	0.975992	0.953527	0.857703	0.225465	0.871607
E2R954	E2R954	tr|E2R954|E2R954_CANLF DET1 and DDB1 associated 1 OS=Canis lupus familiaris GN=DDA1 PE=4 SV=2	1	2	2	2	15.8	11.69	101	3.7691	162590000	1.15786	1.14129	0.942958	0.955679	0.933092	0.8227	0.0924764	1.1957
E2R990	E2R990	tr|E2R990|E2R990_CANLF CCR4-NOT transcription complex subunit 1 OS=Canis lupus familiaris GN=CNOT1 PE=4 SV=2	1	10	10	10	5.3	267.37	2380	28.233	658280000	1.08718	0.983554	1.00439	1.12371	1.00379	1.0822	0.396656	0.95807
E2R9A2	E2R9A2	tr|E2R9A2|E2R9A2_CANLF Coatomer subunit beta OS=Canis lupus familiaris GN=COPB1 PE=4 SV=2	1	20	20	20	25.2	107.18	953	98.423	10716000000	1.05164	0.996945	0.989829	0.904106	0.890201	0.824608	0.0111433	1.16018
E2R9E3;J9NVR7	E2R9E3;J9NVR7	tr|E2R9E3|E2R9E3_CANLF Damage specific DNA binding protein 1 OS=Canis lupus familiaris GN=DDB1 PE=4 SV=1;tr|J9NVR7|J9NVR7_CANLF Damage specific DNA binding protein 1 OS=Canis lupus familiaris GN=DDB1 PE=4 SV=1	2	25	25	25	23.9	126.95	1140	109.82	10183000000	1.02064	1.03227	0.889138	1.05023	0.977625	1.00583	0.578141	0.969796
E2R9F5	E2R9F5	tr|E2R9F5|E2R9F5_CANLF Hydroxysteroid 17-beta dehydrogenase 10 OS=Canis lupus familiaris GN=HSD17B10 PE=3 SV=1	1	10	10	10	57.9	27.155	261	92.314	5652300000	0.971029	0.924203	1.06748	0.99681	1.09804	1.00715	0.430807	0.955098
E2R9G5	E2R9G5	tr|E2R9G5|E2R9G5_CANLF Guanine nucleotide-binding protein subunit gamma OS=Canis lupus familiaris GN=GNG10 PE=3 SV=1	1	1	1	1	22.1	7.2944	68	23.897	367750000	0	0.872993	0.934435	0	1.12448	1.11894	0.777372	0.805658
E2R9G7;E2QTG3	E2R9G7	tr|E2R9G7|E2R9G7_CANLF Uncharacterized protein OS=Canis lupus familiaris GN=RPL11 PE=3 SV=2	2	9	9	8	49.4	20.252	178	47.693	20140000000	0.959242	1.04474	0.971067	1.01607	1.05447	0.940548	0.793067	0.988031
J9P768;E2R9H9	J9P768;E2R9H9	tr|J9P768|J9P768_CANLF Cyclin dependent kinase 12 OS=Canis lupus familiaris GN=CDK12 PE=4 SV=1;tr|E2R9H9|E2R9H9_CANLF Cyclin dependent kinase 12 OS=Canis lupus familiaris GN=CDK12 PE=4 SV=1	2	1	1	1	1.3	154.4	1391	4.9417	36616000	1.05412	1.09455	1.05331	0.984851	0.499816	1.0476	0.267901	1.26448
E2R9I0;E2R9I1	E2R9I0;E2R9I1	tr|E2R9I0|E2R9I0_CANLF Polyadenylate-binding protein OS=Canis lupus familiaris GN=PABPC4 PE=3 SV=1;tr|E2R9I1|E2R9I1_CANLF Polyadenylate-binding protein OS=Canis lupus familiaris GN=PABPC4 PE=3 SV=2	2	19	13	13	31.1	69.464	631	37.563	5795400000	0.895365	0.858165	0.942168	1.06375	0.965818	1.08093	0.0331435	0.866644
F6XJI8;E2R9J7;J9P5D6	F6XJI8;E2R9J7;J9P5D6	tr|F6XJI8|F6XJI8_CANLF Mitochondrial ribosomal protein S31 OS=Canis lupus familiaris GN=MRPS31 PE=4 SV=1;tr|E2R9J7|E2R9J7_CANLF Mitochondrial ribosomal protein S31 OS=Canis lupus familiaris GN=MRPS31 PE=4 SV=2;tr|J9P5D6|J9P5D6_CANLF Mitochondrial ribosomal	3	6	6	6	14.7	38.868	341	24.972	1094300000	0.95856	0.941552	1.0051	1.04443	0.99745	1.02009	0.0887259	0.948803
E2R9J8	E2R9J8	tr|E2R9J8|E2R9J8_CANLF Protein arginine N-methyltransferase 5 OS=Canis lupus familiaris GN=PRMT5 PE=3 SV=1	1	9	9	9	16.8	72.657	637	24.188	2148800000	1.04959	0.909747	1.09722	1.05393	1.01309	0.96576	0.904027	1.00784
E2R9J9;J9JHE4	E2R9J9;J9JHE4	tr|E2R9J9|E2R9J9_CANLF Tripeptidyl peptidase 2 OS=Canis lupus familiaris GN=TPP2 PE=4 SV=2;tr|J9JHE4|J9JHE4_CANLF Tripeptidyl peptidase 2 OS=Canis lupus familiaris GN=TPP2 PE=4 SV=1	2	22	22	22	22.3	139.84	1262	89.483	1761300000	1.11522	1.0039	1.03363	1.06095	0.89992	0.94635	0.232948	1.08446
E2R9K4	E2R9K4	tr|E2R9K4|E2R9K4_CANLF Exportin 1 OS=Canis lupus familiaris GN=XPO1 PE=4 SV=2	1	15	15	15	16.3	123.14	1071	44.371	4385300000	1.07879	1.07354	1.02933	0.991648	0.994404	1.01223	0.0226809	1.06116
E2R9L7	E2R9L7	tr|E2R9L7|E2R9L7_CANLF Clustered mitochondria protein homolog OS=Canis lupus familiaris GN=CLUH PE=3 SV=2	1	13	13	13	10.2	150.82	1348	32.552	1091300000	1.16674	1.2272	1.03542	0.990484	0.979219	0.962279	0.0441798	1.16964
J9NUN6;E2R9Q7	J9NUN6;E2R9Q7	tr|J9NUN6|J9NUN6_CANLF Chromatin target of PRMT1 OS=Canis lupus familiaris GN=CHTOP PE=4 SV=1;tr|E2R9Q7|E2R9Q7_CANLF Chromatin target of PRMT1 OS=Canis lupus familiaris GN=CHTOP PE=4 SV=2	2	4	4	4	24.6	22.136	203	7.9391	183570000	0	0.961291	0.721767	0	1.0827	0.705573	0.93879	0.941165
E2R9Q9	E2R9Q9	tr|E2R9Q9|E2R9Q9_CANLF SPC24, NDC80 kinetochore complex component OS=Canis lupus familiaris GN=SPC24 PE=4 SV=2	1	2	2	2	16.2	22.494	197	5.1548	55493000	1.30058	0	1.30561	1.0056	0	1.27793	0.862571	1.1413
E2R9R1	E2R9R1	tr|E2R9R1|E2R9R1_CANLF Ras suppressor protein 1 OS=Canis lupus familiaris GN=RSU1 PE=4 SV=1	1	3	3	3	12.3	31.525	277	8.701	290140000	1.03066	0.906476	1.01034	1.24531	0.985664	1.19111	0.146388	0.861309
E2R9R6	E2R9R6	tr|E2R9R6|E2R9R6_CANLF Programmed cell death 10 OS=Canis lupus familiaris GN=PDCD10 PE=4 SV=2	1	2	2	2	12.2	20.955	181	5.6739	198610000	1.12673	1.35691	1.0835	1.10903	0.805812	1.02877	0.169569	1.21182
E2R9T6	E2R9T6	tr|E2R9T6|E2R9T6_CANLF Interleukin enhancer binding factor 2 OS=Canis lupus familiaris GN=ILF2 PE=4 SV=2	1	14	14	14	49.2	43.028	390	122.79	7219200000	0.91346	0.956534	0.916961	1.02395	1.05561	1.09957	0.00725678	0.876641
E2R9T9	E2R9T9	tr|E2R9T9|E2R9T9_CANLF DNA methyltransferase 1 associated protein 1 OS=Canis lupus familiaris GN=DMAP1 PE=4 SV=1	1	2	2	2	3.8	53.103	468	3.7672	86942000	0.849879	1.13935	0.957498	0.902961	0.98767	1.08142	0.936135	0.991482
E2R9U7;F1PC81	E2R9U7	tr|E2R9U7|E2R9U7_CANLF UBX domain-containing protein 7 OS=Canis lupus familiaris GN=UBXN7 PE=4 SV=1	2	3	3	3	8.6	54.878	489	7.3624	132880000	1.08077	1.1508	1.10845	1.11855	0.888968	1.04736	0.250772	1.09334
E2R9U8	E2R9U8	tr|E2R9U8|E2R9U8_CANLF Eukaryotic translation elongation factor 1 delta OS=Canis lupus familiaris GN=EEF1D PE=3 SV=2	1	13	13	12	26	69.642	635	179.86	32416000000	0.988491	0.959643	1.00866	1.10016	1.13479	1.22563	0.0137426	0.854418
E2R9V5	E2R9V5	tr|E2R9V5|E2R9V5_CANLF MICOS complex subunit OS=Canis lupus familiaris GN=CHCHD3 PE=3 SV=1	1	6	6	6	28.2	26.154	227	19.252	3257600000	0.951912	0.961145	0.974096	0.96986	0.892827	1.05654	0.83372	0.989013
E2R9X3;E2R9X4	E2R9X3;E2R9X4	tr|E2R9X3|E2R9X3_CANLF Succinate dehydrogenase complex subunit C OS=Canis lupus familiaris GN=SDHC PE=4 SV=2;tr|E2R9X4|E2R9X4_CANLF Succinate dehydrogenase complex subunit C (Fragment) OS=Canis lupus familiaris GN=SDHC PE=4 SV=1	2	2	2	2	15.6	14.702	135	12.584	688500000	1.05302	0.968051	1.07213	1.06137	0.862049	0.906055	0.268058	1.09321
E2R9Y9;J9P6M3;J9P0A3;E2RBU7	E2R9Y9;J9P6M3	tr|E2R9Y9|E2R9Y9_CANLF Uncharacterized protein OS=Canis lupus familiaris GN=RPLP2 PE=3 SV=1;tr|J9P6M3|J9P6M3_CANLF Uncharacterized protein OS=Canis lupus familiaris PE=3 SV=1	4	4	4	4	60.9	11.706	115	74.394	43470000000	0.976519	0.99608	1.10761	1.20639	1.10226	1.1956	0.0546209	0.87899
E2R9Z3	E2R9Z3	tr|E2R9Z3|E2R9Z3_CANLF 3-hydroxy-3-methylglutaryl coenzyme A reductase OS=Canis lupus familiaris GN=HMGCR PE=3 SV=2	1	5	5	5	6.4	99.067	904	10.613	120260000	0.964746	0.911956	0	1.17649	1.14541	0	0.780505	0.808262
E2RA46;E2RA07;J9P7G2;J9P1K6;E2RS29;E2R9Z1	E2RA46;E2RA07;J9P7G2;J9P1K6	tr|E2RA46|E2RA46_CANLF Uncharacterized protein OS=Canis lupus familiaris GN=EWSR1 PE=4 SV=2;tr|E2RA07|E2RA07_CANLF Uncharacterized protein OS=Canis lupus familiaris GN=EWSR1 PE=4 SV=2;tr|J9P7G2|J9P7G2_CANLF Uncharacterized protein OS=Canis lupus familiaris	6	6	6	6	14.2	65.082	619	29.433	4013800000	0.950412	0.951709	0.977738	1.0156	1.09461	1.24756	0.0811331	0.857669
E2RA47	E2RA47	tr|E2RA47|E2RA47_CANLF NLR family member X1 OS=Canis lupus familiaris GN=NLRX1 PE=4 SV=1	1	4	4	4	3.8	107.09	975	5.9467	274670000	0.903908	0	1.12526	1.06002	0	0.914	0.971164	1.02794
E2RAC8	E2RAC8	tr|E2RAC8|E2RAC8_CANLF Testis expressed 264 OS=Canis lupus familiaris GN=TEX264 PE=4 SV=2	1	8	8	8	28.1	33.92	313	19.868	856790000	1.00605	1.00941	1.03738	1.02634	1.0829	0.939038	0.97353	1.00149
E2RAC9	E2RAC9	tr|E2RAC9|E2RAC9_CANLF Exocyst complex component 5 OS=Canis lupus familiaris GN=EXOC5 PE=4 SV=2	1	2	2	2	3.1	81.825	708	3.9792	32425000	1.22306	0	1.03517	1.12969	0	1.10325	0.988115	1.01133
E2RAD3	E2RAD3	tr|E2RAD3|E2RAD3_CANLF Uncharacterized protein OS=Canis lupus familiaris GN=MRPS17 PE=4 SV=2	1	4	4	4	25.4	15.906	142	6.3265	372510000	0.977857	0.972247	1.0183	0.83713	0.884656	0.962098	0.0728167	1.10601
E2RAE2	E2RAE2	tr|E2RAE2|E2RAE2_CANLF Electron transfer flavoprotein alpha subunit OS=Canis lupus familiaris GN=ETFA PE=4 SV=2	1	14	14	14	52.6	34.997	333	96.747	14328000000	0.92132	0.914887	0.98841	0.995053	0.966478	0.964415	0.255979	0.965369
E2RAE6	E2RAE6	tr|E2RAE6|E2RAE6_CANLF Sorting nexin OS=Canis lupus familiaris GN=SNX5 PE=3 SV=1	1	5	4	4	13.1	46.777	404	31.406	194590000	1.1857	0	1.32219	0.873625	0	0.932016	0.674085	1.38892
F1P668;E2RAF6	F1P668;E2RAF6	tr|F1P668|F1P668_CANLF Acyl-coenzyme A oxidase OS=Canis lupus familiaris GN=ACOX1 PE=3 SV=2;tr|E2RAF6|E2RAF6_CANLF Acyl-coenzyme A oxidase OS=Canis lupus familiaris GN=ACOX1 PE=3 SV=1	2	11	11	11	22.7	75.034	661	50.084	1161300000	1.0247	0.860502	1.0579	1.03419	0.976145	1.10844	0.461897	0.943671
E2RAG6	E2RAG6	tr|E2RAG6|E2RAG6_CANLF BCL2 associated athanogene 5 OS=Canis lupus familiaris GN=BAG5 PE=4 SV=2	1	5	5	5	13.8	51.975	457	19.363	733310000	0.95731	1.00233	0.991271	1.02698	0.96965	1.1662	0.303693	0.932997
E2RAI1	E2RAI1	tr|E2RAI1|E2RAI1_CANLF CDK5 regulatory subunit-associated protein 1-like 1 OS=Canis lupus familiaris GN=CDKAL1 PE=2 SV=2	1	2	2	2	4.2	65.082	578	4.0294	21480000	0.965684	0	0.69225	0.722907	0	0.858362	0.951134	1.04848
E2RAI8	E2RAI8	tr|E2RAI8|E2RAI8_CANLF Oxidative stress responsive 1 OS=Canis lupus familiaris GN=OXSR1 PE=4 SV=2	1	10	10	10	22.6	58.002	527	33.181	2368700000	1.15149	1.01517	1.22124	0.970871	1.07242	0.959155	0.141997	1.12838
E2RAJ7	E2RAJ7	tr|E2RAJ7|E2RAJ7_CANLF Transmembrane protein 45B OS=Canis lupus familiaris GN=TMEM45B PE=4 SV=1	1	1	1	1	3.6	31.735	275	3.1538	61570000	0.975012	0	0.731375	1.09	0	0.98345	0.800911	0.822969
J9P6K6;E2RAR6;J9P7L8	J9P6K6;E2RAR6;J9P7L8	tr|J9P6K6|J9P6K6_CANLF Kelch repeat and BTB domain containing 6 OS=Canis lupus familiaris GN=KBTBD6 PE=4 SV=1;tr|E2RAR6|E2RAR6_CANLF Kelch repeat and BTB domain containing 6 OS=Canis lupus familiaris GN=KBTBD6 PE=4 SV=2;tr|J9P7L8|J9P7L8_CANLF Kelch repeat	3	2	2	2	2.8	69.024	609	2.997	84092000	1.07896	0	1.00851	0.950426	0	1.16896	0.984049	0.98494
J9NXJ1;E2RAT4	J9NXJ1;E2RAT4	tr|J9NXJ1|J9NXJ1_CANLF Nudix hydrolase 5 OS=Canis lupus familiaris GN=NUDT5 PE=3 SV=1;tr|E2RAT4|E2RAT4_CANLF Nudix hydrolase 5 OS=Canis lupus familiaris GN=NUDT5 PE=3 SV=1	2	3	3	3	14.6	24.402	219	7.1876	440760000	1.12465	1.29557	0.928196	1.24049	1.10359	0.851933	0.760424	1.04769
E2RAT5	E2RAT5	tr|E2RAT5|E2RAT5_CANLF Pre-mRNA processing factor 4B OS=Canis lupus familiaris GN=PRPF4B PE=4 SV=2	1	8	8	8	7.4	120.82	1042	17.759	745670000	0.790253	1.13146	0.94209	1.011	1.14196	1.13035	0.262092	0.87223
E2RAT6	E2RAT6	tr|E2RAT6|E2RAT6_CANLF Coatomer subunit epsilon OS=Canis lupus familiaris GN=COPE PE=3 SV=1	1	6	6	6	30.5	34.529	308	28.688	831090000	1.14459	1.16452	1.03644	0.966022	0.972633	0.901268	0.0212704	1.17804
E2RAT8	E2RAT8	tr|E2RAT8|E2RAT8_CANLF VPS18, CORVET/HOPS core subunit OS=Canis lupus familiaris GN=VPS18 PE=4 SV=1	1	4	4	4	4.2	110.15	973	11.369	35708000	1.18159	1.2846	0.938288	1.13549	1.00216	1.16279	0.776186	1.03153
E2RAU5	E2RAU5	tr|E2RAU5|E2RAU5_CANLF Stress-70 protein, mitochondrial OS=Canis lupus familiaris GN=HSPA9 PE=3 SV=1	1	32	32	32	54.6	73.664	679	323.31	65991000000	0.889465	0.926707	0.90127	1.02159	1.04402	0.970108	0.0123178	0.895157
E2RAV2;J9P266	E2RAV2;J9P266	tr|E2RAV2|E2RAV2_CANLF Carbamoyl-phosphate synthetase 2, aspartate transcarbamylase, and dihydroorotase OS=Canis lupus familiaris GN=CAD PE=3 SV=2;tr|J9P266|J9P266_CANLF Carbamoyl-phosphate synthetase 2, aspartate transcarbamylase, and dihydroorotase OS=Ca	2	37	37	34	22.2	243.55	2228	159.66	5689600000	1.18227	1.13281	0.997489	1.03244	0.98621	0.973831	0.139851	1.10697
F1PD15;J9P8J2;E2RAW0	F1PD15;J9P8J2;E2RAW0	tr|F1PD15|F1PD15_CANLF Mitochondrial calcium uniporter OS=Canis lupus familiaris GN=MCU PE=4 SV=1;tr|J9P8J2|J9P8J2_CANLF Mitochondrial calcium uniporter OS=Canis lupus familiaris GN=MCU PE=4 SV=1;tr|E2RAW0|E2RAW0_CANLF Mitochondrial calcium uniporter OS=Ca	3	7	7	7	21.6	35.529	301	37.951	1080700000	0.921865	0.952493	1.00099	1.0624	1.02654	1.20731	0.0790735	0.872311
E2RAW7	E2RAW7	tr|E2RAW7|E2RAW7_CANLF Protein phosphatase 1 regulatory inhibitor subunit 11 OS=Canis lupus familiaris GN=PPP1R11 PE=4 SV=1	1	1	1	1	11.9	13.91	126	2.3147	72195000	0.941741	1.21694	1.07369	0.931519	0.732925	1.21064	0.497338	1.12427
E2RAX2	E2RAX2	tr|E2RAX2|E2RAX2_CANLF Pseudouridylate synthase 7 (putative) OS=Canis lupus familiaris GN=PUS7 PE=4 SV=2	1	2	2	2	2.7	86.541	764	4.2008	80239000	0.96218	0.933037	0	0.800253	0.732189	0	0.781052	1.23673
J9P251;E2RAZ2	J9P251;E2RAZ2	tr|J9P251|J9P251_CANLF RAD50 interactor 1 OS=Canis lupus familiaris GN=RINT1 PE=4 SV=1;tr|E2RAZ2|E2RAZ2_CANLF RAD50 interactor 1 OS=Canis lupus familiaris GN=RINT1 PE=4 SV=2	2	2	2	2	2.7	82.188	712	2.9202	45409000	0.904931	0	1.03088	0.969079	0	1.19995	0.881741	0.89248
E2RAZ6	E2RAZ6	tr|E2RAZ6|E2RAZ6_CANLF GrpE protein homolog OS=Canis lupus familiaris GN=GRPEL1 PE=3 SV=2	1	7	7	7	33.9	25.547	230	19.642	2439200000	0.93052	1.01036	1.22053	0.959528	0.973079	0.982558	0.397631	1.08447
E2RAZ8;J9P5F5	E2RAZ8	tr|E2RAZ8|E2RAZ8_CANLF Glycerol-3-phosphate dehydrogenase OS=Canis lupus familiaris GN=GPD2 PE=3 SV=2	2	17	17	17	31.9	80.22	722	141.58	5851200000	0.897466	0.887005	0.895947	0.956584	1.07465	1.00578	0.0259177	0.882582
E2RB07;E2RB11	E2RB07;E2RB11	tr|E2RB07|E2RB07_CANLF Caspase 10 OS=Canis lupus familiaris GN=CASP10 PE=3 SV=2;tr|E2RB11|E2RB11_CANLF Caspase 10 OS=Canis lupus familiaris GN=CASP10 PE=3 SV=2	2	4	4	4	9.6	54.608	480	8.5962	338890000	1.27095	1.01281	1.00285	1.05382	1.03171	0.883529	0.361169	1.10695
E2RB15	E2RB15	tr|E2RB15|E2RB15_CANLF ECSIT signalling integrator OS=Canis lupus familiaris GN=ECSIT PE=4 SV=1	1	4	4	4	16.6	48.88	433	17.325	199670000	1.07623	0.914191	1.01394	0.918207	1.08074	1.04322	0.862232	0.987572
E2RB18	E2RB18	tr|E2RB18|E2RB18_CANLF Cms1 ribosomal small subunit homolog (yeast) OS=Canis lupus familiaris GN=CMSS1 PE=4 SV=2	1	1	1	1	4	31.731	276	2.9905	85758000	0.852706	0.860306	0.86195	0.995739	0.862293	1.09689	0.135979	0.871416
E2RB31	E2RB31	tr|E2RB31|E2RB31_CANLF Hypoxia up-regulated 1 OS=Canis lupus familiaris GN=HYOU1 PE=3 SV=2	1	32	32	32	41.2	111.43	996	195.06	14982000000	1.01518	1.02583	1.09576	0.952616	0.940277	0.973375	0.0290288	1.09437
E2RB34	E2RB34	tr|E2RB34|E2RB34_CANLF Nucleoporin 133 OS=Canis lupus familiaris GN=NUP133 PE=4 SV=2	1	12	12	12	11.4	129.21	1156	27.689	6310400000	0.89894	0.864011	0.890994	1.03001	1.0042	0.957694	0.00888578	0.887044
E2RB37;J9P4G9;J9NWR4	E2RB37	tr|E2RB37|E2RB37_CANLF Uncharacterized protein OS=Canis lupus familiaris GN=PDIA6 PE=3 SV=1	3	13	13	13	33.9	48.298	440	252.43	48556000000	0.926422	0.934401	1.04421	1.02779	0.890527	1.03345	0.808665	0.984167
E2RB38	E2RB38	tr|E2RB38|E2RB38_CANLF Tropomyosin 3 OS=Canis lupus familiaris GN=TPM3 PE=3 SV=2	1	17	17	8	53.6	28.87	248	102.78	59739000000	1.00131	1.12387	1.05682	1.25948	1.17014	0.942956	0.562244	0.943492
E2RB43	E2RB43	tr|E2RB43|E2RB43_CANLF RNA polymerase II associated protein 3 OS=Canis lupus familiaris GN=RPAP3 PE=4 SV=1	1	4	4	4	8	75.575	663	9.3984	98565000	1.0259	0	1.098	1.03266	0	1.04099	0.974633	1.02424
J9P4L6;E2RB54	J9P4L6;E2RB54	tr|J9P4L6|J9P4L6_CANLF Uncharacterized protein OS=Canis lupus familiaris GN=DDX52 PE=4 SV=1;tr|E2RB54|E2RB54_CANLF Uncharacterized protein OS=Canis lupus familiaris PE=4 SV=2	2	2	2	2	3.3	67.847	598	3.8574	239450000	0.838648	0	0.921158	1.04524	0	1.10241	0.794201	0.81941
J9NW77;E2RB62	J9NW77;E2RB62	tr|J9NW77|J9NW77_CANLF Myosin IB OS=Canis lupus familiaris GN=MYO1B PE=3 SV=1;tr|E2RB62|E2RB62_CANLF Myosin IB OS=Canis lupus familiaris GN=MYO1B PE=3 SV=2	2	10	10	10	10.6	128.43	1107	27.867	421020000	1.08058	1.05859	0.936918	0.944034	0.89313	0.933447	0.0976288	1.11026
E2RB79	E2RB79	tr|E2RB79|E2RB79_CANLF T-complex protein 1 subunit gamma OS=Canis lupus familiaris GN=CCT3 PE=3 SV=2	1	29	29	4	58.5	61.242	549	188.05	53212000000	1.09787	1.05679	1.14217	1.04825	1.04155	1.02046	0.0752744	1.05999
E2RB81;J9PAI4	E2RB81;J9PAI4	tr|E2RB81|E2RB81_CANLF Chaperonin containing TCP1 subunit 5 OS=Canis lupus familiaris GN=CCT5 PE=3 SV=2;tr|J9PAI4|J9PAI4_CANLF Chaperonin containing TCP1 subunit 5 OS=Canis lupus familiaris GN=CCT5 PE=3 SV=1	2	31	31	31	58	59.513	540	210.73	26499000000	1.12012	1.10996	1.10994	1.05257	1.0711	1.08092	0.00733579	1.04226
E2RB82;K7S4C5	E2RB82	tr|E2RB82|E2RB82_CANLF Signal transducer and activator of transcription OS=Canis lupus familiaris GN=STAT3 PE=3 SV=2	2	3	3	3	4	88.057	770	5.4043	107500000	1.20494	1.29681	0.962216	0.891294	0.825188	0.923921	0.057522	1.31191
E2RB92	E2RB92	tr|E2RB92|E2RB92_CANLF Mitochondrial ribosomal protein S5 OS=Canis lupus familiaris GN=MRPS5 PE=3 SV=2	1	10	10	10	26.5	48.426	430	36.058	1054500000	1.04838	0.964342	1.03821	1.03633	0.993255	1.06035	0.713414	0.987378
E2RB97;E2RB96	E2RB97;E2RB96	tr|E2RB97|E2RB97_CANLF Histocompatibility minor 13 OS=Canis lupus familiaris GN=HM13 PE=4 SV=1;tr|E2RB96|E2RB96_CANLF Histocompatibility minor 13 OS=Canis lupus familiaris GN=HM13 PE=4 SV=2	2	6	6	6	17.2	41.475	378	16.017	1491200000	0.750576	0.807581	0.506039	0.993663	1.30118	0.409003	0.485165	0.763429
E2RBA4	E2RBA4	tr|E2RBA4|E2RBA4_CANLF NIN1/PSMD8 binding protein 1 homolog OS=Canis lupus familiaris GN=NOB1 PE=4 SV=1	1	5	5	5	11.1	46.48	414	9.688	326930000	1.36333	1.06814	0.91694	0.793015	1.19721	0.835905	0.396088	1.18481
E2RBA8	E2RBA8	tr|E2RBA8|E2RBA8_CANLF PDZ and LIM domain 5 OS=Canis lupus familiaris GN=PDLIM5 PE=4 SV=1	1	10	10	10	23.7	64.058	596	46.639	752690000	1.17862	1.60721	1.08193	0.98903	0.621915	0.781062	0.0636196	1.61695
E2RBB4	E2RBB4	tr|E2RBB4|E2RBB4_CANLF RNA cytidine acetyltransferase OS=Canis lupus familiaris GN=NAT10 PE=3 SV=1	1	18	18	18	18.8	115.74	1025	68.847	2097000000	0.888021	0.859869	0.748318	0.994038	0.935692	0.929533	0.0629148	0.873025
E2RBB8;F1PSI2	E2RBB8	tr|E2RBB8|E2RBB8_CANLF Tyrosine-protein kinase OS=Canis lupus familiaris GN=LYN PE=3 SV=2	2	5	5	5	10.2	58.775	512	10.795	376780000	0.942155	1.0927	1.01768	0.989395	0.857601	1.1353	0.810077	1.02355
E2RBC1	E2RBC1	tr|E2RBC1|E2RBC1_CANLF Dynactin subunit 3 OS=Canis lupus familiaris GN=DCTN3 PE=4 SV=1	1	4	4	4	19.4	21.147	186	5.9647	98839000	0	1.09778	1.09545	0	1.00197	1.0815	0.945692	1.05268
E2RBC3;F6X9E9;F1P7S1;J9P0P6	E2RBC3	tr|E2RBC3|E2RBC3_CANLF Tubulin alpha chain OS=Canis lupus familiaris GN=TUBA4A PE=3 SV=1	4	20	3	3	57.1	49.924	448	25.855	3714100000	1.14683	1.24858	1.24026	1.12907	1.02402	1.04035	0.0330692	1.13848
E2RBC7	E2RBC7	tr|E2RBC7|E2RBC7_CANLF Synaptosome associated protein 29 OS=Canis lupus familiaris GN=SNAP29 PE=4 SV=2	1	6	6	6	32.6	28.825	258	20.101	415090000	1.12283	1.154	1.00816	1.18212	0.966963	0.94395	0.506774	1.06206
E2RBD1	E2RBD1	tr|E2RBD1|E2RBD1_CANLF Nucleolar and coiled-body phosphoprotein 1 OS=Canis lupus familiaris GN=NOLC1 PE=4 SV=2	1	13	13	13	16.5	74.883	705	23.048	3714700000	1.0726	1.18508	1.00867	1.0463	0.993586	0.906256	0.179968	1.10869
E2RBD5;E2RIG5	E2RBD5;E2RIG5	tr|E2RBD5|E2RBD5_CANLF Mitochondrial ribosomal protein S18A OS=Canis lupus familiaris GN=MRPS18A PE=4 SV=1;tr|E2RIG5|E2RIG5_CANLF Mitochondrial ribosomal protein S18A OS=Canis lupus familiaris GN=MRPS18A PE=4 SV=2	2	2	2	2	8.2	22.621	196	2.164	57177000	0.90993	1.05198	0.44944	0.91973	1.05851	0.344309	0.922106	1.03824
E2RBD6	E2RBD6	tr|E2RBD6|E2RBD6_CANLF Extra spindle pole bodies like 1, separase OS=Canis lupus familiaris GN=ESPL1 PE=4 SV=1	1	1	1	1	0.5	231.6	2108	2.6171	18205000	1.55757	1.23617	0.957183	1.27023	1.23208	1.00863	0.697864	1.06836
E2RBF4	E2RBF4	tr|E2RBF4|E2RBF4_CANLF THUMP domain containing 1 OS=Canis lupus familiaris GN=THUMPD1 PE=4 SV=2	1	7	7	7	19.3	40.084	358	14.263	817670000	0.998381	0.920995	1.04092	0.919642	0.964596	1.08336	0.96968	0.997541
E2RBG1	E2RBG1	tr|E2RBG1|E2RBG1_CANLF Phosphoribosyl pyrophosphate synthetase 1 OS=Canis lupus familiaris GN=PRPS1 PE=3 SV=1	1	8	8	5	28.9	34.834	318	29.641	991920000	1.00479	1.11302	1.24787	1.07709	0.991365	0.943709	0.216673	1.11736
E2RBH1	E2RBH1	tr|E2RBH1|E2RBH1_CANLF Prolactin regulatory element binding OS=Canis lupus familiaris GN=PREB PE=4 SV=1	1	6	6	6	19.9	45.968	418	30.968	843040000	0.87919	0.930996	0.997156	0.868998	0.944526	1.15878	0.587148	0.944499
E2RBH4	E2RBH4	tr|E2RBH4|E2RBH4_CANLF Coiled-coil domain containing 47 OS=Canis lupus familiaris GN=CCDC47 PE=4 SV=1	1	5	5	5	10.3	55.988	485	11.553	281830000	1.23788	0.941382	0.956697	1.08058	0.988783	1.09298	0.935309	0.991655
E2RBI2	E2RBI2	tr|E2RBI2|E2RBI2_CANLF Solute carrier family 25 member 12 OS=Canis lupus familiaris GN=SLC25A12 PE=3 SV=1	1	8	6	6	13.4	74.798	678	17.864	768750000	0.943591	0.988473	1.14852	0.988272	0.963633	0.98821	0.496907	1.04778
E2RBJ1	E2RBJ1	tr|E2RBJ1|E2RBJ1_CANLF Eukaryotic translation initiation factor 2B subunit gamma OS=Canis lupus familiaris GN=EIF2B3 PE=4 SV=2	1	4	4	4	11.9	50.402	452	9.4935	155220000	0.945184	0.968906	0.366724	0.979837	1.07942	0.460884	0.786036	0.905033
J9NWF8;E2RBL2	J9NWF8;E2RBL2	tr|J9NWF8|J9NWF8_CANLF Secretory carrier-associated membrane protein OS=Canis lupus familiaris GN=SCAMP2 PE=3 SV=1;tr|E2RBL2|E2RBL2_CANLF Secretory carrier-associated membrane protein OS=Canis lupus familiaris GN=SCAMP2 PE=3 SV=2	2	1	1	1	3.6	36.847	329	3.1488	542110000	0.915911	0.944632	0.743657	1.08589	0.97559	0.898315	0.226772	0.87986
F1PL72;F1P6C3;J9PBA2;E2RBL5;E2RS84	F1PL72;F1P6C3;J9PBA2;E2RBL5;E2RS84	tr|F1PL72|F1PL72_CANLF Dystrobrevin beta OS=Canis lupus familiaris GN=DTNB PE=4 SV=2;tr|F1P6C3|F1P6C3_CANLF Dystrobrevin alpha OS=Canis lupus familiaris GN=DTNA PE=4 SV=2;tr|J9PBA2|J9PBA2_CANLF Dystrobrevin OS=Canis lupus familiaris GN=DTNB PE=3 SV=1;tr|E2	5	1	1	1	2.2	45.617	408	2.0925	16510000	1.13497	0	0.952485	0.894235	0	0.813849	0.794054	1.22211
E2RBL9	E2RBL9	tr|E2RBL9|E2RBL9_CANLF Integrin beta OS=Canis lupus familiaris GN=ITGB6 PE=3 SV=2	1	3	3	3	4.6	88.344	808	8.1998	648920000	1.00564	0.79398	0.994514	1.07422	1.20021	1.08469	0.0775212	0.831805
E2RBM2;E2RFH6;E2RFX3	E2RBM2;E2RFH6;E2RFX3	tr|E2RBM2|E2RBM2_CANLF Phosphate cytidylyltransferase 1, choline, alpha OS=Canis lupus familiaris GN=PCYT1A PE=4 SV=2;tr|E2RFH6|E2RFH6_CANLF Phosphate cytidylyltransferase 1, choline, beta OS=Canis lupus familiaris GN=PCYT1B PE=4 SV=2;tr|E2RFX3|E2RFX3_CANL	3	4	4	4	10.9	41.782	367	8.3937	177090000	0.923832	1.23856	1.03197	1.10862	0.978076	1.17249	0.852006	0.98011
E2RBM3;J9NWT8	E2RBM3;J9NWT8	tr|E2RBM3|E2RBM3_CANLF Uncharacterized protein OS=Canis lupus familiaris GN=ETF1 PE=4 SV=1;tr|J9NWT8|J9NWT8_CANLF Uncharacterized protein OS=Canis lupus familiaris GN=ETF1 PE=4 SV=1	2	8	8	8	19.9	49.03	437	42.716	1687900000	1.15913	1.06129	1.1094	1.05137	1.15524	1.0782	0.739204	1.0137
E2RBR6	E2RBR6	tr|E2RBR6|E2RBR6_CANLF Proteasome subunit beta OS=Canis lupus familiaris GN=PSMB4 PE=3 SV=1	1	4	4	4	24.6	29.164	264	28.476	1455900000	1.16848	1.03784	1.08832	0.852939	1.07303	0.983268	0.159117	1.13247
E2RBU1	E2RBU1	tr|E2RBU1|E2RBU1_CANLF Serine/threonine kinase receptor associated protein OS=Canis lupus familiaris GN=STRAP PE=4 SV=2	1	14	14	14	52.6	38.532	350	88.78	6810200000	1.10812	0.990681	1.0294	1.02481	0.966875	1.0115	0.342634	1.04163
E2RBU9	E2RBU9	tr|E2RBU9|E2RBU9_CANLF Uncharacterized protein OS=Canis lupus familiaris PE=3 SV=2	1	12	12	6	8.8	189.58	1677	35.352	2877500000	0.955956	0.910545	0.930557	0.992009	1.05341	1.00398	0.0214262	0.917248
E2RBW9	E2RBW9	tr|E2RBW9|E2RBW9_CANLF UTP18, small subunit processome component OS=Canis lupus familiaris GN=UTP18 PE=4 SV=2	1	7	7	7	13.3	61.865	555	16.781	871580000	0.857498	0.897719	0.815584	0.869894	0.92929	0.998628	0.161428	0.918861
E2RC02	E2RC02	tr|E2RC02|E2RC02_CANLF GDP-mannose 4,6-dehydratase OS=Canis lupus familiaris GN=GMDS PE=4 SV=2	1	4	4	4	12	34.112	300	7.6849	357920000	0.811593	1.0124	0.998466	0.967915	0.920273	0.886072	0.827205	1.01737
E2RC10	E2RC10	tr|E2RC10|E2RC10_CANLF Synaptophysin like 1 OS=Canis lupus familiaris GN=SYPL1 PE=4 SV=2	1	3	3	3	24	24.518	225	21.056	2477500000	0.909488	0.861317	1.06034	1.11358	1.032	1.13738	0.0908414	0.862375
E2RC35	E2RC35	tr|E2RC35|E2RC35_CANLF RNA helicase OS=Canis lupus familiaris GN=DDX10 PE=3 SV=2	1	7	7	7	8.5	100.18	871	11.155	235880000	0.936328	1.34426	0	0.956154	0.993753	0	0.840651	1.16959
E2RC52	E2RC52	tr|E2RC52|E2RC52_CANLF Spermatid perinuclear RNA binding protein OS=Canis lupus familiaris GN=STRBP PE=4 SV=2	1	6	3	3	8.9	73.588	672	6.7886	87087000	0.642034	0.972732	0.858585	0.84639	1.83669	1.19974	0.198961	0.636998
E2RC78;E2RFI6	E2RC78;E2RFI6	tr|E2RC78|E2RC78_CANLF Translocase of inner mitochondrial membrane 50 OS=Canis lupus familiaris GN=TIMM50 PE=4 SV=1;tr|E2RFI6|E2RFI6_CANLF Translocase of inner mitochondrial membrane 50 OS=Canis lupus familiaris GN=TIMM50 PE=4 SV=2	2	5	5	5	16.9	40.248	356	45.546	2786700000	0.833625	0.927549	0.667006	1.0093	1.14973	0.69752	0.405795	0.850038
E2RC89	E2RC89	tr|E2RC89|E2RC89_CANLF Glyceraldehyde-3-phosphate dehydrogenase OS=Canis lupus familiaris GN=GAPDHS PE=3 SV=1	1	2	1	1	5.2	44.093	404	2.799	147660000	0	1.20433	1.39713	0	0.962613	1.00706	0.719746	1.32076
E2RCD6;J9NZZ4	E2RCD6;J9NZZ4	tr|E2RCD6|E2RCD6_CANLF tRNA-splicing ligase RtcB homolog OS=Canis lupus familiaris GN=RTCB PE=3 SV=1;tr|J9NZZ4|J9NZZ4_CANLF tRNA-splicing ligase RtcB homolog OS=Canis lupus familiaris GN=RTCB PE=3 SV=1	2	16	16	16	36.4	55.183	505	83.299	6822900000	1.05043	1.06967	1.06103	1.05565	0.948853	1.02607	0.195417	1.04968
E2RCD8	E2RCD8	tr|E2RCD8|E2RCD8_CANLF Wolframin ER transmembrane glycoprotein OS=Canis lupus familiaris GN=WFS1 PE=4 SV=1	1	2	2	2	2.3	98.602	883	3.5907	78536000	1.11157	0	0.920404	0.967869	0	1.03217	0.983324	1.01597
J9P4U1;E2RCE7	J9P4U1;E2RCE7	tr|J9P4U1|J9P4U1_CANLF Striatin 3 OS=Canis lupus familiaris GN=STRN3 PE=4 SV=1;tr|E2RCE7|E2RCE7_CANLF Striatin 3 OS=Canis lupus familiaris GN=STRN3 PE=4 SV=2	2	3	3	3	4.9	77.883	713	7.1246	259320000	0.96852	1.00341	1.04092	1.10806	1.02301	1.17783	0.116441	0.910526
E2RCF4;J9NUF8	E2RCF4;J9NUF8	tr|E2RCF4|E2RCF4_CANLF Replication factor C subunit 5 OS=Canis lupus familiaris GN=RFC5 PE=4 SV=1;tr|J9NUF8|J9NUF8_CANLF Replication factor C subunit 5 OS=Canis lupus familiaris GN=RFC5 PE=4 SV=1	2	5	5	4	17.1	38.286	339	8.7318	218970000	0.886091	0	0.909009	1.07122	0	1.0599	0.821295	0.842329
E2RCF9;J9P8W8;E2RCH9;E2QUE1;E2RCG0	E2RCF9;J9P8W8	tr|E2RCF9|E2RCF9_CANLF Uncharacterized protein OS=Canis lupus familiaris GN=PCBP2 PE=4 SV=2;tr|J9P8W8|J9P8W8_CANLF Uncharacterized protein OS=Canis lupus familiaris GN=PCBP2 PE=4 SV=1	5	13	8	8	46.2	34.917	331	49.856	12454000000	1.05528	0.876586	1.03697	1.02346	1.06888	1.01531	0.477819	0.955333
E2RCH6	E2RCH6	tr|E2RCH6|E2RCH6_CANLF NOP2 nucleolar protein OS=Canis lupus familiaris GN=NOP2 PE=3 SV=2	1	16	16	16	26.2	91.102	826	66.179	4278300000	0.996277	0.980962	0.983015	0.970861	1.00904	1.17194	0.360096	0.939213
E2RCJ3	E2RCJ3	tr|E2RCJ3|E2RCJ3_CANLF Transmembrane protein 214 OS=Canis lupus familiaris GN=TMEM214 PE=4 SV=2	1	10	10	10	13.8	76.818	687	19.62	1248700000	0.909129	0.916604	1.0162	1.05972	0.912999	1.15122	0.291837	0.909728
E2RCJ6	E2RCJ6	tr|E2RCJ6|E2RCJ6_CANLF Anion exchange protein OS=Canis lupus familiaris GN=SLC4A2 PE=3 SV=2	1	5	5	5	5.9	136.11	1236	19.712	376220000	0.910538	0.859005	1.28701	1.00323	0.643032	1.69566	0.791765	0.914607
E2RCK3;J9NTX5	E2RCK3;J9NTX5	tr|E2RCK3|E2RCK3_CANLF Cartilage associated protein OS=Canis lupus familiaris GN=CRTAP PE=4 SV=2;tr|J9NTX5|J9NTX5_CANLF Cartilage associated protein OS=Canis lupus familiaris GN=CRTAP PE=4 SV=1	2	1	1	1	2.7	48.025	412	3.6485	71055000	0.773964	0	0.868405	0.972138	0	1.12354	0.752194	0.783693
E2RCL4;E2QXS3	E2RCL4	tr|E2RCL4|E2RCL4_CANLF 40S ribosomal protein S21 OS=Canis lupus familiaris GN=RPS21 PE=3 SV=2	2	4	4	4	57.8	9.1113	83	28.065	8976200000	1.17516	1.26603	1.05475	1.02381	0.984815	1.10089	0.1398	1.12427
E2RCM8	E2RCM8	tr|E2RCM8|E2RCM8_CANLF Nuclear export mediator factor OS=Canis lupus familiaris GN=NEMF PE=4 SV=2	1	4	4	4	3.7	123.09	1078	6.405	123310000	1.25276	1.11688	0	1.0075	1.06098	0	0.857923	1.14559
E2RCN3	E2RCN3	tr|E2RCN3|E2RCN3_CANLF Cell division cycle 37 OS=Canis lupus familiaris GN=CDC37 PE=4 SV=1	1	9	9	9	32.6	44.625	380	60.094	2512400000	1.00967	1.05758	0.925541	1.04479	1.12685	0.990801	0.364029	0.946359
E2RCN8;F1PP70	E2RCN8;F1PP70	tr|E2RCN8|E2RCN8_CANLF Anoctamin OS=Canis lupus familiaris GN=ANO10 PE=3 SV=2;tr|F1PP70|F1PP70_CANLF Anoctamin OS=Canis lupus familiaris GN=ANO10 PE=3 SV=2	2	4	4	4	5.3	76.374	659	7.532	572490000	0.793003	0.778247	0.922613	0.98218	0.817682	1.19105	0.230892	0.833814
E2RCP9	E2RCP9	tr|E2RCP9|E2RCP9_CANLF Proteasome 26S subunit, non-ATPase 2 OS=Canis lupus familiaris GN=PSMD2 PE=4 SV=1	1	21	21	21	23.6	100.27	908	75.391	9216600000	0.98061	1.04698	0.973795	1.0573	1.00074	0.987954	0.662445	0.985352
E2RCR3	E2RCR3	tr|E2RCR3|E2RCR3_CANLF XPC complex subunit, DNA damage recognition and repair factor OS=Canis lupus familiaris GN=XPC PE=4 SV=2	1	3	3	3	4.2	105.72	949	7.0977	36451000	1.18181	0	0.851632	0.983339	0	0.772738	0.851103	1.15794
E2RCU9	E2RCU9	tr|E2RCU9|E2RCU9_CANLF Mitochondrial poly(A) polymerase OS=Canis lupus familiaris GN=MTPAP PE=4 SV=2	1	3	3	3	6.7	65.806	584	7.1795	89869000	1.07654	1.10228	1.08709	0.952184	0.958469	1.02896	0.0133794	1.111
E2RCX4	E2RCX4	tr|E2RCX4|E2RCX4_CANLF Structural maintenance of chromosomes protein OS=Canis lupus familiaris GN=SMC4 PE=3 SV=2	1	23	23	23	18.9	147.11	1288	60.528	2914700000	1.02166	1.06672	0.9481	1.04787	1.0318	1.14395	0.273628	0.941944
E2RCY1;E2RCX9;E2QRS9	E2RCY1;E2RCX9	tr|E2RCY1|E2RCY1_CANLF Family with sequence similarity 49 member B OS=Canis lupus familiaris GN=FAM49B PE=4 SV=1;tr|E2RCX9|E2RCX9_CANLF Family with sequence similarity 49 member B OS=Canis lupus familiaris GN=FAM49B PE=4 SV=2	3	11	11	11	45.1	36.72	324	36.574	1919600000	1.09613	1.14876	0.971561	0.987867	0.845652	0.877293	0.0682117	1.18653
E2RCY4	E2RCY4	tr|E2RCY4|E2RCY4_CANLF DnaJ homolog subfamily C member 10 OS=Canis lupus familiaris GN=DNAJC10 PE=4 SV=1	1	4	4	4	5.7	91.279	794	6.5721	105390000	0.88495	0.927075	1.12004	0.881771	0.944722	0.954346	0.542751	1.05438
E2RCY5;J9NXX3	E2RCY5;J9NXX3	tr|E2RCY5|E2RCY5_CANLF PHD finger protein 5A OS=Canis lupus familiaris GN=PHF5A PE=4 SV=2;tr|J9NXX3|J9NXX3_CANLF PHD finger protein 5A OS=Canis lupus familiaris GN=PHF5A PE=4 SV=1	2	4	4	4	43.1	11.488	102	10.579	702390000	0.795399	0.86884	0.585709	1.02815	1.15021	0.681094	0.283483	0.786845
E2RCZ7;E2RCZ6	E2RCZ7;E2RCZ6	tr|E2RCZ7|E2RCZ7_CANLF Core histone macro-H2A OS=Canis lupus familiaris GN=H2AFY PE=4 SV=1;tr|E2RCZ6|E2RCZ6_CANLF Core histone macro-H2A OS=Canis lupus familiaris GN=H2AFY PE=4 SV=2	2	15	15	14	48.9	39.617	372	199.47	11531000000	0.920544	0.809615	0.839329	0.937532	0.82878	0.79349	0.955659	1.00378
E2RD58;F1Q248	E2RD58;F1Q248	tr|E2RD58|E2RD58_CANLF Solute carrier family 25 member 18 (Fragment) OS=Canis lupus familiaris GN=SLC25A18 PE=3 SV=2;tr|F1Q248|F1Q248_CANLF Solute carrier family 25 member 18 OS=Canis lupus familiaris GN=SLC25A18 PE=3 SV=2	2	4	4	4	12	32.825	308	6.3172	203220000	1.03622	0.97575	0	1.01076	1.04038	0	0.979569	0.980902
E2RD59	E2RD59	tr|E2RD59|E2RD59_CANLF Ribosomal oxygenase 2 OS=Canis lupus familiaris GN=RIOX2 PE=4 SV=2	1	1	1	1	1.7	63.544	578	3.2484	114310000	0.900024	0.930262	0.883477	1.12794	1.04106	1.06111	0.00436542	0.840144
E2RD65	E2RD65	tr|E2RD65|E2RD65_CANLF Actin-related protein 2/3 complex subunit 5 OS=Canis lupus familiaris GN=ARPC5 PE=3 SV=2	1	4	4	4	39.5	12.093	114	61.244	3982800000	1.09852	1.06106	1.0148	1.01735	0.948376	0.96736	0.0645512	1.08227
E2RD70	E2RD70	tr|E2RD70|E2RD70_CANLF COP9 signalosome subunit 3 OS=Canis lupus familiaris GN=COPS3 PE=4 SV=1	1	5	5	5	12.8	47.903	423	18.402	370960000	1.07241	1.13618	1.10495	1.02663	0.767696	1.10179	0.247527	1.14413
F1PCU2;E2RD72	F1PCU2;E2RD72	tr|F1PCU2|F1PCU2_CANLF Discs large MAGUK scaffold protein 1 OS=Canis lupus familiaris GN=DLG1 PE=3 SV=2;tr|E2RD72|E2RD72_CANLF Discs large MAGUK scaffold protein 1 OS=Canis lupus familiaris GN=DLG1 PE=3 SV=2	2	3	3	3	3.6	103.44	927	5.3242	90421000	1.17263	0	0.838442	1.11914	0	1.0106	0.940584	0.944284
E2RD79	E2RD79	tr|E2RD79|E2RD79_CANLF DNA helicase OS=Canis lupus familiaris GN=MCM6 PE=3 SV=1	1	21	21	21	28.7	93.03	821	109.06	3982200000	1.07033	0.930636	0.990149	1.08748	1.17634	1.07707	0.0854027	0.895303
F1PCT3;E2RD85;Q9GKK5	F1PCT3;E2RD85;Q9GKK5	tr|F1PCT3|F1PCT3_CANLF Tubulin gamma chain OS=Canis lupus familiaris GN=LOC100856176 PE=3 SV=1;tr|E2RD85|E2RD85_CANLF Tubulin gamma chain OS=Canis lupus familiaris GN=LOC100856176 PE=3 SV=1;sp|Q9GKK5|TBG1_CANLF Tubulin gamma-1 chain OS=Canis lupus familiar	3	2	2	2	6.4	51.103	451	11.091	128660000	0	0.955334	0.948163	0	0.775696	0.977608	0.913968	1.08566
E2RD86;J9P1D3	E2RD86	tr|E2RD86|E2RD86_CANLF Protein disulfide-isomerase OS=Canis lupus familiaris GN=PDIA3 PE=3 SV=1	2	27	27	27	53.9	56.75	505	295.65	106000000000	0.945402	0.940738	1.01942	0.98098	0.93096	0.979784	0.886539	1.00479
E2RD87	E2RD87	tr|E2RD87|E2RD87_CANLF Family with sequence similarity 177 member A1 OS=Canis lupus familiaris GN=FAM177A1 PE=4 SV=2	1	3	3	3	20.2	23.883	213	11.553	69607000	1.05294	0	1.14806	0.884958	0	1.09292	0.88842	1.1128
E2RD90;J9P7W3	E2RD90;J9P7W3	tr|E2RD90|E2RD90_CANLF ST3 beta-galactoside alpha-2,3-sialyltransferase 4 OS=Canis lupus familiaris GN=ST3GAL4 PE=3 SV=2;tr|J9P7W3|J9P7W3_CANLF ST3 beta-galactoside alpha-2,3-sialyltransferase 4 OS=Canis lupus familiaris GN=ST3GAL4 PE=3 SV=1	2	3	3	3	9.7	37.715	330	6.479	272620000	1.07701	1.0681	0	0.973823	0.981754	0	0.902409	1.09692
E2RD92	E2RD92	tr|E2RD92|E2RD92_CANLF Malectin OS=Canis lupus familiaris GN=MLEC PE=4 SV=1	1	6	6	6	27	32.064	289	22.747	725540000	0.892255	1.17866	0.948063	1.08988	0.930689	0.977856	0.948447	1.00685
E2RD95;E2RRE2;E2R2S8	E2RD95;E2RRE2	tr|E2RD95|E2RD95_CANLF G protein subunit beta 2 OS=Canis lupus familiaris GN=GNB2 PE=4 SV=1;tr|E2RRE2|E2RRE2_CANLF G protein subunit beta 2 OS=Canis lupus familiaris GN=GNB2 PE=4 SV=1	3	11	11	6	35.3	37.331	340	93.527	13130000000	0.885512	0.858752	0.858112	1.052	0.983607	1.02355	0.00220854	0.850682
E2RDB1	E2RDB1	tr|E2RDB1|E2RDB1_CANLF Leucine zipper protein 1 OS=Canis lupus familiaris GN=LUZP1 PE=4 SV=1	1	4	4	4	3.8	119.77	1074	5.8781	103880000	0.789763	0	0.939549	1.06563	0	0.924427	0.854152	0.868976
E2RDB2;A0A0S2I8H5	E2RDB2	tr|E2RDB2|E2RDB2_CANLF Serine and arginine rich splicing factor 2 OS=Canis lupus familiaris GN=SRSF2 PE=4 SV=1	2	7	7	7	33.5	25.49	221	29.583	7568000000	0.895125	0.953431	0.940796	1.05561	0.979743	1.15927	0.0698518	0.87314
E2RDF9	E2RDF9	tr|E2RDF9|E2RDF9_CANLF Heterochromatin protein 1 binding protein 3 OS=Canis lupus familiaris GN=HP1BP3 PE=4 SV=1	1	13	13	13	21.7	61.295	553	26.808	1974200000	0.869825	0.819562	0.975796	1.03358	1.0081	1.09729	0.0410609	0.849062
E2RDH4	E2RDH4	tr|E2RDH4|E2RDH4_CANLF Zinc finger SWIM-type containing 8 OS=Canis lupus familiaris GN=ZSWIM8 PE=4 SV=2	1	1	1	1	0.6	193.81	1805	2.4211	20620000	0	1.35022	1.26932	0	0.817666	0.804995	0.553272	1.61434
E2RDI0	E2RDI0	tr|E2RDI0|E2RDI0_CANLF Canopy FGF signaling regulator 3 OS=Canis lupus familiaris GN=CNPY3 PE=4 SV=1	1	4	4	4	16.8	31.125	279	17.261	579580000	0.97863	1.11845	1.02624	0.948875	0.978127	1.07017	0.486826	1.04209
E2RDI6	E2RDI6	tr|E2RDI6|E2RDI6_CANLF Mitochondrial ribosomal protein L55 OS=Canis lupus familiaris GN=MRPL55 PE=4 SV=1	1	1	1	1	12.9	14.722	124	4.5205	240960000	0.982848	0.951051	0	0.884221	1.14468	0	0.949861	0.953175
E2RDJ0	E2RDJ0	tr|E2RDJ0|E2RDJ0_CANLF GRIP and coiled-coil domain containing 1 OS=Canis lupus familiaris GN=GCC1 PE=4 SV=1	1	3	3	3	3.5	87.62	775	4.2527	50817000	0.842583	1.0675	0	1.0954	1.58253	0	0.676495	0.713269
E2RDJ2;J9NXP8;E2RTD3	E2RDJ2;J9NXP8	tr|E2RDJ2|E2RDJ2_CANLF ADP ribosylation factor 5 OS=Canis lupus familiaris GN=ARF5 PE=3 SV=1;tr|J9NXP8|J9NXP8_CANLF ADP ribosylation factor 5 OS=Canis lupus familiaris GN=ARF5 PE=3 SV=1	3	7	2	2	47.2	20.529	180	4.4892	109180000	1.30092	0	1.28541	0.982979	0	0.885614	0.67652	1.38411
E2RDK4	E2RDK4	tr|E2RDK4|E2RDK4_CANLF Tubulin folding cofactor C OS=Canis lupus familiaris GN=TBCC PE=4 SV=1	1	2	2	2	7	38.501	345	6.0573	332100000	1.17097	1.05458	1.14152	1.06116	0.818039	0.952244	0.0853432	1.18917
E2RDK5	E2RDK5	tr|E2RDK5|E2RDK5_CANLF Protein phosphatase 1 regulatory subunit 13 like OS=Canis lupus familiaris GN=PPP1R13L PE=4 SV=2	1	2	2	2	4.1	89.709	834	8.2843	86743000	0.993288	0	0.950122	1.07334	0	0.846222	0.987042	1.01243
E2RDN4	E2RDN4	tr|E2RDN4|E2RDN4_CANLF O-acyltransferase OS=Canis lupus familiaris GN=DGAT1 PE=3 SV=2	1	4	4	4	9.6	55.764	489	8.7925	658210000	0.95463	0.846965	0.429895	1.10853	1.24135	0.333978	0.666836	0.831447
E2RDP4	E2RDP4	tr|E2RDP4|E2RDP4_CANLF Adhesion regulating molecule 1 OS=Canis lupus familiaris GN=ADRM1 PE=4 SV=1	1	7	7	7	18.7	42.03	406	24.432	1027200000	1.07085	0.952733	1.08109	1.03401	1.01765	1.08116	0.846258	0.991014
E2RDP7	E2RDP7	tr|E2RDP7|E2RDP7_CANLF Uncharacterized protein OS=Canis lupus familiaris GN=LOC478720 PE=4 SV=1	1	1	1	1	9.6	11.751	114	2.4574	822200000	0.837689	0.678318	0	1.08277	1.22555	0	0.599969	0.656759
J9P1W9;E2RDQ1	J9P1W9;E2RDQ1	tr|J9P1W9|J9P1W9_CANLF PAK1 interacting protein 1 OS=Canis lupus familiaris GN=PAK1IP1 PE=4 SV=1;tr|E2RDQ1|E2RDQ1_CANLF PAK1 interacting protein 1 OS=Canis lupus familiaris GN=PAK1IP1 PE=4 SV=1	2	2	2	2	3.8	43.761	391	2.2955	64206000	0.970273	0	0.931084	0.905905	0	1.01545	0.988932	0.98959
E2RDT8	E2RDT8	tr|E2RDT8|E2RDT8_CANLF Thioredoxin 2 OS=Canis lupus familiaris GN=TXN2 PE=4 SV=2	1	1	1	1	13	21.089	192	46.081	166740000	0.96165	1.15885	0.0971064	0.963752	1.05808	0.286249	0.944449	0.960801
E2RDU5	E2RDU5	tr|E2RDU5|E2RDU5_CANLF Uncharacterized protein OS=Canis lupus familiaris GN=NDUFA5 PE=4 SV=1	1	2	2	2	16.4	13.363	116	3.961	1003100000	0.949693	1.0539	1.02966	0.94783	0.842272	0.880274	0.0517233	1.13589
E2RDX0	E2RDX0	tr|E2RDX0|E2RDX0_CANLF Uncharacterized protein OS=Canis lupus familiaris PE=3 SV=2	1	3	3	3	7.9	32.016	292	4.0263	110150000	0.924927	0	0.973517	1.14859	0	0.958935	0.890703	0.900793
E2RDX1	E2RDX1	tr|E2RDX1|E2RDX1_CANLF Rab interacting lysosomal protein like 1 OS=Canis lupus familiaris GN=RILPL1 PE=4 SV=1	1	2	2	2	7.4	47.027	403	11.25	47646000	0	1.14181	0.782997	0	0.779975	0.650537	0.711353	1.34554
E2RDX2	E2RDX2	tr|E2RDX2|E2RDX2_CANLF Charged multivesicular body protein 4B OS=Canis lupus familiaris GN=CHMP4B PE=3 SV=1	1	5	5	5	21.9	24.983	224	14.961	1071300000	0.988391	1.07427	1.04499	1.14758	0.840143	1.1824	0.861098	0.980294
E2RDY8	E2RDY8	tr|E2RDY8|E2RDY8_CANLF Cystathionine gamma-lyase OS=Canis lupus familiaris GN=CTH PE=3 SV=1	1	10	10	10	25.2	44.33	405	29.191	1854800000	1.00421	1.16659	0.932947	0.968385	0.955194	1.02264	0.507079	1.05347
E2RDZ4	E2RDZ4	tr|E2RDZ4|E2RDZ4_CANLF Eukaryotic translation initiation factor 4A3 OS=Canis lupus familiaris GN=EIF4A3 PE=3 SV=1	1	16	12	12	36.3	46.81	411	47.83	9289500000	0.869529	0.95139	0.883579	0.996954	0.853783	1.04528	0.366889	0.933868
E2RDZ6	E2RDZ6	sp|E2RDZ6|SIR5_CANLF NAD-dependent protein deacylase sirtuin-5, mitochondrial OS=Canis lupus familiaris GN=SIRT5 PE=3 SV=1	1	2	2	2	7.4	33.942	310	3.7194	107320000	1.1384	0	1.01566	0.926657	0	0.806333	0.777093	1.24297
E2RE10	E2RE10	tr|E2RE10|E2RE10_CANLF Mitochondrial ribosomal protein S12 OS=Canis lupus familiaris GN=MRPS12 PE=3 SV=1	1	2	2	2	26.6	15.426	139	4.5516	190160000	0.878819	0.777273	0	0.874304	0.982495	0	0.880279	0.891907
E2RE13	E2RE13	tr|E2RE13|E2RE13_CANLF ADP ribosylation factor like GTPase 8B OS=Canis lupus familiaris GN=ARL8B PE=3 SV=1	1	3	3	3	14.5	21.539	186	6.0882	2939800000	0.934368	1.01508	1.09708	1.0227	1.02312	1.02163	0.889173	0.99318
E2RE16;F1PAG1	E2RE16	tr|E2RE16|E2RE16_CANLF p21 (RAC1) activated kinase 4 OS=Canis lupus familiaris GN=PAK4 PE=4 SV=1	2	4	4	4	9.5	64.182	592	9.1032	76191000	1.051	0	1.01226	0.965054	0	1.02715	0.96289	1.03567
J9P2Y5;E2RE19	J9P2Y5;E2RE19	tr|J9P2Y5|J9P2Y5_CANLF Protein MAK16 homolog OS=Canis lupus familiaris GN=MAK16 PE=3 SV=1;tr|E2RE19|E2RE19_CANLF Protein MAK16 homolog OS=Canis lupus familiaris GN=MAK16 PE=3 SV=2	2	4	4	4	16.6	35.155	296	9.684	177540000	0.899964	0.914786	0	0.934452	1.0246	0	0.919284	0.926343
E2RE39	E2RE39	tr|E2RE39|E2RE39_CANLF Adenylate kinase 2, mitochondrial OS=Canis lupus familiaris GN=AK2 PE=3 SV=2	1	13	13	13	57.3	26.57	241	80.061	20621000000	1.00341	0.933934	1.10734	0.972565	0.881817	0.975951	0.293023	1.07574
E2RE50	E2RE50	tr|E2RE50|E2RE50_CANLF BCS1 homolog, ubiquinol-cytochrome c reductase complex chaperone OS=Canis lupus familiaris GN=BCS1L PE=3 SV=1	1	3	3	3	8.6	47.251	419	4.1879	375660000	1.0229	1.15065	0.897612	1.02537	0.962454	1.02459	0.809296	1.0195
E2RE57	E2RE57	tr|E2RE57|E2RE57_CANLF Ectonucleoside triphosphate diphosphohydrolase 3 OS=Canis lupus familiaris GN=ENTPD3 PE=3 SV=1	1	8	8	8	15.1	59.243	529	22.025	1764000000	0.949668	0.991543	0.881518	1.03931	0.993902	1.08759	0.0769385	0.904488
E2RE90;J9JHK6	E2RE90;J9JHK6	tr|E2RE90|E2RE90_CANLF SEC24 homolog C, COPII coat complex component OS=Canis lupus familiaris GN=SEC24C PE=4 SV=1;tr|J9JHK6|J9JHK6_CANLF SEC24 homolog C, COPII coat complex component OS=Canis lupus familiaris GN=SEC24C PE=4 SV=1	2	8	8	8	8.2	118.6	1096	14.582	714740000	1.00821	1.09888	1.13644	1.05491	1.00396	0.974423	0.192291	1.06931
E2REA4	E2REA4	tr|E2REA4|E2REA4_CANLF Uncharacterized protein OS=Canis lupus familiaris GN=YWHAQ PE=3 SV=2	1	6	2	2	19.3	27.229	243	18.535	1532200000	0.885947	1.00879	0.938095	0.836886	0.915467	1.02862	0.80648	1.01865
E2REA8	E2REA8	tr|E2REA8|E2REA8_CANLF COP9 signalosome subunit 2 OS=Canis lupus familiaris GN=COPS2 PE=4 SV=2	1	6	6	6	12.9	51.596	443	19.284	993900000	1.00079	1.08823	1.04267	1.06026	0.986714	0.945837	0.331557	1.0464
E2REA9	E2REA9	tr|E2REA9|E2REA9_CANLF Integrin subunit alpha 2 OS=Canis lupus familiaris GN=ITGA2 PE=3 SV=2	1	14	14	14	15.9	129.67	1179	108.75	3916100000	0.961146	0.916988	0.930384	0.912416	0.970794	1.1125	0.362959	0.937513
E2REB1	E2REB1	tr|E2REB1|E2REB1_CANLF Structural maintenance of chromosomes flexible hinge domain containing 1 OS=Canis lupus familiaris GN=SMCHD1 PE=4 SV=2	1	5	5	5	2.2	225.77	2005	11.879	163530000	0.843009	0.998979	1.36307	0.985192	1.15277	0.86968	0.725448	1.06564
E2REB4	E2REB4	tr|E2REB4|E2REB4_CANLF Probable cytosolic iron-sulfur protein assembly protein CIAO1 OS=Canis lupus familiaris GN=CIAO1 PE=3 SV=2	1	3	3	3	13.9	37.865	339	6.1562	131390000	1.15901	1.16684	1.03559	1.1465	0.881954	1.12958	0.516843	1.06441
E2RED3	E2RED3	tr|E2RED3|E2RED3_CANLF COP9 signalosome subunit 7A OS=Canis lupus familiaris GN=COPS7A PE=4 SV=1	1	3	3	3	16.4	30.306	275	33.383	692730000	1.10007	1.3452	1.24871	0.975822	1.07079	1.11134	0.0943704	1.16974
J9P3J2;E2RED7;J9PAU7	J9P3J2;E2RED7;J9PAU7	tr|J9P3J2|J9P3J2_CANLF Bromodomain adjacent to zinc finger domain 1B OS=Canis lupus familiaris GN=BAZ1B PE=4 SV=1;tr|E2RED7|E2RED7_CANLF Bromodomain adjacent to zinc finger domain 1B OS=Canis lupus familiaris GN=BAZ1B PE=4 SV=2;tr|J9PAU7|J9PAU7_CANLF Bromo	3	8	8	8	5.5	160.15	1392	14.415	1019700000	0.974799	0.900829	1.02979	0.964199	0.904384	1.07169	0.859521	0.988145
E2REF0	E2REF0	tr|E2REF0|E2REF0_CANLF SWI/SNF related, matrix associated, actin dependent regulator of chromatin subfamily c member 1 OS=Canis lupus familiaris GN=SMARCC1 PE=4 SV=1	1	13	13	9	13.4	122.86	1107	40.385	1754900000	0.874179	0.869889	0.712459	1.0071	1.26811	0.804541	0.223487	0.797638
E2REH5;J9NTM3	E2REH5	tr|E2REH5|E2REH5_CANLF Acetyl-CoA acyltransferase 1 OS=Canis lupus familiaris GN=ACAA1 PE=3 SV=1	2	5	5	5	20.9	44.083	426	32.107	737080000	1.02282	1.00082	1.01196	1.0029	1.28205	0.934604	0.595521	0.942865
E2REJ7	E2REJ7	tr|E2REJ7|E2REJ7_CANLF PC4 and SFRS1 interacting protein 1 OS=Canis lupus familiaris GN=PSIP1 PE=4 SV=2	1	8	8	8	13.5	64.799	572	16.839	3604900000	0.942087	0.992228	1.13018	1.0261	0.966005	0.954803	0.551981	1.0399
E2REK3	E2REK3	tr|E2REK3|E2REK3_CANLF Eukaryotic translation initiation factor 3 subunit D OS=Canis lupus familiaris GN=EIF3D PE=3 SV=2	1	14	14	14	35.6	63.932	548	111.32	5418200000	1.02912	1.04279	1.11071	1.02932	1.10177	0.938873	0.521053	1.0367
E2REK5	E2REK5	tr|E2REK5|E2REK5_CANLF Transportin 3 OS=Canis lupus familiaris GN=TNPO3 PE=4 SV=2	1	8	8	8	8.7	104.22	923	19.686	883970000	1.03108	1.13689	0.813985	1.09125	1.005	0.919755	0.920763	0.988712
E2REK6;J9NWJ7;E2R8S4;J9NWQ5;J9NXY2;J9NT19;F1PIN6	E2REK6;J9NWJ7;E2R8S4;J9NWQ5;J9NXY2	tr|E2REK6|E2REK6_CANLF Calmodulin 1 OS=Canis lupus familiaris GN=CALM1 PE=4 SV=1;tr|J9NWJ7|J9NWJ7_CANLF Uncharacterized protein OS=Canis lupus familiaris PE=4 SV=1;tr|E2R8S4|E2R8S4_CANLF Calmodulin 2 OS=Canis lupus familiaris GN=CALM2 PE=4 SV=2;tr|J9NWQ5|J	7	11	11	11	65.1	16.837	149	143.83	41951000000	0.797821	0.940256	1.00295	1.17376	1.28169	0.896376	0.19188	0.817772
E2REM0	E2REM0	tr|E2REM0|E2REM0_CANLF Cytochrome c1 OS=Canis lupus familiaris GN=CYC1 PE=4 SV=1	1	7	7	7	22.8	35.28	325	22.305	3960800000	1.0227	0.918982	0.885412	1.00252	0.982525	0.961235	0.407844	0.959546
E2REN0;F1P7I1;L7N055	E2REN0;F1P7I1;L7N055	tr|E2REN0|E2REN0_CANLF Adenosylhomocysteinase OS=Canis lupus familiaris GN=AHCYL1 PE=3 SV=2;tr|F1P7I1|F1P7I1_CANLF Adenosylhomocysteinase OS=Canis lupus familiaris GN=AHCYL1 PE=3 SV=1;tr|L7N055|L7N055_CANLF Adenosylhomocysteinase OS=Canis lupus familiaris	3	9	9	9	18.2	57.325	517	27.519	1243000000	1.09172	1.13575	1.21068	0.947237	0.968768	0.954262	0.00583625	1.19785
E2REP2	E2REP2	tr|E2REP2|E2REP2_CANLF TRK-fused gene OS=Canis lupus familiaris GN=TFG PE=4 SV=1	1	5	5	5	18.7	43.305	401	35.758	1450500000	1.29151	1.09443	1.21068	0.915037	1.10404	1.04071	0.0881774	1.17545
E2RER0	E2RER0	tr|E2RER0|E2RER0_CANLF WW domain binding protein 11 OS=Canis lupus familiaris GN=WBP11 PE=4 SV=1	1	8	8	8	13.9	70.087	641	17.929	263120000	1.14336	1.18769	0.570301	1.18333	1.48827	0.79441	0.541795	0.837087
E2RER1;J9P878;E2QX79;F1Q4C6	E2RER1	tr|E2RER1|E2RER1_CANLF Uncharacterized protein OS=Canis lupus familiaris PE=4 SV=2	4	9	1	1	20	42.503	395	39.661	3440000000	1.18846	1.23653	1.0216	0.890057	1.08888	1.39632	0.889761	1.02113
E2RET1;E2RNS5	E2RET1;E2RNS5	tr|E2RET1|E2RET1_CANLF High density lipoprotein binding protein OS=Canis lupus familiaris GN=HDLBP PE=4 SV=1;tr|E2RNS5|E2RNS5_CANLF High density lipoprotein binding protein OS=Canis lupus familiaris GN=HDLBP PE=4 SV=1	2	20	20	20	18.2	141.62	1268	142.41	4011400000	1.13804	1.12246	1.14049	0.98675	0.945214	1.07141	0.0242582	1.13239
E2REU6;J9P8A2;J9P314;J9P1Z1;J9NSH7;L7N0H0;E2R3Y6;L7N0G9;E2R7T3;L7N0H1;E2R309;F1PZD8;E2R261;E2R3W2;E2R708;L7N0G8	E2REU6	tr|E2REU6|E2REU6_CANLF Uncharacterized protein OS=Canis lupus familiaris GN=KRT18 PE=3 SV=2	16	34	32	32	72.9	49.792	447	323.31	1030000000000	0.883021	0.841979	0.866488	0.951953	1.07099	1.01454	0.0150273	0.853169
E2REU7	E2REU7	tr|E2REU7|E2REU7_CANLF SPT16 homolog, facilitates chromatin remodeling subunit OS=Canis lupus familiaris GN=SUPT16H PE=4 SV=1	1	19	19	18	20.6	119.96	1047	103.27	3607900000	0.961407	0.993372	0.84359	0.989549	1.01794	0.912502	0.50469	0.958348
E2REW0	E2REW0	tr|E2REW0|E2REW0_CANLF Mitochondrial calcium uptake 2 OS=Canis lupus familiaris GN=MICU2 PE=4 SV=1	1	3	3	3	9.2	49.563	433	8.2229	299760000	0.905509	0	0.914263	0.999377	0	1.18269	0.812421	0.833966
E2REW4	E2REW4	tr|E2REW4|E2REW4_CANLF Core-binding factor beta subunit OS=Canis lupus familiaris GN=CBFB PE=4 SV=2	1	2	2	2	12.3	19.645	187	6.6587	239470000	1.5315	1.21694	1.32801	1.32733	0.931244	1.10043	0.179423	1.21358
E2REX3	E2REX3	tr|E2REX3|E2REX3_CANLF TNFRSF1A associated via death domain OS=Canis lupus familiaris GN=TRADD PE=4 SV=1	1	4	4	4	14.7	34.523	312	12.39	271430000	1.08217	0	1.11694	1.00236	0	1.16555	0.984912	1.01439
E2RF02	E2RF02	tr|E2RF02|E2RF02_CANLF Ubiquitin protein ligase E3 component n-recognin 4 OS=Canis lupus familiaris GN=UBR4 PE=4 SV=1	1	26	26	26	7.1	573.44	5181	72.336	1108600000	1.05875	1.06573	0.942298	1.03864	0.973893	0.989733	0.654309	1.02149
E2RF06	E2RF06	tr|E2RF06|E2RF06_CANLF Importin 5 OS=Canis lupus familiaris GN=IPO5 PE=4 SV=2	1	16	16	16	20.4	123.04	1089	104.23	6551700000	1.08971	1.15783	1.03509	1.04277	0.957216	1.04457	0.157682	1.0782
E2RF07	E2RF07	tr|E2RF07|E2RF07_CANLF NADH:ubiquinone oxidoreductase complex assembly factor 2 OS=Canis lupus familiaris GN=NDUFAF2 PE=4 SV=1	1	4	4	4	24.9	19.368	169	9.5451	233460000	0.864182	0	0.779539	1.10862	0	1.23661	0.65122	0.700878
E2RF17	E2RF17	tr|E2RF17|E2RF17_CANLF U3 small nucleolar ribonucleoprotein protein MPP10 OS=Canis lupus familiaris GN=MPHOSPH10 PE=3 SV=1	1	3	3	3	5.5	78.295	676	10.105	155590000	0.96333	0	0.703683	1.05568	0	1.07548	0.752064	0.782209
E2RF27	E2RF27	tr|E2RF27|E2RF27_CANLF UBX domain protein 4 OS=Canis lupus familiaris GN=UBXN4 PE=4 SV=2	1	3	3	3	10.1	56.514	507	76.376	289190000	0.925002	1.41435	0.967628	0.987355	0.958938	1.06034	0.563992	1.09989
E2RF39	E2RF39	tr|E2RF39|E2RF39_CANLF Phosducin like 3 OS=Canis lupus familiaris GN=PDCL3 PE=4 SV=1	1	2	2	2	8.8	27.616	240	2.7042	122840000	1.16835	1.09494	0.900027	1.10082	0.941834	0.85923	0.460868	1.09009
E2RF73	E2RF73	tr|E2RF73|E2RF73_CANLF DNA helicase OS=Canis lupus familiaris GN=MCM3 PE=3 SV=2	1	23	23	23	32.4	91.057	808	82.531	4355400000	0.96147	0.975547	0.96273	1.07809	1.06711	1.11496	0.00137104	0.889448
E2RF81	E2RF81	tr|E2RF81|E2RF81_CANLF Treacle ribosome biogenesis factor 1 OS=Canis lupus familiaris GN=TCOF1 PE=4 SV=2	1	3	2	2	6.2	44.441	435	3.0019	189380000	0.823856	0.894385	0.671048	1.18197	1.64996	0.538776	0.376038	0.708838
E2RF86	E2RF86	tr|E2RF86|E2RF86_CANLF CCR4-NOT transcription complex subunit 11 OS=Canis lupus familiaris GN=CNOT11 PE=4 SV=2	1	2	2	2	4.4	55.616	517	6.4103	12679000	1.17563	0	0.896248	1.06415	0	0.991477	0.99177	1.0079
E2RFA3	E2RFA3	tr|E2RFA3|E2RFA3_CANLF RNA helicase OS=Canis lupus familiaris GN=DDX18 PE=3 SV=2	1	12	12	12	21.2	75.187	669	64.99	2573900000	0.989154	0.918839	0.891327	0.93785	1.0827	0.935037	0.410972	0.947127
E2RFA4	E2RFA4	tr|E2RFA4|E2RFA4_CANLF WW domain binding protein 2 OS=Canis lupus familiaris GN=WBP2 PE=4 SV=2	1	2	2	2	3.8	28.527	265	3.4477	88822000	0	0.954505	0.84275	0	0.978578	0.954593	0.923148	0.929693
E2RFC7;J9P858	E2RFC7;J9P858	tr|E2RFC7|E2RFC7_CANLF Uncharacterized protein OS=Canis lupus familiaris GN=C8H14orf166 PE=4 SV=1;tr|J9P858|J9P858_CANLF Uncharacterized protein OS=Canis lupus familiaris PE=4 SV=1	2	11	11	11	44.3	28.065	244	43.094	3468400000	0.940681	1.11413	1.04148	1.06201	0.972895	1.08279	0.911891	0.993136
E2RFC9	E2RFC9	tr|E2RFC9|E2RFC9_CANLF Nuclear cap-binding protein subunit 2 OS=Canis lupus familiaris GN=NCBP2 PE=3 SV=1	1	2	2	2	12.2	18.001	156	6.706	535350000	0.886931	0.983691	1.00991	1.11664	1.03616	1.18044	0.0545137	0.864184
J9P3K8;E2RFD0	J9P3K8;E2RFD0	tr|J9P3K8|J9P3K8_CANLF 3-hydroxymethyl-3-methylglutaryl-CoA lyase OS=Canis lupus familiaris GN=HMGCL PE=4 SV=1;tr|E2RFD0|E2RFD0_CANLF 3-hydroxymethyl-3-methylglutaryl-CoA lyase OS=Canis lupus familiaris GN=HMGCL PE=4 SV=1	2	5	5	5	21.7	26.878	253	28.161	752650000	0.798185	0.983355	1.03692	1.01154	0.87808	0.90955	0.941815	1.00689
E2RFD6	E2RFD6	tr|E2RFD6|E2RFD6_CANLF DnaJ heat shock protein family (Hsp40) member C9 OS=Canis lupus familiaris GN=DNAJC9 PE=4 SV=2	1	2	2	2	9.7	22.8	195	4.8141	303800000	0.981747	1.05094	0.716004	1.08942	1.06763	0.692969	0.847123	0.964448
E2RFF0	E2RFF0	tr|E2RFF0|E2RFF0_CANLF Ras homolog enriched in brain OS=Canis lupus familiaris GN=RHEB PE=4 SV=1	1	5	5	5	24.5	20.479	184	10.131	294470000	0	1.05951	1.08862	0	0.738784	0.958216	0.760488	1.26584
E2RFF1	E2RFF1	tr|E2RFF1|E2RFF1_CANLF DEAD-box helicase 42 OS=Canis lupus familiaris GN=DDX42 PE=4 SV=1	1	13	13	13	18	102.15	933	69.909	1931000000	0.958961	0.995305	0.876627	1.03618	1.13583	1.11144	0.0308697	0.86217
E2RFH3	E2RFH3	tr|E2RFH3|E2RFH3_CANLF Enhancer of mRNA decapping 3 OS=Canis lupus familiaris GN=EDC3 PE=4 SV=1	1	3	3	3	5.9	56.099	508	5.6577	72857000	1.06988	0	1.02538	1.32314	0	1.27964	0.776552	0.805008
E2RFN7	E2RFN7	tr|E2RFN7|E2RFN7_CANLF Mitochondrial ribosomal protein S7 OS=Canis lupus familiaris GN=MRPS7 PE=4 SV=1	1	3	3	3	16.5	28.206	242	13.644	310120000	0.894483	1.13859	0.859167	1.04045	0.937305	1.15254	0.50182	0.923954
E2RFQ2	E2RFQ2	tr|E2RFQ2|E2RFQ2_CANLF Transmembrane and ubiquitin like domain containing 1 OS=Canis lupus familiaris GN=TMUB1 PE=4 SV=1	1	2	2	2	8.5	26.288	246	3.0996	116790000	1.0404	1.01225	0	0.981477	0.778216	0	0.840384	1.16648
E2RFR0	E2RFR0	tr|E2RFR0|E2RFR0_CANLF 40S ribosomal protein S8 OS=Canis lupus familiaris GN=RPS8 PE=3 SV=1	1	8	8	8	45.7	24.205	208	99.114	30251000000	1.13094	0.998009	1.03602	0.943976	1.07839	1.09302	0.802223	1.01591
E2RFR4;E2QSW2;E2RIA5;E2RC93;F1PWY4	E2RFR4	tr|E2RFR4|E2RFR4_CANLF RAB3D, member RAS oncogene family OS=Canis lupus familiaris GN=RAB3D PE=4 SV=2	5	4	3	1	19	24.572	221	5.6823	243890000	0.962798	0	1.0648	0.856701	0	0.917471	0.860338	1.14284
E2RFR5	E2RFR5	tr|E2RFR5|E2RFR5_CANLF Dynein light chain LC8-type 2 OS=Canis lupus familiaris GN=DYNLL2 PE=4 SV=1	1	4	4	2	56	10.55	91	26.36	1118000000	0.881205	1.05603	0.995318	1.06175	1.02166	1.08385	0.223661	0.925897
E2RFT3	E2RFT3	tr|E2RFT3|E2RFT3_CANLF PAF1 homolog, Paf1/RNA polymerase II complex component OS=Canis lupus familiaris GN=PAF1 PE=4 SV=2	1	4	4	4	7.5	75.939	667	10.837	334850000	0.90249	0.810991	0.850887	1.1389	0.917805	1.11903	0.0539856	0.807488
F1P6Z3;E2RFV4	F1P6Z3;E2RFV4	tr|F1P6Z3|F1P6Z3_CANLF N-ethylmaleimide sensitive factor, vesicle fusing ATPase OS=Canis lupus familiaris GN=NSF PE=4 SV=1;tr|E2RFV4|E2RFV4_CANLF N-ethylmaleimide sensitive factor, vesicle fusing ATPase OS=Canis lupus familiaris GN=NSF PE=4 SV=2	2	18	18	17	26.8	82.845	745	66.526	2244700000	0.967123	0.99194	1.03704	1.04033	0.998963	1.05641	0.281235	0.967827
E2RFV7;F1Q2B2	E2RFV7	tr|E2RFV7|E2RFV7_CANLF Heterogeneous nuclear ribonucleoprotein A3 OS=Canis lupus familiaris GN=HNRNPA3 PE=4 SV=2	2	16	14	14	47.4	39.594	378	178.28	25244000000	0.797613	0.696224	0.843107	0.985904	1.19582	0.906502	0.0605447	0.756726
F1P8W2;E2RFY5	F1P8W2;E2RFY5	tr|F1P8W2|F1P8W2_CANLF Protein arginine methyltransferase 3 OS=Canis lupus familiaris GN=PRMT3 PE=3 SV=2;tr|E2RFY5|E2RFY5_CANLF Protein arginine methyltransferase 3 OS=Canis lupus familiaris GN=PRMT3 PE=3 SV=2	2	3	3	3	7.7	51.347	454	5.2508	109620000	1.08626	1.11489	1.0164	1.14384	1.04627	1.10721	0.550251	0.97581
E2RFZ4;J9P499	E2RFZ4;J9P499	tr|E2RFZ4|E2RFZ4_CANLF STE20 like kinase OS=Canis lupus familiaris GN=SLK PE=4 SV=1;tr|J9P499|J9P499_CANLF STE20 like kinase OS=Canis lupus familiaris GN=SLK PE=4 SV=1	2	9	9	9	8.4	143.63	1242	31.759	579710000	1.21427	1.46387	1.01398	0.878268	1.3041	0.73792	0.2961	1.2643
J9P7S2;E2RG15	J9P7S2;E2RG15	tr|J9P7S2|J9P7S2_CANLF Synaptopodin OS=Canis lupus familiaris GN=SYNPO PE=4 SV=1;tr|E2RG15|E2RG15_CANLF Synaptopodin OS=Canis lupus familiaris GN=SYNPO PE=4 SV=2	2	4	4	4	7.8	84.048	786	43.881	539790000	0.933084	0.963246	1.09937	1.00254	1.18639	1.15323	0.204512	0.896333
E2RG17;J9NSQ8;E2QYG0	E2RG17;J9NSQ8;E2QYG0	tr|E2RG17|E2RG17_CANLF Ribosome assembly factor mrt4 OS=Canis lupus familiaris GN=MRTO4 PE=3 SV=1;tr|J9NSQ8|J9NSQ8_CANLF Ribosome assembly factor mrt4 OS=Canis lupus familiaris GN=MRTO4 PE=3 SV=1;tr|E2QYG0|E2QYG0_CANLF Ribosome assembly factor mrt4 OS=Cani	3	7	7	7	28.8	27.541	240	27.813	5492500000	0.900037	0.909571	0.857693	1.0698	1.07099	0.997687	0.00564097	0.849871
E2RG21	E2RG21	tr|E2RG21|E2RG21_CANLF High mobility group nucleosome binding domain 1 OS=Canis lupus familiaris GN=HMGN1 PE=4 SV=2	1	3	3	3	29.7	10.759	101	8.2505	986830000	1.07739	1.11092	0.942807	1.10662	1.186	1.08431	0.24332	0.927208
E2RG35	E2RG35	tr|E2RG35|E2RG35_CANLF RNA binding motif protein 22 OS=Canis lupus familiaris GN=RBM22 PE=4 SV=1	1	6	6	6	15.4	47.065	422	12.028	399550000	0.965253	0.929946	0	0.993486	1.02587	0	0.932893	0.938515
E2RG47	E2RG47	sp|E2RG47|STT3B_CANLF Dolichyl-diphosphooligosaccharide--protein glycosyltransferase subunit STT3B OS=Canis lupus familiaris GN=STT3B PE=1 SV=1	1	8	6	6	9.3	93.67	826	21.566	2158400000	0.855009	0.963672	1.00656	1.05229	1.03808	1.27293	0.112347	0.84002
J9NSM4;E2RG94	J9NSM4;E2RG94	tr|J9NSM4|J9NSM4_CANLF Protoporphyrinogen oxidase OS=Canis lupus familiaris GN=PPOX PE=3 SV=1;tr|E2RG94|E2RG94_CANLF Protoporphyrinogen oxidase OS=Canis lupus familiaris GN=PPOX PE=3 SV=1	2	3	3	3	10	38.775	369	8.7821	173830000	0.925707	0.976788	0.803755	1.07369	0.930682	0.798797	0.749729	0.965426
E2RGA2;J9P0G2	E2RGA2;J9P0G2	tr|E2RGA2|E2RGA2_CANLF Pescadillo homolog OS=Canis lupus familiaris GN=PES1 PE=3 SV=2;tr|J9P0G2|J9P0G2_CANLF Pescadillo homolog OS=Canis lupus familiaris GN=PES1 PE=3 SV=1	2	10	10	10	20.9	67.865	585	92.919	1305100000	0.94642	0.878744	0.610608	1.00818	1.03976	0.616264	0.678257	0.914258
E2RGC2	E2RGC2	tr|E2RGC2|E2RGC2_CANLF Chromosome 19 open reading frame 66 OS=Canis lupus familiaris GN=C19orf66 PE=4 SV=2	1	2	2	2	7	32.352	285	4.3918	74034000	1.36867	0	1.18221	0.999961	0	1.07073	0.785731	1.23189
E2RGC6	E2RGC6	tr|E2RGC6|E2RGC6_CANLF Mitogen-activated protein kinase 1 interacting protein 1 like OS=Canis lupus familiaris GN=MAPK1IP1L PE=4 SV=1	1	1	1	1	7	24.209	244	6.3779	301780000	1.73142	0	1.12117	0.939084	0	0.795677	0.558875	1.64437
E2RGE0	E2RGE0	tr|E2RGE0|E2RGE0_CANLF Barrier to autointegration factor 1 OS=Canis lupus familiaris GN=BANF1 PE=4 SV=1	1	3	3	3	34.8	10.058	89	25.165	2880600000	1.03334	1.12777	1.22586	1.03174	0.928538	1.03382	0.116409	1.13121
E2RGE3	E2RGE3	tr|E2RGE3|E2RGE3_CANLF Uncharacterized protein OS=Canis lupus familiaris GN=P2RY11 PE=3 SV=2	1	6	6	6	10.6	63.035	559	17.961	421790000	0.901284	0.833166	0.933694	1.12374	0.996511	1.08137	0.0203515	0.833374
E2RGF0	E2RGF0	tr|E2RGF0|E2RGF0_CANLF Transforming acidic coiled-coil containing protein 3 OS=Canis lupus familiaris GN=TACC3 PE=4 SV=1	1	1	1	1	1.4	86.085	788	5.0244	99539000	1.60674	1.4561	1.39624	1.4018	1.02202	1.17468	0.0865714	1.23915
E2RGF2	E2RGF2	tr|E2RGF2|E2RGF2_CANLF WD repeat domain 82 OS=Canis lupus familiaris GN=WDR82 PE=4 SV=1	1	3	3	3	13.1	35.079	313	8.3378	212470000	0	0.670266	0.967463	0	0.993581	1.06778	0.768174	0.794489
I2FJU1;E2RGF3	I2FJU1;E2RGF3	tr|I2FJU1|I2FJU1_CANLF Na(+)/H(+) exchange regulatory cofactor NHE-RF OS=Canis lupus familiaris GN=SLC9A3R1 PE=2 SV=1;tr|E2RGF3|E2RGF3_CANLF Na(+)/H(+) exchange regulatory cofactor NHE-RF OS=Canis lupus familiaris GN=SLC9A3R1 PE=4 SV=2	2	13	13	13	37.2	39.339	366	51.433	7644700000	1.2342	1.38644	1.05987	1.00484	0.920192	0.739596	0.0506891	1.38125
E2RGG6	E2RGG6	tr|E2RGG6|E2RGG6_CANLF Eukaryotic translation initiation factor 3 subunit G OS=Canis lupus familiaris GN=EIF3G PE=3 SV=1	1	10	10	10	34.4	35.567	320	45.361	5985200000	0.957553	0.975876	0.914272	1.07548	1.16885	1.05513	0.0188845	0.86308
E2RGH8;E2RCD4	E2RGH8	tr|E2RGH8|E2RGH8_CANLF Kinesin light chain 2 OS=Canis lupus familiaris GN=KLC2 PE=4 SV=2	2	4	4	4	7.4	68.611	621	6.4686	99312000	0.796703	1.03662	1.00858	0.962794	1.06429	1.07855	0.354603	0.91508
K9J6N9;E2RGI3;J9PAP5;J9P5W0	K9J6N9;E2RGI3;J9PAP5;J9P5W0	tr|K9J6N9|K9J6N9_CANLF U1 small nuclear ribonucleoprotein C OS=Canis lupus familiaris GN=SNRPC PE=3 SV=1;sp|E2RGI3|RU1C_CANLF U1 small nuclear ribonucleoprotein C OS=Canis lupus familiaris GN=SNRPC PE=3 SV=1;tr|J9PAP5|J9PAP5_CANLF U1 small nuclear ribonucl	4	3	3	3	30.7	13.742	127	8.1514	1295400000	1.07485	0.816425	0.861353	0.78383	0.910833	1.05217	0.986964	1.00211
E2RGI5	E2RGI5	tr|E2RGI5|E2RGI5_CANLF Guanine nucleotide-binding protein subunit gamma OS=Canis lupus familiaris GN=GNG5 PE=3 SV=2	1	2	2	2	23.9	7.2763	67	2.3413	730540000	0.851361	0.928256	0.9695	1.02939	1.08983	1.06089	0.0207317	0.864473
J9PBM1;J9NXZ7;E2RGI7	J9PBM1;J9NXZ7;E2RGI7	tr|J9PBM1|J9PBM1_CANLF Arginine and glutamate rich 1 OS=Canis lupus familiaris GN=ARGLU1 PE=4 SV=1;tr|J9NXZ7|J9NXZ7_CANLF Arginine and glutamate rich 1 OS=Canis lupus familiaris GN=ARGLU1 PE=4 SV=1;tr|E2RGI7|E2RGI7_CANLF Arginine and glutamate rich 1 OS=Ca	3	4	4	4	17.3	22.453	185	6.7324	513430000	0.946732	0.967624	0.955809	0.985219	1.28785	1.1835	0.0929371	0.83035
E2RGJ9;J9P1S6;E2QW70;E2RPT8	E2RGJ9;J9P1S6	tr|E2RGJ9|E2RGJ9_CANLF Cyclin dependent kinase 1 OS=Canis lupus familiaris GN=CDK1 PE=3 SV=1;tr|J9P1S6|J9P1S6_CANLF Cyclin dependent kinase 1 OS=Canis lupus familiaris GN=CDK1 PE=3 SV=1	4	7	7	7	26.9	34.065	297	31.939	1166200000	1.05474	1.09705	0.986109	0.993061	0.984788	1.05217	0.405026	1.0356
E2RGK2;J9JHC8	E2RGK2;J9JHC8	tr|E2RGK2|E2RGK2_CANLF Adenylosuccinate lyase OS=Canis lupus familiaris GN=TNRC6B PE=3 SV=1;tr|J9JHC8|J9JHC8_CANLF Uncharacterized protein OS=Canis lupus familiaris GN=TNRC6B PE=4 SV=1	2	7	7	7	20.2	55.409	490	33.583	980420000	1.12523	1.0609	1.23402	1.1399	0.870275	0.899811	0.161646	1.17532
J9P5V4;E2RGM0;J9NYC2	J9P5V4;E2RGM0;J9NYC2	tr|J9P5V4|J9P5V4_CANLF Uncharacterized protein OS=Canis lupus familiaris PE=3 SV=1;tr|E2RGM0|E2RGM0_CANLF Uncharacterized protein OS=Canis lupus familiaris PE=3 SV=2;tr|J9NYC2|J9NYC2_CANLF Uncharacterized protein OS=Canis lupus familiaris PE=3 SV=1	3	2	2	2	17.7	11.066	96	15.393	58290000000	0.739812	0.765079	1.01649	1.12098	1.0236	0.968859	0.116685	0.809838
E2RGM1	E2RGM1	tr|E2RGM1|E2RGM1_CANLF tRNA methyltransferase subunit 11-2 OS=Canis lupus familiaris GN=TRMT112 PE=4 SV=1	1	3	3	3	30.4	14.143	125	10.855	619930000	1.12259	0.839694	1.16025	1.05708	0.393605	0.992526	0.388356	1.27805
E2RGM6;J9NT22	E2RGM6;J9NT22	tr|E2RGM6|E2RGM6_CANLF Thioesterase superfamily member 4 OS=Canis lupus familiaris GN=THEM4 PE=4 SV=2;tr|J9NT22|J9NT22_CANLF Thioesterase superfamily member 4 OS=Canis lupus familiaris GN=THEM4 PE=4 SV=1	2	3	3	3	18.2	26.308	236	14.992	506130000	1.0746	1.15495	0.953535	0.912592	0.889772	0.882947	0.0487239	1.18537
E2RGN5;J9P2X4	E2RGN5;J9P2X4	tr|E2RGN5|E2RGN5_CANLF Small ubiquitin-related modifier OS=Canis lupus familiaris GN=SUMO3 PE=3 SV=1;tr|J9P2X4|J9P2X4_CANLF Uncharacterized protein OS=Canis lupus familiaris PE=4 SV=1	2	2	2	2	23.2	10.871	95	5.5797	2108500000	1.01183	1.10233	1.10904	1.09599	0.779612	0.918475	0.213447	1.15359
E2RGN6	E2RGN6	tr|E2RGN6|E2RGN6_CANLF Prohibitin 2 OS=Canis lupus familiaris GN=PHB2 PE=4 SV=2	1	18	18	18	61.9	33.453	299	67.371	20895000000	0.944558	0.899297	0.954141	0.964198	0.986932	0.961831	0.109909	0.960533
E2RGP6	E2RGP6	tr|E2RGP6|E2RGP6_CANLF Tumor susceptibility 101 OS=Canis lupus familiaris GN=TSG101 PE=4 SV=2	1	2	2	2	5.1	44.092	391	5.7046	199230000	1.07049	1.52792	0.656017	0.943271	1.54749	0.381725	0.777086	1.13297
E2RGQ1;E2RGP8	E2RGQ1;E2RGP8	tr|E2RGQ1|E2RGQ1_CANLF Protein tyrosine kinase 2 OS=Canis lupus familiaris GN=PTK2 PE=3 SV=2;tr|E2RGP8|E2RGP8_CANLF Protein tyrosine kinase 2 (Fragment) OS=Canis lupus familiaris GN=PTK2 PE=4 SV=2	2	4	4	4	5.4	119.19	1052	9.1644	300950000	1.20256	0	1.15218	1.02919	0	1.12226	0.904875	1.09449
J9NVU2;F1PZ77;E2RGQ5;J9P7V0	J9NVU2;F1PZ77;E2RGQ5	tr|J9NVU2|J9NVU2_CANLF Uncharacterized protein OS=Canis lupus familiaris PE=4 SV=1;tr|F1PZ77|F1PZ77_CANLF Uncharacterized protein OS=Canis lupus familiaris PE=4 SV=2;tr|E2RGQ5|E2RGQ5_CANLF Ribosomal protein S10 OS=Canis lupus familiaris GN=RPS10 PE=4 SV=1	4	9	9	9	44.2	18.814	165	50.408	16412000000	1.05563	1.12702	0.983514	1.10935	1.09551	1.12667	0.263404	0.950363
E2RGR9	E2RGR9	tr|E2RGR9|E2RGR9_CANLF Fumarate hydratase OS=Canis lupus familiaris GN=FH PE=3 SV=1	1	14	14	14	35.4	54.451	508	64.488	7568300000	1.06178	1.02995	1.09623	0.954784	0.832506	0.91411	0.0163731	1.18011
E2RGS7;J9NVT9	E2RGS7;J9NVT9	tr|E2RGS7|E2RGS7_CANLF UBX domain protein 1 OS=Canis lupus familiaris GN=UBXN1 PE=4 SV=1;tr|J9NVT9|J9NVT9_CANLF UBX domain protein 1 OS=Canis lupus familiaris GN=UBXN1 PE=4 SV=1	2	3	3	3	11.8	33.344	296	13.913	524270000	1.05089	1.17833	1.09425	1.13175	0.813032	1.08521	0.40912	1.09686
E2RGT2	E2RGT2	tr|E2RGT2|E2RGT2_CANLF Calcium load-activated calcium channel OS=Canis lupus familiaris GN=TMCO1 PE=3 SV=2	1	3	3	3	16.5	21.175	188	5.083	460180000	1.17082	0.954439	0	1.18965	1.51419	0	0.757844	0.786013
E2RGY8;J9P825;E2RI82;E2RGY7	E2RGY8;J9P825;E2RI82	tr|E2RGY8|E2RGY8_CANLF NADH:ubiquinone oxidoreductase subunit V3 OS=Canis lupus familiaris GN=NDUFV3 PE=4 SV=2;tr|J9P825|J9P825_CANLF NADH:ubiquinone oxidoreductase subunit V3 OS=Canis lupus familiaris GN=NDUFV3 PE=4 SV=1;tr|E2RI82|E2RI82_CANLF NADH:ubiqui	4	9	9	9	23.5	49.905	456	26.843	467920000	0.982157	1.04852	0.774823	0.947225	0.955811	0.885985	0.951744	1.00591
E2RGZ5	E2RGZ5	tr|E2RGZ5|E2RGZ5_CANLF Uncharacterized protein OS=Canis lupus familiaris GN=TMED2 PE=3 SV=1	1	4	4	4	20.9	22.733	201	11.054	4749000000	0.978821	0.957521	0.857657	0.984869	1.0294	0.733655	0.884626	1.01677
E2RH09	E2RH09	tr|E2RH09|E2RH09_CANLF Sjogren syndrome antigen B OS=Canis lupus familiaris GN=SSB PE=4 SV=2	1	15	15	15	35.5	46.699	406	57.12	9081200000	1.03336	1.10192	0.896502	1.08881	1.17237	1.11622	0.151972	0.897669
E2RH14;J9P5X6;J9P0Z1	E2RH14;J9P5X6;J9P0Z1	tr|E2RH14|E2RH14_CANLF Exportin 7 OS=Canis lupus familiaris GN=XPO7 PE=4 SV=2;tr|J9P5X6|J9P5X6_CANLF Exportin 7 OS=Canis lupus familiaris GN=XPO7 PE=4 SV=1;tr|J9P0Z1|J9P0Z1_CANLF Exportin 7 OS=Canis lupus familiaris GN=XPO7 PE=4 SV=1	3	11	11	11	12.3	123.94	1087	22.769	506510000	1.07014	1.0854	0.973045	1.02783	0.806198	1.1805	0.755934	1.03784
E2RH29	E2RH29	tr|E2RH29|E2RH29_CANLF Sec23 homolog B, coat complex II component OS=Canis lupus familiaris GN=SEC23B PE=4 SV=1	1	8	8	8	13.8	86.409	767	28.835	655970000	1.04327	0.989184	0.965674	1.05778	0.867843	1.01077	0.75496	1.02102
E2RH41	E2RH41	tr|E2RH41|E2RH41_CANLF UTP20, small subunit processome component OS=Canis lupus familiaris GN=UTP20 PE=4 SV=2	1	10	10	10	3.5	319.16	2782	18.556	589050000	0.912809	0.959633	0.709886	1.006	1.1448	1.26862	0.0608395	0.755194
E2RH47	E2RH47	sp|E2RH47|RS3_CANLF 40S ribosomal protein S3 OS=Canis lupus familiaris GN=RPS3 PE=1 SV=1	1	18	18	18	74.9	26.674	243	190.38	75605000000	1.00806	0.986849	1.02366	1.05897	1.14475	1.11942	0.021206	0.908344
E2RH48	E2RH48	tr|E2RH48|E2RH48_CANLF Proteasome 26S subunit, ATPase 4 OS=Canis lupus familiaris GN=PSMC4 PE=3 SV=1	1	10	10	10	26.6	47.366	418	66.365	3881800000	0.895398	1.05521	1.03341	1.049	1.04545	1.1368	0.230226	0.923489
E2RH50	E2RH50	tr|E2RH50|E2RH50_CANLF Tryptophanyl tRNA synthetase 2, mitochondrial OS=Canis lupus familiaris GN=WARS2 PE=3 SV=1	1	2	2	2	5.3	39.768	360	4.2201	62526000	0.828986	0.996083	0	1.04682	0.905211	0	0.929574	0.93496
E2RH57	E2RH57	tr|E2RH57|E2RH57_CANLF RNA polymerase I subunit C OS=Canis lupus familiaris GN=POLR1C PE=4 SV=1	1	4	4	4	13.6	39.19	346	14.995	366280000	1.13756	0.631885	0.847005	1.12753	1.1616	1.03161	0.196393	0.78791
E2RH63	E2RH63	tr|E2RH63|E2RH63_CANLF STEAP2 metalloreductase OS=Canis lupus familiaris GN=STEAP2 PE=4 SV=2	1	2	2	2	3.4	53.064	465	2.6828	43234000	1.21193	0	1.10263	0.652065	0	1.0977	0.726366	1.32278
E2RH71	E2RH71	tr|E2RH71|E2RH71_CANLF Dynein cytoplasmic 1 light intermediate chain 1 OS=Canis lupus familiaris GN=DYNC1LI1 PE=4 SV=1	1	3	3	3	7.3	56.498	524	3.5268	96472000	0.940226	0	0.887071	1.1417	0	1.0742	0.800345	0.824628
E2RH87	E2RH87	tr|E2RH87|E2RH87_CANLF Eukaryotic translation initiation factor 4 gamma 3 OS=Canis lupus familiaris GN=EIF4G3 PE=4 SV=2	1	5	2	2	3.1	180.04	1620	2.8758	138200000	0.972145	0	0.84828	1.15197	0	1.28577	0.707131	0.746769
E2RH91	E2RH91	tr|E2RH91|E2RH91_CANLF Staphylococcal nuclease and tudor domain containing 1 OS=Canis lupus familiaris GN=SND1 PE=4 SV=2	1	36	36	36	44.4	101.99	910	176.38	20330000000	0.993036	0.979433	1.01609	1.092	1.08387	1.06218	0.00394015	0.922951
E2RHA0;J9NW81;E2R1M3;J9NRN3	E2RHA0;J9NW81	tr|E2RHA0|E2RHA0_CANLF Chromodomain helicase DNA binding protein 4 OS=Canis lupus familiaris GN=CHD4 PE=4 SV=2;tr|J9NW81|J9NW81_CANLF Chromodomain helicase DNA binding protein 4 OS=Canis lupus familiaris GN=CHD4 PE=4 SV=1	4	22	22	19	14.5	217.98	1912	69.416	1384400000	0.960746	0.997921	0.789661	1.00357	1.07656	0.852642	0.540444	0.93711
E2RHA5	E2RHA5	tr|E2RHA5|E2RHA5_CANLF Leucine zipper and EF-hand containing transmembrane protein 1 OS=Canis lupus familiaris GN=LETM1 PE=4 SV=2	1	18	18	18	28.3	83.237	741	73.924	4307600000	0.926364	1.01564	0.858412	1.01877	0.967294	1.08973	0.187024	0.910472
E2RHB3	E2RHB3	tr|E2RHB3|E2RHB3_CANLF Apoptosis inhibitor 5 OS=Canis lupus familiaris GN=API5 PE=4 SV=1	1	12	12	12	23.1	59.013	524	33.114	3452700000	0.906303	0.867002	0.933664	1.13384	0.627754	1.08017	0.794836	0.952567
E2RHB9	E2RHB9	tr|E2RHB9|E2RHB9_CANLF Squalene epoxidase OS=Canis lupus familiaris GN=SQLE PE=4 SV=1	1	10	10	10	21.6	63.921	573	29.983	1213200000	0.902826	0.80106	0.88135	1.03541	0.966822	1.21909	0.059801	0.802537
E2RHC4	E2RHC4	tr|E2RHC4|E2RHC4_CANLF pre-rRNA processing protein FTSJ3 OS=Canis lupus familiaris GN=FTSJ3 PE=3 SV=2	1	10	10	10	11.8	95.488	837	19.384	1215000000	1.03691	1.00258	0.896245	0.972963	1.39259	0.874222	0.571065	0.906154
E2RHC6	E2RHC6	tr|E2RHC6|E2RHC6_CANLF DNA (cytosine-5)-methyltransferase OS=Canis lupus familiaris GN=DNMT1 PE=3 SV=2	1	5	5	5	2.9	182.52	1613	9.2111	415180000	1.07194	1.0387	1.11187	1.05075	1.06923	1.18025	0.600612	0.976451
E2RHF4	E2RHF4	tr|E2RHF4|E2RHF4_CANLF Delta 4-desaturase, sphingolipid 2 OS=Canis lupus familiaris GN=DEGS2 PE=4 SV=1	1	2	2	2	9	36.767	323	14.495	314400000	0.859993	1.05694	1.01156	0.847368	0.772725	1.22214	0.858494	1.03035
E2RHF5;F1PZD0;F6XA89;Q9XST9;F1PZD9;J9PA77;F1P9Z0;J9NVV9	E2RHF5;F1PZD0	tr|E2RHF5|E2RHF5_CANLF Uncharacterized protein OS=Canis lupus familiaris PE=4 SV=2;tr|F1PZD0|F1PZD0_CANLF 60S ribosomal protein L29 OS=Canis lupus familiaris PE=3 SV=2	8	4	4	4	21.5	26.506	251	10.806	5883900000	0.896574	0.835354	1.04545	1.23764	1.0712	0.965433	0.175825	0.848242
E2RHF6	E2RHF6	tr|E2RHF6|E2RHF6_CANLF ElaC ribonuclease Z 2 OS=Canis lupus familiaris GN=ELAC2 PE=4 SV=2	1	2	2	2	3.3	91.265	821	4.685	54239000	0	1.38342	0.954479	0	0.958187	0.754763	0.699514	1.36484
E2RHI0	E2RHI0	tr|E2RHI0|E2RHI0_CANLF Heat shock protein family A (Hsp70) member 14 OS=Canis lupus familiaris GN=HSPA14 PE=3 SV=2	1	3	3	3	6.9	54.988	509	7.5907	59237000	0.966305	0	1.08346	1.05171	0	1.06869	0.964175	0.966685
E2RHL0	E2RHL0	tr|E2RHL0|E2RHL0_CANLF Ubiquinol-cytochrome c reductase core protein II OS=Canis lupus familiaris GN=UQCRC2 PE=3 SV=2	1	13	13	13	38.2	41.037	382	81.036	8835300000	1.00865	0.930784	1.05762	0.967573	0.965651	1.00423	0.637315	1.02029
E2RHL4	E2RHL4	tr|E2RHL4|E2RHL4_CANLF ADP ribosylation factor 6 OS=Canis lupus familiaris GN=ARF6 PE=3 SV=1	1	2	2	2	18.3	20.082	175	18.406	738080000	1.1844	0.84841	1.14915	1.16757	1.21018	1.05726	0.507187	0.926332
E2RHM4	E2RHM4	tr|E2RHM4|E2RHM4_CANLF Isocitrate dehydrogenase [NAD] subunit, mitochondrial OS=Canis lupus familiaris GN=IDH3A PE=3 SV=1	1	14	14	14	39.1	39.757	366	116.47	6981200000	0.83685	0.931536	1.04317	0.992954	1.0606	1.07361	0.179041	0.899077
E2RHP8;E2RHP4;E2RHP7	E2RHP8;E2RHP4;E2RHP7	tr|E2RHP8|E2RHP8_CANLF LRR binding FLII interacting protein 2 OS=Canis lupus familiaris GN=LRRFIP2 PE=4 SV=2;tr|E2RHP4|E2RHP4_CANLF LRR binding FLII interacting protein 2 OS=Canis lupus familiaris GN=LRRFIP2 PE=4 SV=2;tr|E2RHP7|E2RHP7_CANLF LRR binding FLI	3	5	5	4	11.1	57.487	503	12.334	913700000	0.971245	1.26619	1.11962	0.96704	1.01231	1.09676	0.372037	1.09133
E2RHP5	E2RHP5	tr|E2RHP5|E2RHP5_CANLF FAST kinase domains 5 OS=Canis lupus familiaris GN=FASTKD5 PE=4 SV=2	1	5	5	5	8.3	86.42	758	12.57	107940000	0.875126	0.965575	1.11074	0.954204	1.02993	0.957214	0.96541	1.00343
E2RHR0	E2RHR0	tr|E2RHR0|E2RHR0_CANLF ADP ribosylation factor GTPase activating protein 1 OS=Canis lupus familiaris GN=ARFGAP1 PE=4 SV=2	1	2	2	2	5.3	45.505	417	5.3148	101820000	1.11329	0	1.29368	1.11519	0	1.10599	0.915521	1.08365
J9NZK1;E2RHU5	J9NZK1;E2RHU5	tr|J9NZK1|J9NZK1_CANLF Calcium homeostasis endoplasmic reticulum protein OS=Canis lupus familiaris GN=CHERP PE=4 SV=1;tr|E2RHU5|E2RHU5_CANLF Calcium homeostasis endoplasmic reticulum protein OS=Canis lupus familiaris GN=CHERP PE=4 SV=2	2	4	4	4	7	103.79	916	18.132	589340000	0.869599	1.02659	0.903076	1.04582	1.02642	1.20388	0.0973715	0.854445
E2RHU6	E2RHU6	tr|E2RHU6|E2RHU6_CANLF Tyrosine--tRNA ligase OS=Canis lupus familiaris GN=YARS2 PE=3 SV=1	1	4	4	4	9.2	52.78	477	28.531	779940000	1.00186	1.0946	1.11993	0.924755	1.03419	1.19673	0.827024	1.01924
E2RHV4	E2RHV4	tr|E2RHV4|E2RHV4_CANLF Exosome component 3 OS=Canis lupus familiaris GN=EXOSC3 PE=4 SV=1	1	3	3	3	16	29.548	275	10.155	184150000	1.0079	1.05516	1.76835	1.02479	0.925028	2.23165	0.822295	0.916285
E2RHV6	E2RHV6	tr|E2RHV6|E2RHV6_CANLF NCK adaptor protein 1 OS=Canis lupus familiaris GN=NCK1 PE=4 SV=1	1	4	4	3	10.6	42.932	377	3.339	104720000	1.08025	1.12687	1.2647	0.933454	0.791233	1.0422	0.061843	1.25477
E2RHW4	E2RHW4	tr|E2RHW4|E2RHW4_CANLF Transmembrane protein 65 OS=Canis lupus familiaris GN=TMEM65 PE=4 SV=1	1	2	2	2	9.5	25.554	242	5.3069	117690000	0.959533	0	0.89267	0.972063	0	0.95571	0.957669	0.9608
E2RHX1;J9P2X7	E2RHX1	tr|E2RHX1|E2RHX1_CANLF Ly1 antibody reactive OS=Canis lupus familiaris GN=LYAR PE=4 SV=2	2	11	11	11	33.2	42.982	380	41.724	1422700000	1.09718	0.934207	0.872007	0.91584	1.16964	0.818667	0.998485	0.999741
E2RHY0	E2RHY0	tr|E2RHY0|E2RHY0_CANLF Plakophilin 2 OS=Canis lupus familiaris GN=PKP2 PE=4 SV=1	1	23	23	23	36.5	92.733	836	126.86	4861200000	0.861494	0.945776	0.854303	0.933567	0.713882	1.02807	0.964288	0.994787
E2RHY1;F1PX89	E2RHY1;F1PX89	tr|E2RHY1|E2RHY1_CANLF ATPase family, AAA domain containing 1 OS=Canis lupus familiaris GN=ATAD1 PE=3 SV=2;tr|F1PX89|F1PX89_CANLF ATPase family, AAA domain containing 1 OS=Canis lupus familiaris GN=ATAD1 PE=3 SV=2	2	5	5	5	14.9	41.712	369	21.12	612920000	0.992722	0.989326	0.872107	0.929094	1.02874	1.10817	0.339939	0.930904
E2RHY8	E2RHY8	tr|E2RHY8|E2RHY8_CANLF Farnesyltransferase, CAAX box, alpha OS=Canis lupus familiaris GN=FNTA PE=4 SV=1	1	3	3	3	8.2	44.57	380	5.9862	240080000	0.84762	0.842036	1.24232	0.823598	0.781159	1.25413	0.909351	1.02557
E2RHZ1	E2RHZ1	tr|E2RHZ1|E2RHZ1_CANLF Casein kinase 2 alpha 3 OS=Canis lupus familiaris GN=CSNK2A3 PE=3 SV=1	1	8	8	8	22.8	45.143	391	22.466	1603100000	0.858319	0.919735	0.96582	1.00481	0.966981	1.08852	0.0906894	0.896601
E2RI34;F1Q0S5;F1PWI8;J9NXP9	E2RI34;F1Q0S5;F1PWI8	tr|E2RI34|E2RI34_CANLF Uncharacterized protein OS=Canis lupus familiaris GN=RPL27A PE=3 SV=1;tr|F1Q0S5|F1Q0S5_CANLF Uncharacterized protein OS=Canis lupus familiaris GN=RPL27A PE=3 SV=2;tr|F1PWI8|F1PWI8_CANLF Uncharacterized protein OS=Canis lupus familiar	4	7	7	7	47.3	16.577	148	27.082	19512000000	1.06822	1.0199	1.01211	1.0334	1.0484	1.06494	0.476829	0.98522
E2RI65;F1PRK3;J9NYZ6	E2RI65;F1PRK3	tr|E2RI65|E2RI65_CANLF Uncharacterized protein OS=Canis lupus familiaris PE=4 SV=2;tr|F1PRK3|F1PRK3_CANLF Uncharacterized protein OS=Canis lupus familiaris PE=4 SV=2	3	5	5	5	11.6	48.411	457	11.62	1052200000	1.06754	0.946264	0.777349	1.04363	1.01768	1.14436	0.20992	0.870696
E2RI67	E2RI67	tr|E2RI67|E2RI67_CANLF NFKB repressing factor OS=Canis lupus familiaris GN=NKRF PE=4 SV=2	1	8	8	8	12	88.181	784	19.494	484330000	0.893408	1.09473	1.09581	1.02872	1.12885	1.18865	0.34579	0.921619
J9P1A8;E2RI74	J9P1A8;E2RI74	tr|J9P1A8|J9P1A8_CANLF Phospholipase A2 activating protein OS=Canis lupus familiaris GN=PLAA PE=4 SV=1;tr|E2RI74|E2RI74_CANLF Phospholipase A2 activating protein OS=Canis lupus familiaris GN=PLAA PE=4 SV=2	2	5	5	5	7.7	87.14	796	14.698	417410000	1.19045	0.935289	1.08867	1.08856	1.0505	0.906013	0.575431	1.05561
J9P4Z0;J9NYD1;E2RI84	J9P4Z0;J9NYD1;E2RI84	tr|J9P4Z0|J9P4Z0_CANLF Proline rich coiled-coil 2C OS=Canis lupus familiaris GN=PRRC2C PE=4 SV=1;tr|J9NYD1|J9NYD1_CANLF Proline rich coiled-coil 2C OS=Canis lupus familiaris GN=PRRC2C PE=4 SV=1;tr|E2RI84|E2RI84_CANLF Proline rich coiled-coil 2C OS=Canis lu	3	29	29	28	13.8	304.52	2774	93.079	1611700000	0.992875	1.06203	1.03536	0.991275	1.16051	0.973722	0.860858	0.988724
E2RI99;E2RI87	E2RI99;E2RI87	tr|E2RI99|E2RI99_CANLF Signal transducer and activator of transcription OS=Canis lupus familiaris GN=STAT1 PE=3 SV=2;tr|E2RI87|E2RI87_CANLF Signal transducer and activator of transcription OS=Canis lupus familiaris GN=STAT1 PE=3 SV=2	2	11	11	11	19.5	87.281	750	80.152	604950000	1.09228	1.17086	1.07967	0.932518	0.894781	1.0905	0.0997605	1.14566
E2RIA8	E2RIA8	tr|E2RIA8|E2RIA8_CANLF Ribosomal protein L8 OS=Canis lupus familiaris GN=RPL8 PE=3 SV=1	1	11	11	11	44.7	28.024	257	118.47	33584000000	1.0092	0.899735	0.929181	1.00155	1.08248	1.02054	0.09521	0.914173
E2RIB8	E2RIB8	tr|E2RIB8|E2RIB8_CANLF RNA binding motif protein 28 OS=Canis lupus familiaris GN=RBM28 PE=4 SV=1	1	8	8	8	13.2	85.166	751	41.167	678310000	0.959084	0.740538	1.01304	0.935973	0.483185	1.03442	0.671559	1.10559
E2RIC4	E2RIC4	tr|E2RIC4|E2RIC4_CANLF DEAD-box helicase 24 OS=Canis lupus familiaris GN=DDX24 PE=4 SV=2	1	4	4	4	5.4	92.216	818	9.4904	81674000	0	1.04282	0.773334	0	0.947465	1.08903	0.881695	0.891805
E2RID8;J9P6V4;Q9MZV7;F1PBR9;F1PDN5;A9YEF4	E2RID8;J9P6V4	tr|E2RID8|E2RID8_CANLF ATP-dependent RNA helicase DHX29 OS=Canis lupus familiaris GN=DHX29 PE=3 SV=1;tr|J9P6V4|J9P6V4_CANLF ATP-dependent RNA helicase DHX29 OS=Canis lupus familiaris GN=DHX29 PE=3 SV=1	6	8	8	8	7.5	155.11	1367	27.274	545740000	0.990417	1.08256	1.1029	0.99916	0.832487	1.15973	0.574045	1.06168
J9P2W5;E2RIE8	J9P2W5;E2RIE8	tr|J9P2W5|J9P2W5_CANLF Gem nuclear organelle associated protein 5 OS=Canis lupus familiaris GN=GEMIN5 PE=4 SV=1;tr|E2RIE8|E2RIE8_CANLF Gem nuclear organelle associated protein 5 OS=Canis lupus familiaris GN=GEMIN5 PE=4 SV=2	2	8	8	8	7.6	167.98	1507	15.58	518750000	1.0751	1.20404	1.14129	1.041	1.00421	1.04738	0.0508059	1.10601
E2RIG0	E2RIG0	tr|E2RIG0|E2RIG0_CANLF NADH dehydrogenase [ubiquinone] 1 alpha subcomplex subunit 10, mitochondrial OS=Canis lupus familiaris GN=NDUFA10 PE=3 SV=2	1	6	6	6	18.1	39.873	349	25.188	769260000	1.03587	0.95322	1.16911	1.09459	0.878961	0.971287	0.467297	1.07245
E2RIH9	E2RIH9	tr|E2RIH9|E2RIH9_CANLF ADP dependent glucokinase OS=Canis lupus familiaris GN=ADPGK PE=4 SV=2	1	3	3	3	6.5	53.568	494	7.4822	790730000	0.955484	0.891989	1.21112	1.03588	0.989832	0.998864	0.913948	1.01125
E2RII7	E2RII7	tr|E2RII7|E2RII7_CANLF Receptor expression-enhancing protein OS=Canis lupus familiaris GN=REEP4 PE=3 SV=1	1	2	2	2	7	29.571	257	4.4814	191940000	1.1914	0.986077	1.00136	1.11017	0.817223	1.27073	0.967507	0.993971
E2RIM3	E2RIM3	tr|E2RIM3|E2RIM3_CANLF Exosome component 4 OS=Canis lupus familiaris GN=EXOSC4 PE=4 SV=1	1	4	4	4	19.2	26.435	245	32.114	785950000	0.954436	0.947504	0.917507	0.913896	0.927619	0.948744	0.557027	1.01046
E2RIQ8	E2RIQ8	tr|E2RIQ8|E2RIQ8_CANLF Ribosomal protein S5 OS=Canis lupus familiaris GN=RPS5 PE=3 SV=1	1	11	11	11	54.4	22.876	204	115.39	27347000000	1.08035	1.0773	1.08191	1.00576	1.07064	1.05639	0.145618	1.03408
E2RIR8	E2RIR8	tr|E2RIR8|E2RIR8_CANLF Membrane associated ring-CH-type finger 5 OS=Canis lupus familiaris GN=MARCH5 PE=4 SV=1	1	1	1	1	5.8	31.197	278	5.3409	110920000	0.931672	0	0.978404	1.11207	0	1.16605	0.816787	0.838441
E2RIU2	E2RIU2	tr|E2RIU2|E2RIU2_CANLF Charged multivesicular body protein 2A OS=Canis lupus familiaris GN=CHMP2A PE=3 SV=1	1	2	2	2	8.6	25.162	222	3.7726	96463000	1.26321	1.00333	0	1.01484	1.19505	0	0.973558	1.02563
E2RIU5	E2RIU5	tr|E2RIU5|E2RIU5_CANLF Ubiquitin conjugating enzyme E2 M OS=Canis lupus familiaris GN=UBE2M PE=3 SV=1	1	6	6	6	36.2	21.112	185	19.666	1099000000	1.06688	1.02686	1.12721	1.03482	0.855832	1.06368	0.280306	1.09025
E2RIV1	E2RIV1	tr|E2RIV1|E2RIV1_CANLF AP complex subunit beta OS=Canis lupus familiaris GN=AP2B1 PE=3 SV=2	1	21	21	10	21	105.69	951	55.983	6247600000	1.0456	1.01141	1.09486	0.957178	0.901285	1.01375	0.0828212	1.09736
[truncated: 1,498 more rows]
