# Supplementary material for: Quantitative proteomic analysis of MDCK cell adhesion
Source: Royal Society of Chemistry journal article supplement (doi:10.1039/d0mo00055h), 2020-11-12
Supplement: d0mo00055h4.pdf [file d0mo00055h4.pdf]

Table. S1 Primers used  
in this study.

| <b>Primer name</b> | <b>Sequence</b>        |
|--------------------|------------------------|
| ACTN1-F            | AAGGACGGCCTCGGTTTC     |
| ACTN1-R            | GTGTTTCAGATTTGTGAGTGGG |
| CAV1-F             | CATCCCAATGGCACTCAT     |
| CAV1-R             | GTGGACGTAGATGGAATAGACA |
| CDH1-F             | TATTCTGACGTTTAGCGTAGTG |
| CDH1-R             | CCACCTCCAAGTCCATTTT    |
| CNN3-F             | ATAGCGATTATCAGGCGGAGTA |
| CNN3-R             | GCCTTGGTCGCCGTATTG     |
| CTNNA1-F           | CTTCTAATAATCGCAGTGTT   |
| CTNNA1-R           | GTCTAAGTTACCGCCTAA     |
| CTNNB1-F           | GGACCTACACTTACGAGAA    |
| CTNNB1-R           | TTATTACTAGAGCAGACAGACA |
| DPP4-F             | AAACCGACAATCTCATCTCA   |
| DPP4-R             | CACTGGTGGAATTATAGTCATA |
| DSG3-F             | ATGGTGCTCATACTGGTTCA   |
| DSG3-R             | TTGTATCTCCTTCTGCCTTG   |
| DSP-F              | GACCCAAGTGATGATACAAA   |
| DSP-R              | TCAACAATGACTACTCTACGC  |
| EPCAM-F            | AATGGACCTAAGAGTAAACGG  |
| EPCAM-R            | AACCACAATGACAGCGATA    |
| JUP-F              | GATGACATGGACGCCACCTA   |
| JUP-R              | CAGATGAGGAACCGCACTGGA  |
| TGM2-F             | CTGCCAGCGTGTCAAGTAT    |
| TGM2-R             | TGGTCATGCGCCGAGTTA     |
