# Supplementary figures and images for: Quantitative proteomic analysis of MDCK cell adhesion
Source: Royal Society of Chemistry journal article supplement (doi:10.1039/d0mo00055h), 2020-11-12

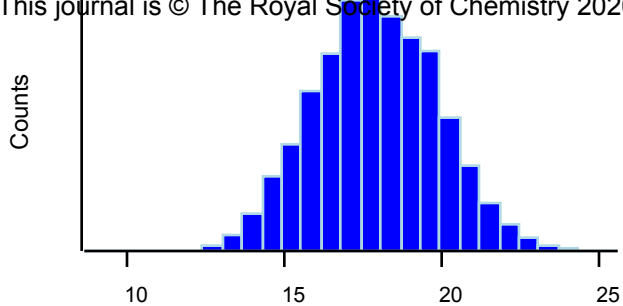

MDCKSUS\_1

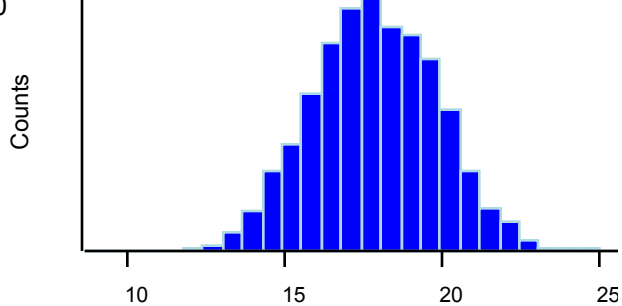

MDCKADH\_1

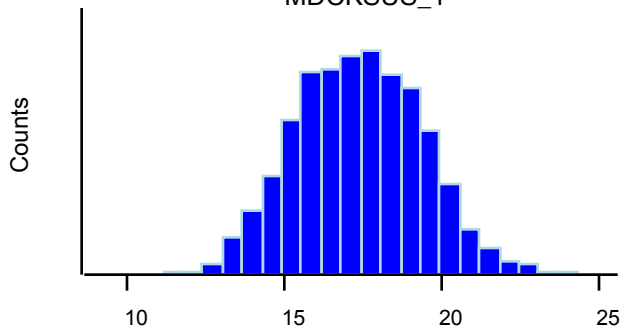

MDCKSUS\_2

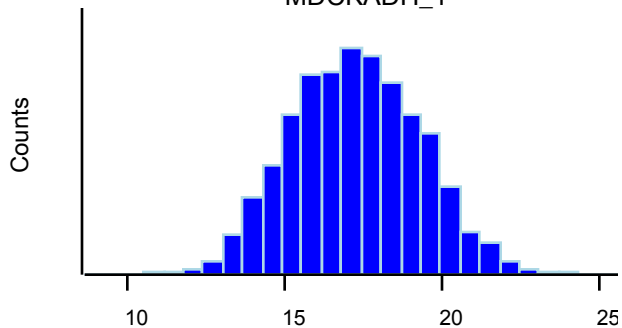

MDCKADH\_2

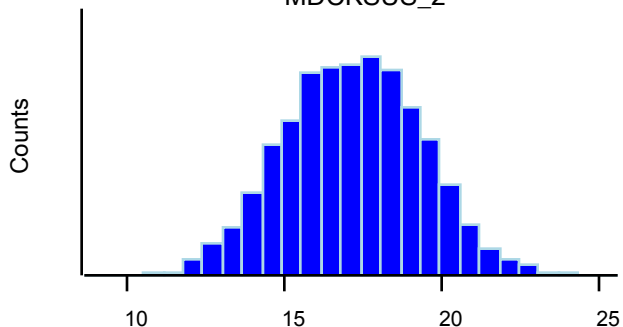

MDCKSUS\_3

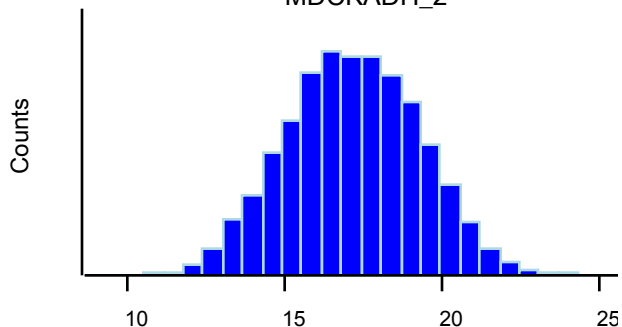

MDCKADH\_3

Supplement: d0mo00055h1.pdf [file d0mo00055h1.pdf]

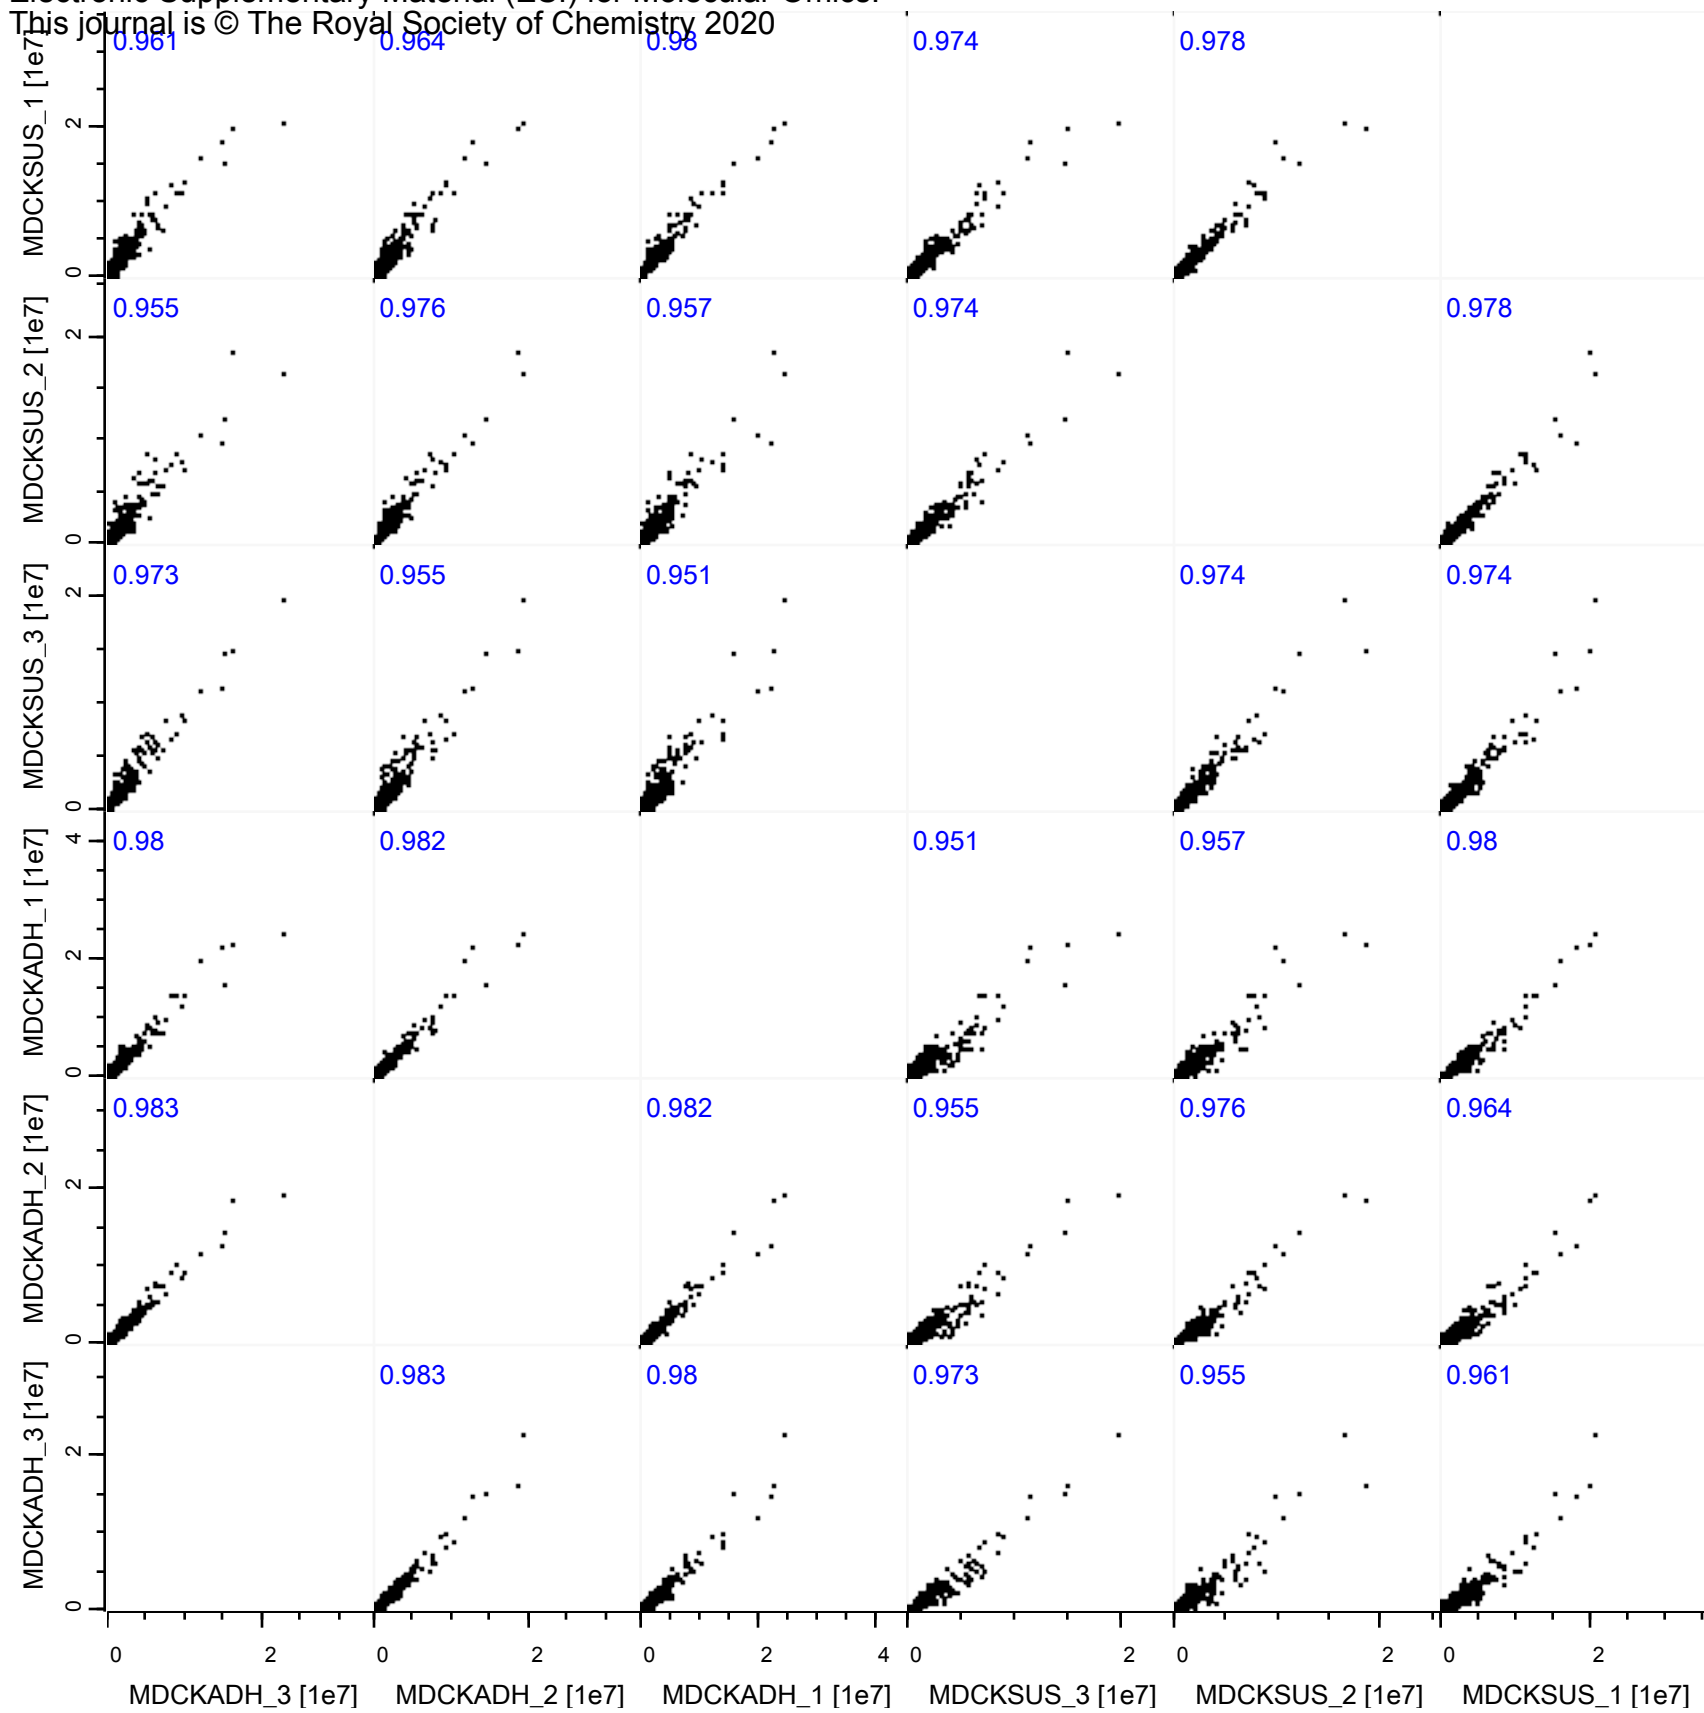

Supplement: d0mo00055h2.pdf [file d0mo00055h2.pdf]
